# Supplementary material for: Light-regulated allosteric switch enables temporal and subcellular control of enzyme activity
Source: eLife. 2020 Sep 23;9:e60647. doi: 10.7554/eLife.60647 (PMC7577742; doi:10.7554/eLife.60647)
Supplement: Figure 1—source data 1. [file elife-60647-fig1-data1.xlsx]

## Sheet: Backbone RMSD of System
Frame	RMSD Dark 1	RMSD Dark 2	RMSD Dark 3	RMSD Light 1	RMSD Light 2	RMSD Light 3		Avg Dark	SEM		Avg Light	SEM
0	0	0	0	0	0	0		0	0		0	0
0.2	1.92758	1.92751	1.92178	1.01795	1.03052	1.02179		1.92562	0.00192269		1.02342	0.00372
0.4	5.0649	5.06424	5.21124	4.72158	3.23127	4.32897		5.11346	0.0488914		4.09394	0.44598
0.6	5.85449	5.85405	6.55194	4.4547	4.22699	5.78622		6.08683	0.232558		4.82264	0.48626
0.8	6.04607	6.04541	6.60939	4.70757	4.60098	5.00212		6.23362	0.187884		4.77022	0.11996
1	7.91171	7.91109	6.74039	6.84498	5.1101	4.15911		7.52106	0.390338		5.3714	0.78627
1.2	8.34241	8.34185	7.62346	6.53526	5.94989	5.1372		8.10257	0.239558		5.87412	0.40536
1.4	8.67416	8.67374	8.9639	5.68497	5.03518	4.79523		8.7706	0.0966504		5.17179	0.26577
1.6	10.0283	10.0277	8.66452	7.03843	5.85251	4.50992		9.57348	0.454482		5.80029	0.73038
1.8	10.1514	10.1507	8.97443	6.80521	6.07123	5.40386		9.75881	0.392192		6.09343	0.40469
2	9.45908	9.45838	8.68258	6.61221	6.16342	5.01516		9.20001	0.258716		5.93027	0.47554
2.2	10.6523	10.6516	8.70246	6.89118	6.7785	5.00502		10.0021	0.649826		6.2249	0.61081
2.4	10.3219	10.3212	9.11675	7.83647	5.76011	4.83057		9.91993	0.401589		6.14238	0.88853
2.6	10.0435	10.0428	9.99103	6.53217	5.80152	5.14837		10.0258	0.0173707		5.82735	0.39968
2.8	9.63334	9.63275	10.789	7.23404	6.32398	5.21714		10.0184	0.385335		6.25839	0.58315
3	10.8656	10.865	11.3044	7.74287	6.4324	6.13504		11.0117	0.146364		6.7701	0.4939
3.2	10.5772	10.5766	10.8247	8.13603	6.91816	6.65414		10.6595	0.0826048		7.23611	0.45637
3.4	12.1325	12.1321	11.0124	8.0675	6.4933	5.97884		11.759	0.373303		6.84655	0.62828
3.6	11.4044	11.404	10.8029	7.31184	6.58384	5.80231		11.2037	0.200431		6.56599	0.43586
3.8	11.5833	11.5828	11.4039	8.12058	6.3841	5.98405		11.5234	0.059741		6.82958	0.65575
4	10.8882	10.8878	11.0258	8.29319	6.40044	6.58896		10.9339	0.0459337		7.0942	0.60196
4.2	11.2801	11.2796	10.8821	7.33936	5.78321	6.74215		11.1473	0.132605		6.62158	0.45325
4.4	10.9628	10.9622	10.8535	7.7122	6.55946	6.97575		10.9261	0.0363193		7.08247	0.33702
4.6	11.6526	11.6521	11.2197	8.65849	6.13709	5.70201		11.5081	0.144219		6.83253	0.92158
4.8	11.9338	11.9332	10.6354	7.55891	7.11967	5.84336		11.5008	0.432714		6.84065	0.51451
5	12.1499	12.1494	11.2131	8.16151	7.41697	6.14582		11.8375	0.31216		7.24143	0.58846
5.2	12.9841	12.9836	11.3398	7.76943	6.62809	5.68612		12.4358	0.547998		6.69455	0.60232
5.4	12.9482	12.9476	10.8782	8.3173	7.98842	6.39696		12.258	0.689913		7.56756	0.59295
5.6	12.8789	12.8785	10.4633	7.02848	6.95699	6.13463		12.0736	0.805141		6.7067	0.28678
5.8	13.0331	13.0326	10.3898	6.95403	7.87652	6.52643		12.1518	0.881015		7.11899	0.39837
6	13.8076	13.8072	10.9153	6.80016	6.84953	6.83386		12.8434	0.964025		6.82785	0.01457
6.2	13.1201	13.1197	10.8972	6.60526	6.46269	6.91725		12.379	0.7409		6.66174	0.13422
6.4	13.0215	13.021	11.6877	6.45236	6.07817	6.37889		12.5768	0.444524		6.30314	0.11447
6.6	13.3441	13.3436	11.3198	7.18837	6.18854	6.03551		12.6691	0.674684		6.47081	0.36149
6.8	14.2376	14.2371	10.3448	6.98249	7.32182	5.84239		12.9398	1.29752		6.71556	0.44744
7	14.0114	14.011	11.6567	7.39578	8.3858	5.54472		13.2264	0.784842		7.10877	0.83261
7.2	13.843	13.8426	9.94224	7.13699	7.17576	6.42196		12.5426	1.30017		6.91157	0.24506
7.4	14.233	14.2325	10.898	7.9957	7.98999	6.71681		13.1212	1.11157		7.5675	0.42535
7.6	13.9946	13.9941	9.83156	7.70705	7.93752	7.01606		12.6068	1.38759		7.55354	0.27685
7.8	13.6832	13.6827	11.2046	7.65392	7.44279	6.4095		12.8568	0.82611		7.16874	0.38448
8	13.841	13.8405	11.502	7.85582	7.56137	7.25268		13.0611	0.779594		7.55662	0.17413
8.2	13.4568	13.4564	11.3219	7.941	8.60994	6.69774		12.745	0.711578		7.74956	0.56024
8.4	13.1425	13.142	10.85	6.554	8.92054	7.37789		12.3781	0.764088		7.61748	0.69359
8.6	12.6448	12.6444	10.4316	7.08608	8.11399	6.7165		11.907	0.737671		7.30552	0.41807
8.8	12.3672	12.3668	10.4152	7.56985	8.31733	7.56571		11.7164	0.650611		7.81763	0.24985
9	12.6835	12.683	10.3549	7.4917	8.71756	6.51911		11.9072	0.776115		7.57612	0.63604
9.2	12.4533	12.4529	9.87046	7.67283	9.47157	6.92561		11.5922	0.860876		8.02334	0.75556
9.4	12.6707	12.6702	9.72961	7.71294	8.2125	6.48909		11.6902	0.980282		7.47151	0.51194
9.6	12.5073	12.5068	10.4193	8.06222	8.41027	6.86731		11.8111	0.695898		7.77993	0.46724
9.8	12.4836	12.4832	10.3033	7.93161	8.79197	7.19164		11.7567	0.726704		7.97174	0.46241
10	12.439	12.4384	10.3483	7.25944	9.80578	6.61966		11.7419	0.696786		7.89496	0.9731
10.2	12.9749	12.9743	11.1677	7.49133	9.41368	6.25523		12.3723	0.602294		7.72008	0.91891
10.4	12.5602	12.5597	11.011	7.18096	10.7066	6.42069		12.0436	0.516328		8.10276	1.32031
10.6	12.7419	12.7413	10.7264	7.22951	10.9354	6.55366		12.0699	0.671728		8.23951	1.36197
10.8	12.4761	12.4755	10.5772	7.66199	10.3128	6.70995		11.8429	0.632853		8.22824	1.0779
11	12.7889	12.7884	10.4981	7.78655	11.2763	5.50432		12.0251	0.76349		8.18905	1.67833
11.2	12.6165	12.616	10.6452	7.52649	9.7921	5.37032		11.9592	0.65701		7.56297	1.27659
11.4	13.4215	13.421	10.3885	6.72747	8.44832	5.81732		12.4103	1.0109		6.9977	0.77143
11.6	13.3118	13.3112	10.7894	6.32389	9.42902	6.44725		12.4708	0.840685		7.40005	1.01511
11.8	13.8689	13.8684	10.3966	6.86289	9.58161	6.64889		12.7113	1.15735		7.6978	0.94393
12	13.5693	13.5688	10.2231	6.19137	11.6905	6.16347		12.4537	1.11531		8.01511	1.8377
12.2	12.8206	12.82	10.3891	7.0583	10.6844	5.89069		12.0099	0.810398		7.8778	1.44322
12.4	13.5485	13.5479	10.298	6.9704	11.683	7.47058		12.4648	1.0834		8.70798	1.49448
12.6	13.3196	13.3191	11.3335	6.08431	11.1229	7.97428		12.6574	0.661939		8.39383	1.46956
12.8	13.4271	13.4266	11.2476	6.80104	9.69412	6.9745		12.7004	0.7264		7.82322	0.93679
13	12.9666	12.966	10.6812	7.13725	8.82822	8.29932		12.2046	0.761696		8.08826	0.49942
13.2	13.3249	13.3244	10.1803	6.35939	9.28796	7.57157		12.2765	1.04813		7.73964	0.84957
13.4	12.608	12.6074	10.246	7.20204	9.84035	7.63962		11.8205	0.787235		8.22734	0.81634
13.6	12.9996	12.999	10.102	6.53425	9.77231	7.70563		12.0335	0.965756		8.00407	0.94658
13.8	13.5956	13.595	10.7518	6.96457	9.26624	8.43846		12.6475	0.947843		8.22309	0.67311
14	12.9333	12.9328	9.95823	6.15698	9.2915	7.67857		11.9414	0.991601		7.70902	0.90499
14.2	12.0176	12.0171	9.71657	6.10293	10.037	7.64589		11.2504	0.766922		7.9286	1.14443
14.4	12.2149	12.2144	10.1463	5.98599	10.0435	8.14918		11.5252	0.68946		8.05957	1.17217
14.6	13.1635	13.163	9.94787	6.20973	11.5327	7.59946		12.0915	1.07181		8.4473	1.59402
14.8	12.6897	12.6893	10.106	6.30241	13.3187	8.99458		11.8284	0.861162		9.53857	2.04362
15	13.4057	13.4052	9.95082	7.02239	12.7588	8.0647		12.2539	1.15153		9.28197	1.76427
15.2	13.4505	13.4499	9.72921	6.40667	9.83444	7.64142		12.2099	1.24034		7.96084	1.00232
15.4	13.4085	13.408	10.0062	6.48017	9.82522	7.2279		12.2742	1.13403		7.84443	1.01365
15.6	12.6889	12.6882	9.57994	6.78975	9.66803	7.33019		11.6524	1.03622		7.92932	0.88324
15.8	13.5387	13.5381	9.67895	6.73685	11.6756	6.73506		12.2519	1.28649		8.3825	1.64655
16	12.7255	12.725	10.4051	5.99991	9.39934	6.20843		11.9519	0.773374		7.20256	1.10004
16.2	12.6586	12.6582	10.5306	6.20655	9.51169	6.46745		11.9492	0.709267		7.39523	1.06091
16.4	13.3833	13.3828	10.0555	6.01131	10.0273	6.71152		12.2739	1.10917		7.58339	1.23858
16.6	13.4092	13.4085	9.99631	6.232	9.69434	6.17533		12.2713	1.13752		7.36722	1.16368
16.8	12.3896	12.3891	10.1879	6.70362	10.2163	6.20069		11.6555	0.733821		7.70689	1.2631
17	13.1803	13.1797	11.4921	6.26062	9.86888	6.30513		12.6173	0.562643		7.47821	1.1954
17.2	12.9573	12.9567	9.88662	6.32619	9.69188	6.41844		11.9336	1.02347		7.47884	1.10684
17.4	13.3618	13.3612	10.6702	6.28	10.0787	6.0955		12.4644	0.897094		7.48473	1.29807
17.6	13.161	13.1605	10.841	6.52598	10.2839	6.02877		12.3875	0.773252		7.61289	1.34321
17.8	12.5009	12.5004	11.5106	6.35286	10.4549	7.42972		12.1706	0.330023		8.07916	1.22786
18	12.2787	12.2782	10.8303	6.55942	9.69795	7.31196		11.7957	0.482705		7.85645	0.94604
18.2	12.6633	12.6628	10.5966	6.6993	10.2282	6.9258		11.9742	0.688831		7.9511	1.14042
18.4	11.8087	11.8083	11.2476	6.65888	10.2383	7.04914		11.6215	0.186977		7.98211	1.13371
18.6	12.9465	12.946	11.2623	6.38118	9.89449	6.93624		12.3849	0.561327		7.73731	1.09043
18.8	13.2312	13.2308	10.422	6.35395	9.87847	6.60412		12.2947	0.936319		7.61218	1.13544
19	12.6365	12.636	11.6872	6.43116	9.37973	6.64489		12.3199	0.316356		7.48526	0.94924
19.2	12.9017	12.9012	10.7231	5.99908	9.0029	6.60901		12.1753	0.726142		7.20366	0.91669
19.4	13.8885	13.8881	11.343	6.59273	9.58546	7.51413		13.0398	0.848428		7.89744	0.88493
19.6	14.1756	14.1752	10.6218	6.1208	9.31322	8.0411		12.9909	1.18453		7.82504	0.92788
19.8	14.7121	14.7119	11.153	6.22281	9.42522	7.08672		13.5257	1.18632		7.57825	0.95657
20	14.5226	14.5222	11.1552	6.40412	8.81506	6.9052		13.4	1.1224		7.37479	0.73452
20.2	14.5181	14.5176	10.6084	6.54147	11.0468	6.82736		13.2147	1.30316		8.13856	1.45648
20.4	14.0413	14.041	10.547	6.57244	10.4815	6.62524		12.8764	1.16471		7.89305	1.29429
20.6	13.3577	13.3573	11.2187	6.45507	10.1424	6.30934		12.6445	0.712935		7.63561	1.25412
20.8	13.2635	13.2631	11.4475	6.53168	10.6532	6.60588		12.658	0.605255		7.93026	1.36165
21	13.4241	13.4238	11.0157	6.04567	11.0344	6.79503		12.6212	0.802741		7.95837	1.55316
21.2	13.371	13.3705	10.8128	6.41515	10.6208	6.39134		12.5181	0.852658		7.8091	1.40587
21.4	13.4076	13.4072	11.0446	6.75178	11.613	6.6139		12.6198	0.78759		8.32624	1.64388
21.6	13.796	13.7955	10.7555	6.64293	10.8235	6.4967		12.7824	1.01344		7.9877	1.41852
21.8	13.1223	13.1217	11.0739	6.94603	11.6742	6.58821		12.4393	0.682703		8.40281	1.63895
22	12.3335	12.3331	10.503	7.50544	11.9503	6.89774		11.7232	0.610103		8.78449	1.5926
22.2	11.5355	11.5351	10.5886	8.11974	12.0663	7.35691		11.2197	0.315577		9.181	1.45938
22.4	12.7389	12.7383	11.5552	7.77319	11.2045	7.27356		12.3442	0.394456		8.75043	1.2355
22.6	12.4491	12.4488	11.2507	7.50063	11.3562	7.29713		12.0495	0.399403		8.718	1.32042
22.8	12.147	12.1465	11.6694	6.90906	11.4157	6.94003		11.9876	0.159123		8.42161	1.49709
23	12.0999	12.0994	11.5357	7.33192	11.4487	7.13418		11.9117	0.187995		8.63825	1.40636
23.2	12.7645	12.7638	11.1229	7.74193	11.3924	7.35668		12.2171	0.547101		8.83034	1.28586
23.4	12.2426	12.242	11.0002	7.40487	12.6392	7.51468		11.8283	0.414012		9.18626	1.72678
23.6	11.9756	11.9751	11.0538	7.72938	11.7945	7.43052		11.6681	0.307184		8.9848	1.4075
23.8	12.8872	12.8867	10.3251	6.86966	12.7478	7.66811		12.033	0.853952		9.09518	1.84078
24	11.5567	11.5562	10.1967	7.59702	14.2569	8.15813		11.1032	0.453252		10.004	2.13261
24.2	12.2722	12.2717	10.8716	8.64783	14.398	9.15807		11.8052	0.46677		10.7346	1.83759
24.4	11.8889	11.8885	10.5558	7.10165	12.6277	8.51871		11.4444	0.444302		9.41602	1.65713
24.6	12.2525	12.2519	11.0897	7.58159	12.0316	8.16786		11.8647	0.387517		9.26035	1.39592
24.8	12.4907	12.4903	10.9337	7.66003	11.6332	7.20671		11.9716	0.518927		8.83331	1.40605
25	12.6798	12.6793	10.2897	6.75569	11.7964	7.68357		11.883	0.796605		8.74521	1.54892
25.2	11.754	11.7533	11.0541	6.95747	12.4916	8.77234		11.5204	0.233169		9.40713	1.62878
25.4	12.6065	12.606	10.2249	6.49742	11.8017	8.91004		11.8125	0.793793		9.06973	1.5333
25.6	12.8521	12.8515	10.452	6.63783	12.03	8.75444		12.0519	0.799932		9.14077	1.56854
25.8	12.6152	12.6146	10.7108	6.88093	11.1238	10.1937		11.9802	0.634712		9.3995	1.28759
26	13.2495	13.2489	11.4288	7.29754	11.6569	9.69985		12.6424	0.606802		9.55145	1.26064
26.2	13.2426	13.2421	10.668	7.22456	10.5831	9.83859		12.3842	0.858123		9.21541	1.01837
26.4	13.4626	13.4621	10.6429	7.71423	9.6889	9.85667		12.5225	0.939816		9.0866	0.68789
26.6	13.3902	13.3897	10.2926	8.09787	10.442	8.98025		12.3575	1.03245		9.17337	0.68355
26.8	12.8146	12.8141	9.82371	6.38242	9.22891	9.33443		11.8175	0.996878		8.31525	0.9669
27	12.6587	12.6582	9.9009	6.54993	9.5463	9.55347		11.7393	0.919175		8.5499	0.99999
27.2	12.8639	12.8634	9.83024	8.17703	10.129	9.70787		11.8525	1.01113		9.33798	0.59307
27.4	13.0949	13.0945	10.0614	7.40291	10.3276	9.87288		12.0836	1.01113		9.20114	0.90865
27.6	13.1992	13.1987	10.4092	7.39131	10.8354	9.90003		12.269	0.92994		9.37557	1.02822
27.8	12.9608	12.9603	10.0656	7.62626	10.5166	9.37108		11.9956	0.965002		9.1713	0.84032
28	13.1113	13.1108	9.60937	6.90286	9.92858	9.18401		11.9438	1.16722		8.67181	0.91022
28.2	12.9966	12.9961	10.1155	6.88445	9.72228	9.69897		12.0361	0.96027		8.76857	0.94208
28.4	12.7921	12.7917	9.6855	7.37383	9.49131	9.62667		11.7565	1.03548		8.8306	0.72943
28.6	12.9914	12.9908	10.3354	7.47029	9.29475	9.33125		12.1059	0.885227		8.69876	0.61433
28.8	13.455	13.4546	10.146	6.94536	9.59623	8.71166		12.3519	1.10294		8.41775	0.77922
29	12.6385	12.6381	10.7981	7.54066	9.72266	9.56581		12.0249	0.613399		8.94304	0.70265
29.2	13.2319	13.2313	11.1403	7.10495	10.5587	8.43212		12.5345	0.697098		8.69858	1.00586
29.4	12.7361	12.7355	11.4108	6.51701	10.3485	8.11154		12.2941	0.441676		8.32569	1.11123
29.6	13.2317	13.2311	11.1515	6.70835	10.4134	8.49448		12.5381	0.693315		8.53873	1.06977
29.8	12.3292	12.3287	12.0751	7.40773	10.5672	8.03615		12.2443	0.084619		8.67037	0.96562
30	12.655	12.6545	11.2143	6.80554	10.2445	8.23459		12.1746	0.480143		8.42822	0.99746
30.2	12.586	12.5855	11.4254	7.40812	9.59421	7.81496		12.1989	0.386791		8.27243	0.67124
30.4	13.4467	13.4463	11.0214	7.66395	9.38406	8.12477		12.6382	0.808361		8.39093	0.51408
30.6	13.2573	13.2569	11.1836	6.96702	10.1039	7.78787		12.5659	0.691161		8.28626	0.93919
30.8	13.3867	13.3862	11.8382	6.81702	10.6734	7.89254		12.8703	0.516073		8.46099	1.14896
31	13.3578	13.3574	11.0454	6.70077	10.8531	8.12827		12.5869	0.770733		8.56071	1.21802
31.2	13.3735	13.3729	11.5496	7.31578	10.9119	8.44509		12.7653	0.607868		8.89091	1.06176
31.4	13.4642	13.4637	10.7239	7.76944	10.1279	9.18078		12.5506	0.91335		9.02603	0.68521
31.6	12.8135	12.8128	11.021	7.09114	9.80425	9.22211		12.2158	0.597379		8.70583	0.82465
31.8	13.5146	13.5141	10.9966	7.04321	10.164	9.88678		12.6751	0.839269		9.03134	0.99728
32	14.3253	14.325	10.4368	6.66645	9.54697	9.62645		13.029	1.29612		8.61329	0.97369
32.2	13.8792	13.8788	10.8517	6.81621	9.20653	9.65898		12.8699	1.0091		8.56057	0.88191
32.4	13.6895	13.6889	11.0118	6.85863	9.40158	9.79788		12.7967	0.892455		8.68603	0.92083
32.6	14.1437	14.1432	11.0152	6.83664	9.11748	8.92558		13.1007	1.04276		8.29323	0.7304
32.8	12.6461	12.6455	11.0258	7.01256	9.17799	8.9444		12.1058	0.540013		8.37832	0.6862
33	13.2872	13.2866	11.1305	6.7738	9.71178	9.46176		12.5681	0.718801		8.64911	0.94043
33.2	13.0836	13.083	9.87893	6.94607	9.53419	9.27427		12.0152	1.06813		8.58484	0.82281
33.4	13.1412	13.1407	10.1926	6.83846	8.972	8.39353		12.1582	0.982774		8.068	0.63705
33.6	13.7431	13.7428	10.5103	7.02096	9.16315	8.62088		12.6654	1.07756		8.26833	0.64303
33.8	13.6362	13.6358	10.6808	7.10257	9.15098	9.01664		12.651	0.98507		8.4234	0.66155
34	14.4182	14.4179	10.8868	6.97028	9.36727	9.56333		13.241	1.17708		8.63362	0.8336
34.2	13.4828	13.4825	10.8562	7.07073	9.19378	9.25731		12.6072	0.875467		8.50727	0.71851
34.4	13.4169	13.4166	10.6039	6.93276	10.2077	9.68328		12.4791	0.937625		8.94125	1.01559
34.6	14.3985	14.398	10.5125	6.68516	9.50956	8.9999		13.103	1.29526		8.39821	0.86907
34.8	13.6089	13.6084	10.7008	6.84923	9.3708	9.16607		12.6394	0.969273		8.46203	0.80856
35	14.2764	14.2758	10.5431	6.72853	8.72661	9.56683		13.0318	1.24434		8.34065	0.84177
35.2	14.4413	14.4409	10.7231	6.63922	8.34019	8.49527		13.2017	1.23932		7.82489	0.59453
35.4	14.5393	14.5388	10.7042	6.69597	8.74196	8.59895		13.2608	1.27828		8.01229	0.65945
35.6	13.7423	13.7418	10.7647	7.07411	8.91343	8.35318		12.7496	0.992438		8.11357	0.54431
35.8	13.9847	13.9842	10.5042	6.86033	9.33549	8.31983		12.8244	1.16008		8.17188	0.71834
36	14.0347	14.0342	10.6763	6.78951	9.608	7.6762		12.9151	1.11938		8.02457	0.83206
36.2	13.3996	13.3991	10.7882	7.12797	10.2101	8.00136		12.529	0.870383		8.44646	0.91714
36.4	13.5469	13.5464	10.9617	6.78876	10.5037	8.36614		12.685	0.86164		8.55286	1.07647
36.6	13.8103	13.8099	11.1237	6.82139	10.2348	7.78169		12.9146	0.895467		8.27928	1.01628
36.8	13.2973	13.2969	11.1223	6.60305	9.33712	8.4996		12.5722	0.724938		8.14659	0.80875
37	13.8788	13.8784	10.3902	6.75807	9.72193	8.02488		12.7158	1.16282		8.16829	0.85859
37.2	13.6486	13.6482	10.9378	6.80564	8.66198	8.41592		12.7449	0.903526		7.96118	0.58212
37.4	13.5626	13.5623	11.2536	6.8365	9.57174	8.17651		12.7928	0.76963		8.19492	0.78965
37.6	13.3325	13.3321	10.6589	7.01517	10.8769	8.46448		12.4412	0.891137		8.78552	1.12628
37.8	13.8855	13.8851	11.0707	6.48948	10.1437	8.28422		12.9471	0.938203		8.3058	1.05494
38	13.6212	13.6208	10.6562	7.22639	9.54392	8.63043		12.6327	0.98827		8.46692	0.67399
38.2	13.9967	13.9963	11.2028	6.78642	10.3075	8.38961		13.0653	0.931211		8.49451	1.0178
38.4	13.783	13.7826	11.3452	7.18031	10.4969	8.78352		12.9703	0.81253		8.82024	0.95759
38.6	13.8508	13.8503	10.7692	7.03822	11.0415	7.88347		12.8235	1.02712		8.65439	1.21823
38.8	14.0211	14.0208	10.3941	7.80338	10.5594	8.36318		12.812	1.20896		8.90865	0.84104
39	13.9225	13.9221	10.4678	7.49348	11.333	7.93439		12.7708	1.15151		8.92029	1.21305
39.2	14.0674	14.067	10.8585	7.69936	10.7956	8.38112		12.9976	1.06955		8.95869	0.9393
39.4	13.9798	13.9793	10.3859	7.26912	9.48505	7.62185		12.7817	1.19787		8.12534	0.68744
39.6	13.27	13.2696	10.3904	7.20027	10.8223	8.15429		12.31	0.95979		8.72562	1.08391
39.8	13.9225	13.9221	10.0436	7.59097	8.94671	8.11469		12.6294	1.2929		8.21746	0.39473
40	13.7719	13.7715	10.6875	7.48749	9.55568	7.50033		12.7436	1.02806		8.18117	0.68727
40.2	14.0303	14.0298	10.5678	7.56629	9.80545	7.37271		12.876	1.15407		8.24815	0.78065
40.4	13.362	13.3616	11.1057	7.59149	9.3436	7.61021		12.6098	0.752041		8.18177	0.58094
40.6	14.1223	14.122	10.3911	8.18062	10.5077	8.03341		12.8784	1.2437		8.90723	0.80134
40.8	13.2703	13.2699	10.3467	8.27248	9.83223	8.2905		12.2956	0.974463		8.7984	0.51694
41	13.5529	13.5524	9.9482	8.18447	9.49907	7.78538		12.3512	1.20148		8.48964	0.5177
41.2	13.608	13.6076	10.1895	7.61751	9.46537	7.57962		12.4684	1.13943		8.22083	0.62237
41.4	14.0982	14.0979	10.2937	8.22957	9.50112	7.80097		12.83	1.2681		8.51055	0.51051
41.6	14.0578	14.0574	10.6237	7.82334	10.3153	7.80752		12.913	1.14463		8.64871	0.83329
41.8	14.1002	14.0998	10.4308	7.39167	9.77487	8.27443		12.877	1.22308		8.48033	0.69563
42	13.9313	13.9309	10.7879	8.01939	10.0785	7.68453		12.8834	1.04772		8.59415	0.74846
42.2	13.6773	13.677	11.3126	7.85762	10.6902	7.81362		12.889	0.788167		8.78714	0.9516
42.4	13.1524	13.152	11.2984	7.97262	11.2542	7.97712		12.5343	0.617925		9.06798	1.09311
42.6	13.4032	13.4028	10.8004	7.42421	9.63123	7.42011		12.5355	0.867544		8.15852	0.73636
42.8	13.7851	13.7848	11.2277	7.67509	9.7961	7.18273		12.9325	0.852403		8.21797	0.80176
43	13.9188	13.9184	10.8591	8.1703	9.72969	7.41136		12.8988	1.01984		8.43712	0.68241
43.2	13.9587	13.9583	11.4945	7.5977	10.1819	8.53292		13.1372	0.821347		8.77084	0.75542
43.4	13.7024	13.7021	10.5894	7.84414	10.7528	8.11385		12.6646	1.03761		8.90359	0.92787
43.6	13.7694	13.7691	10.4665	7.76179	10.9249	8.00787		12.6683	1.10092		8.89818	1.01584
43.8	13.5991	13.5987	9.95176	7.96701	11.1742	8.05831		12.3832	1.2157		9.06652	1.05419
44	13.595	13.5945	10.3961	7.44076	11.4076	7.89022		12.5285	1.06621		8.91285	1.25409
44.2	13.471	13.4707	10.2989	7.66734	11.3443	7.89861		12.4135	1.05731		8.97008	1.18899
44.4	13.7623	13.7619	9.9257	7.75794	11.6844	7.52437		12.4833	1.2788		8.98891	1.34944
44.6	13.6652	13.6648	10.5706	6.95639	10.8337	7.56172		12.6335	1.03147		8.4506	1.20429
44.8	13.9325	13.9322	11.1011	6.93586	11.7175	7.81131		12.9886	0.943748		8.82156	1.46986
45	13.6605	13.6601	10.5253	7.24391	11.4569	8.72408		12.6153	1.04502		9.14163	1.23398
45.2	13.68	13.6796	10.6562	6.96834	10.3847	8.05172		12.6719	1.00786		8.46825	1.00797
45.4	14.1027	14.1023	10.9084	6.84958	9.98851	8.17563		13.0378	1.06472		8.33791	0.90976
45.6	14.1302	14.1299	11.4614	7.22985	10.5503	6.93975		13.2405	0.889545		8.23997	1.1582
45.8	14.3066	14.3062	11.3384	7.30422	10.847	8.09607		13.3171	0.989319		8.74909	1.07356
46	14.195	14.1946	10.9209	7.4823	11.1834	7.36863		13.1035	1.09129		8.6781	1.25306
46.2	13.4209	13.4206	10.8224	7.22254	11.3348	7.71678		12.5546	0.866109		8.75806	1.29627
46.4	13.6043	13.6039	10.6266	6.91829	11.7934	7.76959		12.6116	0.992502		8.82708	1.50336
46.6	13.5443	13.5439	10.5055	7.78937	11.3285	7.71787		12.5312	1.01286		8.94526	1.19182
46.8	13.8326	13.8322	10.1302	7.64435	11.4083	7.92637		12.5984	1.23407		8.99301	1.21039
47	13.7942	13.7939	10.756	7.59361	10.6741	7.86649		12.7814	1.01269		8.71142	0.98452
47.2	14.1013	14.1009	10.6428	7.38552	12.5059	7.30059		12.9483	1.15276		9.064	1.72112
47.4	14.0263	14.026	10.5464	7.18367	11.9555	8.1291		12.8662	1.15991		9.08942	1.45879
47.6	14.0052	14.0049	11.1714	7.52486	11.7101	7.97689		13.0605	0.944547		9.07061	1.32617
47.8	13.8943	13.8941	11.5326	7.07907	10.1045	7.64356		13.107	0.78721		8.27572	0.92881
48	14.0781	14.0777	11.2051	7.13369	9.75814	7.3864		13.1203	0.957593		8.09274	0.83589
48.2	14.2638	14.2634	11.5209	7.0226	10.856	6.92457		13.3494	0.914217		8.26771	1.29444
48.4	13.6791	13.6787	11.2608	7.28254	10.5191	7.69215		12.8729	0.80603		8.49793	1.01748
48.6	13.8552	13.8548	11.236	7.52704	10.2524	7.43531		12.982	0.873		8.40491	0.92412
48.8	13.6499	13.6495	10.5483	7.7885	10.5764	7.40718		12.6159	1.03379		8.59069	0.99893
49	14.0171	14.0167	10.5797	7.22344	9.58099	7.89319		12.8712	1.14575		8.23254	0.7014
49.2	13.9553	13.9549	11.0981	7.01603	10.2947	7.63856		13.0028	0.952339		8.31642	1.00532
49.4	14.2247	14.2243	11.195	7.04357	9.76381	7.60213		13.2147	1.00984		8.1365	0.82948
49.6	13.995	13.9945	11.0455	7.8096	10.3574	7.48042		13.0116	0.983077		8.54913	0.90911
49.8	13.5664	13.566	10.7473	7.30979	10.5643	7.94636		12.6266	0.939643		8.60683	0.99586
50	13.4263	13.4259	11.3598	7.23017	11.7392	7.58806		12.7373	0.688779		8.85247	1.44705
50.2	13.613	13.6127	11.0236	7.33443	11.2597	7.35816		12.7498	0.863084		8.65077	1.30449
50.4	14.1497	14.1493	11.1563	7.26371	10.8232	7.0566		13.1518	0.997712		8.38116	1.22247
50.6	14.1804	14.18	11.2937	7.67181	11.0159	7.00727		13.2181	0.962163		8.56499	1.24037
50.8	13.8864	13.886	11.2639	7.51969	9.933	7.65637		13.0121	0.874091		8.36969	0.78265
51	13.9744	13.974	11.0607	7.69962	9.91469	8.24318		13.003	0.971176		8.61916	0.6665
51.2	13.7633	13.7629	10.3579	7.76891	11.0332	7.90236		12.628	1.13507		8.90148	1.06654
51.4	14.2984	14.298	11.0702	7.82597	11.1903	8.16006		13.2222	1.076		9.05879	1.07012
51.6	13.9069	13.9066	10.9872	7.7833	10.2785	7.30057		12.9336	0.973194		8.45412	0.92277
51.8	13.8208	13.8204	11.2563	7.67302	10.0623	7.5955		12.9659	0.854759		8.44362	0.80967
52	13.952	13.9516	11.277	7.33622	10.7084	8.4381		13.0602	0.891604		8.82757	0.99275
52.2	13.4534	13.453	11.5931	7.90996	10.3954	7.4404		12.8332	0.620034		8.58193	0.91683
52.4	14.216	14.2157	11.6209	8.04537	10.8305	7.27372		13.3509	0.865002		8.71652	1.0802
52.6	13.6461	13.6457	11.3255	7.76318	11.1284	7.79118		12.8724	0.773463		8.89424	1.11709
52.8	14.0617	14.0613	10.5903	7.80141	11.3505	7.44617		12.9044	1.15708		8.86604	1.24648
53	14.2717	14.2713	11.1137	7.87185	9.84702	7.58271		13.2189	1.05261		8.43386	0.71149
53.2	14.0569	14.0565	11.8396	8.41712	9.84535	7.94691		13.3177	0.739028		8.73646	0.57082
53.4	13.7493	13.749	11.8438	7.99259	9.91583	8.11942		13.1141	0.635114		8.67595	0.62102
53.6	13.9644	13.9641	11.3917	8.10755	10.9102	8.06053		13.1068	0.857522		9.02608	0.94214
53.8	13.308	13.3076	11.4243	7.54362	11.0398	7.88205		12.68	0.62783		8.82181	1.11327
54	14.23	14.2296	11.3226	7.75071	10.982	7.57447		13.2607	0.969057		8.76906	1.10764
54.2	14.343	14.3427	11.151	7.67058	9.74837	6.84764		13.2789	1.06393		8.08886	0.86309
54.4	14.409	14.4087	11.4107	8.13193	11.4081	7.944		13.4095	0.999363		9.16135	1.12469
54.6	13.9011	13.9008	11.2831	8.07502	9.95832	7.33983		13.0283	0.872616		8.45772	0.77974
54.8	14.1699	14.1696	10.9547	7.57588	9.61134	7.58084		13.0981	1.07169		8.25602	0.67766
55	13.7731	13.7728	11.1459	7.58062	8.83994	8.15417		12.8973	0.87567		8.19158	0.36401
55.2	14.0196	14.0193	11.6063	7.7335	9.5163	7.7844		13.2151	0.804361		8.34473	0.58597
55.4	14.1908	14.1905	11.4312	7.47885	10.0631	8.16583		13.2708	0.919801		8.56926	0.7728
55.6	13.9345	13.9342	11.6942	7.68735	10.1987	7.73605		13.1876	0.746714		8.5407	0.82912
55.8	14.2077	14.2074	11.5866	8.25396	9.46973	7.51016		13.3339	0.873637		8.41128	0.57112
56	13.0374	13.037	11.0136	7.82689	10.211	7.7958		12.3626	0.674544		8.61123	0.79994
56.2	13.6618	13.6614	10.8962	8.4239	10.6238	8.24427		12.7398	0.921806		9.09732	0.76499
56.4	13.0282	13.0277	11.0229	7.63902	10.9539	8.09988		12.3596	0.66835		8.89761	1.03673
56.6	13.5255	13.5252	11.133	7.40502	10.913	7.49881		12.7279	0.797446		8.60561	1.15401
56.8	14.1169	14.1166	11.3	7.33278	10.75	7.59241		13.1779	0.93891		8.55841	1.09837
57	13.6944	13.6939	11.0203	7.28257	10.0136	7.51742		12.8029	0.891291		8.27121	0.87385
57.2	13.5611	13.5607	11.2212	7.06988	10.488	7.84019		12.781	0.779889		8.46603	1.03516
57.4	12.7461	12.7457	11.624	7.59843	10.6849	7.89471		12.3719	0.37398		8.72601	0.98316
57.6	13.1106	13.1102	11.5401	8.00654	9.55385	7.45324		12.587	0.523432		8.33787	0.62862
57.8	13.7043	13.7039	11.7996	8.40517	10.3656	7.91413		13.0693	0.634843		8.89498	0.74886
58	13.2663	13.2659	11.3514	7.79197	9.35425	7.14739		12.6279	0.638224		8.09787	0.65517
58.2	13.1248	13.1243	11.8008	7.4862	9.8699	7.89221		12.6833	0.441264		8.41611	0.73629
58.4	13.647	13.6466	11.5902	7.76438	10.547	8.20556		12.9613	0.685516		8.83898	0.86345
58.6	13.613	13.6125	11.7682	7.4654	10.4241	7.50503		12.9979	0.61486		8.46485	0.9797
58.8	13.3345	13.334	11.3725	7.15524	10.6794	7.32691		12.6803	0.653901		8.38718	1.14717
59	13.5165	13.5162	11.8209	7.30926	11.7776	7.48873		12.9512	0.565132		8.85852	1.46044
59.2	12.9053	12.9049	11.8366	7.097	11.4127	7.38621		12.5489	0.356169		8.63197	1.39287
59.4	12.9855	12.9851	10.5454	7.62763	11.2244	7.88196		12.172	0.813298		8.91133	1.15886
59.6	12.6819	12.6815	11.3744	7.2524	12.4627	7.35842		12.246	0.43576		9.0245	1.71937
59.8	13.5043	13.5038	11.0625	7.05188	11.5077	8.25475		12.6902	0.813845		8.9381	1.33089
60	12.7521	12.7518	11.556	7.81497	10.0695	7.83409		12.3533	0.398642		8.57287	0.74836
60.2	13.7246	13.7243	11.7097	7.32289	10.5027	8.06877		13.0529	0.671597		8.63146	0.96009
60.4	12.6218	12.6213	12.1574	7.25784	9.74417	8.47517		12.4668	0.154731		8.4924	0.7178
60.6	13.2799	13.2795	11.4369	7.55641	11.2192	7.65598		12.6654	0.614275		8.81051	1.20466
60.8	13.6197	13.6193	11.2253	7.31391	11.5522	7.16331		12.8214	0.798073		8.67648	1.43853
61	13.9632	13.9628	11.9354	7.79461	12.0723	8.46256		13.2871	0.675849		9.44315	1.32864
61.2	13.1469	13.1465	12.0326	7.57869	11.6208	7.2097		12.7754	0.371387		8.80307	1.4129
61.4	12.786	12.7856	11.7955	7.55623	10.3413	7.78403		12.4557	0.33011		8.56053	0.89283
61.6	12.815	12.8145	11.8378	8.04876	8.69619	7.22589		12.4891	0.325638		7.99028	0.42544
61.8	13.1258	13.1253	11.6606	7.47035	8.61802	8.21874		12.6372	0.488332		8.10237	0.33637
62	13.1114	13.1109	11.2619	7.06809	7.77133	7.97646		12.4947	0.616401		7.60529	0.27505
62.2	13.2521	13.2516	12.2417	7.45596	8.59773	8.17246		12.9151	0.336718		8.07539	0.33316
62.4	13.6037	13.6032	12.5576	7.36216	8.53132	7.07927		13.2549	0.348613		7.65759	0.44444
62.6	13.4014	13.4009	11.467	7.32682	9.20862	7.28529		12.7564	0.644719		7.94024	0.6343
62.8	13.7238	13.7235	11.007	8.19849	8.41337	7.24474		12.8181	0.90554		7.9522	0.35913
63	12.1507	12.1501	11.7504	7.71055	8.40856	8.10871		12.0171	0.133322		8.07594	0.20216
63.2	13.4619	13.4614	12.132	8.30478	7.51337	7.88681		13.0184	0.443211		7.90165	0.22858
63.4	12.7473	12.7468	11.8912	7.66836	7.70624	7.09282		12.4618	0.285296		7.48914	0.19846
63.6	12.858	12.8575	11.5828	8.62518	7.1287	7.57204		12.4328	0.424985		7.77531	0.44379
63.8	13.3985	13.398	11.4263	8.53453	6.73916	7.33865		12.7409	0.65733		7.53745	0.52773
64	13.0258	13.0254	11.2482	8.7582	7.18591	7.35463		12.4331	0.592448		7.76624	0.49836
64.2	12.7432	12.7427	11.3346	8.71462	7.30702	7.88596		12.2735	0.469465		7.9692	0.40846
64.4	13.2018	13.2013	12.1438	7.85124	6.98845	7.58196		12.849	0.352577		7.47388	0.25486
64.6	12.9181	12.9177	12.1799	7.76982	6.9884	8.10939		12.6719	0.246003		7.62254	0.33187
64.8	12.819	12.8185	11.793	7.45132	7.31109	7.57858		12.4768	0.341933		7.44699	0.07725
65	13.005	13.0046	11.3004	8.03694	7.27267	7.95768		12.4367	0.568133		7.75576	0.24263
65.2	13.7639	13.7635	11.7277	7.75317	7.1385	8.02051		13.085	0.678675		7.63739	0.26111
65.4	13.9008	13.9004	11.9715	7.25104	6.934	7.4877		13.2575	0.643036		7.22425	0.1604
65.6	13.3821	13.3818	11.5885	6.75019	7.19645	7.59211		12.7841	0.597821		7.17958	0.24319
65.8	13.1924	13.1921	11.6189	6.33638	7.34678	7.70702		12.6678	0.524453		7.13006	0.41024
66	13.5605	13.5601	12.1023	6.85949	7.39888	7.94273		13.0743	0.486002		7.40037	0.31271
66.2	13.5841	13.5837	11.9078	6.98772	6.88598	7.38439		13.0252	0.558701		7.08603	0.15204
66.4	13.5201	13.5198	11.9368	6.90724	6.97719	8.16221		12.9922	0.527718		7.34888	0.40717
66.6	14.116	14.1157	11.773	7.26926	7.10741	7.74149		13.3349	0.780977		7.37272	0.19021
66.8	13.7863	13.7859	11.4423	7.09016	7.09107	7.95401		13.0048	0.781282		7.37841	0.2878
67	13.3813	13.3808	10.9959	7.41051	6.92819	7.98275		12.586	0.795055		7.44048	0.30479
67.2	13.9583	13.9579	11.3719	7.64899	6.67632	7.18907		13.0961	0.862065		7.17146	0.28092
67.4	14.0655	14.0651	11.2516	6.79033	6.59632	7.8909		13.1274	0.937901		7.09252	0.4031
67.6	13.5764	13.5761	11.2088	6.6658	6.58698	7.80329		12.7871	0.789158		7.01869	0.39296
67.8	14.1194	14.1191	11.5983	7.57997	6.55243	8.25754		13.2789	0.840325		7.46331	0.49567
68	13.5763	13.5758	11.1256	7.30831	6.68521	7.82108		12.7592	0.816824		7.27153	0.32841
68.2	13.2339	13.2336	11.3915	6.81234	7.04941	7.20551		12.6197	0.614071		7.02242	0.1143
68.4	13.6015	13.6012	11.6526	7.17646	7.17245	7.87224		12.9518	0.649596		7.40705	0.2326
68.6	13.3833	13.3829	11.8039	7.3259	7.00015	7.99221		12.8567	0.526421		7.43942	0.29195
68.8	12.6334	12.633	11.7152	7.24031	6.93315	7.54222		12.3272	0.305977		7.23856	0.17583
69	12.8928	12.8924	11.7101	7.71859	6.82588	8.00026		12.4984	0.394155		7.51491	0.35398
69.2	12.8535	12.8531	12.0302	7.28027	7.57488	7.83766		12.579	0.274384		7.56427	0.16099
69.4	14.0637	14.0632	12.3777	6.91541	6.96273	7.98999		13.5015	0.56191		7.28938	0.35057
69.6	13.377	13.3766	11.8955	7.19749	6.98578	8.10818		12.883	0.493759		7.43048	0.34431
69.8	13.1769	13.1764	11.8174	7.57851	7.40515	7.60781		12.7236	0.453084		7.53049	0.06324
70	13.4728	13.4724	12.6264	7.64807	7.5227	7.50863		13.1905	0.282051		7.5598	0.04432
70.2	13.1398	13.1394	12.4349	7.78059	7.70933	7.69547		12.9047	0.23492		7.72846	0.02637
70.4	13.7762	13.7758	12.4604	7.71855	7.51129	8.34351		13.3374	0.438507		7.85778	0.25012
70.6	12.9015	12.9012	12.3244	7.11351	7.15851	7.49447		12.709	0.192308		7.2555	0.12019
70.8	13.4661	13.4657	12.1136	7.50685	7.24482	8.33187		13.0152	0.450762		7.69452	0.32753
71	13.5466	13.5463	11.9273	7.6233	7.30513	8.22264		13.0067	0.539731		7.71702	0.26897
71.2	13.9892	13.9889	12.285	7.46819	7.07039	7.94917		13.421	0.568015		7.49592	0.25406
71.4	14.5557	14.5554	11.8233	7.10331	7.5351	7.5249		13.6448	0.910733		7.38777	0.14226
71.6	13.9775	13.9772	11.6035	7.62446	8.00483	8.03705		13.1861	0.791271		7.88878	0.13249
71.8	13.9725	13.9721	11.4564	7.30419	7.19151	7.96931		13.1337	0.83863		7.48833	0.24268
72	13.8427	13.8424	11.9621	7.71449	7.29834	7.75883		13.2157	0.626824		7.59056	0.14667
72.2	13.5944	13.594	11.8181	7.57283	7.06071	8.19168		13.0022	0.592044		7.60841	0.32697
72.4	13.6915	13.6912	11.7212	7.22304	6.7757	8.29843		13.0346	0.656738		7.43239	0.45186
72.6	14.7642	14.7639	11.5481	7.34546	6.60147	8.61681		13.692	1.07199		7.52124	0.58838
72.8	14.6362	14.6359	12.2902	7.36039	6.94398	8.9088		13.8541	0.781957		7.73772	0.59775
73	14.4042	14.4039	11.5858	7.13409	7.34728	8.43053		13.4646	0.939403		7.6373	0.40136
73.2	14.625	14.6247	12.2121	7.35264	7.61425	7.76055		13.8206	0.804252		7.57581	0.11931
73.4	14.7101	14.7098	12.1179	7.30469	7.30893	7.82135		13.846	0.864019		7.47832	0.17152
73.6	14.0324	14.032	12.0583	7.12271	6.8623	7.78614		13.3742	0.657971		7.25705	0.27502
73.8	13.5714	13.5711	11.7174	7.17166	6.71333	7.99764		12.9533	0.61793		7.29421	0.37578
74	14.2874	14.287	12.4989	7.07941	7.01166	7.82372		13.6911	0.596105		7.30493	0.26013
74.2	13.6623	13.6619	12.4758	6.83869	7.19722	7.42469		13.2667	0.395445		7.15353	0.17057
74.4	14.0311	14.0307	12.1171	7.89807	7.567	8.75798		13.393	0.637914		8.07435	0.35492
74.6	14.1446	14.1443	11.1585	7.87872	7.113	7.72807		13.1491	0.9953		7.57326	0.23421
74.8	14.0524	14.0521	11.3115	7.99572	6.99823	7.48786		13.1387	0.913583		7.49394	0.28797
75	14.1939	14.1936	11.6719	7.47864	7.5495	7.39378		13.3531	0.840617		7.47397	0.04501
75.2	13.8061	13.8058	11.6581	7.30652	7.68324	7.66819		13.09	0.715958		7.55265	0.12314
75.4	14.1962	14.1959	11.8384	7.5256	6.71016	7.53969		13.4102	0.785876		7.25848	0.27419
75.6	13.8891	13.8887	11.7772	8.61685	7.14601	7.54209		13.185	0.703885		7.76831	0.4394
75.8	14.1248	14.1244	11.8762	7.72495	6.96783	7.47931		13.3752	0.749466		7.3907	0.22301
76	14.0687	14.0684	11.7737	7.84392	6.71101	7.12232		13.3036	0.764954		7.22575	0.33111
76.2	14.3951	14.3947	11.0564	7.35263	7.11052	7.3807		13.282	1.11284		7.28128	0.08576
76.4	14.2433	14.2429	11.3536	7.21586	7.08895	7.13161		13.2799	0.963146		7.14547	0.03729
76.6	13.6562	13.6558	11.1109	7.75432	6.6944	7.51773		12.8076	0.848377		7.32215	0.32122
76.8	13.9362	13.9358	12.0789	7.54242	6.60849	7.4646		13.317	0.619031		7.20517	0.29918
77	14.1186	14.1182	12.1038	7.44583	6.99719	7.52767		13.4469	0.671511		7.32356	0.16489
77.2	14.014	14.0137	12.0101	7.38437	7.02061	7.49686		13.3459	0.667921		7.30061	0.14372
77.4	13.9045	13.9042	11.3305	8.02229	6.47824	8.08991		13.0464	0.857937		7.53014	0.52632
77.6	13.8135	13.8132	11.8252	7.37533	7.02986	7.63646		13.1506	0.662713		7.34722	0.17567
77.8	12.9928	12.9925	11.9508	7.84197	7.08936	7.8606		12.6454	0.347304		7.59731	0.25403
78	13.8551	13.8547	11.9608	7.74925	7.37542	7.69139		13.2235	0.63137		7.60535	0.11617
78.2	13.1364	13.1361	11.8913	8.35267	7.01058	8.02804		12.7212	0.41498		7.7971	0.40427
78.4	13.5671	13.5668	11.9385	8.28597	6.73232	8.13875		13.0241	0.542818		7.71902	0.49517
78.6	13.9486	13.9483	11.0588	7.88521	6.73471	7.69592		12.9852	0.963205		7.43861	0.35617
78.8	12.8184	12.8181	11.4156	8.22086	7.2645	7.40845		12.3507	0.467552		7.63127	0.29771
79	13.5865	13.5861	11.634	7.43329	6.8409	7.58475		12.9356	0.650758		7.28631	0.22696
79.2	12.8782	12.8779	12.6075	7.43337	6.62767	7.64716		12.7879	0.0901887		7.23606	0.3104
79.4	13.6254	13.6251	11.7362	7.5288	6.99975	7.72979		12.9956	0.629684		7.41945	0.21772
79.6	13.5159	13.5156	12.0705	7.83767	6.82885	7.03812		13.034	0.481733		7.23488	0.30739
79.8	14.5192	14.5189	11.9729	8.26512	6.56217	7.05288		13.6703	0.848703		7.29339	0.5061
80	12.9717	12.9714	11.3744	7.36316	6.77391	7.5102		12.4392	0.532361		7.21576	0.22496
80.2	14.0026	14.0022	11.7145	7.88797	7.12716	7.54667		13.2398	0.762616		7.5206	0.22001
80.4	13.0995	13.0991	11.485	7.83969	7.4888	7.69472		12.5612	0.53808		7.6744	0.1018
80.6	13.5776	13.5772	11.6259	8.03009	7.19728	7.41517		12.9269	0.6505		7.54751	0.24935
80.8	13.4063	13.406	11.6385	7.60412	6.81806	7.34935		12.8169	0.589229		7.25718	0.23155
81	12.3296	12.3291	11.8328	8.00418	7.3183	7.01182		12.1638	0.165521		7.44477	0.29337
81.2	13.0246	13.0242	11.8001	7.92459	7.43722	7.03589		12.6163	0.408108		7.4659	0.25695
81.4	12.654	12.6536	11.6992	7.69662	7.4094	6.691		12.3356	0.318214		7.26567	0.29906
81.6	13.3115	13.3111	11.5049	7.8881	7.5981	7.13584		12.7092	0.602124		7.54068	0.21905
81.8	12.6695	12.669	11.5863	8.43254	8.26917	6.92347		12.3083	0.360986		7.87506	0.47812
82	13.2412	13.2408	11.4512	7.95133	7.8856	6.51006		12.6444	0.5966		7.449	0.46985
82.2	13.0805	13.08	11.5648	8.30965	8.22454	7.07098		12.5751	0.505151		7.86839	0.39946
82.4	13.536	13.5356	12.034	8.23663	7.86285	7.1957		13.0352	0.500597		7.76506	0.30444
82.6	13.4682	13.4678	11.1814	7.72829	9.23114	7.75489		12.7058	0.762207		8.23811	0.49657
82.8	13.9489	13.9485	11.5971	8.05248	8.86627	7.15499		13.1649	0.783866		8.02458	0.4942
83	13.4079	13.4074	12.3146	8.58598	7.58937	7.91497		13.0433	0.364335		8.03011	0.2934
83.2	13.7371	13.7367	11.507	7.99942	8.07259	7.29699		12.9936	0.743289		7.78967	0.24724
83.4	13.7054	13.705	12.2428	8.0199	7.64048	7.45233		13.2177	0.48746		7.70424	0.16691
83.6	13.3156	13.3152	11.2465	8.01092	7.87696	7.52192		12.6258	0.689625		7.80327	0.14589
83.8	14.2301	14.2297	11.3295	8.09716	7.566	7.70737		13.2631	0.966812		7.79018	0.15882
84	13.9181	13.9176	11.5528	7.84039	7.81179	7.64824		13.1295	0.788365		7.7668	0.05986
84.2	14.6223	14.6219	11.4267	8.20029	8.0648	7.87717		13.557	1.06514		8.04742	0.09368
84.4	13.9807	13.9802	11.3521	8.0195	8.09912	7.53282		13.1044	0.876123		7.88382	0.17699
84.6	14.1179	14.1174	11.7586	8.23022	8.07484	7.08521		13.3313	0.786348		7.79676	0.35859
84.8	14.2812	14.2808	12.1637	7.95729	7.66719	7.30658		13.5752	0.705758		7.64369	0.18821
85	13.3722	13.3717	11.7331	7.99355	7.18383	7.60223		12.8257	0.54631		7.5932	0.23379
85.2	13.495	13.4946	11.6604	8.30378	7.36903	7.64139		12.8833	0.611489		7.7714	0.27756
85.4	13.9139	13.9134	11.0258	7.8522	7.03679	7.77816		12.951	0.962612		7.55572	0.26034
85.6	14.6399	14.6395	12.1431	8.44699	7.1013	7.66321		13.8075	0.832193		7.73717	0.39022
85.8	14.377	14.3765	11.5709	8.1667	7.62442	7.74832		13.4415	0.935297		7.84648	0.16406
86	14.4554	14.455	12.0302	7.90993	7.13683	7.33165		13.6468	0.808316		7.45947	0.23215
86.2	14.1541	14.1538	11.8659	8.9363	7.40208	7.41428		13.3913	0.76266		7.91755	0.50939
86.4	14.0486	14.0481	12.4189	8.25819	7.00876	7.56173		13.5052	0.54315		7.60956	0.36147
86.6	14.1194	14.1191	11.6122	8.2468	7.01779	8.08222		13.2836	0.835692		7.78227	0.38518
86.8	14.821	14.8206	11.8646	8.28191	6.97229	8.69782		13.8354	0.98538		7.98401	0.51991
87	13.8269	13.8265	12.671	8.26403	7.27652	7.37659		13.4415	0.385223		7.63905	0.31382
87.2	13.9974	13.997	11.7066	7.97204	8.13019	7.37833		13.2337	0.763562		7.82686	0.22886
87.4	14.3265	14.3262	12.1273	8.16564	7.87502	7.39939		13.5933	0.73302		7.81335	0.22334
87.6	14.8909	14.8905	11.9129	8.22212	8.78391	7.3957		13.8981	0.992586		8.13391	0.40316
87.8	14.5733	14.5729	12.1382	8.68116	8.12431	8.31252		13.7615	0.811612		8.37266	0.16354
88	14.3344	14.3341	12.3551	8.3187	7.31972	7.46654		13.6746	0.659703		7.70165	0.31142
88.2	14.1134	14.113	11.872	8.53252	7.53093	7.4891		13.3662	0.747063		7.85085	0.34105
88.4	14.2069	14.2066	11.8837	8.73757	7.18885	7.92256		13.4324	0.77435		7.94966	0.44728
88.6	14.1703	14.17	11.9841	8.91054	7.45831	7.59718		13.4415	0.728683		7.98868	0.46267
88.8	14.7933	14.7929	11.5585	8.50548	7.64037	7.65176		13.7149	1.07821		7.93254	0.28649
89	14.3456	14.3453	11.586	9.27883	7.33863	7.03271		13.4256	0.919828		7.88339	0.70329
89.2	13.7592	13.7587	11.6599	8.81829	7.71804	7.3812		13.0593	0.699679		7.97251	0.43393
89.4	14.3784	14.378	11.4212	9.02527	7.44725	8.30165		13.3925	0.985661		8.25806	0.45606
89.6	14.6086	14.6083	11.6612	9.23673	7.26796	7.79041		13.626	0.982396		8.09837	0.58882
89.8	14.5613	14.5608	11.5651	9.00666	7.48298	7.83016		13.5624	0.998649		8.1066	0.46106
90	14.4501	14.4497	11.9546	8.86173	7.62406	8.19198		13.6181	0.831776		8.22593	0.35769
90.2	14.3845	14.3841	11.3209	8.17684	7.26662	7.95056		13.3632	1.02114		7.79801	0.27361
90.4	14.3955	14.395	11.6685	8.71271	7.30519	7.87514		13.4863	0.908925		7.96435	0.40875
90.6	14.4581	14.4576	11.2794	9.32645	7.45113	7.86545		13.3984	1.05948		8.21435	0.56877
90.8	14.1093	14.1089	11.207	9.06202	6.91507	7.34121		13.1418	0.967359		7.77277	0.65626
91	14.0839	14.0835	11.4039	8.58144	7.15663	7.62821		13.1904	0.893293		7.78876	0.41907
91.2	15.0001	14.9997	10.9167	9.21325	7.5965	7.59378		13.6388	1.36106		8.13451	0.53937
91.4	14.941	14.9405	10.7289	9.47927	7.05488	8.05293		13.5368	1.40395		8.19569	0.70349
91.6	14.6714	14.6711	11.6865	8.44781	7.21017	8.15735		13.6763	0.994929		7.93844	0.37367
91.8	14.6014	14.601	11.5334	8.74263	7.13358	7.7719		13.5786	1.02259		7.8827	0.46779
92	14.5653	14.5648	11.5866	8.08319	7.37741	7.25356		13.5722	0.992834		7.57139	0.25839
92.2	13.2354	13.2351	11.4722	7.94054	8.12464	7.27672		12.6476	0.587667		7.78063	0.2575
92.4	13.7636	13.7632	11.2723	7.81934	7.61978	8.03287		12.933	0.830362		7.824	0.11927
92.6	13.1029	13.1025	12.0649	8.22267	7.56553	7.6106		12.7568	0.345923		7.7996	0.21194
92.8	13.7733	13.7729	11.7928	8.08567	7.79034	8.10196		13.113	0.660092		7.99266	0.10127
93	14.1493	14.1489	11.6254	8.67896	7.3018	8.13629		13.3079	0.841212		8.03902	0.40052
93.2	14.0686	14.0682	12.0882	8.13795	8.14528	7.98898		13.4083	0.660072		8.09074	0.05092
93.4	14.5266	14.5262	12.0742	8.36024	7.15673	7.75213		13.709	0.817369		7.75637	0.34743
93.6	14.3439	14.3435	12.2427	8.512	7.2686	7.91038		13.6434	0.700324		7.89699	0.359
93.8	13.7403	13.7399	11.4717	8.63726	7.52833	8.09854		12.984	0.756138		8.08804	0.32016
94	14.041	14.0407	11.4435	8.15541	7.54945	7.72265		13.1751	0.865772		7.80917	0.18019
94.2	14.6431	14.6427	11.1754	8.08501	7.59345	7.99078		13.487	1.15584		7.88975	0.15062
94.4	15.1167	15.1162	11.6849	8.27859	6.98897	7.85173		13.9726	1.14384		7.70643	0.3793
94.6	15.0533	15.0529	11.6786	8.62466	6.80786	7.95185		13.9283	1.12484		7.79479	0.53031
94.8	15.1996	15.1992	11.3578	8.79665	7.29851	7.75007		13.9189	1.28052		7.94841	0.4437
95	15.4023	15.4019	11.2603	8.13686	7.55391	7.48052		14.0215	1.38058		7.72376	0.20763
95.2	14.6192	14.6188	11.4421	8.34388	7.19147	7.49388		13.56	1.05897		7.67641	0.34496
95.4	14.9444	14.944	11.2317	7.96951	7.41139	7.6573		13.7067	1.2375		7.6794	0.16149
95.6	14.8867	14.8862	11.8883	8.69294	7.48203	7.61541		13.8871	0.999398		7.93013	0.38334
95.8	15.1081	15.1076	11.5478	8.02215	7.35046	7.49499		13.9212	1.18669		7.62254	0.20412
96	14.6339	14.6335	12.3524	8.46865	7.29072	7.6199		13.8733	0.760439		7.79309	0.35089
96.2	14.3886	14.3881	10.9163	8.53532	6.82945	7.80044		13.231	1.15736		7.72174	0.49401
96.4	14.4893	14.4889	11.0683	8.20223	7.52092	7.80651		13.3488	1.14026		7.84322	0.19753
96.6	14.7005	14.7001	11.9439	8.09969	7.70154	8.07777		13.7815	0.9188		7.95967	0.12922
96.8	14.8755	14.8752	11.2543	8.23875	7.93716	7.42071		13.6684	1.20701		7.86554	0.23885
97	14.2007	14.2003	11.2278	8.54121	7.86852	8.03531		13.2096	0.990911		8.14835	0.20225
97.2	14.5472	14.5468	11.6739	8.15394	7.36738	8.02177		13.5893	0.957706		7.84769	0.24317
97.4	14.4539	14.4536	11.1591	8.64264	7.7777	9.00692		13.3555	1.0982		8.47575	0.36452
97.6	15.121	15.1206	11.1911	8.40442	7.50973	8.06154		13.8109	1.30991		7.99189	0.26061
97.8	13.9897	13.9893	11.0282	8.10459	7.317	8.20975		13.0024	0.987101		7.87711	0.2817
98	14.0313	14.0309	11.4119	7.92829	7.52806	8.14256		13.1581	0.873086		7.8663	0.18008
98.2	14.1381	14.1377	11.5839	7.93109	7.64807	8.36974		13.2866	0.851349		7.98297	0.20994
98.4	14.2089	14.2086	11.4878	8.61559	7.59462	8.19127		13.3018	0.907005		8.13383	0.29612
98.6	13.9204	13.92	11.4967	8.76492	7.23959	8.21028		13.1124	0.807823		8.0716	0.44575
98.8	14.0233	14.023	11.1286	8.35301	7.52587	7.52761		13.0583	0.96485		7.80216	0.27543
99	14.2948	14.2944	11.389	8.65927	7.18759	8.2915		13.3261	0.968551		8.04612	0.4422
99.2	14.2634	14.2631	11.6479	8.18169	7.73229	8.36417		13.3915	0.871785		8.09271	0.18776
99.4	13.8779	13.8776	11.2294	8.23276	7.09902	8.67501		12.995	0.882783		8.00226	0.46932
99.6	13.9052	13.9048	11.6598	8.41092	8.09488	7.99334		13.1566	0.748405		8.16638	0.12573
99.8	13.8756	13.8751	11.5493	8.53731	7.91029	8.53427		13.1	0.775335		8.32729	0.2085
100	13.9606	13.9601	11.2751	8.31843	7.61418	8.0468		13.0653	0.895097		7.99314	0.20506

## Sheet: Cross Correlation Dark
	260	261	262	263	264	265	266	267	268	269	270	271	272	273	274	275	276	277	278	279	280	281	282	283	284	285	286	287	VVD1	VVD1	VVD1	VVD1	VVD1	VVD1	VVD1	VVD1	VVD1	VVD1	VVD1	VVD1	VVD1	VVD1	VVD1	VVD1	VVD1	VVD1	VVD1	VVD1	VVD1
260	1	0.98019	0.96362	0.84784	0.67583	0.49944	0.45455	0.49803	0.4143	0.34906	0.3503	0.34566	0.31499	0.32551	0.2744	0.20177	0.24743	0.17036	0.20253	0.21083	0.27208	0.36694	0.39321	0.46498	0.47806	0.59205	0.51525	0.5056	0.59287	0.62499	0.51932	0.51667	0.434	0.43526	0.36585	0.1071	0.18332	0.16442	0.20173	0.25723	0.33497	0.37661	0.12452	0.21203	0.1471	0.03326	0.32174	0.24559	0.02583
261	0.98019	1	0.99052	0.91056	0.77283	0.59802	0.54734	0.59281	0.48109	0.40797	0.37062	0.35297	0.35502	0.3518	0.32382	0.2891	0.36673	0.30002	0.33182	0.32648	0.36617	0.45681	0.46288	0.5163	0.53654	0.66468	0.63635	0.62728	0.68779	0.72061	0.62713	0.62516	0.55492	0.56136	0.48989	0.23321	0.28963	0.26643	0.28524	0.34309	0.4053	0.41493	0.04205	0.09885	0.27515	0.10528	0.19588	0.12378	0.08645
262	0.96362	0.99052	1	0.94107	0.81261	0.65387	0.60044	0.64487	0.53744	0.47067	0.42504	0.40347	0.41483	0.40778	0.38451	0.35529	0.42395	0.3563	0.38721	0.38932	0.43004	0.51549	0.5198	0.564	0.58145	0.69622	0.66076	0.64874	0.69099	0.74159	0.65808	0.65221	0.57368	0.57675	0.49108	0.23431	0.26955	0.24504	0.25337	0.30989	0.36385	0.3661	0.06006	0.0846	0.3137	0.15761	0.14064	0.05481	0.16171
263	0.84784	0.91056	0.94107	1	0.94025	0.83019	0.76032	0.81165	0.7066	0.64039	0.54502	0.5064	0.5734	0.54349	0.56001	0.58821	0.66975	0.61787	0.64164	0.64129	0.65602	0.71746	0.69607	0.6914	0.71881	0.80999	0.81689	0.81177	0.78649	0.85461	0.81855	0.81562	0.72799	0.71897	0.60035	0.3581	0.32437	0.28875	0.24117	0.30425	0.31435	0.24212	0.03778	0.04299	0.4703	0.38492	0.11198	0.2172	0.43282
264	0.67583	0.77283	0.81261	0.94025	1	0.95607	0.90684	0.94202	0.84001	0.78109	0.65068	0.59875	0.70293	0.65718	0.70393	0.76694	0.85084	0.805	0.82941	0.82903	0.83055	0.87353	0.83713	0.809	0.84052	0.91209	0.92503	0.9159	0.86482	0.93386	0.91617	0.91737	0.84483	0.81949	0.66923	0.43003	0.34847	0.30701	0.22758	0.28767	0.27953	0.17839	0.00703	0.15307	0.63514	0.58004	0.30557	0.42973	0.64827
265	0.49944	0.59802	0.65387	0.83019	0.95607	1	0.96847	0.98411	0.93479	0.89815	0.77944	0.72819	0.83434	0.78682	0.83883	0.89016	0.9199	0.86652	0.88889	0.91657	0.93358	0.95575	0.93119	0.88973	0.91502	0.92798	0.87706	0.86487	0.79942	0.88738	0.88789	0.88558	0.79212	0.74153	0.54809	0.31735	0.18984	0.14566	0.0411	0.09564	0.07654	0.02365	0.12284	0.1075	0.62724	0.61972	0.38188	0.54488	0.78267
266	0.45455	0.54734	0.60044	0.76032	0.90684	0.96847	1	0.97758	0.93367	0.89697	0.79555	0.7518	0.83799	0.80277	0.8378	0.85631	0.87447	0.8064	0.83407	0.86896	0.90526	0.93717	0.92724	0.91106	0.92233	0.93415	0.84202	0.8283	0.8136	0.88178	0.87274	0.85431	0.75498	0.70314	0.5049	0.25126	0.13795	0.09789	0.00531	0.05628	0.06482	0.000583	0.1583	0.03958	0.58807	0.5606	0.29437	0.46029	0.72208
267	0.49803	0.59281	0.64487	0.81165	0.94202	0.98411	0.97758	1	0.95596	0.92022	0.81124	0.76315	0.85919	0.81683	0.85776	0.89348	0.91715	0.85323	0.87895	0.91058	0.94076	0.96983	0.95249	0.92656	0.94532	0.95974	0.88161	0.86859	0.82672	0.90343	0.89572	0.88918	0.78939	0.73498	0.53293	0.2799	0.15911	0.11269	0.01653	0.07236	0.0685	0.01583	0.15946	0.06025	0.60955	0.5908	0.33168	0.50225	0.76253
268	0.4143	0.48109	0.53744	0.7066	0.84001	0.93479	0.93367	0.95596	1	0.99071	0.94068	0.9087	0.96664	0.93993	0.95564	0.93602	0.87175	0.78317	0.80739	0.88194	0.95516	0.97553	0.994	0.97629	0.98413	0.93243	0.73641	0.72162	0.68997	0.78767	0.77589	0.76644	0.61383	0.53123	0.28641	0.02538	0.11398	0.16274	0.26145	0.20457	0.2066	0.26111	0.40461	0.153	0.4284	0.44694	0.22954	0.44946	0.75817
269	0.34906	0.40797	0.47067	0.64039	0.78109	0.89815	0.89697	0.92022	0.99071	1	0.9637	0.93537	0.98529	0.9621	0.97444	0.94244	0.84734	0.75504	0.77885	0.86715	0.95019	0.96233	0.98795	0.96997	0.97263	0.89553	0.6673	0.64824	0.61095	0.71729	0.70608	0.69545	0.54042	0.44942	0.19395	0.0555	0.20572	0.25369	0.35024	0.2989	0.3048	0.34913	0.4664	0.19529	0.3844	0.41908	0.22617	0.45903	0.76893
270	0.3503	0.37062	0.42504	0.54502	0.65068	0.77944	0.79555	0.81124	0.94068	0.9637	1	0.99501	0.9871	0.98994	0.96102	0.8545	0.68984	0.57006	0.59623	0.71671	0.84694	0.8684	0.93468	0.95074	0.93698	0.82506	0.48678	0.46543	0.47528	0.58547	0.54805	0.53244	0.33755	0.231	0.03989	0.30696	0.43254	0.4758	0.54736	0.49658	0.47411	0.45812	0.66334	0.43151	0.15839	0.18351	0.00305	0.26147	0.61443
271	0.34566	0.35297	0.40347	0.5064	0.59875	0.72819	0.7518	0.76315	0.9087	0.93537	0.99501	1	0.97309	0.98576	0.9435	0.8132	0.62841	0.501	0.52753	0.65623	0.8005	0.82545	0.90362	0.93142	0.91119	0.78916	0.41936	0.39868	0.42709	0.53601	0.48882	0.47115	0.26856	0.15778	0.11336	0.38291	0.49743	0.53957	0.6018	0.5515	0.51907	0.48429	0.71807	0.50401	0.08023	0.10065	0.07426	0.18819	0.55046
272	0.31499	0.35502	0.41483	0.5734	0.70293	0.83434	0.83799	0.85919	0.96664	0.98529	0.9871	0.97309	1	0.99135	0.98712	0.92136	0.78337	0.68003	0.70152	0.80814	0.91361	0.92423	0.96701	0.95903	0.9529	0.84649	0.56055	0.54417	0.52401	0.63544	0.61167	0.60253	0.43014	0.32625	0.05818	0.19137	0.33808	0.38455	0.47731	0.42566	0.42436	0.44921	0.58288	0.31478	0.25987	0.30284	0.13428	0.38352	0.71106
273	0.32551	0.3518	0.40778	0.54349	0.65718	0.78682	0.80277	0.81683	0.93993	0.9621	0.98994	0.98576	0.99135	1	0.97923	0.88165	0.71962	0.60462	0.62695	0.74423	0.86755	0.88445	0.93991	0.94838	0.93594	0.82234	0.49731	0.4811	0.48806	0.59628	0.55302	0.54025	0.35933	0.25266	0.01762	0.27757	0.40921	0.45346	0.53375	0.48238	0.46661	0.46774	0.64553	0.40002	0.17755	0.20865	0.03783	0.29366	0.63696
274	0.2744	0.32382	0.38451	0.56001	0.70393	0.83883	0.8378	0.85776	0.95564	0.97444	0.96102	0.9435	0.98712	0.97923	1	0.94611	0.81473	0.71871	0.73592	0.83815	0.92909	0.93169	0.95935	0.93939	0.93802	0.83242	0.57438	0.56065	0.52619	0.63789	0.61063	0.60474	0.45098	0.35266	0.09235	0.14045	0.29668	0.34434	0.44449	0.39688	0.40513	0.45219	0.53922	0.25305	0.29825	0.35095	0.19861	0.43839	0.74426
275	0.20177	0.2891	0.35529	0.58821	0.76694	0.89016	0.85631	0.89348	0.93602	0.94244	0.8545	0.8132	0.92136	0.88165	0.94611	1	0.94363	0.89346	0.89971	0.95844	0.98691	0.96759	0.94647	0.87776	0.89851	0.8221	0.70359	0.69797	0.59388	0.69862	0.71228	0.72259	0.6226	0.53785	0.30883	0.13064	0.05511	0.10574	0.24007	0.19181	0.24538	0.37332	0.3067	0.02866	0.50407	0.58886	0.46835	0.66677	0.89371
276	0.24743	0.36673	0.42395	0.66975	0.85084	0.9199	0.87447	0.91715	0.87175	0.84734	0.68984	0.62841	0.78337	0.71962	0.81473	0.94363	1	0.98521	0.9892	0.99284	0.96441	0.94896	0.88593	0.79784	0.83541	0.82965	0.86067	0.86122	0.7373	0.81289	0.84463	0.86053	0.81555	0.76282	0.58759	0.43142	0.26088	0.21149	0.07205	0.1205	0.05385	0.12338	0.02544	0.28096	0.69261	0.75729	0.61013	0.74648	0.90672
277	0.17036	0.30002	0.3563	0.61787	0.805	0.86652	0.8064	0.85323	0.78317	0.75504	0.57006	0.501	0.68003	0.60462	0.71871	0.89346	0.98521	1	0.99628	0.97598	0.91443	0.88606	0.80085	0.69025	0.73615	0.74232	0.84919	0.85543	0.7019	0.76743	0.81942	0.84236	0.82961	0.78897	0.64572	0.5393	0.36359	0.31808	0.16881	0.21138	0.12348	0.08671	0.10178	0.41297	0.7395	0.82359	0.71522	0.8172	0.91688
278	0.20253	0.33182	0.38721	0.64164	0.82941	0.88889	0.83407	0.87895	0.80739	0.77885	0.59623	0.52753	0.70152	0.62695	0.73592	0.89971	0.9892	0.99628	1	0.98262	0.92787	0.90513	0.82429	0.72182	0.76504	0.77597	0.86988	0.87242	0.72828	0.79208	0.84129	0.86162	0.84291	0.80103	0.6515	0.52875	0.35845	0.31289	0.1701	0.21428	0.13332	0.06426	0.08898	0.3909	0.74612	0.81763	0.6875	0.79512	0.91096
279	0.21083	0.32648	0.38932	0.64129	0.82903	0.91657	0.86896	0.91058	0.88194	0.86715	0.71671	0.65623	0.80814	0.74423	0.83815	0.95844	0.99284	0.97598	0.98262	1	0.97614	0.95399	0.89568	0.80356	0.83869	0.81552	0.82733	0.8245	0.6908	0.77414	0.81235	0.82694	0.77348	0.71653	0.53129	0.38303	0.20122	0.15259	0.01222	0.05749	0.01489	0.18656	0.06478	0.25838	0.67429	0.75185	0.61968	0.76631	0.92945
280	0.27208	0.36617	0.43004	0.65602	0.83055	0.93358	0.90526	0.94076	0.95516	0.95019	0.84694	0.8005	0.91361	0.86755	0.92909	0.98691	0.96441	0.91443	0.92787	0.97614	1	0.99092	0.96567	0.90346	0.92433	0.87526	0.78025	0.77197	0.67948	0.77397	0.78838	0.79341	0.69704	0.62026	0.39735	0.19994	0.0269	0.02302	0.15	0.09995	0.14469	0.26795	0.24789	0.06324	0.56192	0.62347	0.46251	0.65181	0.88559
281	0.36694	0.45681	0.51549	0.71746	0.87353	0.95575	0.93717	0.96983	0.97553	0.96233	0.8684	0.82545	0.92423	0.88445	0.93169	0.96759	0.94896	0.88606	0.90513	0.95399	0.99092	1	0.98467	0.94244	0.95862	0.9258	0.81216	0.80124	0.73585	0.82411	0.82349	0.82339	0.71677	0.64263	0.41794	0.18766	0.0353	0.01508	0.12815	0.07384	0.09773	0.19909	0.26272	0.01432	0.55039	0.58178	0.37844	0.57124	0.83247
282	0.39321	0.46288	0.51981	0.69607	0.83713	0.93119	0.92724	0.95249	0.994	0.98795	0.93468	0.90362	0.96701	0.93991	0.95935	0.94647	0.88593	0.80085	0.82429	0.89568	0.96567	0.98467	1	0.98039	0.98484	0.93104	0.74074	0.72571	0.69117	0.78507	0.77195	0.76599	0.62391	0.53923	0.2951	0.03888	0.10315	0.15338	0.25327	0.1972	0.2004	0.26054	0.39277	0.13538	0.4409	0.46369	0.24855	0.46611	0.76961
283	0.46498	0.5163	0.564	0.6914	0.809	0.88973	0.91106	0.92656	0.97629	0.96997	0.95074	0.93142	0.95903	0.94838	0.93939	0.87776	0.79784	0.69025	0.72182	0.80356	0.90346	0.94244	0.98039	1	0.99232	0.94581	0.69722	0.67661	0.69651	0.77803	0.73477	0.71909	0.56849	0.48042	0.2325	0.06258	0.1705	0.21771	0.28854	0.23154	0.19831	0.20669	0.45814	0.25583	0.36026	0.34012	0.0824	0.30793	0.6492
284	0.47806	0.53654	0.58145	0.71881	0.84052	0.91502	0.92233	0.94532	0.98413	0.97263	0.93698	0.91119	0.9529	0.93594	0.93802	0.89851	0.83541	0.73615	0.76504	0.83869	0.92433	0.95862	0.98484	0.99232	1	0.96401	0.74604	0.72725	0.73141	0.81009	0.76742	0.75902	0.61886	0.53394	0.29002	0.000765	0.11235	0.16211	0.24068	0.18085	0.15974	0.19153	0.41624	0.19935	0.40496	0.38986	0.13854	0.35816	0.68674
285	0.59205	0.66468	0.69622	0.80999	0.91209	0.92798	0.93415	0.95974	0.93243	0.89553	0.82506	0.78916	0.84649	0.82234	0.83242	0.8221	0.82965	0.74232	0.77597	0.81552	0.87526	0.9258	0.93104	0.94581	0.96401	1	0.86693	0.84835	0.86807	0.91276	0.863	0.85185	0.74601	0.68681	0.4811	0.18001	0.10175	0.05356	0.00991	0.05208	0.08354	0.04114	0.23852	0.07854	0.50543	0.44534	0.14231	0.31877	0.62398
286	0.51525	0.63635	0.66076	0.81689	0.92503	0.87706	0.84202	0.88161	0.73641	0.6673	0.48678	0.41936	0.56055	0.49731	0.57438	0.70359	0.86067	0.84919	0.86988	0.82733	0.78025	0.81216	0.74074	0.69722	0.74604	0.86693	1	0.99461	0.93325	0.93803	0.94336	0.94478	0.93648	0.93102	0.82753	0.63177	0.55414	0.51108	0.42575	0.47853	0.45758	0.3129	0.21987	0.36634	0.75384	0.71292	0.45182	0.51538	0.66103
287	0.5056	0.62728	0.64874	0.81177	0.9159	0.86487	0.8283	0.86859	0.72162	0.64824	0.46543	0.39868	0.54417	0.4811	0.56065	0.69797	0.86122	0.85543	0.87242	0.8245	0.77197	0.80124	0.72571	0.67661	0.72725	0.84835	0.99461	1	0.93794	0.93762	0.9465	0.95077	0.94359	0.93703	0.8384	0.64842	0.5705	0.52736	0.43535	0.49026	0.46542	0.30742	0.22858	0.37609	0.74409	0.70913	0.45967	0.51758	0.65435
VVD1	0.59287	0.68779	0.69099	0.78649	0.86482	0.79942	0.8136	0.82672	0.68997	0.61095	0.47528	0.42709	0.52401	0.48806	0.52619	0.59388	0.7373	0.7019	0.72828	0.6908	0.67948	0.73585	0.69117	0.69651	0.73141	0.86807	0.93325	0.93794	1	0.96466	0.91585	0.89683	0.87491	0.87018	0.76628	0.51448	0.49112	0.45123	0.39991	0.45686	0.4864	0.39806	0.13818	0.19877	0.61837	0.51962	0.2059	0.27129	0.46299
VVD1	0.62499	0.72061	0.74159	0.85461	0.93386	0.88738	0.88178	0.90343	0.78767	0.71729	0.58547	0.53601	0.63544	0.59628	0.63789	0.69862	0.81289	0.76743	0.79208	0.77413	0.77397	0.82411	0.78507	0.77803	0.81009	0.91276	0.93803	0.93762	0.96466	1	0.95061	0.93271	0.88453	0.86306	0.72838	0.46884	0.41615	0.37256	0.3097	0.36984	0.38463	0.29159	0.0429	0.15988	0.63507	0.54589	0.24094	0.3432	0.55962
VVD1	0.51932	0.62713	0.65808	0.81855	0.91617	0.88789	0.87274	0.89572	0.77589	0.70608	0.54806	0.48882	0.61167	0.55302	0.61063	0.71228	0.84463	0.81942	0.84129	0.81235	0.78838	0.82349	0.77195	0.73477	0.76742	0.863	0.94336	0.9465	0.91585	0.95061	1	0.97761	0.91221	0.88792	0.76205	0.54326	0.46017	0.4158	0.32901	0.38745	0.37708	0.25833	0.12175	0.25814	0.6878	0.64684	0.37599	0.4602	0.63986
VVD1	0.51667	0.62516	0.65221	0.81562	0.91737	0.88558	0.85431	0.88918	0.76644	0.69545	0.53244	0.47115	0.60253	0.54025	0.60474	0.72259	0.86053	0.84236	0.86162	0.82694	0.79341	0.82339	0.76599	0.71909	0.75902	0.85185	0.94478	0.95077	0.89683	0.93271	0.97761	1	0.93671	0.90686	0.77939	0.56849	0.48229	0.43564	0.344	0.40622	0.38752	0.25452	0.14812	0.29911	0.70776	0.67251	0.41672	0.49821	0.66275
VVD1	0.434	0.55492	0.57368	0.72799	0.84483	0.79212	0.75498	0.78939	0.61383	0.54042	0.33755	0.26856	0.43014	0.35933	0.45098	0.6226	0.81555	0.82961	0.84291	0.77348	0.69704	0.71678	0.62391	0.56849	0.61886	0.74601	0.93648	0.94359	0.87491	0.88453	0.91221	0.93671	1	0.97952	0.90349	0.74375	0.67027	0.62988	0.54473	0.5852	0.559	0.40456	0.37171	0.51231	0.83167	0.77364	0.53711	0.56453	0.64067
VVD1	0.43526	0.56136	0.57675	0.71897	0.81949	0.74153	0.70314	0.73498	0.53123	0.44942	0.231	0.15778	0.32625	0.25266	0.35266	0.53785	0.76282	0.78897	0.80103	0.71653	0.62026	0.64263	0.53923	0.48042	0.53394	0.68681	0.93102	0.93703	0.87018	0.86306	0.88792	0.90686	0.97952	1	0.95769	0.81972	0.76173	0.72618	0.64997	0.6885	0.65872	0.49894	0.47662	0.58683	0.85072	0.78367	0.54867	0.5436	0.58312
VVD1	0.36585	0.48989	0.49108	0.60035	0.66923	0.54809	0.5049	0.53293	0.28641	0.19395	0.03989	0.11336	0.05818	0.01762	0.09235	0.30883	0.58759	0.64572	0.6515	0.53129	0.39735	0.41794	0.2951	0.2325	0.29002	0.4811	0.82753	0.8384	0.76628	0.72838	0.76205	0.77939	0.90349	0.95769	1	0.93263	0.91109	0.88519	0.82782	0.85211	0.81735	0.64767	0.67411	0.7184	0.82601	0.74898	0.55352	0.47479	0.41864
VVD1	0.1071	0.23321	0.23431	0.3581	0.43003	0.31735	0.25126	0.2799	0.02538	0.0555	0.30696	0.38291	0.19137	0.27757	0.14045	0.13064	0.43142	0.5393	0.52875	0.38303	0.19994	0.18766	0.03888	0.06258	0.000765	0.18001	0.63177	0.64842	0.51448	0.46884	0.54326	0.56849	0.74375	0.81972	0.93263	1	0.96945	0.95569	0.88943	0.89177	0.81459	0.61081	0.84192	0.89039	0.78743	0.76619	0.69468	0.55122	0.36284
VVD1	0.18332	0.28963	0.26955	0.32437	0.34847	0.18984	0.13795	0.15911	0.11398	0.20572	0.43254	0.49743	0.33808	0.40921	0.29668	0.05511	0.26088	0.36359	0.35845	0.20122	0.0269	0.0353	0.10315	0.1705	0.11235	0.10175	0.55414	0.5705	0.49112	0.41615	0.46017	0.48229	0.67027	0.76173	0.91109	0.96945	1	0.99437	0.96713	0.9683	0.92208	0.76118	0.88125	0.83459	0.69023	0.61627	0.51819	0.34419	0.14757
VVD1	0.16442	0.26643	0.24504	0.28875	0.30701	0.14566	0.09789	0.11269	0.16274	0.25369	0.4758	0.53957	0.38455	0.45346	0.34434	0.10574	0.21149	0.31808	0.31289	0.15259	0.02302	0.01508	0.15338	0.21771	0.16211	0.05356	0.51108	0.52736	0.45123	0.37256	0.4158	0.43564	0.62988	0.72618	0.88519	0.95569	0.99437	1	0.97743	0.97192	0.9265	0.77363	0.896	0.83233	0.66432	0.58708	0.49756	0.31487	0.1058
VVD1	0.20173	0.28524	0.25337	0.24117	0.22758	0.0411	0.00531	0.01653	0.26145	0.35024	0.54736	0.6018	0.47731	0.53375	0.44449	0.24007	0.07205	0.16881	0.1701	0.01222	0.15	0.12815	0.25327	0.28854	0.24068	0.00991	0.42575	0.43535	0.39991	0.3097	0.32901	0.344	0.54473	0.64997	0.82782	0.88943	0.96713	0.97743	1	0.98613	0.96413	0.85758	0.89212	0.76827	0.58742	0.46787	0.35687	0.16029	0.04826
VVD1	0.25723	0.34309	0.30989	0.30425	0.28767	0.09564	0.05628	0.07236	0.20457	0.2989	0.49658	0.5515	0.42566	0.48238	0.39688	0.19181	0.1205	0.21138	0.21428	0.05749	0.09995	0.07384	0.1972	0.23154	0.18085	0.05208	0.47853	0.49026	0.45686	0.36984	0.38745	0.40622	0.5852	0.6885	0.85211	0.89177	0.9683	0.97192	0.98613	1	0.97501	0.86358	0.86867	0.7475	0.59233	0.47219	0.34594	0.15909	0.02563
VVD1	0.33497	0.4053	0.36385	0.31435	0.27953	0.07654	0.06482	0.0685	0.2066	0.3048	0.47411	0.51907	0.42436	0.46661	0.40513	0.24538	0.05385	0.12348	0.13332	0.01489	0.14469	0.09773	0.2004	0.19831	0.15974	0.08354	0.45758	0.46542	0.4864	0.38463	0.37708	0.38752	0.559	0.65872	0.81735	0.81459	0.92208	0.9265	0.96413	0.97501	1	0.94038	0.82922	0.65399	0.54679	0.38147	0.20295	0.02217	0.12607
VVD1	0.37661	0.41493	0.3661	0.24212	0.17839	0.02365	0.000583	0.01583	0.26111	0.34913	0.45812	0.48429	0.44921	0.46774	0.45219	0.37332	0.12338	0.08671	0.06426	0.18656	0.26795	0.19909	0.26054	0.20669	0.19153	0.04114	0.3129	0.30742	0.39806	0.29159	0.25833	0.25452	0.40456	0.49894	0.64767	0.61081	0.76118	0.77363	0.85758	0.86358	0.94038	1	0.73823	0.47953	0.42853	0.20894	0.02393	0.19257	0.29546
VVD1	0.12452	0.04205	0.06006	0.03778	0.00703	0.12284	0.1583	0.15946	0.40461	0.4664	0.66334	0.71807	0.58288	0.64553	0.53922	0.3067	0.02544	0.10178	0.08898	0.06478	0.24789	0.26272	0.39277	0.45814	0.41624	0.23852	0.21987	0.22858	0.13818	0.0429	0.12175	0.14812	0.37171	0.47662	0.67411	0.84192	0.88125	0.896	0.89212	0.86867	0.82922	0.73823	1	0.90749	0.59565	0.54471	0.53616	0.31037	0.01056
VVD1	0.21203	0.09885	0.0846	0.04299	0.15307	0.1075	0.03958	0.06025	0.153	0.19529	0.43151	0.50401	0.31478	0.40002	0.25305	0.02866	0.28096	0.41297	0.3909	0.25838	0.06324	0.01432	0.13538	0.25583	0.19935	0.07854	0.36634	0.37609	0.19877	0.15988	0.25814	0.29911	0.51231	0.58683	0.7184	0.89039	0.83459	0.83233	0.76827	0.7475	0.65399	0.47953	0.90749	1	0.77394	0.79046	0.82525	0.66262	0.3812
VVD1	0.1471	0.27515	0.3137	0.4703	0.63514	0.62724	0.58807	0.60955	0.4284	0.3844	0.15839	0.08023	0.25987	0.17755	0.29825	0.50407	0.69261	0.7395	0.74612	0.67429	0.56192	0.55039	0.4409	0.36026	0.40496	0.50543	0.75384	0.74409	0.61837	0.63507	0.6878	0.70776	0.83167	0.85072	0.82601	0.78743	0.69023	0.66432	0.58742	0.59233	0.54679	0.42853	0.59565	0.77394	1	0.94571	0.7657	0.75066	0.70608
VVD1	0.03326	0.10528	0.15761	0.38492	0.58004	0.61972	0.5606	0.5908	0.44694	0.41908	0.18351	0.10065	0.30284	0.20865	0.35095	0.58886	0.7573	0.82359	0.81763	0.75185	0.62347	0.58178	0.46369	0.34012	0.38986	0.44534	0.71292	0.70913	0.51962	0.54589	0.64684	0.67251	0.77364	0.78367	0.74898	0.76619	0.61627	0.58708	0.46787	0.47219	0.38147	0.20894	0.54471	0.79046	0.94571	1	0.90982	0.89995	0.82967
VVD1	0.32174	0.19588	0.14064	0.11198	0.30557	0.38188	0.29437	0.33168	0.22954	0.22617	0.00305	0.07426	0.13428	0.03783	0.19861	0.46835	0.61013	0.71522	0.6875	0.61968	0.46251	0.37844	0.24855	0.0824	0.13854	0.14231	0.45182	0.45967	0.2059	0.24094	0.37599	0.41672	0.53711	0.54867	0.55352	0.69468	0.51819	0.49756	0.35687	0.34594	0.20295	0.02393	0.53616	0.82525	0.7657	0.90982	1	0.9603	0.78408
VVD1	0.24559	0.12378	0.05481	0.2172	0.42973	0.54488	0.46029	0.50225	0.44946	0.45903	0.26147	0.18819	0.38352	0.29366	0.43839	0.66677	0.74648	0.8172	0.79512	0.76631	0.65181	0.57124	0.46611	0.30793	0.35816	0.31877	0.51538	0.51758	0.27129	0.3432	0.4602	0.49821	0.56453	0.5436	0.47479	0.55122	0.34419	0.31487	0.16029	0.15909	0.02217	0.19257	0.31037	0.66262	0.75066	0.89995	0.9603	1	0.9164
VVD1	0.02583	0.08645	0.16171	0.43282	0.64827	0.78267	0.72208	0.76253	0.75817	0.76893	0.61443	0.55046	0.71106	0.63696	0.74426	0.89371	0.90672	0.91688	0.91096	0.92945	0.88559	0.83247	0.76961	0.6492	0.68674	0.62398	0.66103	0.65435	0.46299	0.55962	0.63986	0.66275	0.64067	0.58312	0.41864	0.36284	0.14757	0.1058	0.04826	0.02563	0.12607	0.29546	0.01056	0.3812	0.70608	0.82967	0.78408	0.9164	1
VVD1	0.22738	0.11243	0.03803	0.25261	0.47123	0.61489	0.53655	0.57992	0.57454	0.59263	0.42475	0.35833	0.53608	0.45355	0.58284	0.7759	0.80575	0.8536	0.8338	0.83313	0.75142	0.67248	0.58964	0.43706	0.48118	0.40825	0.52495	0.52587	0.28616	0.37165	0.4873	0.51884	0.52871	0.48524	0.37031	0.41066	0.18475	0.14989	0.01699	0.00618	0.14128	0.34916	0.11981	0.49578	0.6506	0.83185	0.88957	0.97154	0.95892
VVD1	0.32264	0.21536	0.14175	0.14819	0.36016	0.51202	0.42489	0.46998	0.47575	0.50183	0.34036	0.27708	0.45351	0.37228	0.50524	0.70577	0.72889	0.78961	0.76327	0.76049	0.66918	0.57783	0.49155	0.32849	0.37317	0.28605	0.41829	0.42306	0.16723	0.25448	0.37922	0.41628	0.4382	0.39747	0.30206	0.3857	0.15816	0.12742	0.03965	0.03695	0.1856	0.40407	0.12989	0.50936	0.58626	0.78731	0.90159	0.96911	0.91435
VVD1	0.22838	0.13982	0.05943	0.21988	0.4329	0.61665	0.54784	0.58986	0.65477	0.69449	0.58348	0.53307	0.6718	0.60788	0.70786	0.83611	0.78298	0.79786	0.78114	0.82457	0.79259	0.71389	0.66675	0.53226	0.56369	0.43678	0.42499	0.42246	0.20604	0.31808	0.41374	0.44187	0.39962	0.32696	0.16087	0.16625	0.0694	0.10717	0.26846	0.25428	0.37783	0.55104	0.13667	0.26493	0.48983	0.6793	0.74972	0.89102	0.94604
VVD1	0.13414	0.05675	0.02293	0.28793	0.49299	0.68321	0.62924	0.66753	0.75897	0.79971	0.71906	0.6768	0.78981	0.73747	0.81436	0.89592	0.80663	0.79229	0.78316	0.84975	0.85394	0.78996	0.76742	0.65647	0.67965	0.54066	0.44816	0.44171	0.26037	0.37905	0.45429	0.47556	0.39093	0.30406	0.10107	0.04987	0.17985	0.22099	0.37587	0.35177	0.45269	0.59374	0.28028	0.11158	0.42755	0.60244	0.63001	0.80869	0.93502
VVD1	0.12374	0.06782	0.00966	0.2521	0.44038	0.64533	0.60356	0.63683	0.77016	0.82092	0.78376	0.75513	0.83464	0.7981	0.85041	0.88311	0.74464	0.70898	0.70198	0.79332	0.83071	0.77201	0.77551	0.68449	0.69792	0.53262	0.36031	0.35255	0.20095	0.32649	0.38416	0.39961	0.28289	0.1827	0.04208	0.1159	0.33758	0.3782	0.52224	0.49589	0.58088	0.6885	0.43297	0.05369	0.29068	0.46468	0.49521	0.70025	0.86795
VVD1	0.19321	0.11222	0.03343	0.24498	0.4533	0.6449	0.58908	0.62531	0.71291	0.75245	0.66352	0.62	0.7421	0.68709	0.77229	0.87064	0.79226	0.79043	0.77651	0.83457	0.82482	0.75363	0.7223	0.59964	0.62588	0.48668	0.42547	0.4237	0.2286	0.34095	0.42839	0.45006	0.3751	0.29358	0.10586	0.08148	0.15236	0.19144	0.35431	0.33235	0.44505	0.60413	0.24142	0.15179	0.41789	0.61226	0.66827	0.83082	0.92968
VVD1	0.28545	0.19166	0.11453	0.17705	0.39079	0.57059	0.50007	0.53885	0.59503	0.63086	0.50897	0.45661	0.60509	0.53719	0.64671	0.79526	0.76022	0.7902	0.76906	0.79973	0.75024	0.6651	0.60764	0.46116	0.49665	0.37492	0.40567	0.40765	0.17826	0.27847	0.38914	0.41787	0.38445	0.32022	0.1765	0.21276	0.02349	0.05856	0.2283	0.21481	0.35137	0.54488	0.07944	0.31268	0.47459	0.68772	0.78705	0.9042	0.9272
VVD1	0.31088	0.21081	0.13669	0.15984	0.37503	0.5451	0.47079	0.50911	0.54658	0.57733	0.43971	0.38328	0.54351	0.47038	0.58942	0.75943	0.74853	0.79196	0.76812	0.78481	0.71757	0.62948	0.56026	0.40541	0.4455	0.33754	0.41222	0.41678	0.17702	0.26781	0.38783	0.41746	0.4015	0.34651	0.22345	0.28091	0.04738	0.01367	0.15835	0.14643	0.2906	0.50003	0.00246	0.38199	0.5006	0.71864	0.82952	0.92416	0.91716
VVD1	0.36814	0.25856	0.18979	0.10641	0.31605	0.46237	0.37853	0.41707	0.41657	0.43822	0.27184	0.20902	0.38958	0.30753	0.44433	0.65694	0.69447	0.76616	0.73624	0.72353	0.61997	0.52518	0.43263	0.26271	0.30961	0.22813	0.39208	0.40211	0.14332	0.21793	0.35486	0.38797	0.41458	0.38086	0.30582	0.41311	0.18979	0.16151	0.00979	0.00442	0.16251	0.39483	0.16821	0.53175	0.55335	0.77185	0.90842	0.95456	0.87628
VVD1	0.42212	0.31468	0.24785	0.0418	0.24636	0.38921	0.3026	0.34137	0.33473	0.35857	0.18945	0.12715	0.30957	0.22669	0.36767	0.59034	0.63668	0.71932	0.68613	0.66546	0.5508	0.45067	0.35251	0.17847	0.2253	0.14602	0.33502	0.34655	0.0811	0.14923	0.29281	0.32907	0.37471	0.34805	0.29364	0.42946	0.21144	0.18714	0.02028	0.01863	0.14406	0.37793	0.21951	0.57231	0.54148	0.7627	0.92321	0.95	0.83723
VVD1	0.46745	0.35555	0.30001	0.03493	0.14977	0.25157	0.15936	0.195	0.13624	0.14767	0.04783	0.11451	0.08086	0.00848	0.14615	0.40769	0.51427	0.62791	0.59072	0.53314	0.37891	0.27765	0.15562	0.02411	0.02853	0.00847	0.28502	0.30008	0.02611	0.06773	0.22375	0.26171	0.36453	0.36828	0.38216	0.57459	0.38673	0.37145	0.22063	0.20628	0.0391	0.20513	0.43435	0.7332	0.57982	0.78145	0.96199	0.92267	0.72264
VVD1	0.45664	0.34559	0.28364	0.01082	0.18274	0.3016	0.21016	0.24714	0.20754	0.22603	0.03902	0.02705	0.1646	0.07684	0.22731	0.47657	0.55988	0.66332	0.62774	0.58319	0.44314	0.3414	0.22772	0.04962	0.09843	0.04478	0.2999	0.31219	0.03993	0.09166	0.24236	0.27998	0.36205	0.3554	0.34416	0.51817	0.31899	0.30236	0.14635	0.13494	0.03127	0.27018	0.35891	0.67839	0.56998	0.77999	0.95367	0.9387	0.76901
VVD1	0.4909	0.38139	0.32614	0.07504	0.10265	0.19961	0.10857	0.14101	0.07594	0.08947	0.10643	0.17317	0.01983	0.06893	0.0847	0.34877	0.46145	0.5815	0.54382	0.48007	0.32092	0.21991	0.09656	0.08075	0.03191	0.06221	0.24598	0.25941	0.01153	0.02166	0.17887	0.21482	0.32581	0.33734	0.36766	0.57608	0.39873	0.3891	0.24592	0.22701	0.06252	0.17288	0.47551	0.75335	0.56702	0.76599	0.95302	0.89765	0.67805
VVD1	0.51941	0.41919	0.38678	0.19273	0.06438	0.02943	0.11521	0.09277	0.21134	0.21452	0.41658	0.47921	0.29578	0.3806	0.22923	0.05007	0.22386	0.37152	0.33233	0.22891	0.03762	0.05366	0.19109	0.35583	0.30635	0.28048	0.12809	0.1455	0.10354	0.11483	0.04604	0.07637	0.24057	0.29196	0.41172	0.67764	0.5607	0.56466	0.45814	0.42606	0.27374	0.05293	0.68984	0.85706	0.51411	0.67645	0.87847	0.73874	0.4293
VVD1	0.50092	0.42704	0.42212	0.31936	0.26214	0.293	0.36347	0.35461	0.50883	0.52541	0.70279	0.75164	0.60445	0.67299	0.54418	0.28514	0.07612	0.08353	0.0456	0.08463	0.28451	0.35759	0.49116	0.62234	0.57934	0.50411	0.0474	0.02702	0.21962	0.27544	0.13597	0.1128	0.08866	0.17503	0.37457	0.67521	0.63805	0.6585	0.60497	0.56127	0.43938	0.26363	0.8174	0.84798	0.36824	0.47441	0.68074	0.46992	0.09847
VVD1	0.3694	0.29351	0.3001	0.23108	0.19953	0.27651	0.33771	0.33233	0.52789	0.56408	0.75113	0.80139	0.65825	0.72511	0.60289	0.34661	0.09754	0.05835	0.0271	0.12111	0.3237	0.37524	0.51198	0.62311	0.58005	0.45824	0.02609	0.04634	0.11074	0.18538	0.06404	0.0476	0.16463	0.26769	0.48657	0.75556	0.75441	0.77567	0.74286	0.70464	0.60566	0.44359	0.89654	0.86904	0.40774	0.46252	0.60868	0.37764	0.01426
VVD1	0.4947	0.43354	0.43558	0.36525	0.33527	0.38084	0.44584	0.44281	0.59736	0.61488	0.7751	0.81713	0.68858	0.74958	0.63289	0.39144	0.18547	0.0262	0.06321	0.19508	0.38984	0.45752	0.5832	0.70212	0.66355	0.58295	0.12989	0.10923	0.28125	0.34249	0.21118	0.1933	0.00795	0.10427	0.32307	0.63362	0.61948	0.64471	0.60939	0.56276	0.4506	0.29694	0.81846	0.80859	0.29391	0.38383	0.59526	0.37042	0.01189
VVD1	0.5099	0.42675	0.4127	0.27625	0.19999	0.20958	0.29152	0.27609	0.41744	0.43077	0.6177	0.67188	0.51023	0.58606	0.44749	0.17693	0.02129	0.18065	0.14038	0.01799	0.18261	0.26533	0.40149	0.55087	0.50261	0.44701	0.00148	0.02338	0.1948	0.22901	0.0797	0.05204	0.13117	0.20903	0.38376	0.68143	0.61381	0.6278	0.55301	0.51453	0.37448	0.17575	0.77228	0.8546	0.40757	0.53897	0.75639	0.56788	0.21131
VVD1	0.39617	0.29864	0.2872	0.15038	0.07454	0.11282	0.19473	0.17687	0.35463	0.38494	0.5961	0.65774	0.48228	0.56421	0.42083	0.13582	0.10044	0.25786	0.22271	0.08572	0.12246	0.19235	0.33814	0.48371	0.43045	0.34103	0.13642	0.15857	0.05053	0.08954	0.0524	0.08034	0.26795	0.35218	0.52659	0.79038	0.73202	0.74216	0.66778	0.63719	0.50476	0.2974	0.83739	0.90774	0.50765	0.60959	0.77225	0.57933	0.23946
VVD1	0.30176	0.18929	0.17404	0.02459	0.06488	0.0181	0.05963	0.04259	0.242	0.28263	0.51453	0.58387	0.3955	0.48356	0.33547	0.0438	0.21295	0.36218	0.33308	0.19216	0.01542	0.075	0.2254	0.36807	0.31315	0.20468	0.27754	0.29678	0.09277	0.05525	0.1934	0.21701	0.39967	0.48342	0.64099	0.86453	0.80234	0.80715	0.72767	0.70502	0.5795	0.36742	0.85962	0.9379	0.61383	0.69664	0.80349	0.62234	0.31447
VVD1	0.26643	0.16822	0.16706	0.07038	0.01854	0.10056	0.16245	0.15622	0.37552	0.42443	0.64168	0.70355	0.53885	0.61705	0.48506	0.21308	0.06133	0.21022	0.18524	0.03245	0.17331	0.21731	0.36137	0.47861	0.42994	0.29158	0.20547	0.22362	0.05876	0.00408	0.12077	0.1361	0.33309	0.43452	0.63033	0.85708	0.84021	0.85222	0.80434	0.77655	0.67552	0.49575	0.91529	0.91365	0.542	0.58631	0.67625	0.46147	0.13535
VVD1	0.16299	0.0635	0.06642	0.0097	0.05047	0.05337	0.10134	0.10257	0.34207	0.40279	0.62094	0.68336	0.52681	0.60198	0.47993	0.22329	0.06703	0.20421	0.18701	0.03011	0.16693	0.19195	0.33033	0.42834	0.38321	0.21876	0.27295	0.28678	0.15065	0.0789	0.19232	0.19933	0.38847	0.49587	0.69148	0.88102	0.88489	0.8961	0.86173	0.83906	0.76062	0.60229	0.93245	0.89318	0.56877	0.57729	0.61064	0.39472	0.09616
VVD1	0.0792	0.01904	0.01147	0.0705	0.09831	0.02396	0.06382	0.06885	0.31932	0.38918	0.6036	0.66526	0.51746	0.58904	0.47752	0.23441	0.06394	0.19231	0.1805	0.02162	0.16682	0.17792	0.31056	0.39463	0.35033	0.16698	0.31656	0.32908	0.2157	0.13729	0.23988	0.24279	0.42211	0.53048	0.72361	0.88445	0.90517	0.91628	0.89119	0.87371	0.80989	0.66401	0.92407	0.85587	0.56174	0.54727	0.54483	0.32988	0.05607
VVD1	0.21432	0.29461	0.2714	0.25535	0.23499	0.06159	0.05647	0.03926	0.22283	0.31477	0.49112	0.54119	0.44288	0.49239	0.42755	0.26294	0.03122	0.11221	0.11993	0.02736	0.16486	0.12552	0.22336	0.24364	0.21149	0.01542	0.41439	0.41864	0.40394	0.31139	0.35507	0.34111	0.47671	0.5853	0.75634	0.80053	0.88184	0.89031	0.90843	0.90795	0.91034	0.8376	0.81758	0.65292	0.50231	0.39554	0.25882	0.06788	0.09808
VVD1	0.40718	0.51641	0.52492	0.60979	0.66804	0.56583	0.56669	0.55875	0.34865	0.25911	0.07296	0.0092	0.12916	0.06963	0.13481	0.2721	0.50562	0.53226	0.55225	0.45886	0.37372	0.42115	0.34553	0.31592	0.35064	0.52898	0.78685	0.78395	0.75917	0.71929	0.75846	0.7401	0.76431	0.81749	0.83726	0.73406	0.73064	0.71022	0.66875	0.7036	0.70418	0.60372	0.50774	0.48691	0.65959	0.58923	0.35057	0.29339	0.31799
VVD1	0.699	0.73825	0.72057	0.65344	0.60613	0.45527	0.50533	0.48222	0.3239	0.2354	0.17529	0.15384	0.15448	0.14968	0.11995	0.09048	0.23548	0.18463	0.2269	0.18295	0.20211	0.30712	0.31005	0.3882	0.38891	0.56965	0.61435	0.60053	0.73047	0.68483	0.62656	0.5925	0.5459	0.58351	0.57074	0.33996	0.43569	0.42249	0.46725	0.51172	0.61033	0.66088	0.18028	0.01118	0.31722	0.12755	0.21954	0.22703	0.06169
VVD1	0.41691	0.42215	0.37155	0.21728	0.09972	0.10281	0.05029	0.08851	0.28492	0.37067	0.41824	0.42581	0.44849	0.44394	0.4755	0.47406	0.27246	0.26129	0.23406	0.33268	0.36963	0.27993	0.29713	0.21618	0.21818	8.2e-05	0.19344	0.18928	0.32377	0.21251	0.18066	0.15064	0.20927	0.29851	0.44241	0.38214	0.55636	0.57269	0.67114	0.67918	0.77218	0.84599	0.48954	0.17193	0.109	0.08423	0.29745	0.44941	0.49024
VVD1	0.18904	0.21282	0.16679	0.05344	0.03982	0.23276	0.20641	0.24119	0.4648	0.5458	0.63999	0.66048	0.63858	0.65506	0.64544	0.56309	0.31567	0.25101	0.2392	0.37016	0.46918	0.41462	0.47143	0.44162	0.42845	0.20916	0.11648	0.11963	0.17801	0.05871	0.07679	0.05894	0.17896	0.28616	0.48729	0.54356	0.69274	0.71508	0.79118	0.78016	0.82087	0.83154	0.69627	0.4129	0.17365	0.03801	0.0709	0.28378	0.4495
VVD1	0.00955	0.05197	0.02226	0.0018	0.0436	0.20675	0.22451	0.24046	0.48152	0.55628	0.71559	0.75753	0.66736	0.71444	0.64817	0.46703	0.18243	0.0691	0.07426	0.22908	0.38991	0.37713	0.47988	0.51973	0.48657	0.2843	0.15977	0.17158	0.12417	0.01863	0.09264	0.09101	0.25275	0.36832	0.58967	0.73873	0.82407	0.84472	0.86766	0.84782	0.81999	0.7362	0.85906	0.67818	0.33422	0.28061	0.2672	0.02936	0.23107
VVD1	0.00379	0.07574	0.05474	0.06277	0.04997	0.10097	0.12507	0.13752	0.38744	0.46401	0.64801	0.69914	0.58624	0.64344	0.55998	0.35769	0.06253	0.05284	0.04751	0.10922	0.27875	0.27019	0.38412	0.43786	0.39948	0.1975	0.26081	0.27164	0.20547	0.10718	0.18743	0.18463	0.3479	0.46206	0.66898	0.80854	0.87044	0.88553	0.89013	0.87425	0.83625	0.72786	0.88227	0.74263	0.43843	0.39503	0.36857	0.14248	0.11076
VVD1	0.02451	0.02978	0.00407	0.05132	0.10444	0.27493	0.29026	0.3087	0.55115	0.62317	0.77362	0.81064	0.72922	0.77153	0.70691	0.53328	0.2506	0.13658	0.14331	0.29996	0.46048	0.44644	0.54826	0.57978	0.55072	0.34733	0.09508	0.10688	0.07284	0.03571	0.02574	0.02257	0.19861	0.32299	0.56004	0.71847	0.81848	0.84324	0.87915	0.85519	0.83475	0.76321	0.8749	0.67462	0.30458	0.23491	0.22829	0.0187	0.29647
VVD1	0.12138	0.06014	0.0876	0.10656	0.13822	0.28816	0.31605	0.32923	0.56736	0.63107	0.79629	0.83801	0.73733	0.78729	0.70432	0.50321	0.22138	0.09244	0.10592	0.26526	0.44241	0.44625	0.56033	0.61397	0.58099	0.39426	0.07298	0.08726	0.01823	0.08292	0.00408	0.00053	0.19314	0.31575	0.55635	0.75074	0.82693	0.85111	0.87075	0.84171	0.80008	0.70352	0.91179	0.75197	0.34516	0.30424	0.33919	0.0883	0.22354
VVD1	4e-05	0.04512	0.00555	0.06634	0.13003	0.30822	0.31564	0.33641	0.57886	0.65088	0.78792	0.81933	0.75138	0.78616	0.73025	0.57531	0.29902	0.19263	0.19663	0.35121	0.50211	0.4806	0.57501	0.59062	0.56742	0.36061	0.0616	0.07106	0.05934	0.0524	0.00686	0.01164	0.17116	0.29698	0.53766	0.68487	0.80245	0.82887	0.87957	0.85384	0.85142	0.80431	0.86795	0.64295	0.28365	0.18748	0.16396	0.08329	0.35536
VVD1	0.08939	0.02675	0.05489	0.07474	0.10337	0.25724	0.28417	0.29698	0.54116	0.60839	0.77718	0.81938	0.7164	0.76712	0.68379	0.48251	0.19616	0.07055	0.08225	0.24262	0.41863	0.4187	0.53399	0.58482	0.55212	0.36084	0.10369	0.11676	0.05253	0.04706	0.02808	0.03122	0.22752	0.35107	0.58732	0.76934	0.84754	0.87109	0.89157	0.86445	0.82793	0.7351	0.92192	0.76241	0.38204	0.32646	0.34197	0.09517	0.20872
VVD1	0.22571	0.15099	0.16455	0.13206	0.12753	0.24391	0.29125	0.29492	0.5224	0.5758	0.76342	0.8129	0.68243	0.74525	0.63921	0.40066	0.12463	0.01965	0.00237	0.16047	0.35506	0.38193	0.5115	0.59887	0.55989	0.4014	0.08652	0.10375	0.01596	0.09776	0.00697	0.01781	0.2207	0.33637	0.56501	0.79338	0.82647	0.84775	0.83668	0.80405	0.73117	0.59728	0.92856	0.84193	0.42346	0.42659	0.50549	0.26473	0.07312
VVD1	0.29622	0.22025	0.22957	0.18072	0.16201	0.25916	0.31561	0.31502	0.52879	0.57357	0.76266	0.81293	0.67465	0.74036	0.62536	0.37613	0.11192	0.03932	0.01265	0.14159	0.34146	0.38195	0.5162	0.61692	0.57486	0.43492	0.05378	0.07216	0.06695	0.14192	0.03014	0.01469	0.19372	0.30494	0.52997	0.7812	0.79693	0.81793	0.79557	0.76032	0.6731	0.52546	0.9204	0.86549	0.42577	0.45114	0.56404	0.32727	0.02643
VVD1	0.29754	0.23091	0.2471	0.21817	0.21671	0.32348	0.37839	0.37846	0.5883	0.63302	0.80835	0.85329	0.72749	0.78734	0.68002	0.44176	0.18215	0.03136	0.05837	0.21258	0.40931	0.44725	0.57652	0.66953	0.62896	0.4868	0.00257	0.01691	0.10978	0.19199	0.08585	0.07076	0.1368	0.25255	0.48891	0.74622	0.77701	0.80095	0.78987	0.75268	0.67062	0.53372	0.91141	0.83205	0.36444	0.38364	0.50542	0.26031	0.09988
VVD1	0.3684	0.29008	0.29505	0.22119	0.18876	0.26388	0.33344	0.325	0.51881	0.55515	0.7445	0.79577	0.64864	0.71786	0.59372	0.33272	0.08476	0.07301	0.04052	0.10696	0.31183	0.36729	0.50506	0.62343	0.57651	0.45965	0.02688	0.04795	0.11809	0.18256	0.06025	0.03735	0.16704	0.27107	0.48696	0.75986	0.75234	0.77159	0.73328	0.69706	0.58925	0.41894	0.88644	0.87218	0.40929	0.46929	0.62495	0.39731	0.03297
VVD1	0.34911	0.27248	0.28002	0.21331	0.18873	0.27164	0.33759	0.33136	0.52965	0.56969	0.75729	0.80792	0.66478	0.73299	0.61267	0.35498	0.10146	0.05537	0.02403	0.12613	0.33	0.38106	0.51693	0.6308	0.58475	0.4609	0.0286	0.04988	0.10906	0.17801	0.05654	0.03572	0.16609	0.27253	0.49347	0.76235	0.7626	0.78243	0.74779	0.71272	0.60876	0.44272	0.89066	0.86043	0.39404	0.44968	0.59846	0.36564	0.00365
VVD1	0.30346	0.24281	0.26286	0.24317	0.25331	0.36398	0.4176	0.4185	0.62386	0.66902	0.83526	0.877	0.75963	0.81688	0.71512	0.48365	0.22681	0.07581	0.10327	0.25708	0.45181	0.4886	0.61355	0.70296	0.66294	0.52123	0.03986	0.01972	0.14193	0.22623	0.12103	0.10526	0.09853	0.21509	0.45767	0.72017	0.75826	0.78374	0.77756	0.74067	0.65872	0.52585	0.8964	0.80205	0.31141	0.33355	0.46614	0.21563	0.14776
VVD1	0.35043	0.2856	0.30081	0.2614	0.25704	0.35166	0.41284	0.40965	0.60523	0.64474	0.81573	0.85957	0.7328	0.79365	0.6839	0.44116	0.19253	0.03684	0.06773	0.21826	0.41731	0.46421	0.59359	0.69544	0.6524	0.52472	0.04223	0.02087	0.16212	0.23955	0.12673	0.10647	0.09912	0.20978	0.44467	0.71964	0.74016	0.7641	0.7461	0.70869	0.61362	0.46531	0.88593	0.8226	0.32536	0.36763	0.523	0.27939	0.09107
VVD1	0.39379	0.31833	0.32401	0.24804	0.21941	0.29085	0.36135	0.35261	0.53723	0.57139	0.75464	0.80407	0.66041	0.7287	0.60706	0.34685	0.10527	0.05457	0.02033	0.12537	0.32968	0.38847	0.52395	0.64447	0.59728	0.4872	0.00353	0.01931	0.14994	0.21536	0.08975	0.06512	0.13447	0.2363	0.45333	0.73473	0.72553	0.74531	0.70577	0.67066	0.557	0.38316	0.86487	0.85107	0.36766	0.44064	0.6146	0.3862	0.01825
VVD1	0.35816	0.28814	0.30005	0.24526	0.23436	0.32276	0.38722	0.38215	0.5745	0.61388	0.79062	0.83729	0.70398	0.7684	0.65533	0.40469	0.15535	0.00226	0.02973	0.17982	0.38146	0.43169	0.56286	0.67226	0.62704	0.50378	0.01752	0.00523	0.1465	0.2209	0.10173	0.08036	0.1182	0.22662	0.45499	0.73023	0.7397	0.76172	0.73438	0.69955	0.59588	0.43467	0.87472	0.82765	0.33494	0.39216	0.55337	0.31478	0.05218
VVD1	0.33185	0.27454	0.29482	0.27551	0.28886	0.39527	0.45046	0.45135	0.64706	0.6887	0.84844	0.88823	0.77422	0.82968	0.72961	0.49987	0.25128	0.09819	0.12762	0.27879	0.47312	0.51408	0.63716	0.72897	0.68874	0.55485	0.07726	0.05558	0.18107	0.26561	0.15951	0.14205	0.06007	0.17571	0.41999	0.69301	0.72906	0.75591	0.7493	0.711	0.62423	0.48923	0.87749	0.78592	0.27474	0.30714	0.45918	0.20832	0.16139
VVD1	0.27072	0.22496	0.25368	0.27091	0.31195	0.44185	0.48495	0.49224	0.69463	0.74183	0.88529	0.91858	0.82537	0.87153	0.78872	0.58307	0.3321	0.18781	0.2125	0.36487	0.5481	0.57442	0.68705	0.75718	0.72281	0.57249	0.10751	0.08755	0.18038	0.27547	0.18449	0.17292	0.02511	0.14772	0.40406	0.66098	0.72696	0.75708	0.77241	0.73491	0.66891	0.56275	0.8732	0.73091	0.22044	0.2223	0.34818	0.08813	0.27127
VVD1	0.2133	0.18016	0.21701	0.27194	0.33732	0.48617	0.51562	0.52947	0.7349	0.78589	0.91001	0.93573	0.86501	0.90123	0.83535	0.65835	0.41053	0.27757	0.29744	0.44801	0.61691	0.62886	0.72938	0.77579	0.74878	0.58624	0.14375	0.12601	0.1831	0.28697	0.21266	0.2079	0.01341	0.11346	0.37728	0.61479	0.70957	0.74265	0.78009	0.74266	0.70009	0.62641	0.85512	0.66521	0.16469	0.13346	0.23244	0.03196	0.377
VVD1	0.1705	0.14529	0.18618	0.26389	0.34319	0.50147	0.5207	0.53967	0.74655	0.7998	0.91175	0.9334	0.8774	0.9075	0.8532	0.69692	0.4523	0.32847	0.34419	0.492	0.64982	0.65169	0.74343	0.77385	0.75174	0.58153	0.15767	0.14272	0.17641	0.28489	0.22121	0.22183	0.03159	0.09639	0.36125	0.58216	0.69448	0.72897	0.78049	0.74323	0.71735	0.66744	0.83855	0.61922	0.1347	0.082	0.15857	0.10574	0.43621
VVD1	0.1154	0.10273	0.15029	0.2583	0.36026	0.53163	0.54078	0.56437	0.7661	0.82164	0.91204	0.92628	0.89275	0.91325	0.87674	0.74955	0.51502	0.40368	0.41506	0.55723	0.69838	0.68794	0.76549	0.77558	0.75939	0.58389	0.19015	0.17692	0.181	0.29404	0.24593	0.25048	0.07233	0.05615	0.32213	0.52244	0.65705	0.69313	0.7621	0.72619	0.71923	0.6972	0.79584	0.53961	0.06977	0.00581	0.04993	0.21187	0.52174
VVD1	0.18098	0.1524	0.19212	0.25962	0.33641	0.49306	0.51774	0.53457	0.74023	0.79427	0.9098	0.93279	0.87216	0.90468	0.84704	0.68287	0.43648	0.30912	0.32664	0.4755	0.63738	0.64247	0.73636	0.77371	0.74921	0.58169	0.1497	0.13268	0.17696	0.28294	0.21397	0.21124	0.0248	0.10279	0.36788	0.59486	0.70026	0.73362	0.77873	0.74223	0.70866	0.64719	0.83953	0.62989	0.13695	0.09563	0.18227	0.0826	0.41673
VVD1	0.19327	0.15116	0.18493	0.22412	0.27947	0.42755	0.45918	0.47257	0.6878	0.74338	0.88106	0.91198	0.83035	0.87217	0.79941	0.6115	0.35208	0.21768	0.23671	0.39083	0.56464	0.57615	0.68196	0.7343	0.70447	0.53609	0.08095	0.06296	0.12854	0.2303	0.15055	0.1453	0.04718	0.17269	0.43069	0.6607	0.74738	0.77768	0.80671	0.77151	0.72601	0.64036	0.87405	0.69632	0.21597	0.18744	0.274	0.01187	0.3269
VVD1	0.07473	0.04583	0.0896	0.17622	0.26034	0.4346	0.44346	0.46715	0.68967	0.75414	0.86872	0.89118	0.83876	0.86721	0.82008	0.67397	0.41616	0.30319	0.31278	0.46319	0.61275	0.59953	0.68734	0.70389	0.68352	0.49322	0.07768	0.06372	0.07454	0.18971	0.13732	0.141	0.03997	0.16849	0.42583	0.60782	0.73269	0.76422	0.82184	0.79072	0.78236	0.74199	0.83813	0.59735	0.16556	0.08615	0.11279	0.14644	0.44505
VVD1	0.03269	0.05581	0.00637	0.10698	0.20428	0.39468	0.38661	0.4157	0.64283	0.71444	0.81585	0.83461	0.80017	0.82101	0.79141	0.67505	0.41814	0.32426	0.32531	0.47123	0.6007	0.56876	0.643	0.63418	0.61931	0.41282	0.03194	0.02122	0.0076	0.11469	0.0841	0.09366	0.07041	0.19696	0.44223	0.57585	0.72245	0.75317	0.82671	0.80192	0.81935	0.80755	0.79505	0.51951	0.15046	0.03583	0.00714	0.24087	0.49463
VVD1	0.09215	0.04799	0.08552	0.13954	0.20433	0.3709	0.38991	0.40779	0.63755	0.703	0.84073	0.87234	0.79763	0.83622	0.77291	0.60033	0.32917	0.20755	0.21943	0.37526	0.53876	0.53367	0.63405	0.66924	0.64123	0.45131	0.00706	0.00855	0.03097	0.1419	0.076	0.07541	0.10815	0.23484	0.48561	0.67469	0.77723	0.80645	0.84483	0.815	0.7884	0.71771	0.86658	0.65973	0.232	0.17613	0.21118	0.04656	0.35035
VVD1	0.14258	0.0778	0.10441	0.10294	0.13017	0.27408	0.31189	0.31992	0.55301	0.61715	0.78802	0.83223	0.72256	0.77734	0.68804	0.47341	0.19016	0.05481	0.07144	0.23251	0.41619	0.42727	0.54625	0.61277	0.57419	0.39482	0.08419	0.10152	0.01478	0.08389	0.00651	0.01434	0.20286	0.32231	0.55916	0.76421	0.82664	0.84997	0.85604	0.82852	0.77307	0.65548	0.90269	0.76194	0.33993	0.323	0.37956	0.12964	0.18657
VVD1	0.27704	0.20703	0.2237	0.18511	0.18702	0.29588	0.35079	0.35225	0.56245	0.61159	0.78886	0.83591	0.70957	0.77155	0.66583	0.42709	0.16212	0.01196	0.03763	0.19322	0.38938	0.42469	0.55234	0.64742	0.60463	0.45972	0.02892	0.04899	0.08207	0.16493	0.05226	0.03753	0.1554	0.26738	0.49921	0.7504	0.77757	0.80095	0.78439	0.75118	0.66518	0.51898	0.89039	0.80806	0.34171	0.37368	0.49539	0.25086	0.09696
VVD1	0.21814	0.15535	0.18016	0.16874	0.18988	0.32037	0.36691	0.37075	0.58955	0.64541	0.81288	0.85572	0.74325	0.7992	0.70476	0.48168	0.20969	0.0662	0.08758	0.24626	0.43527	0.4584	0.58019	0.65855	0.61901	0.45778	0.02513	0.0446	0.06093	0.15381	0.05339	0.04239	0.15093	0.2666	0.5073	0.74111	0.79176	0.81697	0.81601	0.78417	0.71472	0.58688	0.89215	0.77064	0.31016	0.31609	0.41235	0.15996	0.1771
VVD1	0.19631	0.13646	0.16511	0.16491	0.19412	0.3337	0.37885	0.3825	0.60608	0.66483	0.8293	0.8702	0.76109	0.81404	0.72169	0.50281	0.22813	0.08622	0.10732	0.26754	0.45548	0.47526	0.59695	0.66967	0.63047	0.46284	0.01936	0.03971	0.05506	0.15174	0.05897	0.04782	0.15021	0.26869	0.51356	0.74195	0.80208	0.82808	0.83331	0.80188	0.73871	0.6153	0.89925	0.76508	0.3034	0.29679	0.38576	0.1303	0.20713
VVD1	0.33365	0.26404	0.27719	0.22329	0.21651	0.31173	0.37613	0.37038	0.5681	0.61043	0.78826	0.83542	0.7018	0.76557	0.65146	0.40237	0.14877	0.00742	0.02332	0.17469	0.3761	0.42366	0.55613	0.66406	0.61855	0.49039	0.000727	0.0221	0.12853	0.20328	0.08391	0.06361	0.13538	0.24216	0.47084	0.74079	0.752	0.77462	0.74724	0.71161	0.61218	0.44985	0.87667	0.82466	0.33809	0.39094	0.54474	0.3039	0.05786
VVD1	0.36718	0.29195	0.29894	0.222	0.19928	0.27706	0.34708	0.33889	0.52678	0.56487	0.74877	0.79905	0.65611	0.72445	0.60348	0.34485	0.09836	0.06021	0.02742	0.11979	0.32365	0.37936	0.51454	0.63473	0.58611	0.4716	0.0162	0.03954	0.12962	0.19546	0.06619	0.04355	0.14954	0.2499	0.46656	0.74229	0.73384	0.75397	0.71294	0.67744	0.56556	0.38824	0.85641	0.83645	0.35773	0.43181	0.60034	0.37009	0.01016
VVD1	0.34014	0.27357	0.2886	0.24038	0.23812	0.3344	0.39787	0.39324	0.58819	0.62982	0.80263	0.84795	0.71869	0.78051	0.66891	0.4241	0.17269	0.01663	0.04726	0.19828	0.39826	0.44566	0.57637	0.68202	0.63697	0.50889	0.02155	0.00153	0.14507	0.22252	0.10492	0.08453	0.1144	0.22134	0.45314	0.72573	0.74104	0.76478	0.74113	0.70324	0.60498	0.44571	0.86823	0.80869	0.31283	0.36572	0.52396	0.281	0.08227
VVD1	0.34216	0.28065	0.29874	0.26282	0.26814	0.36886	0.43086	0.42682	0.6204	0.66065	0.82676	0.86943	0.74637	0.80516	0.69722	0.45879	0.20981	0.05432	0.08474	0.23563	0.43356	0.47967	0.60816	0.70852	0.66545	0.53676	0.05356	0.03082	0.16972	0.25004	0.13777	0.11828	0.08593	0.1947	0.43226	0.70763	0.73132	0.75744	0.74035	0.70047	0.60653	0.45532	0.86728	0.79529	0.28816	0.33442	0.49516	0.24805	0.1194
VVD1	0.26299	0.20821	0.23655	0.23319	0.26009	0.38813	0.43826	0.43902	0.6481	0.69857	0.85574	0.89407	0.7862	0.8374	0.74322	0.52453	0.26274	0.11548	0.14049	0.29642	0.48611	0.51567	0.63746	0.71588	0.67713	0.52357	0.04499	0.02282	0.12382	0.22026	0.12679	0.11342	0.09169	0.20724	0.45478	0.70622	0.76054	0.78899	0.79355	0.75565	0.68317	0.55463	0.88015	0.75781	0.26088	0.27089	0.39479	0.13884	0.2151
VVD1	0.24442	0.20506	0.23836	0.26661	0.31781	0.45749	0.49855	0.50461	0.70606	0.75531	0.88956	0.92043	0.836	0.87732	0.79969	0.60691	0.3557	0.21627	0.23909	0.39094	0.56784	0.58898	0.69778	0.75919	0.72658	0.5713	0.11483	0.09486	0.17392	0.27481	0.1879	0.17823	0.016	0.13431	0.39205	0.64029	0.71578	0.7475	0.76995	0.73047	0.67482	0.57415	0.84999	0.68961	0.18071	0.17373	0.29422	0.03247	0.31652
VVD1	0.19731	0.13297	0.15825	0.1457	0.16869	0.30532	0.35594	0.35552	0.5798	0.63848	0.81044	0.85472	0.73699	0.79309	0.6954	0.46731	0.18976	0.0455	0.06785	0.2287	0.42055	0.44401	0.56988	0.65	0.60832	0.44244	0.04586	0.06762	0.03876	0.13104	0.03462	0.01967	0.17889	0.29394	0.53317	0.76204	0.8121	0.83678	0.83397	0.80262	0.73203	0.59527	0.89904	0.78406	0.3282	0.32887	0.42282	0.17226	0.16498
VVD1	0.22478	0.16428	0.19075	0.18392	0.20987	0.34317	0.39111	0.39309	0.61036	0.6653	0.82915	0.87075	0.75988	0.81366	0.72035	0.49855	0.22881	0.08446	0.10698	0.26548	0.4545	0.47891	0.60073	0.67879	0.63904	0.4779	0.00468	0.02542	0.07976	0.1738	0.07617	0.06216	0.13509	0.25034	0.49366	0.73157	0.78465	0.81043	0.8117	0.77758	0.70786	0.57935	0.88692	0.76433	0.29275	0.29798	0.40175	0.14846	0.19351
VVD1	0.10528	0.05248	0.08855	0.12017	0.17383	0.33691	0.37133	0.37904	0.60896	0.67475	0.8244	0.86098	0.77085	0.81568	0.74263	0.54889	0.27171	0.14264	0.15688	0.31671	0.48954	0.49273	0.60243	0.65322	0.61789	0.43073	0.03171	0.05017	0.01229	0.11938	0.04361	0.03536	0.14923	0.26868	0.51342	0.71045	0.79681	0.82337	0.84658	0.81852	0.77621	0.67733	0.86908	0.69215	0.25708	0.22059	0.27223	0.0181	0.2907
VVD1	0.0074	0.07249	0.0375	0.01505	0.03152	0.20403	0.23432	0.24162	0.48572	0.56281	0.72538	0.76782	0.67131	0.71982	0.6484	0.45548	0.16398	0.04672	0.05413	0.21481	0.38134	0.37179	0.4807	0.52586	0.48785	0.28356	0.172	0.18877	0.13529	0.02898	0.09993	0.10394	0.27003	0.38429	0.60826	0.75798	0.8422	0.86204	0.87889	0.86223	0.82835	0.72454	0.85518	0.68213	0.32672	0.2759	0.27235	0.03514	0.22881
VVD1	0.05029	0.05498	0.04612	0.1319	0.15998	0.03922	0.01813	0.00924	0.24787	0.3209	0.53771	0.60198	0.44557	0.52227	0.4091	0.15383	0.14269	0.27156	0.2578	0.10106	0.08832	0.10498	0.23905	0.33793	0.28397	0.10891	0.37417	0.39279	0.25769	0.18645	0.29627	0.31242	0.46461	0.55822	0.73136	0.88284	0.8846	0.88961	0.84339	0.83688	0.75206	0.56898	0.84926	0.81261	0.52681	0.54746	0.56254	0.3642	0.11459
VVD1	0.2832	0.19256	0.19694	0.10098	0.06874	0.15278	0.22162	0.21272	0.41424	0.46301	0.66319	0.72108	0.56709	0.64244	0.51999	0.25391	0.01003	0.16173	0.13374	0.01689	0.21926	0.26642	0.40317	0.52483	0.47198	0.34123	0.15162	0.1742	0.0021	0.06336	0.07048	0.09389	0.26817	0.36201	0.55857	0.79753	0.78125	0.79524	0.74341	0.71755	0.60543	0.41432	0.84708	0.83555	0.41768	0.49245	0.62022	0.40276	0.07981
VVD1	0.3466	0.24751	0.23952	0.09862	0.03513	0.08423	0.1648	0.14696	0.32694	0.36546	0.57591	0.63914	0.46616	0.54933	0.41165	0.12842	0.11632	0.27083	0.23751	0.09801	0.10751	0.17147	0.31418	0.45853	0.40116	0.30098	0.18098	0.20473	0.00259	0.04777	0.0993	0.12793	0.29663	0.37736	0.54737	0.79478	0.73858	0.74725	0.66887	0.64345	0.50933	0.29122	0.80254	0.86055	0.46513	0.57758	0.73361	0.54052	0.22199
VVD1	0.38532	0.29771	0.29445	0.17303	0.12199	0.17466	0.25367	0.23858	0.41429	0.44865	0.64688	0.70454	0.54242	0.62056	0.48784	0.21202	0.02704	0.18568	0.15087	0.01033	0.19559	0.26115	0.40117	0.54074	0.48669	0.38936	0.0936	0.11785	0.08187	0.13319	0.01035	0.03861	0.21832	0.30502	0.49259	0.76153	0.71833	0.73233	0.66519	0.63348	0.50256	0.29719	0.81514	0.85195	0.41238	0.52004	0.69634	0.48978	0.14836
VVD1	0.42251	0.34215	0.33885	0.22059	0.17392	0.21956	0.3018	0.28555	0.44888	0.47719	0.66555	0.71991	0.56342	0.63933	0.50848	0.23749	0.01152	0.14857	0.11163	0.02444	0.22849	0.29884	0.43583	0.57676	0.52429	0.43888	0.03501	0.0596	0.14438	0.19228	0.04656	0.01666	0.16333	0.24803	0.43808	0.72167	0.67733	0.69365	0.62752	0.59235	0.45884	0.25681	0.79438	0.83342	0.37118	0.48725	0.6862	0.47902	0.12842
VVD1	0.43336	0.35301	0.35004	0.23422	0.18618	0.23034	0.31426	0.29745	0.45839	0.48481	0.67153	0.72493	0.56941	0.64445	0.51294	0.24274	0.01996	0.1408	0.10322	0.03199	0.23605	0.30788	0.44475	0.58611	0.53366	0.45053	0.02145	0.04579	0.15716	0.2039	0.06134	0.03179	0.14771	0.23365	0.42534	0.71281	0.66868	0.68467	0.62038	0.58445	0.44977	0.24719	0.7901	0.82994	0.36012	0.47836	0.68347	0.47649	0.12264
VVD1	0.42809	0.34098	0.33369	0.20232	0.13973	0.17529	0.26086	0.24203	0.40245	0.42834	0.62329	0.68024	0.51589	0.59465	0.4576	0.1809	0.04146	0.20093	0.1632	0.03048	0.17441	0.24835	0.38798	0.53547	0.48062	0.40219	0.06712	0.09072	0.12211	0.16164	0.01697	0.01511	0.19197	0.27271	0.45167	0.73161	0.67446	0.68741	0.61301	0.58027	0.44085	0.22934	0.78489	0.84876	0.40548	0.52966	0.72867	0.53238	0.1875
VVD1	0.45139	0.3541	0.33391	0.15868	0.06257	0.06364	0.15646	0.1316	0.26968	0.28736	0.48982	0.55215	0.37305	0.4588	0.31185	0.02736	0.17269	0.32672	0.28774	0.17015	0.02948	0.11426	0.25426	0.41862	0.36074	0.31026	0.13216	0.15496	0.08569	0.10296	0.05228	0.08739	0.24414	0.30692	0.44786	0.716	0.61985	0.62546	0.52539	0.49822	0.34282	0.1103	0.71062	0.84118	0.4556	0.61115	0.81692	0.65502	0.33849
VVD1	0.39938	0.29415	0.27468	0.09556	0.00397	0.00654	0.0972	0.07269	0.22481	0.2502	0.46325	0.52936	0.34456	0.43294	0.2857	0.0039	0.21917	0.37075	0.33513	0.21224	0.01174	0.06664	0.20956	0.37134	0.31128	0.24554	0.20568	0.2278	0.00821	0.02975	0.12318	0.15619	0.31204	0.37488	0.51137	0.75995	0.66597	0.6689	0.5672	0.5446	0.39289	0.15566	0.72826	0.85518	0.49866	0.64424	0.82266	0.66172	0.36005
VVD1	0.44692	0.33854	0.3015	0.07414	0.0622	0.10731	0.00902	0.04062	0.06231	0.06957	0.27419	0.3415	0.1505	0.24174	0.09053	0.19106	0.35432	0.49263	0.45505	0.36254	0.18067	0.08716	0.04635	0.22403	0.16414	0.15013	0.23424	0.2541	0.00996	0.000891	0.16172	0.19818	0.32023	0.35426	0.43442	0.66744	0.52387	0.51832	0.38695	0.36966	0.20146	0.04937	0.57709	0.79002	0.50871	0.69793	0.89618	0.78991	0.53251
VVD1	0.4663	0.36085	0.3266	0.10924	0.01984	0.05745	0.03982	0.00961	0.11958	0.1277	0.33201	0.39819	0.20892	0.29876	0.14658	0.137	0.30694	0.45066	0.41172	0.31356	0.12604	0.03253	0.10328	0.27917	0.22064	0.20101	0.19845	0.21918	0.04134	0.0377	0.1227	0.15828	0.29204	0.33442	0.43069	0.67797	0.54387	0.54186	0.41695	0.39554	0.22944	0.01654	0.61645	0.8129	0.50074	0.68455	0.8894	0.76865	0.49116
VVD1	0.38692	0.27847	0.25749	0.07428	0.03008	0.01897	0.06931	0.0453	0.20304	0.23067	0.44908	0.5171	0.3286	0.41851	0.26943	0.02268	0.24329	0.39399	0.35946	0.23506	0.03357	0.0427	0.18718	0.34839	0.28905	0.21932	0.23485	0.25617	0.02121	0.00221	0.1515	0.18372	0.34042	0.40478	0.53869	0.78071	0.68583	0.68804	0.58444	0.56358	0.41408	0.17776	0.7449	0.87255	0.5301	0.67202	0.83743	0.67722	0.37911
VVD1	0.35745	0.23889	0.20726	0.01338	0.1464	0.16332	0.07335	0.10211	0.03587	0.05989	0.28264	0.3553	0.15687	0.25127	0.09949	0.19078	0.39143	0.52929	0.49679	0.38815	0.19969	0.12059	0.01955	0.18895	0.12762	0.0783	0.33623	0.35602	0.10689	0.10183	0.25866	0.29362	0.4219	0.46449	0.55265	0.75979	0.63242	0.62531	0.49866	0.48745	0.33125	0.08008	0.65036	0.83372	0.5774	0.74	0.88864	0.76944	0.52189
VVD1	0.44591	0.3346	0.28715	0.03126	0.12982	0.2076	0.11389	0.14609	0.07133	0.0716	0.1267	0.19473	0.00266	0.09358	0.05614	0.32471	0.45645	0.58032	0.54426	0.47153	0.30751	0.21115	0.08731	0.09343	0.03674	0.04994	0.28309	0.30075	0.03069	0.05677	0.22107	0.25753	0.3495	0.36444	0.4032	0.60889	0.43789	0.42563	0.27791	0.26653	0.09693	0.15404	0.47545	0.73397	0.52689	0.7354	0.92291	0.85524	0.64269
VVD1	0.41818	0.30262	0.26507	0.0333	0.10979	0.14901	0.05635	0.08532	0.03211	0.04569	0.2615	0.33226	0.1346	0.22766	0.07316	0.21368	0.39097	0.52854	0.49305	0.39469	0.21009	0.12209	0.01549	0.19118	0.13184	0.10578	0.28994	0.30871	0.05	0.05415	0.21477	0.2497	0.37391	0.41192	0.49181	0.71335	0.57192	0.56529	0.43394	0.4187	0.25554	0.00595	0.61667	0.82442	0.56469	0.74343	0.91518	0.80648	0.55442
VVD1	0.24296	0.11316	0.08454	0.13134	0.26398	0.25617	0.17262	0.19919	0.02934	0.01076	0.25115	0.32944	0.12425	0.2216	0.06986	0.22434	0.45548	0.5868	0.56127	0.44173	0.25223	0.18978	0.04482	0.11403	0.05077	0.03098	0.46168	0.47917	0.24863	0.23374	0.38017	0.41122	0.53957	0.58893	0.67518	0.84413	0.73091	0.72107	0.60005	0.59654	0.45419	0.20538	0.70406	0.86589	0.66383	0.79222	0.87942	0.75848	0.53387
VVD1	0.2265	0.09848	0.03967	0.24547	0.43694	0.52776	0.44676	0.47997	0.41305	0.40336	0.20038	0.12531	0.3196	0.22699	0.36652	0.60583	0.71872	0.80034	0.77916	0.73152	0.60612	0.5329	0.42548	0.26101	0.317	0.30517	0.55362	0.56307	0.31602	0.36172	0.50368	0.53273	0.56613	0.55345	0.5086	0.59517	0.40192	0.37389	0.20993	0.22335	0.07443	0.16961	0.32382	0.62409	0.64304	0.82985	0.90332	0.90836	0.82785
VVD1	0.34111	0.22538	0.16033	0.13144	0.32826	0.45273	0.36759	0.40192	0.37375	0.3831	0.20103	0.13226	0.31822	0.23057	0.37031	0.59907	0.67013	0.753	0.72506	0.69474	0.57633	0.48646	0.38592	0.21309	0.26525	0.21236	0.42718	0.43752	0.17527	0.2357	0.38395	0.41408	0.44505	0.42421	0.37282	0.49165	0.28091	0.25528	0.08628	0.0914	0.068	0.30693	0.25419	0.58574	0.57276	0.78741	0.91593	0.93334	0.83704
VVD1	0.23552	0.10123	0.05052	0.22159	0.40059	0.45873	0.37757	0.40703	0.29774	0.27567	0.04959	0.02958	0.17681	0.08012	0.23064	0.49661	0.6571	0.75807	0.73552	0.66073	0.50769	0.43722	0.31112	0.14425	0.20326	0.22525	0.54915	0.56188	0.31454	0.3382	0.48677	0.5121	0.58479	0.59807	0.59923	0.71607	0.54512	0.52262	0.36915	0.37668	0.2276	0.02273	0.48473	0.74632	0.69657	0.86137	0.93323	0.89339	0.75889
VVD1	0.053	0.18397	0.23715	0.49857	0.68462	0.74883	0.70424	0.72524	0.64365	0.61094	0.41845	0.34476	0.51577	0.43399	0.54274	0.72663	0.84256	0.87612	0.87619	0.84216	0.7604	0.73208	0.64962	0.53258	0.58041	0.60378	0.77556	0.77643	0.60026	0.63602	0.73748	0.74867	0.7389	0.71761	0.62461	0.57984	0.41358	0.37517	0.22915	0.26377	0.16728	0.03087	0.2253	0.48396	0.70421	0.8174	0.74094	0.78856	0.83326
VVD1	0.03349	0.06238	0.13494	0.4062	0.611	0.76823	0.72725	0.75603	0.80388	0.81929	0.70994	0.65812	0.7835	0.72449	0.80357	0.90254	0.86649	0.85462	0.85218	0.89659	0.88771	0.84139	0.80884	0.70181	0.73205	0.64151	0.60364	0.59838	0.43059	0.52314	0.60154	0.61406	0.52926	0.45257	0.26283	0.18436	0.02959	0.07357	0.23109	0.19552	0.28983	0.44526	0.18693	0.16485	0.49726	0.65905	0.63284	0.78679	0.92673
VVD1	0.10422	0.00236	0.07638	0.36297	0.57649	0.73135	0.67956	0.70976	0.73704	0.75007	0.61653	0.55776	0.70382	0.63471	0.73236	0.86717	0.85856	0.86856	0.86034	0.88783	0.85183	0.79475	0.74372	0.61828	0.6539	0.57118	0.5945	0.59191	0.3946	0.48298	0.58426	0.59813	0.53982	0.47587	0.31297	0.27689	0.05625	0.01516	0.15081	0.12056	0.23098	0.4071	0.07047	0.28823	0.55835	0.73286	0.73403	0.86049	0.94831
VVD1	0.21663	0.10605	0.03288	0.26476	0.47977	0.63209	0.56222	0.59889	0.61306	0.62925	0.47665	0.41395	0.58022	0.50284	0.62115	0.79681	0.8107	0.8497	0.83115	0.84015	0.77199	0.69592	0.62364	0.47394	0.51698	0.43526	0.52551	0.52905	0.2992	0.38335	0.50094	0.52448	0.50323	0.45145	0.32375	0.35096	0.12375	0.08763	0.0856	0.06623	0.20212	0.4114	0.03545	0.40653	0.57081	0.76932	0.83257	0.92568	0.94124
VVD1	0.2968	0.18017	0.1108	0.18802	0.39826	0.53547	0.45336	0.49175	0.47756	0.49057	0.31455	0.24703	0.43129	0.34551	0.48141	0.69472	0.74589	0.81244	0.78729	0.77179	0.66992	0.58413	0.49147	0.32495	0.37354	0.30839	0.47713	0.48488	0.23061	0.30283	0.43907	0.46902	0.4863	0.45402	0.37062	0.45313	0.23194	0.2011	0.0287	0.03795	0.11293	0.34449	0.18142	0.53944	0.60203	0.80826	0.90983	0.95971	0.90278
VVD1	0.35931	0.23896	0.17787	0.1092	0.30764	0.41831	0.32817	0.36562	0.31674	0.32296	0.12576	0.05432	0.25134	0.15929	0.30927	0.55783	0.65297	0.74709	0.71723	0.67267	0.53728	0.44561	0.33293	0.15553	0.20998	0.1719	0.42543	0.43752	0.16979	0.22311	0.37238	0.40602	0.46279	0.45304	0.4236	0.55981	0.35622	0.33209	0.1675	0.16816	0.00448	0.24668	0.33542	0.66065	0.61121	0.81673	0.95149	0.94929	0.8197
VVD1	0.41893	0.30108	0.24905	0.01843	0.19566	0.28162	0.18471	0.22208	0.14993	0.15142	0.0528	0.12333	0.07654	0.01648	0.13955	0.4092	0.53411	0.65091	0.61541	0.54908	0.38921	0.2929	0.16741	0.01496	0.04242	0.0224	0.33849	0.35542	0.08233	0.11888	0.27587	0.31233	0.40357	0.4131	0.43152	0.61765	0.43491	0.41918	0.26534	0.25747	0.08706	0.16881	0.45412	0.74089	0.58492	0.78724	0.95704	0.90957	0.71527
VVD1	0.42471	0.30765	0.26383	0.01536	0.14326	0.20283	0.10524	0.14028	0.04245	0.03571	0.17653	0.24727	0.04633	0.14025	0.01795	0.30126	0.4564	0.58659	0.54981	0.46478	0.28832	0.19444	0.0597	0.12147	0.06162	0.05741	0.307	0.32598	0.0567	0.07694	0.23533	0.27249	0.38745	0.41331	0.46802	0.678	0.5169	0.50619	0.36393	0.35109	0.18203	0.07553	0.54972	0.79827	0.57862	0.76834	0.94497	0.86296	0.63025
VVD1	0.44807	0.33594	0.30101	0.07854	0.05927	0.09566	0.000793	0.03038	0.08668	0.098	0.31062	0.37901	0.18256	0.27431	0.11624	0.17296	0.34956	0.492	0.45316	0.35309	0.1633	0.07122	0.06892	0.24558	0.18595	0.16261	0.24048	0.26133	0.000461	0.00411	0.16133	0.19855	0.33704	0.37937	0.47103	0.70866	0.57166	0.56737	0.44021	0.42088	0.25613	0.00453	0.63281	0.83775	0.54596	0.72244	0.91347	0.79677	0.52322
VVD1	0.44028	0.33598	0.3137	0.12963	0.02377	0.02321	0.11483	0.08956	0.23384	0.25429	0.46527	0.53023	0.34394	0.43173	0.2798	0.01073	0.21668	0.3699	0.33151	0.21227	0.01054	0.0735	0.21724	0.38247	0.32387	0.26977	0.17644	0.19882	0.04224	0.06147	0.09268	0.12671	0.28694	0.34989	0.48591	0.74548	0.6454	0.64901	0.54463	0.51973	0.36547	0.12798	0.72892	0.86797	0.5024	0.65386	0.84579	0.68722	0.37528
VVD1	0.42366	0.32568	0.31232	0.15657	0.07261	0.09618	0.18398	0.16219	0.3229	0.3493	0.55694	0.61883	0.44066	0.52479	0.37785	0.09021	0.1321	0.29006	0.25245	0.12222	0.08439	0.16189	0.30662	0.46186	0.40491	0.33135	0.13613	0.15989	0.06402	0.09767	0.05004	0.08191	0.25684	0.33192	0.49389	0.76195	0.68729	0.6956	0.60759	0.57945	0.43449	0.20852	0.78058	0.87657	0.47191	0.6022	0.79035	0.60806	0.27619
VVD1	0.40083	0.31212	0.3083	0.18861	0.13134	0.18111	0.26195	0.24564	0.42197	0.45406	0.65368	0.71092	0.54638	0.62426	0.48666	0.20873	0.02776	0.1878	0.15199	0.01232	0.19596	0.26428	0.40697	0.54758	0.49392	0.39999	0.08292	0.10676	0.09409	0.14288	0.0042	0.02425	0.21179	0.30036	0.49011	0.76455	0.72049	0.73428	0.66761	0.63578	0.5051	0.29944	0.82896	0.87258	0.42973	0.53331	0.71335	0.50629	0.15642
VVD1	0.40427	0.33064	0.33627	0.25642	0.22834	0.29681	0.36995	0.35972	0.53844	0.57087	0.75138	0.80053	0.6572	0.72563	0.60138	0.34206	0.10538	0.05497	0.01984	0.1238	0.32802	0.3895	0.52477	0.64895	0.60106	0.49745	0.01506	0.00862	0.16781	0.22953	0.10017	0.07546	0.12089	0.21911	0.43491	0.7218	0.70758	0.72823	0.68467	0.6465	0.53033	0.35106	0.84436	0.83649	0.34625	0.42907	0.61513	0.38728	0.01924
VVD1	0.37367	0.30816	0.32086	0.26971	0.26116	0.34817	0.41379	0.40807	0.59595	0.63248	0.80387	0.84859	0.71798	0.78021	0.66495	0.4188	0.17564	0.01775	0.05071	0.1986	0.39939	0.45216	0.58321	0.69295	0.6487	0.53078	0.04811	0.02489	0.17854	0.25082	0.1327	0.11109	0.09208	0.19813	0.42904	0.71168	0.72085	0.74506	0.71848	0.67845	0.5772	0.41762	0.86501	0.81838	0.31488	0.37333	0.54547	0.30484	0.06703
VVD1	0.32241	0.27097	0.29466	0.28766	0.31097	0.42462	0.47887	0.47928	0.67477	0.71642	0.86859	0.9054	0.79798	0.84938	0.75155	0.5307	0.28427	0.13306	0.16209	0.31288	0.50393	0.54272	0.66398	0.75013	0.71189	0.5759	0.10263	0.08059	0.19865	0.28538	0.18497	0.1681	0.03861	0.15307	0.40263	0.67546	0.7197	0.74878	0.74833	0.70615	0.62743	0.50006	0.87104	0.76597	0.24799	0.27236	0.42397	0.16833	0.20167
VVD1	0.35592	0.30316	0.32449	0.30733	0.32219	0.42575	0.48247	0.48145	0.67057	0.70834	0.86227	0.89991	0.78842	0.8414	0.73899	0.5139	0.27256	0.11909	0.14962	0.29818	0.49143	0.53565	0.65884	0.75103	0.7119	0.5845	0.11154	0.08933	0.21652	0.30001	0.19547	0.17683	0.0315	0.14349	0.38986	0.67052	0.70606	0.73476	0.72919	0.68547	0.60027	0.46603	0.86378	0.77337	0.24879	0.28484	0.45013	0.19733	0.17783
VVD1	0.38193	0.32284	0.33976	0.3016	0.3021	0.39266	0.45504	0.45112	0.63508	0.67059	0.8324	0.87358	0.75208	0.80996	0.70041	0.46347	0.22447	0.06779	0.10021	0.24722	0.44482	0.49578	0.62275	0.7262	0.68394	0.56516	0.08787	0.06507	0.20958	0.28716	0.17316	0.15219	0.05278	0.16017	0.39802	0.68424	0.70343	0.72951	0.71108	0.66878	0.57217	0.42237	0.85721	0.7934	0.27317	0.32732	0.50406	0.25781	0.11764
VVD1	0.42676	0.35877	0.36686	0.29593	0.27173	0.3385	0.41026	0.40129	0.5741	0.60322	0.77568	0.82173	0.68468	0.74948	0.62783	0.37534	0.14552	0.01489	0.02059	0.16223	0.36448	0.42721	0.55995	0.6809	0.63452	0.53461	0.05836	0.03501	0.20719	0.27187	0.14629	0.12074	0.08062	0.17929	0.40015	0.69463	0.68578	0.70837	0.67024	0.62913	0.51561	0.34397	0.83944	0.82369	0.31614	0.39798	0.59376	0.36235	0.01296
VVD1	0.43852	0.35665	0.35513	0.2446	0.19235	0.23858	0.31885	0.30335	0.47061	0.49759	0.6869	0.74029	0.58322	0.65742	0.52291	0.25142	0.02426	0.13722	0.10006	0.0375	0.24387	0.31511	0.45481	0.59301	0.54163	0.4545	0.02195	0.04606	0.15206	0.20349	0.06549	0.03628	0.15572	0.24391	0.44044	0.72809	0.68856	0.70515	0.64387	0.60742	0.47813	0.27965	0.81944	0.85577	0.38628	0.4925	0.6906	0.4792	0.11777
VVD1	0.44208	0.35103	0.34187	0.20382	0.13091	0.16037	0.24633	0.22671	0.38788	0.4125	0.61228	0.67053	0.50026	0.58036	0.43728	0.15537	0.06611	0.22621	0.18816	0.05597	0.15089	0.22808	0.37171	0.5213	0.4668	0.39137	0.0782	0.1023	0.11358	0.15205	0.00747	0.02445	0.20784	0.28763	0.46344	0.74308	0.68115	0.69331	0.61589	0.58385	0.44374	0.22906	0.79617	0.87188	0.43764	0.55909	0.75641	0.56287	0.21552
VVD1	0.44692	0.34761	0.33012	0.16292	0.06782	0.07729	0.16817	0.14435	0.29473	0.31561	0.52337	0.58587	0.4043	0.48971	0.3396	0.05091	0.161	0.31777	0.27919	0.15473	0.04986	0.13263	0.27728	0.43751	0.38054	0.3196	0.13623	0.15952	0.07277	0.09881	0.05081	0.08432	0.25712	0.32629	0.47754	0.74655	0.65996	0.66661	0.57243	0.54397	0.3942	0.1643	0.75701	0.87555	0.4828	0.62243	0.81864	0.64712	0.31902
VVD1	0.44706	0.34626	0.32651	0.15445	0.05527	0.06047	0.15206	0.1277	0.27574	0.29575	0.50461	0.5679	0.38479	0.47098	0.32019	0.03094	0.17838	0.33404	0.29528	0.17291	0.03083	0.1141	0.2582	0.42015	0.36325	0.30566	0.14626	0.16872	0.06727	0.08946	0.0611	0.09484	0.26514	0.33248	0.47888	0.74596	0.65467	0.66004	0.56335	0.53509	0.38459	0.1539	0.75045	0.87712	0.49466	0.63675	0.8309	0.66417	0.3401
VVD1	0.44986	0.34008	0.30899	0.09874	0.031	0.0572	0.03846	0.00894	0.13565	0.14927	0.36286	0.43036	0.23573	0.32664	0.16948	0.12165	0.3089	0.45558	0.41668	0.30963	0.11511	0.02511	0.11704	0.29021	0.23171	0.19871	0.21942	0.24076	0.01326	0.01736	0.13848	0.17476	0.32398	0.37338	0.47989	0.72577	0.6007	0.59891	0.47926	0.45758	0.29684	0.05082	0.67294	0.85813	0.54415	0.71014	0.89964	0.76898	0.48036
VVD1	0.42759	0.31472	0.28227	0.06788	0.0642	0.08917	0.00583	0.02367	0.10666	0.12236	0.34055	0.41022	0.21303	0.30551	0.14776	0.14466	0.33511	0.47959	0.44223	0.33493	0.14101	0.05348	0.08903	0.2621	0.20321	0.16631	0.25253	0.2732	0.01878	0.01549	0.17379	0.20834	0.35294	0.40229	0.50415	0.74088	0.61347	0.61006	0.48801	0.46881	0.3091	0.06237	0.67592	0.86327	0.56725	0.73133	0.9085	0.78124	0.50112
VVD1	0.41713	0.29776	0.25165	0.00195	0.1602	0.22156	0.12652	0.15932	0.05874	0.05225	0.16364	0.23567	0.03292	0.1274	0.03205	0.31472	0.47071	0.59905	0.56295	0.47843	0.30285	0.21086	0.07631	0.10332	0.04551	0.03941	0.32364	0.34139	0.07469	0.09488	0.2542	0.28862	0.40355	0.43124	0.48327	0.68726	0.52493	0.51328	0.37037	0.35822	0.19257	0.0609	0.56074	0.80961	0.60419	0.7893	0.95491	0.87453	0.6455
VVD1	0.34515	0.21705	0.16779	0.09023	0.26173	0.31899	0.22865	0.26053	0.14912	0.13547	0.09098	0.16755	0.04128	0.05638	0.10312	0.3852	0.5508	0.67056	0.63936	0.55496	0.38407	0.30042	0.16575	0.01028	0.04817	0.06566	0.4232	0.43862	0.17849	0.20041	0.35658	0.38867	0.49189	0.51645	0.55238	0.72342	0.55791	0.54185	0.39476	0.38997	0.23054	0.02437	0.55724	0.81158	0.66579	0.83916	0.96424	0.89643	0.69802
VVD1	0.30737	0.18107	0.11753	0.17266	0.37945	0.48912	0.40677	0.44159	0.3852	0.38673	0.1833	0.10899	0.3086	0.21489	0.36321	0.60801	0.70884	0.79482	0.76894	0.72533	0.59576	0.51187	0.40079	0.23012	0.28321	0.25323	0.49701	0.50595	0.2486	0.2994	0.44517	0.47536	0.52649	0.51606	0.47373	0.58152	0.37783	0.35106	0.18482	0.19057	0.03741	0.20498	0.33988	0.66441	0.66848	0.86005	0.95563	0.96335	0.85877
VVD1	0.15258	0.02743	0.04201	0.33602	0.55371	0.67514	0.61211	0.64407	0.60707	0.60529	0.41773	0.34495	0.52986	0.44241	0.57151	0.77332	0.84435	0.89238	0.87804	0.86039	0.77114	0.70742	0.61921	0.47205	0.5187	0.48141	0.63484	0.63673	0.41275	0.47567	0.60119	0.62521	0.62689	0.59305	0.48909	0.50555	0.2952	0.25833	0.09043	0.11164	0.01448	0.22912	0.18996	0.52854	0.69715	0.86489	0.87795	0.9425	0.94114
VVD1	0.07367	0.05198	0.12329	0.40827	0.62977	0.75108	0.70292	0.72986	0.6911	0.68599	0.50324	0.43099	0.60762	0.5238	0.64306	0.82279	0.88827	0.91845	0.91161	0.90152	0.83029	0.78017	0.70186	0.57215	0.61219	0.58091	0.69852	0.69564	0.49687	0.55991	0.67402	0.69183	0.67882	0.64031	0.51484	0.48572	0.28085	0.24256	0.08156	0.1051	0.0018	0.18936	0.15513	0.48425	0.7319	0.87221	0.83084	0.91448	0.95599
VVD1	0.02424	0.07986	0.15352	0.42922	0.64712	0.80115	0.76934	0.79342	0.82183	0.83	0.70312	0.64621	0.7826	0.71833	0.80494	0.91545	0.90343	0.89453	0.89335	0.92629	0.90967	0.86822	0.82911	0.7237	0.75198	0.67673	0.65924	0.65314	0.49111	0.57162	0.65961	0.67347	0.59599	0.52987	0.34444	0.25565	0.04446	0.00114	0.1567	0.12494	0.2085	0.36265	0.10811	0.23667	0.58893	0.73268	0.67449	0.82147	0.95471
VVD1	0.02596	0.12454	0.20096	0.46504	0.6679	0.82077	0.78486	0.81431	0.85447	0.86532	0.75205	0.69832	0.82404	0.76504	0.84365	0.93393	0.90111	0.88084	0.88035	0.92664	0.92425	0.88698	0.85754	0.75833	0.78421	0.70158	0.65121	0.64317	0.48823	0.58402	0.65865	0.6687	0.57534	0.50684	0.30741	0.20283	0.00845	0.05362	0.20697	0.17607	0.25355	0.39592	0.1733	0.17578	0.55935	0.69336	0.62855	0.79256	0.94832
VVD1	0.05047	0.12419	0.20382	0.4412	0.62413	0.79546	0.76589	0.79513	0.88231	0.91027	0.84508	0.80576	0.89395	0.85205	0.9039	0.93677	0.83929	0.79281	0.79617	0.87586	0.91364	0.88056	0.88117	0.8031	0.81682	0.69787	0.54766	0.53455	0.40448	0.52329	0.57532	0.58025	0.45181	0.36503	0.13493	0.00655	0.20124	0.24662	0.38443	0.35404	0.41593	0.51544	0.35468	0.00352	0.42912	0.55541	0.49394	0.69813	0.90145
VVD1	0.12482	0.18437	0.26019	0.46759	0.63347	0.80221	0.79094	0.81068	0.91446	0.94202	0.90767	0.87769	0.93517	0.90576	0.93035	0.91759	0.79636	0.72711	0.73869	0.8332	0.90156	0.88551	0.91032	0.86015	0.86272	0.74115	0.52803	0.51028	0.42009	0.53575	0.57333	0.56651	0.41053	0.31874	0.07372	0.09521	0.28336	0.32871	0.45057	0.41596	0.44915	0.50665	0.44685	0.13018	0.35781	0.45881	0.35897	0.58201	0.83265
VVD1	0.01297	0.05257	0.1288	0.32869	0.49327	0.69205	0.68482	0.69639	0.84431	0.89014	0.8907	0.87162	0.90792	0.88833	0.90222	0.86488	0.69802	0.62682	0.63331	0.74642	0.82906	0.80089	0.84069	0.79201	0.78747	0.62691	0.36857	0.3517	0.26453	0.38827	0.42349	0.41797	0.25066	0.14835	0.0995	0.23969	0.43279	0.47342	0.59261	0.56339	0.60063	0.63972	0.54415	0.22122	0.22322	0.35082	0.30509	0.53638	0.77916
VVD1	0.28188	0.31778	0.37666	0.52536	0.66107	0.80312	0.82665	0.83205	0.9438	0.96203	0.97114	0.95621	0.96913	0.96085	0.94644	0.86706	0.72952	0.62434	0.64897	0.75602	0.86736	0.88432	0.93935	0.94158	0.93013	0.82696	0.53465	0.51281	0.50542	0.60078	0.59426	0.5797	0.39747	0.29657	0.03573	0.21205	0.35175	0.39594	0.48279	0.43575	0.41869	0.41333	0.55569	0.3185	0.25535	0.29689	0.11396	0.35329	0.68024
VVD1	0.2396	0.32002	0.38261	0.58942	0.7674	0.89258	0.89422	0.90842	0.95002	0.94804	0.87348	0.83196	0.91299	0.87338	0.90811	0.92703	0.882	0.81842	0.83662	0.8974	0.94444	0.94717	0.95079	0.9089	0.92085	0.86211	0.71967	0.70307	0.63604	0.71506	0.74688	0.74458	0.61403	0.53206	0.30481	0.09708	0.06649	0.11437	0.23209	0.1839	0.20372	0.27553	0.29162	0.01951	0.4981	0.56172	0.38224	0.57527	0.83219
VVD1	0.49949	0.59453	0.62624	0.7476	0.8628	0.85934	0.88663	0.88572	0.79352	0.73656	0.61563	0.56537	0.64906	0.6068	0.63567	0.67689	0.76995	0.7182	0.75223	0.74513	0.75778	0.81127	0.79142	0.79171	0.80673	0.88866	0.88674	0.87017	0.87572	0.88315	0.89151	0.87557	0.8028	0.77862	0.64039	0.39449	0.33219	0.29276	0.23061	0.28324	0.31432	0.27026	0.05365	0.14825	0.63461	0.57452	0.25722	0.35459	0.57702
VVD1	0.18512	0.32524	0.36336	0.5527	0.69927	0.67803	0.65412	0.66104	0.47738	0.41256	0.18183	0.10081	0.27847	0.1926	0.30449	0.50982	0.72659	0.77511	0.78304	0.69751	0.58506	0.58773	0.48398	0.39563	0.43905	0.5604	0.8424	0.83996	0.71634	0.70561	0.79931	0.79577	0.84385	0.87404	0.85818	0.80671	0.71285	0.68498	0.58418	0.61144	0.5574	0.39296	0.53649	0.6674	0.84824	0.86204	0.69012	0.66077	0.64994
VVD1	0.14052	0.00154	0.04852	0.29407	0.46567	0.49098	0.42346	0.44576	0.29184	0.25424	0.00791	0.07663	0.13462	0.03432	0.18636	0.45694	0.66003	0.75892	0.74221	0.64989	0.48946	0.43702	0.30482	0.15358	0.21064	0.27691	0.63379	0.64222	0.42189	0.43015	0.57224	0.58871	0.6794	0.71086	0.73119	0.82112	0.67562	0.65361	0.51665	0.52374	0.39847	0.16311	0.59901	0.81526	0.7944	0.91108	0.91816	0.85822	0.7217
VVD1	0.2825	0.14952	0.10749	0.12245	0.27772	0.2972	0.21892	0.24153	0.08466	0.05455	0.18829	0.26873	0.05906	0.15846	0.000582	0.28959	0.50089	0.62583	0.59999	0.4934	0.30946	0.24179	0.09977	0.06256	0.00608	0.05604	0.46339	0.4771	0.23589	0.23642	0.3934	0.41628	0.54122	0.58817	0.65767	0.82316	0.68999	0.67911	0.55207	0.54315	0.40306	0.16366	0.68748	0.88059	0.72165	0.85324	0.93332	0.83054	0.61281
VVD1	0.32486	0.20051	0.16738	0.03752	0.16906	0.1695	0.08582	0.10841	0.05901	0.08863	0.32715	0.40311	0.19949	0.29583	0.13781	0.15722	0.38077	0.51948	0.49044	0.37169	0.1753	0.10451	0.04254	0.20431	0.14828	0.07669	0.36339	0.37953	0.14203	0.1319	0.2865	0.31113	0.45938	0.52057	0.6266	0.83032	0.71801	0.71392	0.6015	0.58459	0.44144	0.20551	0.74843	0.90806	0.66521	0.79125	0.90238	0.76846	0.50507
VVD1	0.36536	0.24752	0.2173	0.01438	0.1096	0.1128	0.02077	0.04847	0.10794	0.13392	0.36405	0.43672	0.23541	0.32949	0.17097	0.12561	0.34029	0.48449	0.45032	0.33315	0.13383	0.05567	0.09194	0.25844	0.19881	0.13752	0.30284	0.32288	0.07997	0.07062	0.22317	0.25396	0.40668	0.46763	0.57966	0.80259	0.68891	0.68616	0.57239	0.55567	0.40388	0.16249	0.73694	0.90173	0.61915	0.75651	0.90018	0.76229	0.48232
VVD1	0.42163	0.31689	0.29497	0.12198	0.02016	0.02859	0.11704	0.09372	0.25127	0.27425	0.49073	0.5569	0.36968	0.45724	0.30511	0.01481	0.20188	0.35533	0.3187	0.19469	0.0097	0.08925	0.23501	0.39487	0.33825	0.27272	0.18313	0.2051	0.02734	0.0515	0.1004	0.13118	0.30061	0.37231	0.51649	0.77235	0.68115	0.68569	0.58934	0.56352	0.41617	0.18865	0.77255	0.8972	0.5355	0.66829	0.84262	0.67683	0.3586
VVD1	0.43471	0.32883	0.30534	0.12378	0.0129	0.0113	0.10094	0.07671	0.22641	0.24658	0.46226	0.52822	0.33898	0.42717	0.27344	0.01862	0.22779	0.38015	0.34225	0.22193	0.01972	0.06288	0.20854	0.37173	0.31475	0.25855	0.18787	0.20947	0.02863	0.04696	0.10576	0.1373	0.3068	0.37092	0.50657	0.76188	0.66248	0.66513	0.56301	0.53683	0.38736	0.15579	0.75082	0.89124	0.54052	0.68041	0.85928	0.70134	0.38856
VVD1	0.46356	0.36567	0.34657	0.18045	0.08267	0.08669	0.17537	0.1527	0.30007	0.31859	0.52428	0.5861	0.40603	0.49046	0.34069	0.05405	0.1533	0.30947	0.26991	0.14763	0.05562	0.13901	0.28229	0.44159	0.38646	0.32976	0.12105	0.14312	0.08985	0.11512	0.03665	0.06874	0.24492	0.314	0.46499	0.73743	0.64941	0.65624	0.56334	0.53088	0.38437	0.16141	0.75991	0.87943	0.48866	0.62707	0.82333	0.65275	0.32186
VVD1	0.53634	0.43862	0.40819	0.20843	0.08515	0.04553	0.13654	0.11066	0.21655	0.21916	0.41417	0.47473	0.29272	0.3761	0.22307	0.05518	0.22074	0.36955	0.32588	0.22593	0.03523	0.06235	0.19831	0.36997	0.31624	0.30211	0.10064	0.12339	0.12777	0.13233	0.02231	0.05765	0.21412	0.26407	0.37958	0.65197	0.52859	0.53104	0.41867	0.38772	0.22547	0.00884	0.64366	0.82381	0.46402	0.64139	0.86834	0.73283	0.42399
VVD1	0.43192	0.31378	0.27099	0.02832	0.12941	0.18409	0.08922	0.12636	0.0215	0.01497	0.20069	0.27163	0.06817	0.16228	0.000789	0.28547	0.44844	0.58057	0.54245	0.45315	0.27313	0.17894	0.04097	0.13857	0.08049	0.07134	0.30067	0.32111	0.05712	0.07405	0.22618	0.26447	0.39141	0.42141	0.48138	0.69196	0.5354	0.52613	0.38792	0.37092	0.20512	0.05356	0.56806	0.81166	0.5862	0.76894	0.9439	0.85704	0.61584
Linker	0.30532	0.17603	0.11748	0.16082	0.35528	0.44366	0.3533	0.39692	0.32297	0.32061	0.10914	0.03443	0.24148	0.14557	0.30051	0.56303	0.68461	0.78106	0.75107	0.69438	0.55114	0.46406	0.34228	0.16662	0.22269	0.20468	0.48072	0.49531	0.23442	0.28561	0.42578	0.46347	0.53374	0.52936	0.50454	0.62567	0.43066	0.40669	0.2446	0.2477	0.08817	0.17117	0.37958	0.69626	0.66226	0.84755	0.95723	0.94913	0.81904
Linker	0.22678	0.09555	0.03434	0.25275	0.45192	0.54293	0.45355	0.49965	0.43174	0.42674	0.21708	0.1424	0.34863	0.25413	0.40552	0.65606	0.76626	0.84773	0.8221	0.77543	0.64619	0.56626	0.45007	0.28026	0.33568	0.31329	0.55627	0.56928	0.3155	0.37727	0.50568	0.54305	0.59557	0.58146	0.53	0.61309	0.41107	0.38144	0.21386	0.22491	0.07105	0.18593	0.31905	0.65282	0.69292	0.86806	0.94394	0.9628	0.87516
Linker	0.2198	0.08729	0.02748	0.25974	0.46161	0.55005	0.46063	0.5055	0.43267	0.42566	0.21359	0.13859	0.34684	0.25219	0.40534	0.65723	0.77152	0.85342	0.82841	0.78031	0.64913	0.57013	0.45206	0.28258	0.33897	0.31966	0.56637	0.57911	0.32699	0.38772	0.5131	0.55246	0.6109	0.59704	0.5458	0.6273	0.42657	0.39632	0.23056	0.24044	0.08804	0.16794	0.3323	0.66564	0.71048	0.87949	0.94902	0.96628	0.87798
Linker	0.27903	0.15146	0.09174	0.19516	0.39321	0.4875	0.39394	0.43899	0.37326	0.37145	0.16304	0.0894	0.29636	0.20294	0.35871	0.61316	0.72196	0.81129	0.78231	0.73461	0.59768	0.51112	0.39138	0.21621	0.27348	0.24652	0.50196	0.51617	0.25566	0.31592	0.4462	0.48626	0.55326	0.54367	0.50364	0.61084	0.40857	0.38104	0.21618	0.22097	0.06155	0.19734	0.344	0.67845	0.67774	0.85859	0.96006	0.96809	0.85514
Linker	0.25195	0.12384	0.06182	0.22881	0.43189	0.53325	0.44155	0.48642	0.42902	0.42853	0.22459	0.15132	0.35624	0.26421	0.4166	0.66238	0.75996	0.84093	0.81385	0.77333	0.64626	0.56183	0.44686	0.27487	0.33096	0.29824	0.52906	0.54252	0.28752	0.35328	0.4777	0.51701	0.57138	0.5543	0.49638	0.58364	0.37684	0.34758	0.18013	0.18821	0.03201	0.2239	0.29614	0.64114	0.67718	0.85713	0.94613	0.97062	0.88233
Linker	0.31012	0.19067	0.12486	0.16757	0.36996	0.49191	0.39917	0.44372	0.41346	0.42453	0.23759	0.16892	0.36428	0.27652	0.42389	0.65686	0.72576	0.80474	0.77464	0.74686	0.62852	0.5365	0.43012	0.25598	0.30887	0.25144	0.45389	0.46709	0.20711	0.28115	0.40843	0.44759	0.49105	0.46743	0.40187	0.50272	0.28699	0.259	0.08943	0.09459	0.06652	0.31608	0.23261	0.59103	0.61265	0.81218	0.93192	0.96678	0.87851
Linker	0.31306	0.20208	0.1316	0.16187	0.36625	0.50897	0.41811	0.46394	0.46401	0.48474	0.31837	0.25445	0.43674	0.35444	0.49131	0.7007	0.73418	0.79999	0.77109	0.76254	0.66417	0.57072	0.47887	0.30932	0.35782	0.27574	0.42513	0.43614	0.18043	0.26693	0.39042	0.42861	0.44685	0.41078	0.31999	0.40627	0.18043	0.15028	0.02125	0.01369	0.17188	0.40768	0.12852	0.50487	0.56347	0.77182	0.89513	0.95695	0.89932
Linker	0.28689	0.18495	0.11069	0.18061	0.38598	0.54509	0.45805	0.50565	0.5341	0.56246	0.41759	0.35877	0.52575	0.44945	0.57336	0.75519	0.75397	0.80211	0.77635	0.78784	0.71324	0.6227	0.54728	0.38709	0.43053	0.32755	0.41723	0.42483	0.178	0.27693	0.39342	0.42966	0.42159	0.37115	0.25147	0.31129	0.07834	0.04493	0.12624	0.11492	0.26436	0.48147	0.02002	0.41025	0.52476	0.73391	0.8459	0.93787	0.921
Linker	0.25067	0.151	0.07668	0.2139	0.42398	0.58864	0.50812	0.55494	0.59303	0.62169	0.48526	0.42864	0.58922	0.5164	0.63336	0.80031	0.78669	0.82277	0.80003	0.82029	0.75919	0.67389	0.60627	0.45458	0.49581	0.38764	0.44459	0.45073	0.2159	0.31763	0.42519	0.46226	0.44211	0.38259	0.24395	0.27677	0.04269	0.00586	0.16504	0.14876	0.28882	0.49611	0.03235	0.36228	0.5224	0.72399	0.81504	0.92475	0.93812
Linker	0.18675	0.08525	0.01185	0.27691	0.48599	0.64491	0.56611	0.61501	0.65112	0.6753	0.53926	0.48226	0.64135	0.56964	0.68314	0.84295	0.82996	0.85691	0.83725	0.85982	0.80668	0.72886	0.66397	0.51934	0.56092	0.45861	0.50012	0.50534	0.28094	0.38413	0.4817	0.51889	0.49028	0.42604	0.27449	0.27885	0.04723	0.00698	0.16376	0.14107	0.27286	0.4778	0.05684	0.33736	0.53973	0.72917	0.79282	0.91407	0.95372
Linker	0.18281	0.07472	0.000787	0.29153	0.50279	0.65368	0.57558	0.62242	0.64082	0.66005	0.5095	0.44853	0.61677	0.5406	0.66029	0.83385	0.84043	0.87389	0.8543	0.86722	0.80355	0.72668	0.65418	0.50595	0.54883	0.46009	0.53036	0.53614	0.30782	0.40498	0.50951	0.54413	0.52525	0.46851	0.3271	0.3365	0.10669	0.06716	0.10449	0.08273	0.21603	0.42834	0.00162	0.38974	0.58263	0.7679	0.8241	0.93317	0.96003
Linker	0.21374	0.10111	0.02669	0.2673	0.48022	0.6266	0.54763	0.59245	0.59708	0.61459	0.45233	0.38815	0.56417	0.48382	0.61053	0.79902	0.82189	0.86558	0.84471	0.84786	0.771	0.69138	0.6111	0.45695	0.50059	0.42058	0.52298	0.52945	0.29234	0.38332	0.49867	0.53197	0.52616	0.47834	0.35338	0.3822	0.15382	0.11706	0.05445	0.03793	0.17568	0.3946	0.06415	0.44567	0.60663	0.7943	0.85934	0.95126	0.95219
Linker	0.14825	0.03056	0.03934	0.32997	0.53373	0.65891	0.57148	0.62286	0.60874	0.61577	0.44153	0.37353	0.55697	0.47441	0.60467	0.80412	0.84979	0.89541	0.87503	0.86769	0.78364	0.7101	0.62222	0.46818	0.51898	0.46127	0.58788	0.59593	0.35977	0.44589	0.5546	0.59252	0.59235	0.54827	0.43029	0.44659	0.22687	0.18715	0.01492	0.03723	0.09791	0.32817	0.1084	0.47996	0.64428	0.81929	0.86525	0.94928	0.9506
Linker	0.28361	0.16998	0.10661	0.18213	0.38928	0.5204	0.43083	0.48047	0.46395	0.47597	0.29764	0.23037	0.41843	0.33397	0.47362	0.69495	0.75253	0.82023	0.79223	0.77115	0.66571	0.57837	0.47991	0.31635	0.37132	0.31273	0.48416	0.49614	0.24776	0.31278	0.43385	0.47809	0.51611	0.48151	0.39951	0.4715	0.25636	0.22121	0.05087	0.06295	0.08236	0.3223	0.19843	0.5581	0.61467	0.80709	0.9089	0.95713	0.8932
Linker	0.3242	0.21509	0.16323	0.11645	0.31626	0.44021	0.35163	0.40033	0.38237	0.39202	0.2151	0.15015	0.33635	0.25283	0.3937	0.62453	0.69456	0.77263	0.74104	0.70836	0.59325	0.50269	0.39982	0.23683	0.29629	0.24584	0.44196	0.45911	0.22093	0.26073	0.37919	0.42668	0.48232	0.45394	0.39492	0.48668	0.28458	0.25001	0.08273	0.09657	0.05045	0.29702	0.24377	0.58002	0.57539	0.77587	0.89936	0.9244	0.83287
Linker	0.3527	0.25281	0.20467	0.0636	0.26425	0.40132	0.32071	0.3674	0.37526	0.392	0.23726	0.17929	0.34933	0.272	0.40321	0.61556	0.65951	0.73096	0.69837	0.67597	0.57492	0.48205	0.3917	0.23528	0.29114	0.2229	0.38116	0.39963	0.17623	0.21247	0.32309	0.37435	0.41173	0.37391	0.30645	0.39622	0.19573	0.15991	0.00497	0.0133	0.1291	0.36375	0.16943	0.50279	0.49451	0.70759	0.84682	0.88153	0.8036
Linker	0.2756	0.17585	0.12609	0.14363	0.33914	0.47737	0.40466	0.45083	0.47547	0.48743	0.34855	0.29365	0.45066	0.37911	0.49642	0.68586	0.71155	0.76442	0.73554	0.7256	0.64649	0.56427	0.48804	0.34263	0.3961	0.32367	0.43626	0.45601	0.25352	0.29139	0.39027	0.43243	0.42632	0.38194	0.28759	0.3347	0.13404	0.09535	0.07288	0.04023	0.17393	0.40273	0.06307	0.39582	0.45511	0.66785	0.77448	0.83493	0.81502
Linker	0.22272	0.17634	0.13809	0.07805	0.24105	0.41586	0.3692	0.41203	0.53948	0.57366	0.54204	0.52004	0.5971	0.56541	0.61949	0.69053	0.59821	0.5953	0.57399	0.6233	0.62992	0.5618	0.54873	0.45933	0.49289	0.36104	0.26448	0.28235	0.17405	0.22044	0.24959	0.28559	0.20996	0.12201	0.03766	0.0685	0.24355	0.28418	0.42369	0.37859	0.47007	0.61757	0.32741	0.01618	0.14705	0.34291	0.43456	0.57208	0.6737
Linker	0.11702	0.12867	0.11915	0.02605	0.04958	0.17953	0.16506	0.20342	0.36291	0.39919	0.46116	0.4754	0.46746	0.47783	0.46425	0.43474	0.29685	0.2597	0.2476	0.31546	0.3777	0.34042	0.37411	0.36044	0.37135	0.24392	0.03051	0.05022	0.06324	0.08287	0.02776	0.06489	0.01465	0.11452	0.26109	0.33727	0.42393	0.45523	0.52672	0.4767	0.50649	0.55061	0.48507	0.30627	0.15763	0.03409	0.02878	0.16732	0.31102
Linker	0.00622	0.05304	0.03276	0.00224	0.02544	0.15621	0.16779	0.19073	0.40132	0.45646	0.59192	0.63033	0.5565	0.59711	0.53407	0.39989	0.1738	0.08876	0.08664	0.20589	0.33474	0.31939	0.40414	0.43295	0.41626	0.24919	0.11168	0.10458	0.03487	0.03052	0.06501	0.05513	0.20124	0.30536	0.49191	0.61649	0.68495	0.70891	0.74235	0.698	0.69402	0.6499	0.74546	0.59897	0.34873	0.26497	0.23498	0.0439	0.18282
Linker	0.02119	0.07829	0.05767	0.04988	0.02093	0.11841	0.15332	0.16484	0.38477	0.44924	0.60249	0.64658	0.55217	0.59976	0.52374	0.35811	0.11331	0.01425	0.02085	0.15109	0.29718	0.28935	0.38769	0.43873	0.40855	0.23675	0.16212	0.16371	0.06822	0.01384	0.10867	0.11216	0.25899	0.36269	0.55239	0.69086	0.74597	0.76591	0.77784	0.74169	0.71715	0.63174	0.77357	0.65556	0.37914	0.3161	0.30907	0.11396	0.12858
Linker	0.26081	0.21329	0.23143	0.18103	0.17901	0.25138	0.28086	0.29693	0.45363	0.50002	0.63134	0.66653	0.57536	0.62293	0.54684	0.37381	0.16821	0.05142	0.07223	0.19109	0.34271	0.36423	0.45224	0.53185	0.50541	0.39931	0.01147	0.00544	0.13134	0.19786	0.04818	0.0352	0.08496	0.17427	0.36463	0.57557	0.59344	0.61003	0.59013	0.55335	0.49915	0.38284	0.69504	0.6222	0.23474	0.26348	0.37313	0.17755	0.10405
VVD2	0.0041	0.01192	0.00883	0.02195	0.00105	0.03383	0.02188	0.04915	0.07681	0.12159	0.13409	0.13486	0.13871	0.14727	0.16458	0.14809	0.08131	0.06076	0.06412	0.09581	0.12511	0.10346	0.09127	0.11613	0.11379	0.08614	0.01261	0.0308	0.01782	0.04592	0.07828	0.08498	0.00733	0.02832	0.08231	0.11709	0.13334	0.12461	0.11281	0.11737	0.11226	0.06688	0.08565	0.02245	0.08043	0.05792	0.03664	0.08464	0.12279
VVD2	0.0035	0.06108	0.02484	0.06754	0.07012	0.03257	0.0206	0.04223	0.20336	0.28541	0.40018	0.42699	0.35918	0.39557	0.36207	0.2303	0.00699	0.06749	0.06228	0.05533	0.16595	0.14217	0.19927	0.2338	0.21274	0.07358	0.237	0.26829	0.24559	0.13523	0.24257	0.24433	0.28237	0.36074	0.49488	0.55587	0.6077	0.60333	0.59714	0.60332	0.59102	0.48956	0.53971	0.42029	0.22663	0.20691	0.1678	0.0199	0.11768
VVD2	0.4293	0.49808	0.4568	0.47426	0.44089	0.27535	0.25716	0.26669	0.0755	0.0326	0.15556	0.19062	0.11841	0.15119	0.12266	0.01273	0.22004	0.25507	0.26187	0.15332	0.07282	0.13058	0.07267	0.06439	0.1007	0.28731	0.54802	0.57368	0.59332	0.50846	0.53407	0.5445	0.55588	0.61514	0.69288	0.61639	0.68368	0.66733	0.66365	0.70301	0.71765	0.61194	0.44917	0.33517	0.33864	0.25068	0.08049	0.01548	0.03
VVD2	0.3215	0.41459	0.38536	0.41473	0.40565	0.22893	0.18576	0.20183	0.052	0.1536	0.34081	0.39673	0.27602	0.33598	0.26257	0.07675	0.21751	0.29276	0.29899	0.15593	0.01815	0.05558	0.04634	0.08565	0.04199	0.17566	0.56461	0.5787	0.52512	0.4368	0.50104	0.52336	0.61858	0.70437	0.83137	0.83358	0.88901	0.8843	0.87471	0.89605	0.88075	0.7531	0.73702	0.63202	0.53854	0.46049	0.31793	0.16522	0.04189
VVD2	0.46219	0.54977	0.51778	0.51504	0.49912	0.3101	0.29812	0.30647	0.05317	0.05208	0.22139	0.27204	0.17375	0.22157	0.17008	0.02765	0.25457	0.29641	0.31494	0.18664	0.08266	0.14305	0.0569	0.0562	0.09176	0.32832	0.64929	0.65627	0.66563	0.57254	0.5971	0.59517	0.67988	0.75667	0.85397	0.77403	0.85084	0.84289	0.85309	0.88162	0.90628	0.8179	0.64416	0.51023	0.53835	0.40641	0.17854	0.05572	0.01024
VVD2	0.57798	0.67001	0.65349	0.67872	0.68131	0.50966	0.49586	0.5186	0.2854	0.18659	0.01832	0.03434	0.06848	0.02084	0.06802	0.19545	0.44662	0.46127	0.48686	0.38058	0.3059	0.37153	0.29328	0.29868	0.33251	0.55044	0.79765	0.79909	0.81157	0.74442	0.74776	0.74099	0.79886	0.84926	0.87959	0.72867	0.77738	0.75764	0.75149	0.79341	0.82104	0.73084	0.49946	0.42474	0.6027	0.47019	0.19041	0.12972	0.17016
VVD2	0.61179	0.70241	0.68994	0.70798	0.72073	0.56304	0.55656	0.5767	0.35674	0.26341	0.10427	0.05211	0.1463	0.0999	0.1421	0.25063	0.47952	0.47885	0.50915	0.41833	0.36012	0.4298	0.3622	0.37644	0.40559	0.61451	0.81769	0.81207	0.83352	0.77693	0.77266	0.76265	0.80847	0.84931	0.85795	0.67928	0.72257	0.69972	0.69591	0.73682	0.77662	0.70739	0.43985	0.376	0.61865	0.47649	0.1697	0.13199	0.20641
VVD2	0.63129	0.69218	0.65193	0.60196	0.54929	0.34491	0.35474	0.36244	0.13603	0.02884	0.08961	0.12068	0.0658	0.08855	0.07382	0.00343	0.23419	0.23548	0.2639	0.16095	0.10968	0.19558	0.14124	0.18619	0.20694	0.43439	0.64216	0.64703	0.72848	0.64148	0.60572	0.5942	0.64774	0.70689	0.76814	0.60829	0.71432	0.70328	0.73433	0.7762	0.84286	0.80692	0.45658	0.28053	0.41476	0.24072	0.05125	0.13328	0.08665
VVD2	0.56595	0.65431	0.62527	0.63738	0.63187	0.45004	0.44499	0.45768	0.21815	0.10933	0.0515	0.09723	0.000361	0.04044	0.00619	0.12839	0.38913	0.40914	0.43149	0.31702	0.23817	0.30648	0.22703	0.23569	0.26835	0.48995	0.74956	0.75862	0.79147	0.71552	0.69903	0.69702	0.76226	0.81969	0.87122	0.73355	0.80011	0.7851	0.78052	0.82432	0.85614	0.76588	0.52266	0.41594	0.55145	0.41237	0.14179	0.06271	0.08829
VVD2	0.61268	0.67325	0.62956	0.57717	0.52872	0.32455	0.34066	0.34156	0.1112	0.00126	0.11755	0.14791	0.09302	0.11442	0.09897	0.02664	0.21734	0.22236	0.24967	0.14144	0.0867	0.17213	0.11545	0.16061	0.18234	0.41273	0.62849	0.63609	0.7261	0.63459	0.59029	0.58148	0.64186	0.70423	0.77214	0.61853	0.73191	0.72499	0.75721	0.79767	0.86223	0.8266	0.47558	0.2919	0.41149	0.23034	0.05705	0.14592	0.10818
VVD2	0.6065	0.67664	0.63902	0.61257	0.57993	0.38655	0.39833	0.40419	0.17486	0.06481	0.06664	0.10185	0.03282	0.06048	0.03549	0.05049	0.29763	0.30352	0.32946	0.22197	0.16322	0.24335	0.18069	0.21486	0.23949	0.46414	0.6838	0.69324	0.77031	0.68698	0.65034	0.64432	0.70034	0.75691	0.81026	0.64924	0.74332	0.73105	0.74904	0.79261	0.8477	0.79216	0.46511	0.31281	0.45579	0.28868	0.000525	0.07786	0.0309
VVD2	0.60734	0.68442	0.65229	0.65042	0.62911	0.44616	0.45129	0.46139	0.23486	0.12399	0.01681	0.05566	0.02592	0.00567	0.02701	0.12343	0.36927	0.37674	0.39983	0.29424	0.23258	0.30789	0.2407	0.26326	0.29093	0.50676	0.72738	0.74047	0.80291	0.73093	0.69894	0.6947	0.74549	0.79627	0.83495	0.66918	0.74467	0.72977	0.73169	0.77875	0.82395	0.74829	0.44815	0.32514	0.48531	0.33515	0.05227	0.01434	0.04025
VVD2	0.54131	0.61822	0.58005	0.56597	0.52942	0.32883	0.32489	0.33551	0.08812	0.02465	0.17703	0.21868	0.13245	0.16874	0.1284	0.00819	0.26479	0.29469	0.31361	0.18872	0.102	0.1716	0.09252	0.10692	0.13987	0.37484	0.66023	0.6738	0.72095	0.63206	0.61609	0.60918	0.69126	0.76144	0.84582	0.73244	0.82218	0.81385	0.82433	0.8614	0.89651	0.81425	0.57039	0.4178	0.47864	0.33251	0.08472	0.02482	0.03386
VVD2	0.47367	0.56356	0.53043	0.54283	0.52549	0.33469	0.32055	0.33172	0.07517	0.03683	0.21321	0.2633	0.15477	0.20267	0.14352	0.01084	0.30171	0.34824	0.36229	0.22767	0.11884	0.17482	0.08007	0.07185	0.11328	0.34932	0.67956	0.69508	0.71166	0.62411	0.6302	0.62983	0.72603	0.79918	0.89261	0.80909	0.87982	0.87025	0.8657	0.89853	0.91274	0.80233	0.63916	0.5155	0.54177	0.41816	0.19715	0.07512	0.03308
VVD2	0.4485	0.55658	0.53668	0.60489	0.626	0.46672	0.44237	0.45837	0.21372	0.10486	0.09227	0.15104	0.01525	0.07363	0.00405	0.18156	0.46609	0.51401	0.52425	0.39661	0.28278	0.32518	0.22082	0.18671	0.23533	0.44902	0.7756	0.79397	0.77865	0.71444	0.73212	0.73798	0.81977	0.87806	0.93624	0.84437	0.87189	0.85456	0.81644	0.8562	0.8465	0.69799	0.598	0.5469	0.62156	0.53431	0.3223	0.22888	0.207
VVD2	0.38784	0.49682	0.4761	0.55232	0.56726	0.40542	0.36862	0.38909	0.13832	0.03058	0.17654	0.2381	0.09307	0.15644	0.06927	0.12911	0.42638	0.49111	0.49631	0.35853	0.22641	0.25937	0.14508	0.09643	0.14994	0.36491	0.73399	0.75517	0.71531	0.64624	0.68266	0.68976	0.78629	0.85493	0.93594	0.88392	0.90822	0.89429	0.85072	0.88432	0.85851	0.69301	0.65806	0.60654	0.61507	0.54719	0.3729	0.25771	0.19428
VVD2	0.28242	0.38341	0.35456	0.40349	0.39908	0.22099	0.18037	0.19568	0.06992	0.17408	0.38021	0.43837	0.29889	0.36114	0.2712	0.05898	0.25564	0.34299	0.34327	0.18845	0.03434	0.06039	0.06225	0.11347	0.05965	0.16769	0.59315	0.6142	0.56642	0.47685	0.52528	0.53125	0.66607	0.75589	0.89222	0.90704	0.95407	0.94984	0.92419	0.9425	0.912	0.75438	0.77674	0.68284	0.56513	0.49638	0.3707	0.2056	0.06545
VVD2	0.19104	0.31162	0.30137	0.42358	0.46731	0.33387	0.2732	0.30043	0.05232	0.04165	0.27658	0.3468	0.17032	0.24913	0.13079	0.12205	0.42754	0.52555	0.51747	0.36932	0.20018	0.20073	0.06208	0.02876	0.03585	0.23041	0.66855	0.69158	0.58655	0.52574	0.59829	0.61335	0.74389	0.81834	0.92232	0.95591	0.94362	0.931	0.86333	0.88568	0.81488	0.60554	0.75841	0.76551	0.66899	0.65544	0.56851	0.42949	0.28608
VVD2	0.00709	0.11999	0.12941	0.32843	0.41528	0.3484	0.26429	0.3017	0.09942	0.02759	0.21635	0.2924	0.08852	0.17985	0.03432	0.24836	0.51604	0.63057	0.60898	0.47808	0.29591	0.25852	0.11026	0.02751	0.04425	0.17572	0.61265	0.64053	0.45986	0.43069	0.54508	0.57071	0.69014	0.75086	0.82978	0.92193	0.84179	0.82584	0.71424	0.7311	0.61208	0.35598	0.70125	0.8149	0.68222	0.75318	0.76173	0.64608	0.47379
VVD2	0.05609	0.05452	0.04572	0.18106	0.22314	0.1136	0.03937	0.06207	0.16765	0.24462	0.47428	0.54124	0.36046	0.43949	0.30538	0.03186	0.26255	0.39413	0.37148	0.21778	0.02117	0.00754	0.15684	0.27628	0.21017	0.0464	0.44331	0.4728	0.31828	0.25354	0.36565	0.38526	0.54267	0.63318	0.7847	0.92936	0.90427	0.90276	0.82951	0.82975	0.7295	0.50492	0.83116	0.84676	0.57892	0.61796	0.64962	0.469	0.22453
VVD2	0.09699	0.00904	0.00095	0.12077	0.15576	0.04423	0.03122	0.00859	0.23859	0.31156	0.53703	0.60213	0.42598	0.504	0.37061	0.09571	0.19781	0.33528	0.3112	0.15468	0.04638	0.07833	0.22816	0.34699	0.28278	0.11899	0.38057	0.40922	0.25232	0.18425	0.29702	0.31664	0.487	0.58272	0.75073	0.91834	0.90009	0.90239	0.83561	0.83003	0.72791	0.51015	0.85809	0.86234	0.55508	0.59381	0.6444	0.4503	0.18128
VVD2	0.1931	0.1004	0.11272	0.00689	0.01334	0.09122	0.17043	0.14914	0.36169	0.42367	0.63211	0.69151	0.52876	0.60273	0.47556	0.20399	0.07362	0.22095	0.19181	0.03714	0.16657	0.20788	0.35342	0.47432	0.4117	0.26049	0.24299	0.2715	0.1071	0.03489	0.15459	0.17352	0.35407	0.45311	0.64389	0.85588	0.84409	0.85276	0.7938	0.77853	0.66963	0.46236	0.85961	0.84977	0.46314	0.51891	0.621	0.40998	0.10319
VVD2	0.20523	0.09652	0.0984	0.05049	0.10738	0.03042	0.0572	0.0308	0.23259	0.29008	0.51439	0.58144	0.39787	0.48075	0.3397	0.05192	0.21595	0.36149	0.33109	0.18468	0.02005	0.07151	0.22293	0.36239	0.29427	0.16133	0.33117	0.35977	0.17071	0.11756	0.24333	0.26761	0.43453	0.51919	0.67531	0.8747	0.82769	0.83046	0.74554	0.73664	0.61023	0.37747	0.81671	0.86875	0.53687	0.61795	0.72076	0.53902	0.25588
VVD2	0.14399	0.0224	0.01871	0.15982	0.24384	0.17877	0.08842	0.1188	0.08297	0.14447	0.38307	0.45617	0.25723	0.34629	0.19631	0.09686	0.36487	0.50026	0.47283	0.33243	0.1325	0.08275	0.07123	0.21668	0.14445	0.01643	0.45759	0.48599	0.29256	0.25254	0.37494	0.40511	0.55657	0.6283	0.74938	0.9096	0.84082	0.83454	0.73355	0.73455	0.60606	0.35758	0.77841	0.87213	0.62638	0.70809	0.7756	0.62328	0.38145
VVD2	0.08901	0.03998	0.04681	0.23956	0.34256	0.28784	0.19487	0.2301	0.03261	0.02934	0.27287	0.34957	0.1433	0.23451	0.08332	0.20839	0.47052	0.59536	0.57041	0.43759	0.24608	0.19854	0.04573	0.10009	0.02407	0.09906	0.54639	0.57286	0.38185	0.35303	0.46059	0.49758	0.64043	0.69862	0.78763	0.91317	0.83075	0.81803	0.70734	0.71541	0.58895	0.33505	0.73151	0.85897	0.68475	0.75981	0.80017	0.67612	0.47102
VVD2	0.05862	0.07612	0.09082	0.30434	0.42951	0.39339	0.30079	0.33729	0.15142	0.09256	0.15324	0.23165	0.01857	0.111	0.04444	0.33133	0.57649	0.68931	0.66621	0.54631	0.36545	0.31679	0.16713	0.0184	0.09367	0.19943	0.6113	0.63656	0.44468	0.43521	0.53641	0.57712	0.70285	0.74774	0.80277	0.89841	0.79477	0.77538	0.65416	0.66779	0.54019	0.28135	0.66562	0.83395	0.73504	0.81209	0.83071	0.73826	0.57054
VVD2	0.07412	0.06065	0.08466	0.31372	0.45053	0.436	0.34318	0.37998	0.21435	0.16424	0.07689	0.15499	0.06033	0.03199	0.12404	0.40417	0.62526	0.73123	0.70772	0.60252	0.43122	0.37531	0.22853	0.07399	0.14796	0.22901	0.60941	0.63358	0.42906	0.43667	0.53762	0.58125	0.69495	0.72954	0.76093	0.84993	0.72563	0.7047	0.5731	0.588	0.45103	0.18933	0.59342	0.79653	0.73011	0.82471	0.85265	0.78541	0.63665
VVD2	0.01638	0.15276	0.17633	0.41054	0.55473	0.54383	0.45859	0.4987	0.34522	0.29023	0.05844	0.01726	0.19231	0.10409	0.2505	0.51313	0.72167	0.80803	0.78868	0.69364	0.54357	0.49767	0.36047	0.21828	0.29024	0.36518	0.69527	0.72019	0.54097	0.55734	0.63702	0.68372	0.77164	0.78752	0.78212	0.81551	0.68771	0.65863	0.52184	0.55282	0.42762	0.16934	0.49744	0.71365	0.73625	0.81994	0.80509	0.77178	0.68364
VVD2	0.15372	0.02845	0.01751	0.18317	0.29911	0.26461	0.18319	0.21724	0.03479	0.01675	0.25025	0.32122	0.11298	0.19667	0.04499	0.24369	0.4841	0.60706	0.57675	0.45195	0.26757	0.2101	0.05565	0.0872	0.01506	0.08072	0.49433	0.52484	0.34516	0.32756	0.41283	0.46311	0.62719	0.66867	0.73894	0.86202	0.76796	0.75244	0.6423	0.6507	0.52153	0.2679	0.67964	0.83793	0.67055	0.74698	0.80619	0.69884	0.49631
VVD2	0.13171	0.03523	0.05383	0.08133	0.14395	0.06976	0.00183	0.03251	0.14942	0.20931	0.40018	0.4529	0.28301	0.34261	0.22083	0.03425	0.27873	0.39865	0.36628	0.2304	0.05841	0.01743	0.12333	0.22874	0.1604	0.04285	0.3546	0.39281	0.28191	0.22704	0.26839	0.32358	0.51369	0.5606	0.66499	0.78267	0.74976	0.74071	0.66818	0.67534	0.57831	0.36111	0.66993	0.73401	0.49257	0.52657	0.58895	0.45153	0.23867
VVD2	0.31164	0.38059	0.34675	0.44414	0.47095	0.38148	0.33969	0.3727	0.25343	0.1735	0.05953	0.02654	0.13019	0.10011	0.15484	0.28776	0.46417	0.49257	0.48277	0.39849	0.33062	0.3474	0.27316	0.23875	0.29486	0.40641	0.58017	0.61783	0.62961	0.59106	0.54971	0.59553	0.65023	0.64736	0.63339	0.52943	0.52585	0.49737	0.43364	0.48973	0.46487	0.31166	0.23756	0.26972	0.35157	0.32047	0.20791	0.19019	0.22618
VVD2	0.58988	0.60038	0.5824	0.60488	0.60876	0.57441	0.60277	0.61076	0.62362	0.57403	0.5962	0.60035	0.58616	0.6048	0.56406	0.48926	0.48107	0.38753	0.41038	0.43903	0.52705	0.59238	0.62695	0.68872	0.69566	0.72665	0.54133	0.5528	0.69186	0.70534	0.60028	0.60337	0.49002	0.42274	0.26294	0.03813	0.02782	0.06525	0.08621	0.0099	0.05924	0.06721	0.37435	0.36112	0.08317	0.00737	0.26628	0.12647	0.17568
VVD2	0.67691	0.68295	0.66273	0.6641	0.66668	0.62222	0.65079	0.66478	0.6708	0.62039	0.64111	0.64176	0.61859	0.6337	0.59005	0.49728	0.48673	0.37874	0.41594	0.45305	0.54853	0.62387	0.66547	0.73848	0.74791	0.79692	0.59874	0.59677	0.73411	0.74092	0.63852	0.63649	0.5073	0.44823	0.28482	0.04131	0.0198	0.05853	0.06578	0.01533	0.09483	0.11439	0.37312	0.37187	0.11649	0.00356	0.29162	0.14649	0.17611
VVD2	0.42869	0.46918	0.46511	0.54578	0.65446	0.67472	0.71244	0.71269	0.69967	0.65945	0.6183	0.60189	0.63907	0.62998	0.63579	0.62119	0.64527	0.56907	0.59501	0.61042	0.66179	0.7041	0.7068	0.7392	0.75609	0.78496	0.65381	0.65512	0.7519	0.76408	0.69487	0.70594	0.64761	0.57953	0.41289	0.13246	0.09849	0.05588	0.01579	0.07904	0.12454	0.09181	0.21512	0.12123	0.35076	0.2671	0.00557	0.13975	0.39963
VVD2	0.29389	0.42601	0.44223	0.59039	0.70896	0.63439	0.5843	0.6108	0.39662	0.32264	0.08953	0.01289	0.19183	0.10816	0.22322	0.44204	0.68779	0.73983	0.74973	0.64787	0.52316	0.5279	0.4081	0.32822	0.38654	0.53631	0.83879	0.83897	0.73818	0.73669	0.77456	0.79854	0.90029	0.93488	0.9356	0.8696	0.81375	0.78732	0.71258	0.74197	0.68409	0.51153	0.57821	0.6892	0.85589	0.80666	0.62537	0.58591	0.55937
VVD2	0.25268	0.38581	0.39313	0.53787	0.64268	0.5535	0.51097	0.53115	0.29811	0.21142	0.02863	0.104	0.08026	0.000302	0.11925	0.35382	0.63001	0.69861	0.70078	0.57757	0.43526	0.44105	0.31213	0.23078	0.28708	0.45397	0.80533	0.81874	0.72952	0.70256	0.74989	0.77287	0.88761	0.93462	0.9699	0.92758	0.88593	0.86281	0.78551	0.81363	0.75919	0.56826	0.66247	0.73784	0.82131	0.78095	0.61999	0.54503	0.47882
VVD2	0.22387	0.34955	0.34464	0.46681	0.54667	0.43438	0.39539	0.41129	0.16415	0.0699	0.16604	0.2377	0.06162	0.13886	0.02355	0.21601	0.51352	0.59481	0.59323	0.45295	0.29941	0.30886	0.17764	0.10253	0.15841	0.34593	0.73709	0.7556	0.67798	0.62597	0.68177	0.69911	0.82864	0.88859	0.96338	0.94921	0.93327	0.9162	0.85107	0.87489	0.82877	0.64136	0.73755	0.76053	0.76155	0.71572	0.572	0.4592	0.35502
VVD2	0.24859	0.37021	0.3624	0.46431	0.53212	0.40773	0.37736	0.38962	0.13396	0.03778	0.19333	0.2632	0.09686	0.17141	0.06465	0.16397	0.46646	0.5444	0.54648	0.40376	0.25444	0.27269	0.14625	0.0837	0.13466	0.33509	0.72591	0.74184	0.6794	0.6166	0.6693	0.68006	0.81059	0.87662	0.96165	0.94249	0.94258	0.9281	0.87592	0.8982	0.86466	0.69489	0.75458	0.74787	0.74718	0.68496	0.52401	0.40236	0.29916
VVD2	0.2452	0.36407	0.354	0.44724	0.50309	0.36939	0.34077	0.35112	0.09231	0.00528	0.23329	0.30201	0.14104	0.21441	0.11134	0.11488	0.42135	0.50167	0.50377	0.35824	0.20725	0.22803	0.10283	0.04242	0.09238	0.30027	0.70255	0.71797	0.6545	0.58427	0.64329	0.64785	0.77706	0.85033	0.94817	0.93935	0.94755	0.93588	0.88863	0.9094	0.87748	0.71117	0.76892	0.74369	0.7175	0.6557	0.50064	0.36798	0.25505
VVD2	0.20867	0.33102	0.32429	0.42681	0.49089	0.36478	0.33253	0.34386	0.08521	0.00836	0.24312	0.3145	0.14713	0.22438	0.11454	0.12029	0.4269	0.51236	0.51362	0.36787	0.21074	0.22535	0.09558	0.02717	0.07893	0.28355	0.69769	0.71195	0.6345	0.56537	0.63217	0.63766	0.77182	0.84643	0.94649	0.95259	0.95215	0.9403	0.88908	0.90643	0.86582	0.69318	0.78655	0.77492	0.73638	0.68465	0.54295	0.40766	0.28175
VVD2	0.20427	0.32293	0.31483	0.40746	0.45976	0.32514	0.29359	0.30478	0.04395	0.04957	0.27987	0.34916	0.18801	0.26332	0.15792	0.07274	0.38126	0.46824	0.4701	0.32174	0.16483	0.18192	0.05383	0.01087	0.03868	0.24883	0.66944	0.68311	0.60727	0.53291	0.60376	0.60235	0.73765	0.81748	0.929	0.94418	0.95203	0.94247	0.89842	0.9129	0.87531	0.70964	0.79636	0.76733	0.70876	0.65447	0.51649	0.37233	0.23805
VVD2	0.16906	0.28943	0.28311	0.38459	0.44048	0.31088	0.27508	0.28745	0.02898	0.06137	0.29545	0.36587	0.19954	0.27688	0.16656	0.07258	0.38098	0.47361	0.47275	0.32341	0.16071	0.17199	0.03983	0.03238	0.01893	0.22518	0.6567	0.67128	0.58547	0.51091	0.58717	0.58669	0.72716	0.80763	0.92147	0.95113	0.9522	0.94304	0.89465	0.90622	0.86083	0.68722	0.8071	0.78814	0.71085	0.66771	0.54681	0.39953	0.2524
VVD2	0.18971	0.30784	0.30095	0.39331	0.44195	0.3075	0.27502	0.28646	0.02777	0.06358	0.29276	0.36173	0.20178	0.2774	0.17305	0.05849	0.3652	0.45416	0.45522	0.30705	0.14951	0.16544	0.03763	0.0282	0.02028	0.22994	0.65468	0.66821	0.58876	0.51145	0.58764	0.58176	0.71744	0.79846	0.91363	0.93739	0.94475	0.93582	0.89226	0.90435	0.86507	0.6998	0.79738	0.76664	0.69601	0.64653	0.5167	0.36989	0.22995
VVD2	0.19731	0.31512	0.30989	0.39591	0.44545	0.31176	0.28253	0.29317	0.0329	0.0571	0.28563	0.35501	0.19766	0.27313	0.17105	0.05574	0.36071	0.44677	0.45013	0.30412	0.14928	0.16777	0.04213	0.01917	0.02659	0.23719	0.65566	0.66591	0.58952	0.51398	0.58844	0.58017	0.71632	0.79742	0.91244	0.93205	0.94164	0.93302	0.89378	0.90413	0.86945	0.71234	0.79894	0.76453	0.70503	0.64935	0.5101	0.3643	0.22773
VVD2	0.13992	0.26386	0.26571	0.37016	0.43623	0.31821	0.2827	0.29731	0.04185	0.04088	0.27841	0.3515	0.18298	0.26464	0.15282	0.08882	0.38989	0.48279	0.48352	0.33905	0.17659	0.18509	0.05358	0.02	0.02696	0.22653	0.65356	0.66268	0.56488	0.49545	0.57948	0.57489	0.71892	0.79546	0.90681	0.94313	0.93474	0.92431	0.87554	0.88273	0.83552	0.66481	0.807	0.80316	0.7336	0.69764	0.57899	0.43507	0.28538
VVD2	0.08208	0.20502	0.20628	0.30884	0.37633	0.26013	0.22408	0.23621	0.0214	0.10031	0.34037	0.41316	0.24106	0.32268	0.20508	0.04617	0.35089	0.45395	0.45093	0.30101	0.12878	0.13031	0.00734	0.0861	0.03752	0.16015	0.60518	0.61506	0.51334	0.43928	0.52283	0.52362	0.6854	0.7661	0.89155	0.95268	0.94505	0.93795	0.89107	0.89227	0.83896	0.66448	0.84531	0.83994	0.72659	0.69703	0.60232	0.44448	0.26627
VVD2	0.12851	0.24882	0.24454	0.33772	0.39599	0.26967	0.23675	0.24632	0.01552	0.101	0.33665	0.40749	0.24079	0.31883	0.20676	0.03618	0.34547	0.44366	0.44225	0.29056	0.12293	0.13139	0.00319	0.07448	0.02576	0.18013	0.61977	0.63153	0.54608	0.46898	0.54303	0.54282	0.69972	0.78229	0.90721	0.9524	0.95601	0.94961	0.90688	0.91152	0.86656	0.69806	0.83884	0.81565	0.71457	0.67095	0.55933	0.40205	0.23597
VVD2	0.17624	0.29749	0.2943	0.38404	0.44648	0.31947	0.29109	0.30019	0.03661	0.05109	0.28569	0.3568	0.19246	0.26965	0.16169	0.07249	0.37998	0.46902	0.47157	0.32372	0.16449	0.17914	0.04875	0.01536	0.03114	0.23808	0.65834	0.66784	0.59026	0.5177	0.58581	0.58658	0.73452	0.81332	0.92608	0.94644	0.95169	0.94407	0.90263	0.91133	0.87449	0.71371	0.81609	0.79258	0.73386	0.67786	0.54026	0.39428	0.25214
VVD2	0.22163	0.34552	0.34347	0.44133	0.51241	0.3909	0.36325	0.37239	0.1128	0.02238	0.21263	0.28436	0.11795	0.19525	0.08762	0.14214	0.44455	0.52505	0.52931	0.38682	0.23511	0.25259	0.12518	0.0622	0.10911	0.31081	0.70973	0.72	0.64746	0.58381	0.64535	0.64962	0.78512	0.85634	0.94919	0.94354	0.94221	0.93063	0.88283	0.89837	0.86354	0.70012	0.77772	0.76992	0.75916	0.69865	0.54094	0.41313	0.29817
VVD2	0.23978	0.3565	0.34947	0.42743	0.4778	0.34058	0.31518	0.32201	0.05829	0.03569	0.26096	0.3286	0.17463	0.24787	0.14941	0.06989	0.37602	0.4559	0.46138	0.31567	0.1665	0.19077	0.06921	0.01529	0.05874	0.26953	0.67187	0.68271	0.61953	0.54689	0.61094	0.6095	0.74129	0.81995	0.92882	0.92741	0.94324	0.93474	0.89783	0.91203	0.88609	0.73553	0.78559	0.74384	0.71003	0.64142	0.48154	0.34119	0.22042
VVD2	0.24689	0.36491	0.35687	0.44092	0.49472	0.3601	0.33472	0.34128	0.07902	0.01679	0.24325	0.31117	0.154	0.22729	0.12642	0.09457	0.40068	0.47985	0.48388	0.33843	0.18934	0.21274	0.09022	0.03374	0.07864	0.2863	0.6851	0.69844	0.63695	0.56767	0.63054	0.63107	0.76	0.8357	0.93846	0.93093	0.94306	0.93365	0.89182	0.90853	0.8815	0.72428	0.77442	0.73983	0.71399	0.64805	0.48787	0.35199	0.23693
VVD2	0.25582	0.37796	0.37371	0.47388	0.54555	0.42518	0.39897	0.4096	0.15473	0.06075	0.17007	0.24037	0.07543	0.15125	0.04532	0.17843	0.47742	0.55158	0.55546	0.41578	0.27059	0.29102	0.16757	0.10697	0.15336	0.34966	0.72997	0.74353	0.67851	0.6221	0.68099	0.68968	0.81413	0.87776	0.958	0.93226	0.92843	0.91337	0.86154	0.88287	0.85326	0.68799	0.74177	0.73841	0.75378	0.69103	0.52306	0.40662	0.31068
VVD2	0.28557	0.40364	0.39445	0.48253	0.54779	0.4206	0.39806	0.40587	0.15063	0.05266	0.17064	0.23746	0.08018	0.15171	0.0526	0.16193	0.46092	0.53052	0.53596	0.39587	0.2563	0.28186	0.16291	0.11017	0.15559	0.35476	0.7242	0.73833	0.68924	0.6325	0.67673	0.68869	0.81	0.87461	0.95491	0.91818	0.92647	0.91189	0.86624	0.89113	0.86797	0.71181	0.73036	0.71185	0.73481	0.65831	0.47858	0.36348	0.27612
VVD2	0.30537	0.42244	0.41558	0.49693	0.56486	0.44002	0.41811	0.42582	0.17198	0.07644	0.14452	0.21108	0.05616	0.12662	0.02933	0.17799	0.47018	0.53399	0.54227	0.40668	0.27292	0.30072	0.18474	0.13673	0.17949	0.37531	0.72829	0.73918	0.69365	0.64307	0.67908	0.69458	0.81414	0.87728	0.95065	0.9022	0.91213	0.89776	0.8559	0.88088	0.86145	0.71454	0.71468	0.69747	0.74263	0.65918	0.46715	0.35933	0.28228
VVD2	0.30152	0.42249	0.41714	0.51297	0.58805	0.46835	0.43723	0.44948	0.19788	0.10355	0.12353	0.19202	0.02695	0.09939	0.00602	0.22341	0.51401	0.58116	0.58666	0.45202	0.31383	0.33481	0.21236	0.15396	0.20257	0.39155	0.74772	0.76034	0.70485	0.66182	0.69332	0.7157	0.84034	0.89898	0.96317	0.9175	0.91596	0.89984	0.84925	0.87587	0.84438	0.68251	0.70822	0.7162	0.76648	0.69141	0.51063	0.41046	0.33232
VVD2	0.31181	0.43307	0.4294	0.52601	0.60238	0.48395	0.45648	0.46795	0.21584	0.12149	0.10557	0.17462	0.00974	0.08184	0.02178	0.23728	0.52618	0.59098	0.59693	0.46405	0.32877	0.35164	0.23025	0.17452	0.22233	0.41268	0.76347	0.77539	0.72252	0.67706	0.70778	0.72815	0.85235	0.90811	0.96697	0.91442	0.91138	0.8951	0.84307	0.86944	0.84297	0.68349	0.70346	0.71225	0.77593	0.6997	0.51096	0.41379	0.34342
VVD2	0.36774	0.48196	0.47814	0.54776	0.61798	0.49625	0.4851	0.49138	0.24348	0.15062	0.06113	0.12514	0.02159	0.0431	0.04506	0.23279	0.50938	0.55747	0.5703	0.44608	0.33025	0.36572	0.25811	0.22421	0.26239	0.45408	0.76253	0.76931	0.74603	0.699	0.7138	0.72979	0.84305	0.89551	0.94478	0.85895	0.87085	0.85382	0.81751	0.84501	0.84177	0.71262	0.6577	0.64372	0.75452	0.65319	0.42705	0.34116	0.30211
VVD2	0.38969	0.50424	0.50438	0.58203	0.66353	0.55367	0.53916	0.5501	0.31374	0.22479	0.01546	0.04868	0.0998	0.03488	0.12439	0.30673	0.56796	0.608	0.62207	0.50802	0.40054	0.43371	0.3294	0.29421	0.33302	0.51037	0.78983	0.79438	0.77019	0.73851	0.74229	0.76596	0.87082	0.913	0.93905	0.83505	0.83487	0.81387	0.77294	0.80455	0.79728	0.66716	0.60379	0.61787	0.7735	0.67313	0.43973	0.37704	0.36109
VVD2	0.3337	0.45494	0.45771	0.55798	0.64872	0.54817	0.52037	0.53591	0.29835	0.21189	0.01034	0.07895	0.08631	0.01523	0.11997	0.32567	0.59221	0.64573	0.65353	0.53471	0.41174	0.43187	0.31529	0.2617	0.30793	0.47809	0.78528	0.79272	0.74405	0.71791	0.72952	0.76079	0.88068	0.92161	0.94944	0.8725	0.85528	0.83474	0.78058	0.8091	0.78299	0.63033	0.63794	0.68024	0.8038	0.72475	0.52384	0.45639	0.4141
VVD2	0.34413	0.46289	0.46422	0.54969	0.63241	0.52143	0.49917	0.5128	0.26761	0.1804	0.04013	0.10763	0.05199	0.01689	0.08223	0.2829	0.55536	0.60835	0.61825	0.49642	0.37448	0.4001	0.28496	0.23971	0.28306	0.46399	0.77601	0.78125	0.742	0.70561	0.71679	0.74324	0.86942	0.91477	0.95236	0.87443	0.86902	0.85014	0.80562	0.83198	0.81541	0.67467	0.66126	0.68121	0.79809	0.70713	0.49484	0.41728	0.37175
VVD2	0.35995	0.47298	0.47359	0.53704	0.61673	0.50587	0.49507	0.50507	0.26388	0.1806	0.02795	0.09118	0.05451	0.00923	0.07974	0.2608	0.52271	0.56592	0.58046	0.46431	0.35472	0.38747	0.28206	0.25176	0.28657	0.46585	0.74937	0.75033	0.73177	0.69384	0.69551	0.71954	0.84008	0.88561	0.92116	0.82851	0.83506	0.81654	0.78609	0.81061	0.80958	0.69301	0.63699	0.63904	0.77496	0.66843	0.43715	0.36343	0.3312
VVD2	0.35457	0.46823	0.46587	0.52396	0.596	0.47371	0.46463	0.47246	0.22245	0.13508	0.07464	0.13784	0.0052	0.05919	0.02701	0.20967	0.48363	0.5308	0.54564	0.42295	0.30912	0.3457	0.24002	0.21184	0.24534	0.43773	0.74208	0.74341	0.72337	0.6739	0.68519	0.70064	0.82184	0.87566	0.92791	0.84587	0.86183	0.84643	0.81908	0.84173	0.84361	0.72788	0.66885	0.64865	0.75909	0.65118	0.42026	0.33142	0.28778
VVD2	0.35652	0.45737	0.44958	0.47534	0.52182	0.3827	0.38482	0.38354	0.12838	0.03903	0.15582	0.21245	0.08914	0.1464	0.07414	0.09122	0.36836	0.41433	0.43154	0.30484	0.19518	0.24108	0.14392	0.13181	0.15665	0.36151	0.66842	0.66876	0.66827	0.60597	0.61994	0.62563	0.74643	0.81129	0.88869	0.81492	0.8575	0.84753	0.84046	0.85928	0.87642	0.78504	0.6884	0.61674	0.68841	0.56346	0.33019	0.22115	0.16506
VVD2	0.36856	0.46753	0.45405	0.47565	0.51068	0.36129	0.36369	0.36045	0.1011	0.00633	0.18577	0.24102	0.12169	0.17765	0.10922	0.05503	0.33895	0.38671	0.40384	0.27238	0.16129	0.21024	0.11395	0.10397	0.13112	0.34519	0.66312	0.66619	0.66754	0.59506	0.61294	0.6148	0.73448	0.80373	0.89202	0.82213	0.87362	0.86468	0.85847	0.87883	0.89739	0.80482	0.69845	0.60976	0.66297	0.5362	0.30534	0.18835	0.12857
VVD2	0.38211	0.48258	0.47399	0.49596	0.53387	0.38989	0.39291	0.39103	0.13534	0.04437	0.14784	0.20473	0.08631	0.1428	0.07472	0.08411	0.36078	0.40374	0.4234	0.29692	0.19115	0.24136	0.14732	0.13917	0.16492	0.37513	0.68001	0.67975	0.67913	0.61129	0.62838	0.62753	0.74159	0.80852	0.88745	0.80915	0.85529	0.84522	0.83898	0.85749	0.87916	0.79363	0.6802	0.59994	0.67905	0.55145	0.31081	0.20284	0.15504
VVD2	0.3233	0.43665	0.43568	0.48847	0.55431	0.42928	0.4229	0.42717	0.17279	0.08756	0.12378	0.18794	0.04799	0.11372	0.02698	0.15647	0.43581	0.48759	0.50377	0.37663	0.25791	0.2949	0.18857	0.16172	0.19273	0.39243	0.71513	0.71469	0.68846	0.62941	0.65435	0.66033	0.78488	0.84834	0.91824	0.85429	0.87421	0.86068	0.83859	0.85402	0.85726	0.74627	0.70162	0.66726	0.74758	0.64132	0.41911	0.31665	0.25542
VVD2	0.2703	0.39118	0.39051	0.46575	0.53882	0.41706	0.40048	0.40801	0.14849	0.06106	0.1654	0.23423	0.07768	0.1498	0.04951	0.16038	0.45312	0.51966	0.52921	0.39361	0.25656	0.28271	0.16387	0.11809	0.15727	0.3567	0.71819	0.72286	0.67326	0.61423	0.6531	0.66157	0.79721	0.86396	0.94468	0.90863	0.91586	0.90198	0.86598	0.88101	0.86458	0.72435	0.74518	0.72973	0.76683	0.68317	0.4928	0.37852	0.28856
VVD2	0.27815	0.39331	0.38909	0.45043	0.5045	0.36894	0.35497	0.36107	0.0981	0.0078	0.21173	0.27774	0.13169	0.20176	0.10922	0.09408	0.39129	0.45836	0.46909	0.33029	0.19388	0.22546	0.11068	0.07119	0.10746	0.31663	0.68672	0.69192	0.64763	0.57914	0.62519	0.62433	0.75548	0.83005	0.92702	0.89849	0.91957	0.90898	0.88195	0.89497	0.88409	0.75343	0.7561	0.71166	0.72406	0.63591	0.44657	0.31904	0.22192
VVD2	0.24162	0.35873	0.35318	0.41955	0.47225	0.33451	0.31555	0.32379	0.05778	0.03248	0.25599	0.32309	0.17252	0.24441	0.14741	0.06505	0.36791	0.44367	0.4514	0.30812	0.16335	0.19046	0.07009	0.02359	0.06255	0.27468	0.66734	0.67422	0.61676	0.54341	0.5992	0.59784	0.7358	0.81316	0.92177	0.91496	0.93527	0.92674	0.8972	0.90726	0.88927	0.75036	0.78575	0.74	0.71756	0.63873	0.46928	0.33021	0.21239
VVD2	0.22071	0.34415	0.34361	0.42935	0.49624	0.37002	0.34584	0.35566	0.0918	0.00436	0.22883	0.29948	0.13633	0.21222	0.10562	0.1194	0.42033	0.49995	0.50537	0.36361	0.21303	0.23288	0.106	0.04847	0.09146	0.29544	0.69307	0.7002	0.62857	0.56207	0.61966	0.62402	0.76855	0.84095	0.93965	0.93704	0.94097	0.93072	0.89002	0.89948	0.87053	0.71742	0.78875	0.77241	0.75882	0.69207	0.53136	0.39933	0.27894
VVD2	0.16808	0.29354	0.29286	0.39073	0.46676	0.34894	0.31786	0.32988	0.06726	0.01737	0.25782	0.33095	0.15843	0.23811	0.12233	0.11777	0.42151	0.51114	0.51268	0.36735	0.20627	0.21635	0.08206	0.01291	0.06113	0.26097	0.67736	0.68646	0.60262	0.53491	0.5982	0.60764	0.76211	0.8358	0.93891	0.95704	0.9521	0.94217	0.8948	0.90218	0.86148	0.69556	0.81668	0.81432	0.7714	0.7194	0.58201	0.44313	0.302
VVD2	0.14269	0.26523	0.26202	0.35373	0.43209	0.31558	0.2886	0.29696	0.03349	0.05024	0.28875	0.36047	0.18959	0.26751	0.15145	0.08979	0.3947	0.48729	0.48782	0.33964	0.17635	0.18469	0.04902	0.01849	0.02979	0.22993	0.64862	0.65713	0.58058	0.50931	0.5659	0.57918	0.74308	0.81886	0.92836	0.95385	0.95406	0.94603	0.90314	0.90815	0.86865	0.70786	0.83439	0.82467	0.76603	0.7109	0.57799	0.43203	0.2808
VVD2	0.10783	0.22074	0.21197	0.27386	0.33241	0.202	0.17851	0.18449	0.08588	0.16677	0.39672	0.46432	0.30429	0.37691	0.26524	0.02919	0.28068	0.38061	0.37991	0.22498	0.05692	0.06579	0.0697	0.12886	0.08359	0.12511	0.55915	0.56734	0.50209	0.41805	0.468	0.48111	0.66516	0.75108	0.88885	0.93949	0.96077	0.95942	0.93442	0.93082	0.89732	0.75214	0.87986	0.83475	0.71605	0.64973	0.53428	0.36365	0.17956
VVD2	0.20818	0.32683	0.32315	0.39184	0.46205	0.33579	0.31551	0.32474	0.05771	0.02631	0.25738	0.32671	0.16539	0.23784	0.13038	0.09288	0.39372	0.47487	0.48004	0.33604	0.18508	0.20326	0.07442	0.02273	0.06606	0.27035	0.66179	0.66754	0.61214	0.54372	0.58028	0.59575	0.758	0.83111	0.93268	0.92983	0.94251	0.93435	0.90356	0.91117	0.88691	0.74524	0.81133	0.78776	0.76741	0.68698	0.52364	0.38638	0.25668
VVD2	0.12896	0.26073	0.2691	0.38982	0.4991	0.41183	0.37755	0.3933	0.144	0.06924	0.17862	0.25518	0.06853	0.15137	0.02307	0.22623	0.51384	0.60217	0.60125	0.46482	0.30447	0.30189	0.16289	0.08257	0.13352	0.3068	0.69776	0.70656	0.61367	0.56774	0.61655	0.64411	0.80372	0.86347	0.93763	0.94841	0.91706	0.90261	0.84159	0.85125	0.79808	0.62187	0.78384	0.83677	0.83388	0.79386	0.66253	0.54759	0.4163
VVD2	0.01575	0.14773	0.15909	0.29355	0.40902	0.3355	0.29198	0.30906	0.06591	0.000314	0.253	0.33138	0.13523	0.22207	0.08166	0.18706	0.47294	0.57886	0.57052	0.43048	0.25375	0.23463	0.08629	0.01131	0.04368	0.20503	0.62579	0.63565	0.51681	0.47013	0.53288	0.56375	0.74262	0.80579	0.89563	0.95549	0.91127	0.90107	0.83332	0.83215	0.7598	0.56695	0.8205	0.89133	0.81791	0.80762	0.73065	0.60041	0.42489
VVD2	0.02596	0.15769	0.17464	0.30736	0.43287	0.36899	0.33083	0.34732	0.11075	0.05057	0.1998	0.27814	0.0839	0.17013	0.03078	0.22831	0.50239	0.60039	0.59458	0.4623	0.29469	0.27733	0.13345	0.04125	0.09148	0.24361	0.63788	0.64334	0.52792	0.48973	0.54533	0.57677	0.75312	0.81002	0.88533	0.92973	0.88008	0.8684	0.80249	0.80017	0.7345	0.55155	0.79006	0.87316	0.8376	0.82235	0.73059	0.6141	0.45573
VVD2	0.06865	0.19539	0.21865	0.34511	0.48581	0.44513	0.41909	0.43283	0.21797	0.1665	0.06988	0.14505	0.04016	0.0405	0.0894	0.32299	0.56475	0.64223	0.64066	0.52784	0.38545	0.37147	0.24152	0.16186	0.20482	0.33481	0.6583	0.66053	0.56829	0.54719	0.57867	0.61506	0.7773	0.81436	0.85025	0.85066	0.79238	0.77694	0.71064	0.71133	0.66036	0.49939	0.69002	0.79793	0.85214	0.82306	0.7001	0.62149	0.51219
VVD2	0.21199	0.33321	0.34669	0.42319	0.53456	0.45371	0.44387	0.4525	0.21586	0.15115	0.07018	0.13934	0.02149	0.0496	0.0565	0.2582	0.51187	0.57116	0.58053	0.46432	0.34047	0.3553	0.23886	0.19307	0.22646	0.39037	0.69463	0.69112	0.63913	0.60246	0.61857	0.64494	0.79439	0.8384	0.88136	0.83747	0.82061	0.80712	0.76815	0.77594	0.76085	0.64128	0.69293	0.73103	0.82888	0.74753	0.55661	0.47286	0.39721
VVD2	0.31653	0.43032	0.42629	0.47063	0.53613	0.40639	0.39687	0.40447	0.14373	0.05862	0.15544	0.21997	0.07469	0.13924	0.04833	0.14225	0.4235	0.48155	0.49451	0.36402	0.23947	0.27309	0.15989	0.13081	0.16599	0.36908	0.70092	0.70252	0.67809	0.61791	0.63001	0.6451	0.7872	0.84884	0.92274	0.86759	0.89098	0.88127	0.86044	0.87372	0.87356	0.76155	0.73111	0.6972	0.76432	0.65229	0.43817	0.32951	0.25291
VVD2	0.25566	0.3749	0.37292	0.43639	0.50234	0.37072	0.34639	0.35952	0.0921	0.00738	0.2215	0.29086	0.13147	0.20388	0.10011	0.11764	0.41304	0.48866	0.49629	0.35685	0.21209	0.23475	0.109	0.06052	0.1024	0.30745	0.68715	0.69069	0.63189	0.56918	0.60396	0.61869	0.77145	0.84266	0.93583	0.92111	0.9336	0.92527	0.89485	0.90442	0.88417	0.74741	0.79163	0.77035	0.77719	0.69099	0.51378	0.38598	0.27094
VVD2	0.13903	0.26532	0.26728	0.3625	0.43454	0.31541	0.27077	0.28968	0.02452	0.05536	0.30044	0.37487	0.19566	0.27733	0.15308	0.09965	0.40364	0.50303	0.50013	0.35188	0.18105	0.1831	0.04174	0.03666	0.01396	0.20837	0.64057	0.65019	0.54716	0.48675	0.55052	0.56908	0.73695	0.81366	0.92623	0.96878	0.95923	0.95147	0.90272	0.90519	0.85431	0.68008	0.84702	0.85605	0.77784	0.73508	0.62385	0.47696	0.30885
VVD2	0.27886	0.39448	0.3894	0.44381	0.50051	0.36165	0.34182	0.35361	0.0855	0.000118	0.22356	0.29068	0.13875	0.20798	0.10889	0.09902	0.39505	0.46557	0.47498	0.33551	0.19617	0.2247	0.10246	0.06412	0.10477	0.31848	0.69205	0.69358	0.64916	0.57874	0.60647	0.61492	0.77082	0.84137	0.93596	0.91046	0.93178	0.9217	0.89958	0.90827	0.89828	0.77016	0.78319	0.74661	0.76146	0.66307	0.47297	0.34424	0.23854
VVD2	0.1071	0.19912	0.18145	0.18656	0.20077	0.04221	0.02425	0.02672	0.24522	0.32116	0.52411	0.5811	0.45206	0.51363	0.42059	0.21108	0.09376	0.19349	0.19541	0.03772	0.12308	0.10434	0.22823	0.26386	0.22893	0.00661	0.42558	0.42792	0.38355	0.28398	0.32767	0.33032	0.52751	0.62419	0.7978	0.87189	0.93085	0.93836	0.94651	0.93158	0.9193	0.81409	0.89989	0.78776	0.6039	0.51314	0.40909	0.21063	0.000429
VVD2	0.06315	0.18571	0.18654	0.28613	0.35588	0.23923	0.19153	0.21143	0.0508	0.12517	0.37016	0.44451	0.26457	0.34778	0.21942	0.04237	0.34848	0.45924	0.45278	0.29997	0.11938	0.11305	0.03297	0.11815	0.06512	0.12886	0.58473	0.59415	0.4809	0.41184	0.48547	0.49927	0.68124	0.76225	0.8915	0.96857	0.95758	0.95293	0.9056	0.90068	0.84088	0.66107	0.87529	0.88243	0.74817	0.72022	0.64373	0.48054	0.28172
VVD2	0.10613	0.03598	0.07356	0.28933	0.44868	0.44037	0.36771	0.40383	0.21773	0.1778	0.07876	0.16365	0.05368	0.04597	0.11306	0.39876	0.63043	0.737	0.72018	0.61001	0.43752	0.38863	0.24025	0.10206	0.16292	0.26198	0.64829	0.65677	0.45892	0.45186	0.55316	0.58219	0.72858	0.76255	0.80057	0.88512	0.76332	0.74274	0.62888	0.62681	0.51299	0.27558	0.67667	0.87324	0.83397	0.90849	0.89898	0.81971	0.66237
VVD2	0.01703	0.12577	0.15347	0.34853	0.48993	0.45232	0.38376	0.41725	0.20726	0.15267	0.1083	0.19334	0.02143	0.07564	0.07869	0.36267	0.61843	0.72228	0.70898	0.58842	0.41363	0.37746	0.22726	0.10036	0.16349	0.29005	0.69234	0.70262	0.5277	0.50948	0.59876	0.62804	0.77865	0.82208	0.87162	0.9344	0.83703	0.81675	0.71302	0.71705	0.61557	0.38429	0.72107	0.88014	0.84904	0.8926	0.84881	0.75759	0.60603
VVD2	0.09803	0.03544	0.0566	0.219	0.3439	0.29359	0.23082	0.25537	0.03184	0.01997	0.27653	0.35744	0.15042	0.24374	0.08985	0.19832	0.46789	0.58815	0.57169	0.43707	0.24803	0.20844	0.05326	0.06896	0.00967	0.1265	0.5645	0.5746	0.40851	0.37496	0.46377	0.49543	0.67743	0.73699	0.83047	0.93978	0.86696	0.85706	0.7734	0.76437	0.66653	0.45096	0.81513	0.9298	0.80216	0.83677	0.82355	0.69148	0.48177
VVD2	0.22208	0.09252	0.06211	0.12232	0.27179	0.26349	0.19637	0.22195	0.03301	0.000544	0.24786	0.32792	0.11783	0.2122	0.05106	0.23935	0.47437	0.59902	0.57604	0.4564	0.2689	0.20919	0.05578	0.0818	0.02247	0.0722	0.48421	0.49384	0.30426	0.28949	0.38345	0.42506	0.60556	0.65205	0.73004	0.86798	0.76549	0.75523	0.65942	0.64285	0.52737	0.30359	0.75409	0.92199	0.77816	0.84801	0.88676	0.77155	0.54969
VVD2	0.21985	0.09685	0.07562	0.08092	0.21362	0.18597	0.12612	0.14609	0.05768	0.09459	0.3378	0.41298	0.21176	0.29902	0.1431	0.14162	0.39059	0.5188	0.49608	0.36593	0.17492	0.12129	0.0323	0.15777	0.10121	0.00969	0.4358	0.44656	0.28292	0.25288	0.33121	0.37467	0.57571	0.63133	0.73295	0.87787	0.80217	0.79658	0.71748	0.69784	0.59271	0.38372	0.80618	0.93079	0.74852	0.79693	0.8315	0.69326	0.4516
VVD2	0.12171	0.00633	0.02282	0.18009	0.31052	0.2668	0.21185	0.23174	0.0162	0.03355	0.28085	0.35717	0.1549	0.24052	0.08825	0.19164	0.45309	0.57099	0.55296	0.41997	0.23521	0.19376	0.04088	0.07536	0.01674	0.11187	0.53163	0.54383	0.40023	0.36528	0.4309	0.47288	0.66407	0.71854	0.80814	0.91306	0.84501	0.83558	0.75541	0.7463	0.65158	0.44281	0.79818	0.91337	0.78775	0.81303	0.80181	0.67356	0.46576
VVD2	0.1764	0.05161	0.03601	0.13168	0.26167	0.22613	0.16597	0.18661	0.01817	0.06376	0.308	0.38333	0.18001	0.26541	0.11149	0.17396	0.42873	0.55312	0.53063	0.39925	0.20998	0.15992	0.00573	0.11928	0.05705	0.06332	0.49032	0.50568	0.35096	0.31554	0.38632	0.42832	0.62357	0.67808	0.77143	0.89712	0.82204	0.81322	0.72789	0.71618	0.60998	0.39083	0.78726	0.91262	0.75145	0.79559	0.81701	0.68528	0.46284
VVD2	0.12127	0.01084	0.02816	0.20251	0.33131	0.28763	0.22392	0.24697	0.03338	0.01824	0.27124	0.35048	0.14278	0.23307	0.07839	0.21029	0.4743	0.59576	0.57636	0.44338	0.25424	0.21002	0.05468	0.07238	0.00799	0.12304	0.55776	0.5714	0.40879	0.37307	0.45529	0.48993	0.67197	0.72853	0.81664	0.92841	0.85104	0.84048	0.75028	0.74283	0.63644	0.4115	0.78972	0.91485	0.78059	0.82382	0.82539	0.6981	0.49067
VVD2	0.07931	0.05141	0.06372	0.23403	0.35227	0.29745	0.23412	0.25719	0.03852	0.01982	0.27134	0.34947	0.14347	0.23186	0.08091	0.20477	0.47528	0.59467	0.57545	0.43963	0.25224	0.21286	0.0581	0.06556	0.000943	0.14031	0.57638	0.59301	0.44163	0.40236	0.4801	0.51367	0.69081	0.74846	0.83542	0.93589	0.86611	0.85545	0.76694	0.76446	0.66175	0.43765	0.7864	0.89946	0.77207	0.80589	0.79614	0.66933	0.47089
VVD2	0.03791	0.09553	0.10624	0.27706	0.39545	0.33615	0.27471	0.29857	0.0764	0.01275	0.23958	0.31761	0.11134	0.19892	0.0491	0.23264	0.50635	0.62004	0.60254	0.46703	0.28354	0.24912	0.0956	0.02458	0.04177	0.18456	0.61319	0.63121	0.48592	0.44929	0.52256	0.55687	0.72715	0.78337	0.86347	0.94592	0.87825	0.86515	0.77513	0.77679	0.67898	0.45428	0.77551	0.88723	0.78752	0.81299	0.78454	0.66482	0.48154
VVD2	0.02231	0.15866	0.16877	0.32838	0.43978	0.36614	0.30964	0.33277	0.0971	0.02664	0.22865	0.30791	0.10508	0.193	0.04895	0.22749	0.51235	0.62043	0.6078	0.46918	0.28947	0.26613	0.11499	0.00465	0.0677	0.22638	0.65672	0.67213	0.53633	0.49437	0.56695	0.59435	0.75949	0.82061	0.9033	0.96707	0.91014	0.89667	0.81348	0.81772	0.73199	0.51764	0.79284	0.88298	0.80701	0.81535	0.75472	0.63227	0.46239
VVD2	0.00346	0.12881	0.13591	0.28963	0.39291	0.31389	0.25433	0.27762	0.04112	0.02832	0.28183	0.3605	0.16038	0.24869	0.10536	0.17401	0.46293	0.57722	0.56352	0.42094	0.23596	0.21065	0.05852	0.05316	0.01114	0.17413	0.62021	0.6356	0.4969	0.44733	0.52646	0.55132	0.72211	0.78803	0.88519	0.96729	0.91636	0.90572	0.82689	0.82828	0.74007	0.52673	0.81665	0.89341	0.7806	0.7921	0.74736	0.61163	0.42369
VVD2	0.02093	0.1107	0.11733	0.28056	0.38405	0.3103	0.24545	0.27098	0.04185	0.02711	0.27952	0.35773	0.15521	0.24389	0.09782	0.18501	0.4695	0.58624	0.56968	0.42857	0.24168	0.21143	0.05816	0.06025	0.00741	0.16272	0.60931	0.62787	0.482	0.43623	0.51851	0.54595	0.71272	0.77699	0.87156	0.96053	0.90292	0.89177	0.80609	0.80889	0.71328	0.4901	0.80152	0.88991	0.76715	0.78964	0.76096	0.62838	0.43742
VVD2	0.03323	0.16731	0.17414	0.33649	0.44151	0.36258	0.30256	0.32787	0.09402	0.02047	0.2341	0.31328	0.11159	0.20084	0.05831	0.21865	0.50709	0.61615	0.60377	0.46344	0.28261	0.26017	0.10981	0.00251	0.06292	0.22443	0.66129	0.6788	0.54059	0.49535	0.5764	0.60064	0.75673	0.8197	0.90507	0.97032	0.91517	0.90178	0.81647	0.82417	0.73597	0.51722	0.79016	0.87387	0.79008	0.802	0.74474	0.62025	0.45106
VVD2	0.0345	0.1715	0.18288	0.35573	0.46872	0.39835	0.33832	0.36493	0.13612	0.06438	0.19225	0.27342	0.06941	0.16133	0.01826	0.25921	0.54213	0.64847	0.63698	0.50077	0.32302	0.29997	0.15144	0.03655	0.10088	0.25762	0.68718	0.70358	0.55742	0.51514	0.60338	0.62394	0.77055	0.82963	0.90522	0.96499	0.90043	0.88526	0.79336	0.8023	0.71308	0.49131	0.7719	0.86922	0.80477	0.82502	0.76426	0.64845	0.48975
VVD2	0.06248	0.19752	0.20549	0.37339	0.47864	0.40095	0.34266	0.36813	0.13836	0.06281	0.18968	0.26955	0.06951	0.15879	0.01979	0.2522	0.53655	0.63972	0.62862	0.4922	0.31781	0.29861	0.15222	0.04178	0.10762	0.27063	0.69677	0.71425	0.57795	0.53199	0.61463	0.63372	0.77606	0.83514	0.90933	0.95944	0.90099	0.88593	0.7958	0.80778	0.72297	0.50297	0.75976	0.84769	0.78921	0.80235	0.73424	0.61928	0.46964
VVD2	0.06137	0.195	0.20081	0.36747	0.46888	0.38785	0.32748	0.35243	0.12196	0.04457	0.20704	0.28575	0.0866	0.17513	0.03653	0.23601	0.52318	0.62809	0.61597	0.4778	0.30153	0.28188	0.13501	0.02322	0.08994	0.25379	0.68461	0.70396	0.5679	0.52168	0.60586	0.62643	0.76761	0.82959	0.90816	0.96197	0.90668	0.89208	0.80231	0.81532	0.72835	0.50612	0.7641	0.84717	0.77608	0.78994	0.72697	0.60847	0.45397
VVD2	0.03094	0.16861	0.18137	0.3669	0.48283	0.41826	0.354	0.38142	0.16124	0.08911	0.16618	0.2472	0.04249	0.13452	0.00889	0.28544	0.56331	0.66823	0.65506	0.522	0.34641	0.32147	0.17465	0.05415	0.1196	0.26986	0.69528	0.7144	0.56084	0.52383	0.61983	0.63689	0.76886	0.82587	0.89529	0.95414	0.88224	0.86551	0.76523	0.77773	0.68297	0.45244	0.74322	0.85122	0.78994	0.82212	0.76896	0.66015	0.50861
VVD2	0.04819	0.18635	0.19998	0.38671	0.50137	0.43705	0.37587	0.40287	0.18541	0.11284	0.13992	0.22119	0.01864	0.11005	0.03042	0.30066	0.57468	0.67471	0.66348	0.53372	0.36354	0.34169	0.19784	0.08071	0.14605	0.29819	0.71475	0.73303	0.58359	0.54381	0.64143	0.6525	0.77717	0.83176	0.89394	0.942	0.86975	0.8521	0.75091	0.76663	0.67569	0.44753	0.72299	0.82969	0.78484	0.81568	0.75448	0.65101	0.51252
VVD2	0.08865	0.2241	0.23358	0.41585	0.52342	0.45139	0.39371	0.41879	0.19964	0.12212	0.12568	0.20489	0.00717	0.09582	0.03891	0.3013	0.57649	0.6712	0.66196	0.53316	0.36849	0.35167	0.21082	0.09974	0.16641	0.32461	0.7325	0.7515	0.61541	0.57195	0.66215	0.67272	0.79004	0.84539	0.90215	0.93431	0.8697	0.85203	0.75405	0.77441	0.68802	0.4626	0.7019	0.79861	0.76982	0.78961	0.71485	0.61545	0.4933
VVD2	0.05986	0.19276	0.19863	0.37258	0.46931	0.3881	0.32591	0.35093	0.1263	0.04788	0.20063	0.27847	0.08213	0.17136	0.03608	0.23407	0.51942	0.62311	0.61132	0.47453	0.30058	0.28129	0.13761	0.02333	0.08965	0.25158	0.68325	0.70433	0.56268	0.51638	0.6134	0.6251	0.75286	0.81646	0.89503	0.9509	0.89378	0.87878	0.7856	0.80159	0.71093	0.4851	0.74423	0.82498	0.7486	0.77062	0.71387	0.59603	0.44583
VVD2	0.08688	0.22125	0.22694	0.40158	0.50082	0.41934	0.35422	0.38186	0.15657	0.07706	0.17245	0.25079	0.05214	0.14119	0.00494	0.26586	0.54955	0.65039	0.63889	0.50357	0.3315	0.31286	0.16875	0.05494	0.12304	0.28338	0.70664	0.7277	0.58772	0.54721	0.6355	0.65336	0.78071	0.83996	0.90959	0.95393	0.89499	0.8786	0.78361	0.80209	0.71134	0.48268	0.7293	0.81888	0.7648	0.782	0.71574	0.60633	0.46712
VVD2	0.08541	0.21597	0.21592	0.37859	0.46971	0.37914	0.31611	0.34184	0.11068	0.02828	0.21879	0.2951	0.09966	0.18605	0.05158	0.21841	0.5093	0.61299	0.6007	0.46038	0.28528	0.26819	0.12301	0.01291	0.08119	0.24809	0.68002	0.70281	0.57345	0.52582	0.60841	0.62886	0.76608	0.82994	0.91167	0.96104	0.91321	0.89865	0.80991	0.82725	0.73998	0.51453	0.75291	0.82521	0.74803	0.7567	0.69353	0.57321	0.42213
VVD2	0.04197	0.17539	0.18073	0.3582	0.46596	0.39389	0.32967	0.35487	0.13325	0.05733	0.19231	0.27015	0.06775	0.15529	0.01394	0.26147	0.54171	0.64723	0.63251	0.49745	0.32093	0.29525	0.1474	0.02848	0.09813	0.25036	0.67532	0.69821	0.55832	0.51764	0.60141	0.62752	0.76671	0.8244	0.89511	0.95147	0.88823	0.87262	0.77469	0.79085	0.69531	0.46295	0.73926	0.83835	0.76481	0.78801	0.74004	0.62809	0.47484
VVD2	0.02565	0.1579	0.16437	0.34525	0.45844	0.3936	0.32854	0.3543	0.13767	0.06415	0.18474	0.26252	0.05879	0.14581	0.002	0.27508	0.55062	0.65676	0.6407	0.50732	0.3304	0.3014	0.1527	0.03189	0.10253	0.2466	0.66461	0.68766	0.54678	0.51196	0.59195	0.62563	0.76633	0.82031	0.8867	0.94395	0.87613	0.85965	0.76086	0.77768	0.6798	0.44638	0.73296	0.84232	0.76871	0.79503	0.7531	0.64522	0.49079
VVD2	0.03178	0.10031	0.11146	0.29629	0.42094	0.36917	0.3022	0.32934	0.11774	0.05312	0.19879	0.27755	0.06887	0.15803	0.00741	0.27609	0.5449	0.65643	0.63829	0.50708	0.3255	0.28778	0.13496	0.00828	0.07834	0.21116	0.63099	0.65167	0.49999	0.47108	0.5506	0.58865	0.74427	0.79546	0.86376	0.9388	0.86147	0.84574	0.74675	0.7562	0.6511	0.41577	0.74359	0.87098	0.78355	0.81912	0.795	0.68563	0.51465
VVD2	0.02399	0.10931	0.12492	0.31876	0.45584	0.41993	0.35474	0.38167	0.1814	0.12042	0.12942	0.20831	0.00201	0.0871	0.0636	0.34208	0.59729	0.70177	0.68409	0.56165	0.38812	0.34876	0.19972	0.0729	0.14191	0.26132	0.65372	0.67345	0.52627	0.50645	0.57796	0.6205	0.76753	0.80964	0.85649	0.91446	0.82611	0.80748	0.70258	0.71449	0.60974	0.3762	0.6998	0.85019	0.80336	0.84122	0.8081	0.71853	0.56824
VVD2	0.047	0.18169	0.19572	0.37021	0.50173	0.45075	0.39476	0.41952	0.20378	0.13766	0.11354	0.19266	0.01233	0.07522	0.06903	0.33753	0.60222	0.69846	0.68681	0.56216	0.39509	0.36856	0.22223	0.11044	0.17583	0.31304	0.69882	0.71474	0.58686	0.5605	0.61907	0.65873	0.80804	0.85289	0.89907	0.93047	0.85679	0.83763	0.74513	0.7575	0.66982	0.45224	0.71494	0.84256	0.83161	0.84184	0.76794	0.67807	0.54522
VVD2	0.02495	0.15927	0.17641	0.34665	0.48607	0.44214	0.3877	0.41225	0.19823	0.13742	0.11274	0.19146	0.01356	0.07328	0.07279	0.33972	0.59734	0.69329	0.68215	0.56003	0.39426	0.36547	0.21919	0.10854	0.17064	0.30086	0.6777	0.69094	0.56158	0.54087	0.59419	0.63814	0.79525	0.83759	0.88193	0.91667	0.84079	0.82257	0.73269	0.74164	0.65496	0.44408	0.71579	0.84932	0.84038	0.84889	0.77723	0.68896	0.55233
VVD2	0.07233	0.20804	0.22298	0.37863	0.51387	0.4582	0.41389	0.4348	0.20843	0.14227	0.10838	0.18695	0.01294	0.07297	0.068	0.32632	0.59377	0.68349	0.67701	0.55153	0.39035	0.37205	0.22928	0.13067	0.18825	0.33159	0.70515	0.71643	0.60254	0.57615	0.62448	0.66348	0.81941	0.86419	0.91204	0.9279	0.8649	0.84642	0.76529	0.77533	0.70331	0.50462	0.72807	0.839	0.85111	0.84062	0.73891	0.64775	0.52276
VVD2	0.11309	0.24586	0.26295	0.40334	0.54002	0.4861	0.45156	0.46987	0.2452	0.1817	0.06161	0.13821	0.05299	0.02931	0.10307	0.34397	0.60239	0.68042	0.67906	0.56009	0.41233	0.40204	0.26764	0.18307	0.23402	0.37542	0.71705	0.72325	0.62645	0.60291	0.63797	0.67889	0.83066	0.86904	0.9045	0.89497	0.8381	0.81878	0.74599	0.75653	0.69942	0.52119	0.69838	0.80289	0.85931	0.83176	0.70049	0.62099	0.5198
VVD2	0.20486	0.33254	0.34639	0.46313	0.5888	0.52263	0.49999	0.51413	0.28657	0.21763	0.01321	0.08562	0.09007	0.01448	0.13112	0.34692	0.60113	0.66273	0.66833	0.55382	0.42429	0.42988	0.30797	0.24442	0.28885	0.43885	0.74589	0.74908	0.68156	0.65754	0.67409	0.71155	0.85067	0.88647	0.91187	0.8622	0.82346	0.80351	0.74258	0.7593	0.72465	0.57027	0.65774	0.73516	0.84396	0.7878	0.61166	0.54384	0.47917
VVD2	0.29062	0.4086	0.41743	0.4995	0.60705	0.5237	0.5172	0.52649	0.29558	0.22207	0.00834	0.05805	0.09581	0.02859	0.1266	0.31097	0.56093	0.6055	0.61929	0.50959	0.39924	0.42308	0.31555	0.27845	0.31331	0.47592	0.75011	0.74882	0.71457	0.68373	0.68458	0.71179	0.84029	0.87669	0.90147	0.81737	0.80426	0.78581	0.74528	0.76397	0.75605	0.63374	0.62397	0.65941	0.80792	0.7182	0.49806	0.43419	0.39988
VVD2	0.23958	0.35511	0.37068	0.46024	0.58961	0.53613	0.53065	0.54065	0.3329	0.27273	0.06784	0.00329	0.15562	0.08976	0.19021	0.36478	0.5872	0.62548	0.63905	0.54441	0.44363	0.45869	0.35565	0.31786	0.34929	0.48412	0.71851	0.71344	0.67647	0.66167	0.64994	0.68533	0.81655	0.83873	0.84208	0.75599	0.72709	0.70743	0.66429	0.67907	0.66835	0.55539	0.56588	0.63389	0.80886	0.72897	0.51996	0.4776	0.45429
VVD2	0.18035	0.3007	0.31566	0.42165	0.55677	0.5064	0.49003	0.50362	0.28946	0.23054	0.0108	0.0585	0.10946	0.03738	0.15092	0.35185	0.58681	0.64146	0.64897	0.54512	0.42529	0.42922	0.31331	0.2583	0.29662	0.43301	0.70688	0.70513	0.64613	0.62674	0.63053	0.67213	0.81715	0.84546	0.85994	0.80541	0.76637	0.7482	0.69583	0.70742	0.67977	0.5465	0.62616	0.70826	0.83628	0.77405	0.59559	0.53788	0.48089
VVD2	0.10469	0.22997	0.25409	0.39607	0.55295	0.53243	0.50169	0.52086	0.32995	0.28136	0.05862	0.01317	0.16834	0.09143	0.21752	0.43462	0.64972	0.71055	0.71117	0.616	0.49174	0.47712	0.35641	0.27839	0.32268	0.42746	0.69426	0.69469	0.60384	0.60425	0.61745	0.67048	0.81067	0.82717	0.82214	0.78654	0.71425	0.69315	0.61852	0.6305	0.57843	0.41985	0.58083	0.72043	0.84149	0.81812	0.68325	0.64198	0.57971
VVD2	0.05712	0.18955	0.21352	0.377	0.53458	0.51128	0.46828	0.4915	0.29508	0.24361	0.00681	0.06913	0.12672	0.044	0.18202	0.424	0.65359	0.72952	0.72422	0.62008	0.47743	0.45314	0.32007	0.22347	0.2765	0.38551	0.69589	0.70233	0.59016	0.5861	0.61583	0.6673	0.81325	0.83804	0.84702	0.84096	0.75883	0.73728	0.6511	0.66292	0.59108	0.4046	0.62619	0.77895	0.85225	0.84979	0.74606	0.69073	0.59933
VVD2	0.086	0.21783	0.23647	0.4004	0.5495	0.51606	0.47123	0.49365	0.29277	0.23359	0.00409	0.07967	0.11642	0.03487	0.17157	0.41527	0.65348	0.73034	0.72457	0.6159	0.47097	0.44931	0.31534	0.21815	0.27462	0.39171	0.71174	0.72178	0.61488	0.6084	0.63819	0.68754	0.82926	0.85698	0.86991	0.8598	0.78318	0.76153	0.67374	0.69012	0.61767	0.42507	0.63265	0.77628	0.84443	0.83756	0.72994	0.67146	0.58176
VVD2	0.08481	0.21773	0.23397	0.40972	0.55092	0.51196	0.45807	0.48478	0.28298	0.21949	0.02263	0.09972	0.1014	0.01745	0.15785	0.41178	0.65733	0.74064	0.73117	0.61825	0.4661	0.44159	0.30324	0.1972	0.25977	0.38108	0.72198	0.73681	0.62009	0.60919	0.65022	0.69699	0.83457	0.86555	0.88402	0.88483	0.80456	0.78219	0.68643	0.70448	0.6232	0.41476	0.6441	0.79039	0.8386	0.84271	0.74893	0.68551	0.58754
VVD2	0.10962	0.24264	0.25119	0.41202	0.534	0.46908	0.41872	0.44101	0.21751	0.14336	0.10359	0.18073	0.0173	0.06674	0.07087	0.3288	0.60125	0.69051	0.68198	0.55482	0.39365	0.37756	0.23578	0.13518	0.19797	0.34522	0.72201	0.73828	0.62907	0.60051	0.64924	0.68644	0.83054	0.87672	0.92353	0.93235	0.87306	0.85405	0.76796	0.78522	0.71001	0.50188	0.70919	0.81471	0.82486	0.81632	0.71529	0.62652	0.51007
VVD2	0.00857	0.14032	0.14973	0.32709	0.44856	0.39372	0.33023	0.3542	0.13976	0.0711	0.17843	0.25599	0.05054	0.13796	0.00861	0.28569	0.55715	0.66364	0.64698	0.51533	0.33849	0.30655	0.15753	0.03724	0.10494	0.23974	0.64734	0.66826	0.53133	0.50432	0.57452	0.61392	0.76518	0.81599	0.87912	0.9366	0.8653	0.84957	0.75214	0.76558	0.66778	0.43857	0.73447	0.85446	0.7882	0.81198	0.76982	0.66606	0.50763
VVD2	0.05854	0.19426	0.20328	0.37709	0.492	0.42371	0.36152	0.38694	0.16264	0.08817	0.16469	0.24354	0.0392	0.12785	0.01578	0.29063	0.57021	0.67278	0.65957	0.52523	0.35093	0.327	0.17912	0.0637	0.12999	0.27779	0.69063	0.7109	0.57598	0.54394	0.61981	0.65224	0.7954	0.84965	0.91325	0.95698	0.89152	0.87414	0.77958	0.79487	0.70386	0.47753	0.74044	0.84693	0.80039	0.81568	0.75081	0.64584	0.50011
VVD2	0.14596	0.27979	0.28327	0.44591	0.54666	0.46005	0.40283	0.42756	0.19592	0.11184	0.13621	0.21318	0.01708	0.10223	0.03134	0.2928	0.57756	0.6695	0.66141	0.52713	0.36241	0.35178	0.21014	0.10741	0.17299	0.33733	0.7404	0.76085	0.64498	0.60607	0.67437	0.69969	0.82941	0.88495	0.94446	0.95798	0.90699	0.88779	0.79917	0.82244	0.74503	0.527	0.72071	0.80248	0.7896	0.78451	0.68538	0.5845	0.46645
VVD2	0.13744	0.2695	0.27123	0.42575	0.51839	0.42387	0.37031	0.39265	0.15468	0.06904	0.17867	0.25509	0.06267	0.14715	0.01674	0.24385	0.53662	0.63138	0.62387	0.48465	0.3173	0.30938	0.16786	0.06812	0.1322	0.30596	0.72319	0.74351	0.62926	0.58131	0.6549	0.67437	0.8077	0.86877	0.9427	0.96576	0.92351	0.90625	0.8225	0.84351	0.76932	0.55424	0.74644	0.80972	0.77263	0.76476	0.66874	0.55551	0.42552
VVD2	0.11966	0.24598	0.24151	0.37909	0.45143	0.34077	0.28687	0.30692	0.06151	0.02699	0.2704	0.34412	0.15867	0.24068	0.11403	0.14677	0.45043	0.55232	0.54312	0.39566	0.22161	0.21536	0.07309	0.02427	0.03913	0.22353	0.66446	0.68634	0.57398	0.51512	0.59465	0.61096	0.75223	0.82505	0.92504	0.97079	0.94513	0.93229	0.85842	0.8757	0.80279	0.59336	0.78736	0.81847	0.72591	0.71505	0.63429	0.49748	0.34056
VVD2	0.12303	0.24682	0.24133	0.3713	0.43512	0.31846	0.26849	0.28641	0.03875	0.05092	0.29078	0.36318	0.18324	0.26346	0.14125	0.11394	0.41974	0.5208	0.5127	0.36435	0.19174	0.18915	0.04931	0.04331	0.01739	0.20773	0.65187	0.67325	0.56465	0.49987	0.58293	0.59225	0.73098	0.80856	0.91617	0.964	0.94562	0.93478	0.86576	0.88229	0.81409	0.61091	0.7941	0.80875	0.70577	0.69126	0.60855	0.46506	0.30578
VVD2	0.12125	0.24726	0.24392	0.38416	0.45238	0.34125	0.2891	0.30854	0.06605	0.02326	0.26411	0.33748	0.15509	0.23685	0.11332	0.14257	0.44427	0.54413	0.53577	0.39038	0.21939	0.21508	0.07556	0.02181	0.03941	0.22451	0.66455	0.68654	0.56919	0.50959	0.59979	0.60665	0.73612	0.8113	0.91241	0.9586	0.93249	0.91992	0.8448	0.86299	0.7903	0.5802	0.77039	0.7969	0.70312	0.69823	0.61881	0.48222	0.3303
VVD2	0.10845	0.23526	0.23493	0.39178	0.46817	0.37001	0.3156	0.33762	0.11071	0.02514	0.21237	0.28618	0.10381	0.18639	0.06541	0.18852	0.47737	0.57282	0.56459	0.42644	0.26191	0.25476	0.11925	0.01838	0.08015	0.25473	0.67923	0.70101	0.57464	0.51932	0.6167	0.6194	0.73669	0.80556	0.89163	0.93268	0.89385	0.87897	0.79502	0.81715	0.73852	0.52494	0.72438	0.77054	0.6988	0.70517	0.62938	0.50753	0.37118
VVD2	0.07162	0.20843	0.22889	0.44795	0.56837	0.52717	0.46129	0.4937	0.31278	0.24346	0.0052	0.07348	0.12277	0.03182	0.15977	0.41487	0.65651	0.73945	0.72999	0.61996	0.4728	0.45028	0.32173	0.19942	0.26222	0.3853	0.74894	0.76924	0.60469	0.58596	0.70024	0.70458	0.78145	0.82128	0.84488	0.86523	0.76785	0.74121	0.62075	0.65196	0.55254	0.31787	0.57608	0.72085	0.74498	0.79918	0.73414	0.67212	0.58639
VVD2	0.06777	0.19632	0.23128	0.4905	0.64017	0.65682	0.59249	0.63027	0.52194	0.47211	0.26744	0.19522	0.37676	0.29159	0.4026	0.61654	0.77999	0.83085	0.8244	0.76027	0.65684	0.62873	0.52873	0.40504	0.46188	0.52294	0.76604	0.78337	0.61439	0.63062	0.7416	0.74207	0.75232	0.75838	0.70464	0.67984	0.53837	0.5017	0.35889	0.40346	0.2976	0.07314	0.31727	0.53999	0.69116	0.77823	0.71187	0.72765	0.73007
VVD2	0.07316	0.19654	0.22329	0.45712	0.58373	0.57575	0.51692	0.54873	0.42076	0.36357	0.15823	0.08689	0.26126	0.17766	0.2831	0.49829	0.68687	0.7453	0.73948	0.66047	0.54862	0.52779	0.42642	0.31172	0.36842	0.4586	0.73823	0.75584	0.60457	0.59421	0.71008	0.69971	0.72272	0.74476	0.72266	0.7117	0.59626	0.56563	0.43943	0.47805	0.38305	0.17158	0.39828	0.56832	0.66525	0.73564	0.66685	0.64976	0.62541
VVD2	0.00873	0.124	0.12794	0.30886	0.3965	0.33699	0.283	0.30228	0.12653	0.05632	0.15422	0.22167	0.05446	0.13333	0.02645	0.20455	0.45155	0.53973	0.52945	0.41248	0.26699	0.25023	0.13361	0.02782	0.08625	0.22708	0.60531	0.62704	0.49836	0.44287	0.557	0.54501	0.62517	0.68284	0.74545	0.79962	0.74073	0.72648	0.63379	0.65748	0.56906	0.36646	0.60079	0.67056	0.59808	0.64068	0.60386	0.50426	0.38612
VVD2	0.06737	0.1821	0.17725	0.30606	0.35902	0.2506	0.20274	0.21715	0.01194	0.09433	0.31987	0.38865	0.22204	0.29911	0.1884	0.0545	0.34735	0.44894	0.44027	0.29649	0.13112	0.12646	0.00354	0.09414	0.03737	0.14852	0.58689	0.60785	0.49834	0.42157	0.52357	0.51425	0.64137	0.72241	0.83709	0.90334	0.88668	0.87853	0.81262	0.82592	0.7593	0.56822	0.76656	0.76705	0.63069	0.63022	0.57125	0.42264	0.25604
VVD2	0.13366	0.25135	0.24293	0.35597	0.40663	0.28185	0.23846	0.25283	0.00386	0.08643	0.31798	0.3877	0.21937	0.29585	0.18365	0.06043	0.36676	0.46558	0.45965	0.30965	0.14308	0.14677	0.01322	0.06895	0.012	0.18735	0.62817	0.64821	0.55339	0.47678	0.56153	0.55995	0.69723	0.77958	0.89611	0.9422	0.9378	0.92828	0.87067	0.88592	0.82892	0.64033	0.79485	0.78294	0.67045	0.64585	0.5563	0.40612	0.24705
VVD2	0.18397	0.30608	0.30119	0.41865	0.47595	0.35174	0.31103	0.32722	0.07683	0.01552	0.24923	0.32026	0.15053	0.2284	0.11755	0.12205	0.42529	0.51557	0.51321	0.36713	0.20827	0.2176	0.08681	0.0085	0.06222	0.26057	0.68408	0.70204	0.60881	0.5402	0.62169	0.61894	0.7443	0.82098	0.92168	0.94359	0.93465	0.92261	0.86234	0.88153	0.82952	0.64356	0.76691	0.76412	0.70283	0.671	0.55426	0.41915	0.28757
VVD2	0.16874	0.2892	0.28145	0.3925	0.44538	0.31696	0.27411	0.28988	0.03504	0.05831	0.29311	0.36404	0.19405	0.27195	0.15875	0.08513	0.39427	0.48954	0.48592	0.33573	0.17015	0.17788	0.04422	0.03526	0.02051	0.22137	0.6581	0.67692	0.58016	0.50939	0.59008	0.59501	0.7302	0.80961	0.92267	0.95708	0.95309	0.94284	0.88444	0.90091	0.84791	0.66078	0.79851	0.7882	0.69861	0.66657	0.56043	0.41422	0.26464
VVD2	0.15712	0.28443	0.28142	0.41262	0.48493	0.37132	0.32523	0.34289	0.09332	0.00234	0.23963	0.31339	0.13256	0.21364	0.0921	0.1603	0.46396	0.55849	0.55327	0.40765	0.24071	0.24242	0.10467	0.01645	0.07509	0.26552	0.69508	0.71441	0.6097	0.54902	0.627	0.63816	0.77192	0.84365	0.93942	0.96712	0.94577	0.93182	0.86159	0.88028	0.81903	0.6183	0.77858	0.8009	0.73677	0.71543	0.61075	0.47859	0.33855
VVD2	0.17889	0.30402	0.29842	0.42195	0.49035	0.37138	0.32678	0.3438	0.09203	0.000855	0.23993	0.31202	0.13447	0.21337	0.09571	0.15272	0.45804	0.55016	0.54561	0.39876	0.2348	0.24013	0.10408	0.02133	0.07948	0.27304	0.69632	0.71612	0.62308	0.56193	0.63243	0.64545	0.78139	0.85169	0.94669	0.96455	0.95052	0.93615	0.87111	0.89112	0.83531	0.64017	0.77561	0.78934	0.73316	0.70126	0.58611	0.45445	0.32019
VVD2	0.1572	0.28503	0.28164	0.41276	0.49259	0.38348	0.33764	0.35481	0.1051	0.01489	0.22844	0.3021	0.11844	0.19935	0.07536	0.17901	0.48176	0.57629	0.57023	0.42493	0.25805	0.25783	0.11844	0.0312	0.09122	0.27728	0.69904	0.71904	0.62269	0.56622	0.63295	0.65023	0.79292	0.85973	0.94991	0.97081	0.94798	0.93339	0.86376	0.8823	0.82204	0.62274	0.78057	0.81033	0.75873	0.73157	0.62177	0.4941	0.3566
VVD2	0.15245	0.28239	0.28186	0.42857	0.52094	0.4237	0.3708	0.39191	0.15137	0.06426	0.18168	0.25659	0.06603	0.14867	0.01872	0.24045	0.53423	0.6272	0.6198	0.47979	0.3133	0.30724	0.16591	0.0708	0.13393	0.30665	0.71714	0.73788	0.6324	0.58815	0.65282	0.67749	0.81684	0.87625	0.95074	0.9667	0.92974	0.91244	0.83398	0.85472	0.78572	0.57657	0.75128	0.80999	0.77987	0.76099	0.65612	0.54282	0.41396
VVD2	0.18469	0.31663	0.32103	0.47059	0.57217	0.48361	0.43233	0.45448	0.21811	0.13366	0.11246	0.18891	0.0034	0.079	0.05126	0.30442	0.58847	0.67329	0.66821	0.53625	0.37747	0.37224	0.23299	0.13996	0.20273	0.36724	0.75256	0.77025	0.6682	0.63397	0.68828	0.71677	0.85078	0.90356	0.95731	0.95202	0.90743	0.88771	0.80633	0.8307	0.76307	0.55774	0.71569	0.79302	0.8097	0.78629	0.66493	0.5704	0.46398
VVD2	0.14078	0.27423	0.28168	0.44927	0.56971	0.50425	0.44983	0.47268	0.25413	0.17621	0.06723	0.14312	0.05399	0.02921	0.10604	0.36049	0.62875	0.71325	0.70502	0.58054	0.42457	0.4105	0.27202	0.17084	0.23472	0.37813	0.7435	0.76219	0.65396	0.63094	0.67902	0.71668	0.84762	0.8902	0.9268	0.92277	0.8616	0.84057	0.74724	0.7732	0.69682	0.48274	0.67302	0.78213	0.80893	0.80318	0.69886	0.61999	0.51977
VVD2	0.10175	0.23413	0.24399	0.40861	0.53175	0.47093	0.41184	0.43712	0.21976	0.14855	0.09623	0.17236	0.02763	0.05626	0.08333	0.3429	0.60793	0.69786	0.6877	0.56371	0.40255	0.38178	0.2394	0.13317	0.19746	0.33286	0.70307	0.72033	0.60365	0.58613	0.632	0.67654	0.81976	0.86352	0.90497	0.91817	0.85415	0.83512	0.74427	0.76475	0.68196	0.46807	0.68809	0.80548	0.81107	0.81019	0.72367	0.64031	0.52191
VVD2	0.00927	0.12455	0.1484	0.35905	0.51395	0.50425	0.42983	0.46473	0.29409	0.24288	0.00352	0.07408	0.13601	0.04861	0.20032	0.46544	0.6849	0.77598	0.75818	0.65608	0.49945	0.45461	0.3137	0.1818	0.24965	0.33407	0.66857	0.68663	0.5281	0.5395	0.59944	0.65264	0.78016	0.80358	0.80966	0.84306	0.73078	0.70712	0.58811	0.60751	0.49679	0.26153	0.58387	0.78226	0.79843	0.85257	0.82236	0.77324	0.66136
VVD2	0.19776	0.12835	0.13699	0.06489	0.02049	0.01143	0.05343	0.04679	0.1975	0.22926	0.39	0.43412	0.29733	0.34836	0.23709	0.03208	0.16309	0.2662	0.2443	0.13444	0.01302	0.05812	0.17615	0.25846	0.20927	0.1332	0.1742	0.19115	0.12999	0.10999	0.11333	0.18462	0.37146	0.41857	0.51147	0.62289	0.60676	0.61324	0.57734	0.56842	0.49383	0.36405	0.63748	0.6815	0.48014	0.47914	0.52455	0.4007	0.18881
VVD2	0.04548	0.01795	0.06896	0.14872	0.19537	0.34691	0.3545	0.37548	0.58587	0.64845	0.7636	0.78493	0.7189	0.74207	0.68726	0.536	0.28721	0.18406	0.19509	0.34097	0.48297	0.47869	0.57454	0.58749	0.55569	0.38382	0.02109	0.00456	0.02873	0.06818	0.07923	0.04494	0.16419	0.26667	0.47766	0.60577	0.72441	0.75302	0.80226	0.78376	0.77724	0.73105	0.79719	0.60175	0.24361	0.14007	0.14302	0.07901	0.34517
VVD2	0.37048	0.38502	0.34048	0.26853	0.262	0.15493	0.20274	0.17166	0.04177	0.02384	0.07606	0.08176	0.06467	0.05796	0.05935	0.04068	0.10167	0.09	0.10781	0.04259	0.02533	0.07938	0.04888	0.10752	0.12504	0.25581	0.31998	0.32359	0.48296	0.43595	0.32239	0.34645	0.4363	0.45635	0.47661	0.33086	0.43514	0.4322	0.47851	0.51175	0.57665	0.60596	0.28725	0.14819	0.26893	0.089	0.12936	0.17003	0.12771
VVD2	0.36121	0.377	0.40915	0.44409	0.42997	0.42652	0.42391	0.45624	0.4889	0.48531	0.50589	0.49857	0.47902	0.47655	0.44225	0.36828	0.30042	0.2322	0.25608	0.314	0.38977	0.43253	0.47947	0.50366	0.48384	0.48035	0.34414	0.32992	0.29573	0.31575	0.3337	0.28062	0.12675	0.10639	0.00443	0.15027	0.19404	0.21368	0.2351	0.21215	0.18131	0.17629	0.35946	0.30015	0.00514	0.01805	0.11075	0.00213	0.21021
VVD2	0.33217	0.42971	0.48141	0.67539	0.78481	0.81977	0.77756	0.83141	0.81052	0.78601	0.67824	0.62648	0.72965	0.68007	0.73162	0.80146	0.82074	0.78665	0.79864	0.82421	0.8281	0.83509	0.80809	0.75063	0.7772	0.78543	0.77528	0.77262	0.65146	0.70433	0.75419	0.73441	0.62833	0.5907	0.42831	0.26425	0.12295	0.0802	0.03179	0.01666	0.02536	0.15486	0.153	0.0793	0.47557	0.54265	0.39147	0.52753	0.72432
VVD2	0.43535	0.52092	0.56836	0.74155	0.85058	0.89031	0.86893	0.91501	0.90908	0.88351	0.79736	0.75299	0.83355	0.79385	0.8265	0.85384	0.85156	0.78708	0.80872	0.85117	0.88667	0.91074	0.90245	0.87399	0.89653	0.90376	0.82205	0.81373	0.74476	0.80147	0.81879	0.79586	0.67227	0.61794	0.42419	0.19489	0.06767	0.01951	0.07994	0.02434	0.03576	0.1263	0.24315	0.02424	0.4805	0.50467	0.28861	0.45741	0.71692
289	0.65967	0.74935	0.75983	0.82414	0.85752	0.76689	0.76765	0.79683	0.65962	0.58249	0.46333	0.41567	0.49089	0.45597	0.48124	0.52477	0.65294	0.60878	0.64087	0.61415	0.61355	0.68254	0.65059	0.66812	0.69418	0.83949	0.89952	0.89386	0.90874	0.88733	0.86518	0.83502	0.78732	0.79257	0.70155	0.45642	0.44155	0.40935	0.37357	0.4243	0.46497	0.40353	0.11006	0.13966	0.55377	0.45468	0.13632	0.19829	0.3962
290	0.73427	0.8038	0.79702	0.80094	0.80453	0.68346	0.70943	0.72222	0.5705	0.48461	0.38961	0.35379	0.39949	0.38035	0.38068	0.38994	0.52852	0.47288	0.51171	0.47736	0.49228	0.58207	0.56348	0.6179	0.63466	0.80332	0.83916	0.83055	0.91468	0.87435	0.81539	0.78648	0.75422	0.76531	0.69143	0.41843	0.45607	0.43004	0.4293	0.48258	0.55686	0.54438	0.12829	0.07573	0.48774	0.32853	0.03192	0.01402	0.22177
291	0.6954	0.74028	0.70808	0.61988	0.55422	0.37385	0.41788	0.41025	0.22296	0.12869	0.05812	0.03616	0.04369	0.04026	0.01744	0.0077	0.18233	0.14358	0.1838	0.12121	0.12305	0.22931	0.21592	0.30379	0.31039	0.52641	0.61973	0.6066	0.74147	0.65463	0.58738	0.54599	0.55777	0.60834	0.62831	0.41237	0.53091	0.5229	0.58118	0.61707	0.72096	0.76276	0.29261	0.09495	0.33853	0.12877	0.21322	0.25055	0.12711
292	0.71691	0.74666	0.75054	0.72697	0.73376	0.68105	0.74305	0.73675	0.69172	0.64241	0.64038	0.63126	0.60474	0.6154	0.56127	0.4547	0.46254	0.34901	0.39912	0.43541	0.53568	0.63654	0.68528	0.78476	0.76992	0.8558	0.67606	0.64687	0.78627	0.77847	0.69223	0.64584	0.53328	0.50349	0.35428	0.02235	0.05399	0.02484	0.04632	0.09996	0.21328	0.29306	0.23483	0.27571	0.26701	0.10753	0.26583	0.13443	0.18546
293	0.59472	0.69806	0.72368	0.83796	0.92961	0.8864	0.89259	0.90933	0.78629	0.71992	0.58654	0.53544	0.6308	0.58801	0.62492	0.67968	0.79628	0.74869	0.78105	0.76257	0.76505	0.82482	0.79286	0.79608	0.81423	0.92133	0.94921	0.9347	0.94066	0.95173	0.93084	0.91165	0.86312	0.84844	0.71942	0.46535	0.41408	0.37474	0.31538	0.37007	0.39743	0.32575	0.08134	0.17575	0.65335	0.57101	0.24793	0.34222	0.55919
294	0.50592	0.61199	0.65328	0.81716	0.94567	0.95618	0.9502	0.97445	0.89705	0.84932	0.72062	0.66883	0.77529	0.72884	0.77591	0.83358	0.9045	0.85294	0.88007	0.88596	0.89695	0.93554	0.90592	0.88491	0.90397	0.95623	0.93708	0.9241	0.89416	0.93849	0.9303	0.91981	0.84753	0.80918	0.63727	0.38955	0.28943	0.24331	0.1551	0.21152	0.21413	0.12085	0.03901	0.14175	0.65577	0.62328	0.34142	0.47764	0.71344
295	0.37385	0.49434	0.54519	0.76006	0.9199	0.95593	0.92427	0.9589	0.88261	0.84216	0.68281	0.62092	0.76363	0.70117	0.77936	0.89045	0.97198	0.94778	0.96335	0.96003	0.93909	0.94913	0.89499	0.83149	0.86284	0.89517	0.93179	0.92576	0.83517	0.89312	0.91624	0.91992	0.86932	0.82815	0.66268	0.47115	0.33153	0.28359	0.16449	0.21606	0.17712	0.03039	0.02511	0.27206	0.72281	0.74277	0.52802	0.65411	0.83673
296	0.32731	0.44952	0.5025	0.73027	0.89959	0.94485	0.90684	0.94488	0.87283	0.83616	0.67198	0.60903	0.76051	0.69552	0.7817	0.906	0.98575	0.9688	0.98065	0.9763	0.94777	0.94778	0.88665	0.81183	0.84651	0.86913	0.91531	0.91223	0.80729	0.86984	0.89848	0.90654	0.86388	0.81988	0.65487	0.47972	0.32923	0.28079	0.1539	0.20449	0.15328	0.00835	0.02928	0.29729	0.72841	0.76295	0.5719	0.69701	0.86537
297	0.24879	0.37042	0.42843	0.67489	0.85748	0.92563	0.88147	0.92128	0.8678	0.84091	0.67826	0.61535	0.77215	0.70476	0.79741	0.93007	0.99402	0.9831	0.98995	0.99068	0.95925	0.94602	0.88312	0.7947	0.83028	0.82996	0.87167	0.87037	0.74634	0.81934	0.85911	0.8707	0.82709	0.77574	0.60556	0.45298	0.28376	0.23475	0.09664	0.14461	0.07908	0.0946	0.00435	0.3028	0.71239	0.77419	0.61998	0.75059	0.90654
298	0.19051	0.32065	0.3789	0.63477	0.82444	0.88688	0.8325	0.87514	0.80202	0.7741	0.5892	0.5206	0.69565	0.61955	0.72873	0.89464	0.98479	0.99354	0.99591	0.97925	0.9233	0.90059	0.82016	0.71666	0.75773	0.76662	0.86419	0.86486	0.71844	0.7862	0.83948	0.85518	0.84139	0.79988	0.65385	0.53753	0.36475	0.31761	0.17514	0.21727	0.13676	0.05733	0.10545	0.40831	0.762	0.83231	0.70175	0.80646	0.91637
299	0.13755	0.25877	0.32337	0.58749	0.78687	0.8787	0.82917	0.86976	0.83164	0.81819	0.65315	0.59015	0.75482	0.6847	0.78759	0.93447	0.98571	0.98512	0.98611	0.98849	0.94943	0.91973	0.8507	0.74743	0.78259	0.7596	0.80758	0.80702	0.66071	0.74106	0.79371	0.80677	0.7756	0.72069	0.55295	0.43474	0.24759	0.19906	0.05294	0.09359	0.01135	0.17496	0.00135	0.32921	0.7009	0.79064	0.68026	0.80823	0.93764
300	0.03254	0.16001	0.2264	0.5046	0.713	0.80768	0.74946	0.78966	0.7377	0.72667	0.54181	0.47375	0.65696	0.57902	0.69962	0.88161	0.95498	0.9786	0.97195	0.95782	0.89186	0.84757	0.76071	0.63874	0.6783	0.65769	0.76326	0.76616	0.5943	0.66937	0.73602	0.75469	0.75782	0.71302	0.57393	0.50597	0.31133	0.26683	0.11409	0.14463	0.04368	0.16785	0.10038	0.43717	0.72754	0.83711	0.77021	0.86865	0.94029
301	0.02935	0.1601	0.22598	0.50023	0.70312	0.7811	0.71722	0.76113	0.68802	0.67458	0.4756	0.40456	0.59613	0.51458	0.64371	0.84067	0.93617	0.96857	0.96275	0.93678	0.85659	0.81223	0.7139	0.58867	0.6296	0.62646	0.76972	0.77173	0.59193	0.66321	0.73332	0.75116	0.77487	0.74007	0.62115	0.56781	0.3803	0.33643	0.19117	0.21711	0.11371	0.1052	0.1719	0.49822	0.76054	0.85996	0.79321	0.87176	0.91769
302	0.03822	0.16458	0.22593	0.50281	0.71183	0.79883	0.74352	0.78532	0.7298	0.71635	0.53298	0.46735	0.64954	0.57626	0.6979	0.87666	0.95385	0.97549	0.97	0.95253	0.88707	0.84638	0.75702	0.63969	0.67975	0.66647	0.77398	0.77826	0.61596	0.683	0.74041	0.75985	0.76536	0.72184	0.58615	0.51149	0.3248	0.27763	0.12962	0.16242	0.06652	0.15036	0.09752	0.42585	0.71396	0.81672	0.74393	0.83881	0.914
303	0.02029	0.11276	0.16704	0.43673	0.65368	0.73004	0.67966	0.71568	0.63306	0.61493	0.41232	0.34236	0.53672	0.45801	0.59129	0.79886	0.91224	0.95283	0.94337	0.90219	0.8128	0.76833	0.6639	0.54434	0.58819	0.59559	0.75901	0.7661	0.6063	0.65194	0.70658	0.73108	0.78093	0.74916	0.64663	0.59988	0.42476	0.38139	0.23837	0.26456	0.16621	0.06252	0.22037	0.53133	0.75617	0.85063	0.79014	0.85068	0.87773
304	0.14136	0.00372	0.05079	0.33218	0.54117	0.61318	0.53948	0.58095	0.48449	0.46668	0.24452	0.16877	0.38127	0.29053	0.44298	0.69383	0.83215	0.90667	0.88608	0.82544	0.69931	0.63554	0.51274	0.3623	0.41453	0.42171	0.66763	0.68077	0.47101	0.51539	0.60903	0.6425	0.71706	0.70268	0.64521	0.67989	0.49698	0.46098	0.30649	0.32232	0.19311	0.06207	0.35409	0.66583	0.76007	0.89157	0.90356	0.91983	0.86113
305	0.17604	0.04331	0.01372	0.30292	0.5094	0.59594	0.51812	0.56078	0.48461	0.47153	0.26095	0.18861	0.39712	0.30876	0.45834	0.70403	0.82243	0.89769	0.87203	0.82005	0.69873	0.62841	0.51104	0.35379	0.40538	0.39046	0.61876	0.63585	0.41696	0.47077	0.57011	0.60598	0.66661	0.6467	0.58214	0.62895	0.43519	0.40031	0.23577	0.25204	0.11573	0.14125	0.30796	0.63531	0.71599	0.86921	0.90874	0.934	0.87445
306	0.19905	0.06173	0.01283	0.25797	0.44283	0.49244	0.40552	0.44775	0.32819	0.30343	0.06992	0.00781	0.21167	0.11528	0.27582	0.5541	0.72379	0.82527	0.79676	0.71493	0.56011	0.48929	0.35329	0.18768	0.24509	0.26673	0.58554	0.60493	0.37271	0.40677	0.52407	0.56234	0.66022	0.66581	0.65743	0.75303	0.5824	0.55554	0.40118	0.40748	0.26492	0.000544	0.48698	0.76828	0.74751	0.8904	0.94696	0.91699	0.7865
307	0.02688	0.11912	0.16104	0.413	0.58732	0.59918	0.52273	0.56324	0.40671	0.36219	0.11541	0.03356	0.25349	0.15682	0.31098	0.58265	0.78551	0.87299	0.85556	0.76375	0.61437	0.56767	0.43096	0.28624	0.34437	0.40968	0.73437	0.75052	0.5514	0.5718	0.66884	0.70189	0.79749	0.80943	0.79555	0.83118	0.68539	0.65472	0.51345	0.53057	0.41169	0.15655	0.52306	0.76758	0.82365	0.916	0.88893	0.86035	0.7709
308	0.04235	0.18391	0.23239	0.50054	0.68989	0.73196	0.66598	0.70705	0.59084	0.55173	0.32911	0.25253	0.45909	0.37057	0.50863	0.74325	0.89827	0.95561	0.94233	0.88052	0.76861	0.7285	0.61378	0.48052	0.53308	0.56704	0.79654	0.81123	0.63204	0.67102	0.751	0.78152	0.82716	0.81306	0.73845	0.71111	0.54619	0.50706	0.35394	0.38538	0.27799	0.03521	0.33744	0.6191	0.79551	0.89319	0.83241	0.86275	0.85814
309	0.06059	0.08065	0.12883	0.40129	0.58594	0.6287	0.55134	0.59245	0.47116	0.43511	0.20509	0.12719	0.34197	0.24832	0.39714	0.65598	0.82248	0.90279	0.88118	0.80835	0.67346	0.61952	0.49412	0.34253	0.3985	0.42801	0.70648	0.72527	0.51704	0.55404	0.65567	0.69207	0.75817	0.75487	0.71245	0.74476	0.57631	0.54336	0.38503	0.40623	0.28036	0.02358	0.41813	0.69946	0.78037	0.9025	0.89647	0.89658	0.83137
310	3e-05	0.14467	0.17775	0.40947	0.55816	0.53995	0.46035	0.49934	0.31837	0.26185	0.01072	0.07102	0.14739	0.04985	0.20232	0.48302	0.71347	0.8121	0.79278	0.68558	0.52258	0.48147	0.33991	0.19622	0.25675	0.34524	0.71177	0.73169	0.53612	0.5442	0.64507	0.68054	0.78609	0.81403	0.83148	0.88507	0.76098	0.73577	0.60166	0.61723	0.5014	0.24874	0.60774	0.81189	0.81647	0.89618	0.86941	0.81105	0.6919
311	0.14687	0.29282	0.32416	0.54948	0.69623	0.66992	0.60436	0.64127	0.46073	0.39487	0.15193	0.07188	0.27979	0.18863	0.32587	0.57782	0.80146	0.87393	0.86428	0.7677	0.63044	0.6091	0.48095	0.35906	0.41592	0.51473	0.82957	0.84677	0.68785	0.69543	0.77206	0.80109	0.87508	0.89385	0.87655	0.85778	0.74161	0.70983	0.57997	0.61011	0.51642	0.27948	0.5216	0.71713	0.83267	0.88278	0.78586	0.76041	0.71449
312	0.08606	0.23214	0.26322	0.48211	0.62064	0.58488	0.50848	0.55397	0.36306	0.30186	0.05132	0.02997	0.1838	0.0895	0.23503	0.50474	0.74121	0.82865	0.81513	0.70843	0.5544	0.52555	0.38709	0.25849	0.31711	0.42057	0.77318	0.78977	0.61441	0.61925	0.69595	0.72967	0.83342	0.86155	0.87047	0.89029	0.77702	0.748	0.62462	0.64877	0.54436	0.30133	0.59201	0.78345	0.83368	0.88909	0.82239	0.77236	0.68172
313	0.023	0.16302	0.18202	0.37327	0.48659	0.4254	0.34874	0.38461	0.16941	0.10007	0.15412	0.2343	0.0239	0.11935	0.0285	0.31515	0.58449	0.69545	0.67696	0.54656	0.36754	0.33662	0.18985	0.058	0.1192	0.24614	0.66667	0.68826	0.51126	0.4933	0.58765	0.62426	0.75293	0.80548	0.8716	0.94537	0.86008	0.84134	0.73079	0.74556	0.63852	0.39602	0.72412	0.85843	0.7853	0.83748	0.80709	0.70253	0.54182
314	0.02808	0.1618	0.16812	0.32546	0.42588	0.3441	0.28369	0.30647	0.07062	0.00715	0.25852	0.33665	0.13821	0.23027	0.08964	0.19053	0.48304	0.59723	0.58232	0.43751	0.25435	0.23379	0.08822	0.02667	0.03165	0.18743	0.63141	0.65116	0.50437	0.46072	0.55364	0.58363	0.72814	0.79403	0.89031	0.96723	0.91471	0.90208	0.81285	0.82165	0.73387	0.51338	0.7964	0.86809	0.75809	0.78182	0.73419	0.59933	0.42048
315	0.03821	0.17206	0.17618	0.32376	0.42624	0.33816	0.28544	0.30806	0.06389	0.01224	0.26402	0.34167	0.14591	0.23481	0.09681	0.1764	0.47294	0.58268	0.5722	0.42568	0.24648	0.231	0.08467	0.01822	0.0368	0.20341	0.64307	0.65835	0.52739	0.47463	0.55499	0.5791	0.73949	0.80435	0.9022	0.96935	0.92673	0.9151	0.83757	0.84339	0.76594	0.55941	0.81204	0.86879	0.77341	0.77855	0.71062	0.57361	0.40033
316	0.01985	0.11031	0.11383	0.25718	0.34628	0.25471	0.19536	0.21721	0.02627	0.09903	0.34839	0.42402	0.22957	0.31832	0.17927	0.10149	0.40025	0.52176	0.50662	0.35571	0.16593	0.14369	0.00524	0.11533	0.05874	0.10379	0.56614	0.584	0.43944	0.38479	0.47283	0.50144	0.67112	0.74481	0.86435	0.96789	0.92859	0.92144	0.84645	0.84825	0.75925	0.54971	0.84723	0.89609	0.73559	0.75307	0.72212	0.56653	0.35695
317	0.04626	0.07307	0.06805	0.18452	0.25298	0.14713	0.09559	0.10856	0.14125	0.21758	0.45573	0.52578	0.34418	0.42736	0.29696	0.02179	0.28542	0.41296	0.39625	0.23628	0.04296	0.02388	0.12274	0.22436	0.17091	0.00217	0.47952	0.5003	0.37153	0.30302	0.39305	0.42343	0.59957	0.6835	0.83127	0.95333	0.9386	0.93804	0.87694	0.87475	0.79485	0.59963	0.88405	0.88643	0.66521	0.6721	0.6549	0.4735	0.23731
318	0.05475	0.05562	0.04355	0.13527	0.18597	0.06674	0.0154	0.03158	0.22142	0.2978	0.52571	0.59125	0.42199	0.50019	0.37613	0.10949	0.19972	0.32915	0.31281	0.14854	0.04468	0.05936	0.20305	0.2941	0.24358	0.06286	0.4192	0.43996	0.32475	0.24678	0.33196	0.35844	0.54667	0.63589	0.80382	0.93538	0.94024	0.94267	0.89735	0.88933	0.82032	0.63924	0.90511	0.87536	0.61962	0.61194	0.6	0.40253	0.14969
319	0.07401	0.01331	0.01344	0.02605	0.03271	0.10999	0.15044	0.14279	0.39396	0.46977	0.66907	0.72333	0.58645	0.65108	0.54909	0.31128	0.00547	0.12452	0.11004	0.05511	0.24335	0.25035	0.38104	0.45043	0.40458	0.20986	0.27315	0.29255	0.20805	0.10583	0.18613	0.20449	0.40292	0.50843	0.71421	0.86993	0.91639	0.92772	0.91508	0.89794	0.84518	0.7055	0.93429	0.831	0.50202	0.47011	0.47114	0.24364	0.03759
320	0.12371	0.07771	0.12281	0.16733	0.21524	0.37411	0.38466	0.39789	0.62588	0.69522	0.83165	0.86267	0.78612	0.82335	0.76177	0.58652	0.30979	0.1887	0.20182	0.36092	0.52344	0.51771	0.61833	0.64542	0.61612	0.42066	0.01596	0.03442	0.01605	0.11516	0.05867	0.0474	0.15005	0.26616	0.51114	0.68505	0.79056	0.81648	0.85141	0.82244	0.80663	0.73556	0.88124	0.67354	0.25353	0.19032	0.21556	0.03978	0.33926
321	0.08124	0.07528	0.13263	0.25904	0.35744	0.52831	0.50553	0.53595	0.73192	0.79357	0.86153	0.86984	0.85865	0.86701	0.852	0.7602	0.53118	0.43939	0.44426	0.58113	0.69742	0.66979	0.73065	0.70522	0.69651	0.50628	0.16343	0.15234	0.09425	0.23842	0.21796	0.22357	0.04703	0.06958	0.32083	0.46831	0.62504	0.66052	0.74263	0.70607	0.74055	0.75366	0.75562	0.46074	0.04707	0.06263	0.05936	0.31023	0.57523
322	0.05668	0.03673	0.03212	0.21193	0.3455	0.53204	0.48612	0.52341	0.69656	0.76122	0.78034	0.77273	0.80795	0.79422	0.81843	0.7949	0.60134	0.54517	0.53983	0.65545	0.72619	0.67233	0.70007	0.6309	0.63407	0.44106	0.19072	0.18274	0.05444	0.2029	0.22167	0.23673	0.09985	0.00741	0.23587	0.31556	0.51021	0.54504	0.65724	0.63094	0.70609	0.77636	0.60769	0.25796	0.07945	0.23642	0.2901	0.51271	0.70488
323	0.21108	0.25874	0.20625	0.12796	0.05765	0.14332	0.13071	0.14626	0.39592	0.49173	0.61663	0.64501	0.5887	0.61477	0.58203	0.45787	0.17438	0.10009	0.09437	0.24331	0.36217	0.31084	0.39017	0.3698	0.34759	0.11153	0.24907	0.26219	0.3243	0.18911	0.19323	0.1929	0.34488	0.4517	0.64625	0.68144	0.82004	0.83564	0.88824	0.88532	0.92448	0.89364	0.78576	0.53526	0.31575	0.17057	0.04202	0.16794	0.34158
324	0.40047	0.48633	0.45533	0.44785	0.43213	0.24549	0.24697	0.25031	0.0135	0.11734	0.28741	0.33496	0.23558	0.27933	0.22552	0.08161	0.20946	0.26023	0.2745	0.1387	0.03007	0.08894	0.00198	0.00432	0.03506	0.27329	0.6041	0.61064	0.64905	0.54537	0.53771	0.5349	0.658	0.74045	0.85213	0.79217	0.87686	0.8726	0.88676	0.90408	0.9362	0.86464	0.71398	0.56659	0.56431	0.4193	0.1955	0.05659	0.01573
325	0.21482	0.32031	0.30033	0.34228	0.35823	0.1942	0.16734	0.17797	0.0973	0.19185	0.40439	0.46553	0.32378	0.38894	0.29626	0.08406	0.23212	0.32324	0.3252	0.17028	0.01427	0.04034	0.08214	0.12473	0.08192	0.14272	0.56738	0.57834	0.53835	0.44513	0.48263	0.48937	0.65179	0.74439	0.88654	0.91605	0.96192	0.96063	0.94632	0.95063	0.93279	0.80419	0.85209	0.7618	0.64666	0.5605	0.42258	0.25106	0.08865
326	0.19847	0.33173	0.33553	0.46459	0.54858	0.43833	0.39586	0.41892	0.16371	0.07655	0.16847	0.24433	0.06202	0.14539	0.02598	0.21758	0.51526	0.60192	0.60214	0.46388	0.3068	0.31498	0.18148	0.10322	0.15385	0.3411	0.74477	0.7559	0.65935	0.60449	0.66495	0.67585	0.81305	0.87872	0.95643	0.96056	0.93537	0.92046	0.85599	0.87014	0.8195	0.63727	0.76859	0.80128	0.79805	0.76141	0.62119	0.50619	0.38943
327	0.17962	0.3173	0.32578	0.46905	0.56634	0.4714	0.42711	0.44898	0.20096	0.11693	0.13217	0.21087	0.02341	0.111	0.01277	0.25898	0.55056	0.63646	0.63707	0.50375	0.3463	0.35019	0.21713	0.13183	0.1834	0.36158	0.76116	0.77016	0.65919	0.61181	0.68168	0.69319	0.82149	0.88391	0.95113	0.95673	0.91757	0.90186	0.8277	0.84276	0.78524	0.59586	0.75136	0.80365	0.81313	0.79078	0.65654	0.55033	0.43807
328	0.15108	0.29724	0.32067	0.51447	0.64967	0.59808	0.54072	0.57172	0.35608	0.28316	0.0299	0.05337	0.1506	0.05667	0.192	0.44521	0.7032	0.78239	0.77975	0.66668	0.51768	0.50683	0.37376	0.26705	0.3222	0.46074	0.82014	0.82947	0.68639	0.66984	0.74866	0.76579	0.87048	0.90954	0.92852	0.92094	0.83513	0.81103	0.70662	0.7281	0.64923	0.43422	0.64458	0.78052	0.85637	0.87223	0.75319	0.69149	0.6139
329	0.13529	0.28343	0.31913	0.54705	0.70629	0.69073	0.62762	0.66378	0.48306	0.4224	0.17508	0.0912	0.30011	0.20529	0.34318	0.59057	0.81119	0.87948	0.87557	0.78412	0.64964	0.62843	0.5013	0.38293	0.43874	0.54075	0.85007	0.85891	0.69825	0.70733	0.78822	0.80839	0.88579	0.90355	0.87885	0.8545	0.73331	0.70229	0.57747	0.60384	0.51202	0.28396	0.52251	0.7228	0.86022	0.90551	0.79757	0.77785	0.73818
330	0.1653	0.31147	0.35197	0.58907	0.7593	0.76169	0.70087	0.73727	0.57821	0.5225	0.28615	0.20424	0.40807	0.31587	0.44836	0.67874	0.87297	0.92653	0.92465	0.84973	0.73315	0.71269	0.59566	0.47989	0.53361	0.61638	0.87731	0.88465	0.72815	0.75275	0.82683	0.84801	0.90074	0.90375	0.84656	0.79362	0.65874	0.62374	0.49258	0.52412	0.43473	0.21196	0.42699	0.65427	0.85512	0.90389	0.78246	0.79427	0.79531
331	0.18125	0.3264	0.36469	0.59943	0.76727	0.76735	0.70674	0.74449	0.58645	0.52978	0.29594	0.215	0.41742	0.32665	0.45768	0.68534	0.87884	0.92989	0.92832	0.85364	0.73974	0.72071	0.60449	0.49139	0.54526	0.62939	0.88417	0.89253	0.74398	0.76726	0.83618	0.85804	0.90695	0.90856	0.84758	0.78641	0.65443	0.61837	0.48831	0.52225	0.43549	0.21341	0.4127	0.63768	0.84748	0.89248	0.76507	0.77996	0.78915
332	0.20446	0.34674	0.38975	0.62894	0.80328	0.81746	0.75754	0.79708	0.65847	0.60696	0.38427	0.30541	0.50126	0.41341	0.53843	0.74978	0.91858	0.95698	0.9573	0.89772	0.79963	0.78142	0.6749	0.56466	0.61675	0.68454	0.89761	0.90353	0.75568	0.79294	0.85487	0.87632	0.90619	0.8964	0.81107	0.72951	0.58722	0.54778	0.41377	0.45162	0.36718	0.15239	0.33329	0.5793	0.83771	0.8855	0.74934	0.79007	0.83064
333	0.20648	0.34216	0.39406	0.64505	0.82875	0.87306	0.81506	0.85774	0.76119	0.72278	0.52424	0.45136	0.63414	0.55303	0.66767	0.84989	0.96935	0.98823	0.98958	0.95745	0.88685	0.86637	0.77742	0.67061	0.71693	0.74764	0.88575	0.88948	0.74233	0.80132	0.85701	0.87686	0.87224	0.84113	0.71445	0.60713	0.44451	0.39986	0.25824	0.3008	0.21827	0.01478	0.18063	0.4639	0.78788	0.85193	0.71711	0.80121	0.89072
334	0.20071	0.32949	0.38682	0.64247	0.83113	0.89663	0.8434	0.88546	0.81914	0.79059	0.61137	0.54365	0.71424	0.6391	0.74438	0.90307	0.98716	0.992	0.99462	0.98191	0.93138	0.90997	0.83488	0.73291	0.774	0.77933	0.86405	0.86547	0.72212	0.79333	0.8451	0.86207	0.83508	0.79046	0.63774	0.51428	0.34061	0.29333	0.14921	0.19414	0.11503	0.07577	0.07681	0.37965	0.74375	0.81745	0.68433	0.79598	0.91739
335	0.20314	0.34127	0.39215	0.64289	0.82485	0.86291	0.80621	0.84748	0.74178	0.70069	0.49596	0.42179	0.60777	0.52527	0.64207	0.83101	0.96184	0.98499	0.98626	0.94797	0.87124	0.85169	0.75888	0.65148	0.69802	0.73684	0.89238	0.89645	0.74892	0.80025	0.86056	0.8788	0.88185	0.85579	0.73803	0.63598	0.47727	0.43368	0.2931	0.33422	0.25178	0.04531	0.21591	0.49033	0.79966	0.86216	0.72674	0.80085	0.87979
336	0.23348	0.37072	0.42	0.6639	0.84286	0.87594	0.8255	0.86348	0.75289	0.70888	0.50563	0.4318	0.61367	0.53273	0.64514	0.82655	0.95998	0.97803	0.9826	0.94467	0.87245	0.85926	0.76955	0.6703	0.71473	0.76156	0.91155	0.91358	0.77665	0.82317	0.87913	0.89316	0.89599	0.87125	0.75287	0.63728	0.48567	0.44212	0.30699	0.34892	0.27471	0.076	0.21663	0.47914	0.80487	0.855	0.70118	0.77582	0.86497
337	0.25957	0.40301	0.44384	0.66945	0.83191	0.82891	0.77837	0.81488	0.66385	0.6061	0.3841	0.30633	0.49563	0.41152	0.52946	0.72987	0.90809	0.93995	0.94486	0.88328	0.78976	0.78387	0.68061	0.58373	0.6321	0.71669	0.92923	0.93288	0.80178	0.8283	0.88322	0.89672	0.92739	0.92315	0.8424	0.74192	0.6147	0.57543	0.45179	0.49098	0.42102	0.21896	0.34794	0.56663	0.84176	0.86952	0.70344	0.73975	0.7923
338	0.30029	0.44391	0.47896	0.68469	0.83454	0.81097	0.76822	0.8	0.62877	0.56263	0.33836	0.26052	0.44482	0.36213	0.47498	0.67129	0.86831	0.89981	0.90807	0.83752	0.74231	0.7472	0.64438	0.55933	0.60573	0.71346	0.94202	0.94435	0.83024	0.84304	0.89296	0.90188	0.93954	0.94573	0.88048	0.77312	0.66628	0.63	0.51877	0.5571	0.50003	0.3113	0.39934	0.58047	0.85002	0.85433	0.6639	0.68459	0.73308
339	0.36093	0.4997	0.52105	0.6807	0.79297	0.72142	0.6912	0.71643	0.50631	0.42517	0.20047	0.12506	0.29677	0.21945	0.32159	0.51311	0.74924	0.78584	0.79766	0.70563	0.60306	0.62633	0.5218	0.45957	0.50182	0.65543	0.92484	0.92602	0.84693	0.82884	0.86648	0.86751	0.92742	0.95718	0.93473	0.82842	0.76813	0.73859	0.65628	0.69142	0.65801	0.49366	0.51051	0.60963	0.83257	0.79335	0.572	0.55201	0.57693
340	0.45735	0.56892	0.5641	0.62006	0.66262	0.5261	0.53424	0.53798	0.29806	0.20176	0.0157	0.04339	0.07513	0.02207	0.08242	0.21922	0.47731	0.50189	0.52427	0.41755	0.33273	0.39185	0.30861	0.30535	0.33255	0.54261	0.80824	0.80418	0.81642	0.74995	0.75171	0.73602	0.80557	0.86356	0.89516	0.77063	0.79919	0.78324	0.7635	0.79386	0.81715	0.72943	0.56914	0.51416	0.68402	0.56407	0.28977	0.22343	0.24325
341	0.68334	0.73939	0.73161	0.72302	0.73317	0.63201	0.69278	0.68052	0.55254	0.47405	0.41055	0.38769	0.40629	0.4022	0.37729	0.34479	0.45781	0.38631	0.42995	0.40763	0.449	0.54823	0.55322	0.63121	0.62668	0.77713	0.75178	0.73652	0.87273	0.83332	0.75788	0.71947	0.66543	0.67091	0.58878	0.30145	0.3546	0.32954	0.34386	0.39792	0.49602	0.52508	0.0524	0.02927	0.39786	0.22575	0.14797	0.08993	0.14334
342	0.63646	0.59822	0.57516	0.43137	0.36192	0.2896	0.39788	0.36184	0.36533	0.3311	0.43214	0.46196	0.34407	0.40174	0.28588	0.07731	0.0258	0.10685	0.056	0.00347	0.14409	0.25999	0.3535	0.51357	0.47068	0.54273	0.26864	0.24084	0.48953	0.4582	0.31838	0.2635	0.14302	0.1197	0.01597	0.29368	0.17782	0.18606	0.09542	0.05707	0.10862	0.29391	0.36865	0.54993	0.12354	0.33005	0.66492	0.56034	0.25296
343	0.54111	0.46866	0.44782	0.27977	0.18951	0.15542	0.26548	0.22731	0.30548	0.29958	0.46386	0.5134	0.35173	0.42839	0.28472	0.01868	0.11694	0.26628	0.21837	0.1272	0.05602	0.16172	0.28936	0.45952	0.40532	0.41597	0.04232	0.01313	0.26821	0.25531	0.10891	0.05431	0.09965	0.1407	0.26396	0.55396	0.44178	0.44675	0.34584	0.31375	0.14728	0.07817	0.57294	0.74646	0.34219	0.5218	0.79281	0.65748	0.33444
344	0.46604	0.37836	0.36241	0.20144	0.11664	0.11771	0.22225	0.18715	0.31423	0.32754	0.52035	0.578	0.40246	0.48564	0.33681	0.05134	0.13762	0.2946	0.2506	0.13501	0.06536	0.1569	0.29722	0.46237	0.40498	0.36828	0.06476	0.09374	0.15004	0.15929	0.01433	0.03293	0.20671	0.26453	0.41025	0.68951	0.59673	0.60185	0.50581	0.4763	0.31855	0.08725	0.70232	0.8396	0.43471	0.58407	0.81032	0.64897	0.3152
345	0.56992	0.52225	0.52243	0.43821	0.40972	0.42415	0.51091	0.49044	0.59291	0.59345	0.72911	0.76507	0.64312	0.7034	0.58571	0.35011	0.1912	0.03223	0.07823	0.18903	0.37538	0.46401	0.58073	0.71699	0.67342	0.6435	0.23375	0.20629	0.40941	0.44213	0.3098	0.26908	0.08477	0.01025	0.18568	0.51768	0.4753	0.49671	0.44508	0.39807	0.2612	0.08996	0.68246	0.72766	0.18813	0.32427	0.60825	0.40855	0.02599
346	0.55349	0.50439	0.50506	0.42496	0.39893	0.41946	0.50534	0.48645	0.59719	0.59985	0.73962	0.77698	0.65401	0.71482	0.59785	0.36099	0.19392	0.03385	0.07856	0.19275	0.38104	0.46669	0.58478	0.71894	0.6749	0.63629	0.21772	0.19205	0.39206	0.42988	0.29897	0.26058	0.07336	0.00525	0.20541	0.53617	0.49811	0.52071	0.47108	0.42403	0.29002	0.12125	0.70552	0.74241	0.20497	0.33387	0.60801	0.40394	0.02057
347	0.45392	0.36385	0.34816	0.19374	0.11216	0.1206	0.2211	0.18912	0.32781	0.34321	0.54069	0.60012	0.42473	0.50862	0.36061	0.07626	0.12269	0.28103	0.23886	0.11905	0.0834	0.17047	0.31165	0.47301	0.41604	0.36723	0.07788	0.10328	0.13559	0.15315	0.00918	0.03324	0.21106	0.27704	0.42934	0.7098	0.62302	0.63039	0.53938	0.50756	0.35485	0.1301	0.73633	0.85977	0.45246	0.59336	0.80854	0.63965	0.30198
348	0.46198	0.38611	0.383	0.27496	0.22811	0.26445	0.35356	0.32952	0.48136	0.50063	0.68165	0.73344	0.57989	0.65376	0.51946	0.25214	0.04087	0.12167	0.0805	0.04939	0.25301	0.33058	0.46682	0.60855	0.55712	0.48682	0.02555	0.000495	0.20882	0.24971	0.11623	0.07836	0.11619	0.19889	0.3902	0.68916	0.64194	0.65816	0.59578	0.55619	0.42191	0.22716	0.7931	0.84622	0.36953	0.48402	0.70283	0.49945	0.13147
349	0.45609	0.38829	0.39162	0.30661	0.27498	0.32406	0.40886	0.38712	0.54276	0.56341	0.73551	0.78311	0.64031	0.70974	0.5826	0.32371	0.10917	0.05366	0.01329	0.12012	0.32225	0.39546	0.5285	0.6604	0.61095	0.53241	0.0696	0.04469	0.23688	0.28713	0.16104	0.12372	0.07909	0.16648	0.37206	0.67465	0.64521	0.66469	0.61567	0.57347	0.44826	0.26759	0.80881	0.83209	0.33198	0.43222	0.65038	0.43461	0.05738
350	0.39313	0.29659	0.2849	0.13764	0.05878	0.08808	0.18438	0.15216	0.31583	0.34167	0.55214	0.6149	0.43373	0.51994	0.37038	0.07876	0.14652	0.30511	0.26561	0.13453	0.07305	0.15076	0.29805	0.45277	0.39417	0.32066	0.14499	0.17009	0.05537	0.08379	0.05353	0.09552	0.28439	0.35553	0.51395	0.77613	0.7015	0.70796	0.62242	0.5934	0.45065	0.22561	0.79259	0.89694	0.50616	0.62413	0.80574	0.62743	0.29318
351	0.35412	0.24657	0.23093	0.06782	0.02447	0.00422	0.09914	0.06631	0.23934	0.27027	0.49377	0.5616	0.37004	0.46027	0.30547	0.00808	0.22601	0.38056	0.34344	0.21168	0.00377	0.07025	0.22104	0.37774	0.31772	0.23793	0.22998	0.25392	0.026	0.00024	0.13691	0.17731	0.35977	0.43005	0.57557	0.81721	0.7345	0.73709	0.64391	0.61935	0.47707	0.24361	0.79739	0.91552	0.56705	0.68278	0.83818	0.66929	0.35421
352	0.37371	0.28037	0.27596	0.15275	0.09107	0.1418	0.22917	0.20231	0.38328	0.4163	0.62436	0.68508	0.51269	0.59483	0.45136	0.16711	0.07542	0.23533	0.19827	0.05766	0.15224	0.22045	0.36689	0.50863	0.45269	0.35749	0.12546	0.14964	0.05447	0.09896	0.03066	0.06732	0.26457	0.34931	0.53064	0.7941	0.74437	0.75459	0.68565	0.65396	0.52497	0.31626	0.84513	0.90432	0.48734	0.58356	0.75	0.5499	0.20411
353	0.36061	0.26652	0.26212	0.13697	0.07369	0.12505	0.21443	0.18509	0.36716	0.40119	0.61181	0.67365	0.49868	0.58252	0.43823	0.1503	0.09449	0.25426	0.21718	0.07592	0.13434	0.20247	0.35018	0.49253	0.43508	0.33877	0.14388	0.1685	0.03597	0.0799	0.05001	0.08795	0.2868	0.36841	0.54578	0.80342	0.75186	0.76107	0.69037	0.6602	0.53124	0.31908	0.84498	0.90902	0.50199	0.59633	0.7584	0.56117	0.21897
354	0.30764	0.19942	0.18939	0.03629	0.04945	0.00459	0.08709	0.05323	0.24161	0.28054	0.5087	0.57751	0.38565	0.47658	0.32432	0.02403	0.22761	0.38186	0.34686	0.20668	0.00294	0.06946	0.22263	0.37139	0.31007	0.21233	0.26619	0.29085	0.07772	0.04174	0.17265	0.2122	0.40255	0.47507	0.62608	0.85283	0.78295	0.78546	0.69852	0.67648	0.54459	0.31387	0.83107	0.92956	0.59017	0.68603	0.81755	0.64104	0.32951
355	0.31201	0.19454	0.17228	0.01921	0.13323	0.11782	0.01838	0.05887	0.1087	0.1403	0.37446	0.44772	0.2425	0.33872	0.17772	0.12788	0.35733	0.50466	0.46845	0.34311	0.14026	0.06492	0.08822	0.25135	0.18761	0.116	0.33274	0.35664	0.12076	0.10873	0.24536	0.28793	0.45774	0.51267	0.6251	0.83486	0.72976	0.72498	0.61547	0.5993	0.45288	0.20224	0.75066	0.91179	0.63428	0.75596	0.8896	0.74886	0.46907
356	0.33851	0.224	0.20138	0.01388	0.09676	0.08397	0.01503	0.02258	0.14189	0.17098	0.40091	0.4725	0.27097	0.36588	0.20641	0.09615	0.32194	0.47157	0.43463	0.31035	0.10673	0.02942	0.1221	0.28596	0.22378	0.15563	0.29489	0.31837	0.08059	0.06773	0.20752	0.24756	0.41858	0.47646	0.59593	0.8192	0.71558	0.71286	0.60569	0.5862	0.43855	0.19211	0.75419	0.91017	0.61084	0.7368	0.88331	0.73734	0.44717
357	0.26656	0.1465	0.12789	0.04976	0.15666	0.12263	0.03017	0.06419	0.12497	0.16566	0.4057	0.47959	0.27538	0.37042	0.21178	0.09235	0.34132	0.48808	0.45558	0.32165	0.11576	0.05019	0.10494	0.25963	0.19719	0.10332	0.36296	0.3858	0.16438	0.14115	0.27185	0.30936	0.48654	0.55063	0.67578	0.87743	0.78827	0.78482	0.68378	0.66819	0.53224	0.28983	0.80131	0.93365	0.65753	0.75745	0.86509	0.7112	0.43006
358	0.21679	0.08434	0.05407	0.16143	0.29871	0.28884	0.19358	0.23338	0.05956	0.02116	0.22668	0.30574	0.0889	0.18892	0.02514	0.27896	0.50982	0.64194	0.6117	0.49311	0.3003	0.23349	0.0808	0.08144	0.01738	0.05781	0.48401	0.50555	0.27166	0.27064	0.39988	0.43987	0.58959	0.63432	0.71048	0.86982	0.74851	0.73574	0.61229	0.6072	0.46543	0.20672	0.71056	0.90222	0.72764	0.84079	0.92176	0.81215	0.58535
359	0.23641	0.1032	0.06209	0.18099	0.33776	0.36038	0.25975	0.30486	0.16236	0.13513	0.10534	0.18452	0.03427	0.06689	0.0977	0.39395	0.5906	0.7131	0.68202	0.58326	0.40415	0.32891	0.18359	0.01236	0.07522	0.11759	0.49865	0.51889	0.26837	0.28888	0.42279	0.46354	0.58869	0.61599	0.656	0.80348	0.65261	0.63497	0.49523	0.49288	0.34158	0.07626	0.60603	0.84922	0.72465	0.86357	0.95571	0.88186	0.68598
360	0.21827	0.08285	0.03413	0.22595	0.39818	0.44059	0.34088	0.3872	0.2639	0.24222	0.00739	0.07183	0.14665	0.04597	0.20836	0.49338	0.66647	0.7767	0.74753	0.66403	0.49947	0.42339	0.28537	0.11293	0.17385	0.19764	0.53821	0.55619	0.3024	0.33719	0.46821	0.50773	0.61085	0.62502	0.63341	0.75737	0.58856	0.56652	0.41673	0.41852	0.26586	0.000112	0.52064	0.79694	0.73214	0.88121	0.9633	0.91999	0.76077
361	0.17921	0.04165	0.01033	0.27935	0.45968	0.50937	0.41252	0.45936	0.34311	0.32153	0.08874	0.00936	0.22744	0.12779	0.28735	0.56316	0.72528	0.82479	0.79863	0.72389	0.57009	0.49762	0.36446	0.19502	0.25479	0.27293	0.58715	0.60342	0.35371	0.39588	0.52178	0.56007	0.64795	0.65467	0.64133	0.73975	0.56311	0.53684	0.38219	0.38959	0.24022	0.02385	0.47086	0.76223	0.7495	0.89668	0.95769	0.93468	0.80682
362	0.10746	0.03034	0.08711	0.36533	0.55575	0.61763	0.5256	0.57303	0.47355	0.45287	0.22899	0.15064	0.36376	0.26707	0.4187	0.67498	0.81442	0.89406	0.87264	0.81446	0.68224	0.6162	0.49409	0.33197	0.38904	0.39543	0.65694	0.67078	0.43216	0.48726	0.60271	0.63832	0.69756	0.68914	0.63806	0.69043	0.50311	0.47087	0.31009	0.32615	0.18458	0.07367	0.36815	0.6824	0.7588	0.90122	0.92877	0.94253	0.87073
363	0.15746	0.02198	0.03273	0.30893	0.49626	0.55763	0.46075	0.50924	0.40863	0.39003	0.16489	0.08686	0.30172	0.2038	0.35936	0.62501	0.76915	0.85888	0.83416	0.77016	0.6284	0.55624	0.42972	0.26168	0.32041	0.32569	0.60792	0.62374	0.37585	0.42726	0.54934	0.58794	0.65881	0.65519	0.6202	0.69912	0.51358	0.48437	0.32435	0.33639	0.1879	0.07497	0.40284	0.71225	0.74126	0.89195	0.94528	0.94397	0.84391
364	0.20672	0.07284	0.02089	0.24924	0.42957	0.48528	0.38535	0.43254	0.32431	0.30628	0.07758	0.000372	0.21596	0.11701	0.27664	0.55231	0.70722	0.80905	0.78133	0.70839	0.55435	0.4777	0.3454	0.17263	0.23256	0.24249	0.55489	0.57194	0.31618	0.36033	0.49015	0.53029	0.61749	0.62248	0.61108	0.72113	0.54166	0.51637	0.36001	0.36653	0.21246	0.0525	0.4611	0.75604	0.72763	0.88333	0.96041	0.93687	0.80168
365	0.134	0.00128	0.05936	0.34425	0.53923	0.61855	0.52552	0.57351	0.49551	0.48299	0.27017	0.19469	0.4022	0.3078	0.45625	0.70215	0.81778	0.89284	0.87068	0.82412	0.70118	0.63044	0.51531	0.35095	0.40596	0.3921	0.62619	0.63914	0.39449	0.45868	0.57635	0.61227	0.65813	0.64128	0.57686	0.63127	0.4332	0.40035	0.23502	0.25135	0.10584	0.14893	0.30793	0.6393	0.72558	0.88262	0.92446	0.95305	0.892
366	0.10119	0.02676	0.09117	0.37901	0.57801	0.67179	0.58222	0.6315	0.57694	0.56932	0.37204	0.30003	0.49807	0.40832	0.5479	0.77275	0.85996	0.91935	0.89962	0.86987	0.76688	0.69837	0.59562	0.43741	0.48918	0.45743	0.64001	0.65171	0.41536	0.49185	0.60027	0.63495	0.65609	0.62583	0.53199	0.55775	0.35112	0.31492	0.14617	0.16807	0.02793	0.21844	0.20549	0.55581	0.69893	0.85708	0.8874	0.9463	0.92557
367	0.17833	0.05052	0.01094	0.29642	0.48843	0.57633	0.47818	0.52811	0.4627	0.45589	0.24949	0.17597	0.38093	0.28706	0.43597	0.68225	0.78681	0.8658	0.84055	0.79708	0.67315	0.59535	0.48165	0.31195	0.36747	0.34097	0.57227	0.58725	0.33342	0.40142	0.52458	0.56247	0.60795	0.58993	0.52873	0.60125	0.39855	0.36701	0.19942	0.2134	0.06082	0.19658	0.29137	0.6307	0.6896	0.85964	0.92929	0.95691	0.88272
368	0.16693	0.04099	0.02405	0.31363	0.50945	0.60743	0.51202	0.56134	0.50884	0.50604	0.30761	0.23585	0.43563	0.34441	0.48858	0.72191	0.80956	0.87971	0.85612	0.82306	0.71038	0.63391	0.52737	0.36076	0.41348	0.37624	0.57931	0.59171	0.34071	0.41577	0.53671	0.5718	0.60257	0.57765	0.50016	0.55917	0.35012	0.31659	0.14715	0.1627	0.01275	0.23767	0.23692	0.58685	0.67758	0.85101	0.91356	0.95768	0.90586
369	0.05611	0.05776	0.12928	0.41612	0.61669	0.73969	0.65873	0.70695	0.70148	0.70706	0.54651	0.48379	0.65623	0.57835	0.69666	0.87219	0.89824	0.92685	0.91226	0.91773	0.85587	0.79216	0.71715	0.57422	0.61704	0.54828	0.62739	0.63384	0.41588	0.51445	0.60821	0.63682	0.60961	0.556	0.41113	0.39055	0.17157	0.13033	0.03919	0.00999	0.13778	0.35611	0.00661	0.38203	0.62049	0.78247	0.796	0.9087	0.96083
370	0.06833	0.03709	0.11	0.39413	0.59075	0.72609	0.64502	0.69341	0.71096	0.72364	0.58052	0.52297	0.6843	0.6114	0.72197	0.88111	0.88125	0.90262	0.88765	0.90586	0.8566	0.79056	0.72546	0.58522	0.62497	0.53734	0.58203	0.58882	0.37278	0.48042	0.5713	0.60012	0.55861	0.49687	0.33986	0.31636	0.09346	0.05208	0.11716	0.08699	0.21483	0.42522	0.06614	0.31775	0.56438	0.73406	0.76053	0.88797	0.95347
371	0.13477	0.03104	0.04295	0.33022	0.52369	0.66474	0.57675	0.62603	0.6482	0.66593	0.52309	0.46601	0.6288	0.55454	0.66918	0.83637	0.83412	0.86599	0.84677	0.86289	0.80487	0.73027	0.66226	0.5128	0.55342	0.45751	0.51937	0.52717	0.29435	0.4027	0.50693	0.53604	0.50175	0.444	0.3013	0.31136	0.08423	0.04541	0.12625	0.10177	0.24036	0.45604	0.04369	0.3431	0.53838	0.72588	0.78734	0.9026	0.93871
372	0.02681	0.06449	0.14107	0.41325	0.60366	0.75637	0.68761	0.73179	0.78565	0.80718	0.6987	0.65043	0.78422	0.724	0.81206	0.92398	0.87662	0.872	0.86219	0.90771	0.89375	0.83605	0.79645	0.67525	0.70533	0.59382	0.55485	0.5558	0.36405	0.48349	0.56033	0.5807	0.50071	0.42412	0.23323	0.17294	0.04991	0.09335	0.25584	0.222	0.33258	0.50865	0.21633	0.16839	0.4837	0.64853	0.656	0.82044	0.94308
373	0.07137	0.1381	0.21164	0.44796	0.61799	0.77826	0.72899	0.76791	0.86465	0.89344	0.83633	0.80331	0.89432	0.85448	0.90774	0.95147	0.84701	0.80458	0.80305	0.88128	0.91712	0.87583	0.87081	0.78443	0.80209	0.66908	0.51597	0.51265	0.372	0.50173	0.544	0.55766	0.43261	0.33633	0.10517	0.01745	0.2245	0.26968	0.41366	0.37219	0.45174	0.57709	0.41582	0.04953	0.35993	0.49868	0.46762	0.67796	0.8805
374	0.07867	0.11394	0.18409	0.38193	0.52104	0.69303	0.65219	0.68664	0.83351	0.87704	0.8762	0.86085	0.90743	0.8881	0.90945	0.8934	0.72731	0.66178	0.66198	0.76961	0.84391	0.80783	0.83502	0.77273	0.77877	0.61403	0.36912	0.36336	0.25359	0.39376	0.41676	0.42589	0.26737	0.15806	0.08975	0.22611	0.41812	0.46061	0.58544	0.54341	0.60519	0.68387	0.58616	0.24183	0.17994	0.31427	0.29751	0.53346	0.77133
375	0.07516	0.105	0.17587	0.36384	0.49647	0.6731	0.63976	0.6699	0.8289	0.87604	0.89009	0.87874	0.91201	0.89838	0.91	0.87428	0.69166	0.61842	0.62074	0.73722	0.82318	0.79056	0.82783	0.77402	0.77446	0.60394	0.3341	0.3252	0.22439	0.36555	0.38708	0.39051	0.21782	0.10769	0.14433	0.28506	0.47269	0.51323	0.63123	0.59047	0.64521	0.70581	0.62836	0.29496	0.13374	0.26646	0.24832	0.49042	0.74043
376	0.14514	0.1727	0.23976	0.41475	0.5447	0.7124	0.69211	0.71796	0.8722	0.91364	0.93337	0.92394	0.94872	0.93956	0.94198	0.88966	0.70847	0.62259	0.63053	0.7489	0.84737	0.82704	0.87083	0.83309	0.83006	0.67118	0.3795	0.36888	0.29651	0.43129	0.43737	0.43674	0.25598	0.14405	0.11807	0.29447	0.46926	0.51104	0.62004	0.57544	0.61251	0.65827	0.652	0.3371	0.1391	0.24704	0.18882	0.43981	0.72036
377	0.19489	0.18542	0.23966	0.34768	0.43273	0.59337	0.59769	0.61207	0.80487	0.85378	0.93798	0.94997	0.91668	0.93434	0.89428	0.76597	0.5337	0.41878	0.43306	0.57597	0.71893	0.7164	0.79719	0.80296	0.78479	0.61403	0.22773	0.2141	0.20504	0.33312	0.30503	0.29486	0.08479	0.03315	0.29971	0.5071	0.64025	0.67626	0.74791	0.70357	0.70335	0.68177	0.80523	0.55706	0.06566	0.00802	0.06403	0.20172	0.52453
378	0.17433	0.12514	0.16577	0.20505	0.23795	0.39068	0.41181	0.41518	0.64432	0.70427	0.85171	0.88562	0.79604	0.83948	0.76141	0.56864	0.29001	0.1598	0.1757	0.33694	0.51089	0.51818	0.63109	0.6718	0.64021	0.45597	0.00388	0.01202	0.02713	0.14378	0.09187	0.07471	0.14872	0.26406	0.51166	0.71014	0.80093	0.82754	0.86105	0.82376	0.79576	0.71265	0.90952	0.73293	0.2959	0.24307	0.29011	0.03086	0.29307
379	0.2071	0.18535	0.23643	0.32209	0.38933	0.54627	0.55853	0.56789	0.77075	0.8216	0.92666	0.94541	0.89246	0.91961	0.86423	0.71074	0.46331	0.34016	0.35654	0.50707	0.66313	0.66739	0.76073	0.78151	0.75815	0.58584	0.17277	0.15651	0.16873	0.2917	0.25235	0.23759	0.01968	0.09665	0.36069	0.57412	0.69255	0.72629	0.78425	0.74027	0.72661	0.68074	0.8425	0.62033	0.13297	0.07024	0.14554	0.1209	0.45294
380	0.27197	0.24476	0.2892	0.35338	0.40903	0.55082	0.57387	0.57863	0.77477	0.81933	0.93273	0.95512	0.89034	0.92366	0.85785	0.68734	0.44347	0.31044	0.33169	0.48121	0.64747	0.6637	0.76324	0.80118	0.77495	0.61699	0.18929	0.17212	0.21315	0.32797	0.27418	0.25525	0.03401	0.08152	0.34569	0.58537	0.6842	0.71743	0.76253	0.71543	0.68388	0.62077	0.85286	0.661	0.14831	0.11273	0.22016	0.04698	0.3991
381	0.26664	0.20469	0.23369	0.22867	0.23397	0.35895	0.4007	0.39454	0.61381	0.6646	0.832	0.87404	0.75849	0.81523	0.7153	0.48801	0.21268	0.06681	0.09088	0.2514	0.44314	0.47126	0.59747	0.67049	0.63144	0.47122	0.00625	0.02491	0.06784	0.16709	0.08906	0.06381	0.16436	0.27368	0.5136	0.74798	0.79991	0.82359	0.82909	0.78903	0.72824	0.60714	0.92167	0.8089	0.34804	0.34138	0.43672	0.18281	0.1672
382	0.23703	0.17033	0.19924	0.18799	0.18949	0.3179	0.36209	0.35351	0.57939	0.63383	0.80918	0.85368	0.73167	0.79141	0.68793	0.45357	0.17074	0.02495	0.0486	0.21217	0.40585	0.43258	0.56242	0.63777	0.59676	0.43191	0.05123	0.07096	0.02372	0.12159	0.04406	0.01776	0.21028	0.31797	0.55293	0.77729	0.82639	0.84792	0.84884	0.81139	0.75038	0.62072	0.92888	0.82319	0.37902	0.37032	0.45451	0.20389	0.1391
383	0.15923	0.06953	0.09055	0.04231	0.01144	0.13633	0.18487	0.1705	0.41511	0.47834	0.68549	0.74186	0.59181	0.66347	0.54423	0.28702	0.01491	0.15641	0.1362	0.03051	0.2292	0.25337	0.39515	0.48095	0.43378	0.25966	0.23293	0.25143	0.14522	0.057	0.13481	0.16148	0.38603	0.48647	0.69099	0.8767	0.90282	0.9151	0.89568	0.86822	0.80176	0.646	0.94372	0.88159	0.52636	0.51483	0.55253	0.32414	0.01515
384	0.13833	0.03542	0.05001	0.03257	0.09294	0.01742	0.07277	0.05035	0.2929	0.35795	0.58104	0.64369	0.47506	0.55561	0.42503	0.15191	0.15071	0.2893	0.2696	0.10573	0.09382	0.12231	0.2704	0.36872	0.31751	0.15247	0.33339	0.35374	0.2323	0.15912	0.24207	0.27395	0.48874	0.57651	0.75219	0.91563	0.91703	0.92162	0.88268	0.86305	0.78701	0.60767	0.91762	0.90326	0.60818	0.60561	0.62846	0.4236	0.13963
385	0.09464	0.03321	0.04162	0.19732	0.32625	0.26747	0.21565	0.24578	0.02559	0.03403	0.27714	0.35084	0.1537	0.24612	0.10092	0.17922	0.45533	0.57316	0.55682	0.41572	0.23486	0.20069	0.05234	0.06211	0.01057	0.12035	0.54363	0.56111	0.42248	0.38581	0.47075	0.50117	0.67694	0.73119	0.8226	0.91803	0.85916	0.84796	0.76674	0.76117	0.67654	0.46695	0.78193	0.87512	0.75208	0.77482	0.75396	0.62151	0.42381
386	0.35767	0.46973	0.50489	0.6944	0.85632	0.87129	0.84774	0.8849	0.79196	0.74622	0.5887	0.53117	0.67336	0.61109	0.69141	0.81916	0.92466	0.91181	0.92433	0.89902	0.86859	0.87642	0.81161	0.75516	0.78664	0.82998	0.88473	0.8873	0.82236	0.87108	0.87481	0.8935	0.88203	0.83666	0.6899	0.50243	0.38833	0.34394	0.23755	0.28802	0.25844	0.10771	0.07464	0.29776	0.71047	0.70154	0.49153	0.59537	0.75355
387	0.32376	0.38563	0.43024	0.58678	0.74859	0.84158	0.85501	0.87861	0.9142	0.91239	0.86368	0.83753	0.90046	0.87702	0.90108	0.89857	0.8461	0.76774	0.79	0.84789	0.91344	0.925	0.9283	0.91859	0.92188	0.87199	0.68215	0.66942	0.6642	0.74933	0.71146	0.7137	0.61938	0.52534	0.29195	0.03988	0.08345	0.13178	0.21554	0.16494	0.15795	0.21677	0.36793	0.11755	0.43368	0.42772	0.22129	0.42594	0.70808
388	0.54463	0.49898	0.48942	0.39347	0.37994	0.37972	0.47513	0.45788	0.53425	0.53087	0.65284	0.68844	0.57704	0.63368	0.52624	0.31203	0.18417	0.03633	0.0824	0.17253	0.34448	0.43186	0.5321	0.67242	0.629	0.61706	0.23876	0.21399	0.43365	0.4526	0.30787	0.2762	0.1387	0.06535	0.11391	0.44316	0.3844	0.40486	0.34217	0.30044	0.15582	0.00901	0.59489	0.65275	0.13599	0.30029	0.59143	0.41299	0.05843
389	0.52886	0.46923	0.46478	0.36633	0.33507	0.3548	0.4437	0.42455	0.54238	0.54974	0.70163	0.74457	0.61221	0.67698	0.55474	0.31173	0.1379	0.02095	0.0231	0.13663	0.32824	0.4117	0.53223	0.67256	0.62561	0.58175	0.15289	0.12834	0.33942	0.3757	0.23568	0.19979	0.02454	0.05654	0.25061	0.57375	0.52477	0.5436	0.4847	0.44072	0.30309	0.12497	0.7174	0.76544	0.24999	0.38817	0.64801	0.44822	0.07457
390	0.50027	0.426	0.41791	0.29552	0.24145	0.25982	0.35167	0.32828	0.4614	0.47367	0.64895	0.69934	0.54631	0.61971	0.48465	0.22058	0.02875	0.13203	0.0892	0.03097	0.23067	0.31501	0.44713	0.59594	0.5449	0.49448	0.04951	0.02435	0.24551	0.27819	0.13692	0.09778	0.08454	0.16113	0.34243	0.6495	0.5873	0.60131	0.52989	0.49054	0.34804	0.14901	0.74722	0.82226	0.34647	0.48316	0.72138	0.52898	0.16499
391	0.55698	0.53182	0.54331	0.51892	0.5353	0.57497	0.6463	0.63811	0.74121	0.74127	0.84414	0.86782	0.78263	0.82546	0.73381	0.53841	0.38655	0.23341	0.27564	0.38579	0.5588	0.6327	0.73259	0.83874	0.8047	0.75979	0.36489	0.34244	0.50389	0.55712	0.44357	0.4133	0.22606	0.13744	0.09121	0.4328	0.43526	0.46621	0.45032	0.39554	0.28627	0.16548	0.68664	0.65094	0.06164	0.16554	0.44485	0.22098	0.17278
392	0.61743	0.6264	0.63958	0.65228	0.69402	0.7093	0.77039	0.7691	0.81086	0.78944	0.83151	0.83561	0.79751	0.81985	0.75912	0.62215	0.54199	0.40715	0.44953	0.52799	0.66498	0.7405	0.8068	0.89389	0.87297	0.87347	0.57023	0.55022	0.69064	0.73269	0.63027	0.6027	0.44787	0.37206	0.15277	0.19843	0.21041	0.24581	0.24824	0.18908	0.08976	0.01509	0.51287	0.46118	0.14615	0.03236	0.28837	0.08585	0.28978
393	0.60828	0.55305	0.53326	0.39827	0.33381	0.29621	0.39765	0.36986	0.42894	0.41185	0.54676	0.58632	0.45265	0.5186	0.39297	0.15833	0.04743	0.10152	0.05369	0.02858	0.20183	0.30649	0.41668	0.57543	0.5299	0.55071	0.19351	0.16949	0.41574	0.41201	0.2649	0.22183	0.07414	0.02287	0.1218	0.44733	0.35085	0.36327	0.27929	0.23836	0.07708	0.11386	0.54709	0.68375	0.21744	0.40014	0.70546	0.55796	0.21455
394	0.59809	0.53957	0.521	0.37911	0.30907	0.27316	0.37653	0.3459	0.4081	0.39363	0.53411	0.57527	0.43627	0.50459	0.37542	0.13368	0.01673	0.13327	0.08536	8e-06	0.17578	0.28129	0.39524	0.55709	0.50942	0.5278	0.16559	0.13919	0.38792	0.38329	0.23566	0.19002	0.04142	0.00841	0.14911	0.46837	0.36988	0.38116	0.293	0.25496	0.09148	0.10769	0.55233	0.6951	0.2361	0.41891	0.72092	0.57528	0.23465
395	0.43864	0.3382	0.30421	0.09081	0.0334	0.07473	0.0391	0.00395	0.09084	0.09461	0.2922	0.35558	0.16573	0.2562	0.10024	0.18335	0.3353	0.47575	0.43339	0.34281	0.15991	0.06043	0.07403	0.25589	0.19663	0.19784	0.17871	0.20493	0.07038	0.04477	0.10859	0.15799	0.28996	0.32246	0.40453	0.64712	0.5045	0.49882	0.37029	0.35207	0.17853	0.07369	0.56399	0.78855	0.49747	0.67899	0.89531	0.7934	0.5213
396	0.39616	0.29461	0.25579	0.02826	0.1069	0.16086	0.04338	0.08997	0.00924	0.00647	0.18812	0.25201	0.06043	0.15159	0.00344	0.28121	0.41669	0.54603	0.50509	0.42536	0.25442	0.15481	0.02503	0.15911	0.09964	0.11525	0.22769	0.25497	0.02415	0.01669	0.17002	0.22061	0.33265	0.35202	0.40632	0.62085	0.4639	0.45307	0.31322	0.30254	0.12776	0.13228	0.48803	0.74288	0.50904	0.694	0.89951	0.82599	0.58761
397	0.33873	0.22687	0.1828	0.06147	0.21231	0.27107	0.15641	0.20528	0.1213	0.11421	0.0901	0.15866	0.04183	0.05266	0.10436	0.38312	0.52072	0.6408	0.60262	0.52711	0.36283	0.26753	0.13694	0.04686	0.01356	0.000342	0.32841	0.35345	0.0771	0.12535	0.27658	0.3242	0.42373	0.43515	0.46355	0.64412	0.47575	0.46053	0.31163	0.3063	0.13508	0.13014	0.46205	0.73801	0.57219	0.75273	0.92381	0.8715	0.66774
398	0.2066	0.08174	0.02905	0.24353	0.42019	0.49052	0.38298	0.43625	0.35812	0.34619	0.13564	0.06217	0.27003	0.17427	0.32776	0.59236	0.71721	0.81105	0.78106	0.72234	0.58173	0.49868	0.37543	0.1994	0.26023	0.24431	0.51707	0.53751	0.27474	0.33612	0.46865	0.51426	0.57917	0.56993	0.53904	0.64222	0.45351	0.42617	0.26322	0.27412	0.1137	0.15273	0.36214	0.67958	0.66674	0.83653	0.93398	0.93328	0.81629
399	0.2483	0.12283	0.07186	0.19671	0.36759	0.43203	0.32261	0.37482	0.2874	0.27541	0.05994	0.01421	0.1962	0.09889	0.25633	0.5303	0.66698	0.77136	0.73918	0.67219	0.51995	0.43408	0.30561	0.12606	0.1872	0.17833	0.47998	0.50115	0.23259	0.28607	0.42363	0.46885	0.54824	0.54921	0.5391	0.66797	0.48405	0.4599	0.30029	0.30647	0.14208	0.12556	0.41966	0.72413	0.66414	0.8373	0.95101	0.92985	0.78292
400	0.14846	0.02641	0.03378	0.31564	0.50231	0.59398	0.49179	0.54591	0.49734	0.4926	0.29905	0.22914	0.42672	0.3368	0.4803	0.71445	0.80007	0.86975	0.84515	0.81165	0.69922	0.62089	0.51422	0.3469	0.40225	0.36283	0.56332	0.58035	0.32739	0.40717	0.52413	0.56616	0.59663	0.5694	0.49351	0.55067	0.34578	0.31172	0.1433	0.16268	0.00898	0.24635	0.21995	0.56966	0.65486	0.82492	0.89465	0.93983	0.88691
401	0.26528	0.14846	0.09052	0.18512	0.36272	0.45479	0.3458	0.39895	0.35004	0.35222	0.15867	0.0906	0.28903	0.19807	0.34799	0.59694	0.68806	0.7782	0.74657	0.70398	0.57245	0.48163	0.36794	0.18914	0.2455	0.20156	0.44218	0.46189	0.18993	0.26214	0.39365	0.43864	0.49304	0.47861	0.43819	0.5558	0.35402	0.32666	0.16166	0.16944	0.000963	0.26041	0.28709	0.62595	0.60682	0.79683	0.92389	0.93716	0.82376
402	0.4079	0.33915	0.27388	0.0242	0.13679	0.2984	0.19417	0.24215	0.31139	0.35853	0.25788	0.2175	0.35328	0.28963	0.40104	0.56447	0.52106	0.5814	0.54687	0.56724	0.49458	0.38644	0.32306	0.15836	0.19711	0.05581	0.13289	0.14703	0.11631	0.00708	0.11552	0.15845	0.15466	0.10643	0.02261	0.15814	0.05944	0.0829	0.23793	0.23646	0.40415	0.60818	0.04572	0.3203	0.29677	0.53217	0.74702	0.81684	0.74426
403	0.63029	0.61733	0.56722	0.40697	0.30954	0.14308	0.23122	0.20165	0.08201	0.00698	0.03042	0.04245	0.02551	0.00913	0.06664	0.17224	0.07309	0.14273	0.10123	0.13354	0.07454	0.04298	0.07652	0.21579	0.19422	0.36711	0.32116	0.31004	0.54481	0.45567	0.33901	0.30254	0.28804	0.31892	0.33149	0.09513	0.26235	0.26476	0.37003	0.39808	0.55239	0.68495	0.08432	0.18784	0.04263	0.20001	0.52928	0.54947	0.39206
404	0.68322	0.75384	0.75031	0.78224	0.81956	0.72381	0.75838	0.76492	0.6292	0.54984	0.45953	0.4273	0.47797	0.45847	0.46102	0.46991	0.59665	0.53626	0.5734	0.54395	0.56713	0.65162	0.63496	0.68601	0.69403	0.83443	0.83327	0.8253	0.92422	0.90078	0.83348	0.81944	0.77997	0.77221	0.67275	0.38686	0.41032	0.3799	0.37194	0.42784	0.50405	0.49135	0.07814	0.05732	0.50593	0.35342	0.00944	0.0582	0.28307
405	0.43538	0.55671	0.58947	0.7708	0.91256	0.8981	0.87515	0.90775	0.78024	0.71972	0.54527	0.48216	0.62806	0.5647	0.64493	0.77443	0.91329	0.90115	0.91809	0.88048	0.84197	0.86527	0.79551	0.74691	0.78053	0.86365	0.95982	0.95776	0.90209	0.92881	0.93602	0.94169	0.93032	0.90682	0.78195	0.58738	0.49106	0.44859	0.35041	0.40058	0.381	0.23867	0.16987	0.34895	0.76058	0.73347	0.48328	0.56573	0.71989
406	0.28513	0.42693	0.45148	0.63534	0.76168	0.70045	0.64309	0.68325	0.47854	0.40426	0.16646	0.08752	0.27971	0.19209	0.316	0.54388	0.7811	0.83653	0.83881	0.74	0.61689	0.61846	0.49748	0.40546	0.45762	0.5894	0.88859	0.8956	0.77186	0.77302	0.82662	0.84702	0.92395	0.9482	0.93138	0.8671	0.78304	0.75171	0.65006	0.68157	0.61943	0.42	0.5367	0.68326	0.85985	0.85254	0.68592	0.66122	0.64618
407	0.18763	0.3307	0.37468	0.60977	0.7825	0.78884	0.72863	0.77123	0.62458	0.57479	0.34697	0.26752	0.46566	0.37585	0.50526	0.72576	0.90351	0.9474	0.9466	0.88011	0.77539	0.75623	0.64455	0.53353	0.58439	0.65454	0.88358	0.88816	0.73165	0.76645	0.83284	0.85665	0.9029	0.89646	0.82376	0.75494	0.61631	0.5773	0.44636	0.47935	0.39583	0.18113	0.37444	0.61603	0.85599	0.90039	0.76867	0.79811	0.82063
408	0.28322	0.4232	0.44968	0.63612	0.77012	0.71539	0.66045	0.70082	0.50216	0.43266	0.19659	0.11852	0.3108	0.22463	0.34904	0.57405	0.8024	0.85317	0.85674	0.76304	0.64453	0.64409	0.52321	0.43247	0.48394	0.60954	0.89415	0.89935	0.77593	0.78191	0.83062	0.85255	0.93396	0.95092	0.92461	0.85234	0.76397	0.72982	0.62953	0.66097	0.59823	0.39798	0.50925	0.67018	0.86641	0.85604	0.68673	0.67141	0.66593
409	0.04505	0.18354	0.19866	0.36943	0.49	0.41852	0.35013	0.38741	0.15773	0.0907	0.16627	0.24699	0.03982	0.13539	0.01197	0.29228	0.57092	0.67658	0.66529	0.53094	0.35503	0.33021	0.18112	0.064	0.1223	0.26529	0.68327	0.69629	0.53892	0.51397	0.59775	0.62768	0.78086	0.83332	0.90237	0.96215	0.89164	0.87336	0.78288	0.78923	0.69936	0.47925	0.75982	0.87579	0.82969	0.84713	0.7844	0.67586	0.51753
410	0.04084	0.09356	0.10793	0.27772	0.39311	0.32514	0.25061	0.28583	0.05969	0.00288	0.25861	0.33769	0.12948	0.22583	0.07396	0.21903	0.49993	0.62088	0.60275	0.46196	0.27333	0.23786	0.08382	0.04382	0.01595	0.15191	0.59587	0.61311	0.43982	0.41204	0.50846	0.54329	0.71053	0.76726	0.85847	0.96038	0.88942	0.87638	0.78495	0.7833	0.68234	0.45234	0.79573	0.90902	0.78736	0.82423	0.80792	0.67885	0.47891
411	0.14318	0.024	0.02101	0.11297	0.19909	0.11604	0.04288	0.07137	0.16	0.21997	0.46281	0.53498	0.34175	0.43244	0.28541	0.00853	0.29996	0.43989	0.4163	0.26186	0.05819	0.01782	0.13746	0.26199	0.20388	0.05982	0.42407	0.44439	0.2757	0.22639	0.32848	0.36433	0.56126	0.63669	0.78132	0.94336	0.90085	0.89899	0.82801	0.81296	0.71192	0.496	0.87922	0.93772	0.68466	0.72241	0.75852	0.58184	0.31344
412	0.15287	0.03711	0.03744	0.08983	0.17185	0.08616	0.01336	0.04116	0.18964	0.25065	0.48971	0.55964	0.36959	0.45846	0.31345	0.02046	0.27236	0.41396	0.38965	0.23348	0.02855	0.01253	0.1676	0.29079	0.23231	0.08817	0.39761	0.42063	0.25649	0.20507	0.30351	0.34181	0.54245	0.61973	0.77026	0.93704	0.90057	0.90012	0.83292	0.81751	0.71623	0.50157	0.88322	0.93415	0.66454	0.6981	0.74148	0.55983	0.28393
413	0.10519	0.01891	0.02175	0.1655	0.25898	0.1769	0.10345	0.13234	0.09897	0.16397	0.4102	0.4834	0.2854	0.37635	0.22847	0.06612	0.35931	0.49406	0.47102	0.31843	0.11768	0.07945	0.07659	0.2022	0.14157	0.00281	0.47794	0.50187	0.33665	0.28992	0.38606	0.42496	0.61327	0.68381	0.81372	0.95406	0.90697	0.90229	0.82495	0.8166	0.71474	0.48992	0.85375	0.92453	0.70586	0.74055	0.76138	0.59683	0.34912
414	0.11598	0.000807	0.00481	0.1176	0.192	0.09711	0.02892	0.05381	0.18129	0.24893	0.48614	0.55494	0.36698	0.45301	0.31262	0.02181	0.27706	0.41635	0.39202	0.23273	0.03028	0.00556	0.15997	0.27827	0.21931	0.06616	0.41855	0.44529	0.29607	0.23786	0.33059	0.36753	0.56379	0.64121	0.79132	0.94403	0.91609	0.91599	0.84902	0.83798	0.74356	0.52841	0.87926	0.91732	0.65704	0.68168	0.71088	0.52853	0.26313
415	0.15498	0.03992	0.04122	0.08951	0.1664	0.08056	0.00538	0.03247	0.19345	0.25508	0.49245	0.5614	0.36986	0.45603	0.31115	0.01594	0.27342	0.41635	0.38955	0.23378	0.02806	0.01595	0.17374	0.30118	0.24051	0.09862	0.38843	0.41597	0.24996	0.1991	0.29777	0.33813	0.53453	0.6107	0.76175	0.93149	0.89454	0.89531	0.82319	0.80981	0.70166	0.47521	0.86552	0.92239	0.64172	0.68213	0.73763	0.55808	0.28042
416	0.12544	0.00147	0.00409	0.15811	0.25037	0.17541	0.09109	0.12664	0.09388	0.15497	0.40032	0.47344	0.27074	0.3623	0.21092	0.09012	0.37211	0.51006	0.48369	0.33458	0.13239	0.08574	0.07352	0.20896	0.14477	0.01215	0.46085	0.48843	0.30869	0.27253	0.37213	0.41632	0.59988	0.66592	0.79082	0.94112	0.88377	0.87881	0.79181	0.78569	0.67186	0.43238	0.82827	0.92148	0.69185	0.74118	0.78546	0.62877	0.37641
417	0.07425	0.06316	0.08158	0.27911	0.4072	0.36149	0.27565	0.31501	0.11039	0.05143	0.20313	0.28227	0.06572	0.16304	0.0055	0.29394	0.55616	0.67779	0.65483	0.52299	0.33506	0.28811	0.1325	0.0111	0.05433	0.16742	0.59763	0.62223	0.42855	0.41368	0.51766	0.56093	0.71113	0.75757	0.82909	0.93366	0.84066	0.82488	0.71372	0.71893	0.59984	0.34624	0.73391	0.88814	0.77103	0.83716	0.84873	0.73854	0.54692
418	0.02203	0.12085	0.15137	0.38106	0.53424	0.51764	0.4285	0.47512	0.29872	0.24622	0.00415	0.08511	0.13556	0.03675	0.19352	0.48028	0.7085	0.8102	0.78989	0.68136	0.51532	0.4672	0.32127	0.17372	0.23874	0.3233	0.69072	0.71286	0.51085	0.52219	0.62138	0.66558	0.77941	0.8026	0.81816	0.87734	0.75206	0.72725	0.59584	0.61104	0.489	0.22812	0.59852	0.81298	0.80507	0.88639	0.87531	0.81809	0.69068
419	0.00422	0.14733	0.18448	0.4291	0.59483	0.59628	0.50563	0.55732	0.40335	0.3572	0.11556	0.0354	0.25394	0.1559	0.30937	0.58261	0.78346	0.87145	0.85314	0.76141	0.6124	0.56369	0.42639	0.27877	0.34188	0.40562	0.72629	0.74622	0.54137	0.56921	0.66514	0.71004	0.79838	0.80601	0.78687	0.81976	0.67686	0.64741	0.50713	0.52736	0.40557	0.14627	0.50129	0.74958	0.80646	0.89586	0.87408	0.85088	0.76373
420	0.09467	0.23522	0.28149	0.53898	0.71803	0.74434	0.66243	0.71614	0.59725	0.55793	0.33608	0.25905	0.46466	0.37332	0.51186	0.74672	0.90145	0.95651	0.94526	0.88545	0.77381	0.73401	0.6181	0.48352	0.54075	0.57891	0.80725	0.82096	0.63088	0.68002	0.76088	0.79788	0.84032	0.8243	0.74567	0.7125	0.55059	0.51175	0.36487	0.39614	0.28673	0.04466	0.32657	0.61249	0.80404	0.8908	0.82437	0.86071	0.85985
421	0.23826	0.36153	0.41226	0.6563	0.83272	0.88028	0.8178	0.87115	0.80349	0.77185	0.59742	0.53298	0.70141	0.6277	0.73224	0.89401	0.97986	0.98469	0.98516	0.9691	0.91884	0.89828	0.821	0.72059	0.76425	0.77106	0.85479	0.86108	0.7194	0.79061	0.8352	0.8609	0.84046	0.79354	0.64334	0.51464	0.35048	0.3028	0.16339	0.20889	0.13194	0.06376	0.06745	0.36648	0.72742	0.79116	0.65934	0.77019	0.89015
422	0.24485	0.36177	0.41456	0.65567	0.83171	0.88959	0.83163	0.88668	0.84064	0.81633	0.65852	0.59856	0.75444	0.68575	0.77965	0.92142	0.9821	0.97457	0.97747	0.97523	0.94162	0.92313	0.85769	0.76561	0.80556	0.79868	0.84042	0.8439	0.71124	0.78875	0.82818	0.85055	0.81379	0.75772	0.58795	0.44111	0.27342	0.22336	0.08775	0.13566	0.06452	0.11861	0.01504	0.29179	0.68736	0.75059	0.61346	0.74429	0.89197
423	0.12557	0.25077	0.30459	0.56487	0.75271	0.81368	0.74261	0.79898	0.73847	0.71566	0.53341	0.46622	0.64558	0.56566	0.68222	0.86848	0.95486	0.97714	0.97079	0.94876	0.88125	0.84389	0.75674	0.6377	0.68615	0.68197	0.79554	0.80457	0.63456	0.70707	0.77115	0.80311	0.79787	0.75259	0.61394	0.52819	0.34922	0.30398	0.15722	0.1951	0.09729	0.12037	0.09806	0.42104	0.72013	0.81112	0.73022	0.82787	0.90744
424	0.16889	0.25489	0.31476	0.5474	0.72982	0.84635	0.80143	0.84934	0.88731	0.8908	0.796	0.75311	0.86892	0.81868	0.88719	0.96715	0.931	0.8969	0.89816	0.94264	0.9566	0.92804	0.89917	0.81875	0.84461	0.76666	0.6751	0.6764	0.55792	0.66658	0.6923	0.71676	0.62836	0.54073	0.322	0.16395	0.02103	0.0691	0.20524	0.15917	0.22441	0.36794	0.27271	0.06688	0.50707	0.59695	0.49962	0.68589	0.88593
425	0.16871	0.21642	0.276	0.46675	0.62433	0.77168	0.74971	0.78821	0.90221	0.92883	0.91081	0.89092	0.94581	0.92249	0.94679	0.93767	0.80939	0.73623	0.74322	0.8351	0.90951	0.8895	0.90859	0.8638	0.86954	0.74139	0.50525	0.49937	0.42771	0.54975	0.55029	0.56332	0.41768	0.30965	0.05375	0.13738	0.31114	0.35766	0.47106	0.42405	0.46179	0.53741	0.53489	0.21347	0.27871	0.36584	0.27507	0.50952	0.77772
426	0.13422	0.13608	0.18889	0.32083	0.43836	0.60561	0.60591	0.63094	0.81347	0.86175	0.92458	0.93083	0.92009	0.92705	0.90597	0.81153	0.60041	0.49833	0.50773	0.63711	0.76314	0.74984	0.81369	0.80603	0.79225	0.62127	0.2641	0.25402	0.23306	0.36123	0.33555	0.33961	0.15514	0.03339	0.23409	0.43223	0.57893	0.61792	0.69968	0.65708	0.66624	0.6692	0.74725	0.47146	0.01374	0.09349	0.02851	0.28731	0.59125
427	0.13664	0.13882	0.18971	0.32038	0.44055	0.60688	0.60775	0.63102	0.81004	0.85684	0.91763	0.92413	0.91572	0.92289	0.90439	0.81263	0.60483	0.50415	0.51289	0.63989	0.76348	0.74957	0.81107	0.80243	0.78975	0.61951	0.26532	0.25719	0.23889	0.36833	0.33746	0.34494	0.16579	0.04408	0.22248	0.42075	0.56628	0.60489	0.68711	0.64529	0.6546	0.66059	0.73857	0.46104	0.0228	0.09821	0.03332	0.29152	0.59207
428	0.12473	0.07056	0.10382	0.13643	0.18542	0.34319	0.37309	0.37832	0.61064	0.67309	0.82447	0.86213	0.77212	0.81622	0.74106	0.55381	0.27856	0.15156	0.16466	0.31884	0.49236	0.49447	0.6035	0.64824	0.61442	0.42472	0.03335	0.04615	0.01182	0.12762	0.06076	0.05522	0.15029	0.2712	0.51773	0.71533	0.80012	0.82547	0.85339	0.81861	0.7848	0.69837	0.90047	0.72655	0.29768	0.2553	0.29927	0.0441	0.27229
429	0.17241	0.08671	0.10136	0.05237	0.04331	0.16344	0.2183	0.21147	0.44587	0.50539	0.7041	0.75976	0.61944	0.68698	0.5754	0.33402	0.04835	0.09204	0.07402	0.08063	0.27794	0.30166	0.43431	0.52348	0.47618	0.3071	0.18545	0.20024	0.07617	0.01433	0.08308	0.09825	0.30139	0.41177	0.62674	0.83436	0.85726	0.87316	0.85357	0.82344	0.74933	0.60055	0.92808	0.85863	0.47228	0.48089	0.54126	0.30983	0.00821
430	0.39162	0.36242	0.38048	0.39817	0.44104	0.52054	0.55433	0.57148	0.72135	0.74457	0.85079	0.87677	0.81215	0.84856	0.78195	0.62165	0.43159	0.29853	0.32175	0.43948	0.59987	0.63455	0.72003	0.78442	0.7599	0.65243	0.25165	0.24258	0.33643	0.43026	0.32974	0.33149	0.15122	0.03997	0.20604	0.48964	0.53859	0.57204	0.58688	0.53448	0.47399	0.40595	0.76988	0.63737	0.1068	0.14715	0.31885	0.076	0.28092
431	0.57542	0.53956	0.51204	0.42791	0.40117	0.35603	0.40594	0.41656	0.45836	0.43383	0.52	0.54911	0.47613	0.51855	0.44264	0.29962	0.22821	0.11331	0.14258	0.19553	0.32284	0.39551	0.45845	0.56485	0.5474	0.55927	0.27858	0.27933	0.45803	0.48664	0.34157	0.35047	0.24747	0.18285	0.03398	0.26594	0.20429	0.22673	0.1801	0.12718	0.01847	0.07415	0.46965	0.51186	0.0755	0.23861	0.49479	0.34989	0.05277
432	0.47689	0.51453	0.51048	0.57997	0.64984	0.62818	0.61821	0.65849	0.63471	0.59361	0.5483	0.53326	0.58586	0.57286	0.58703	0.60931	0.6347	0.58166	0.59212	0.59735	0.63249	0.66089	0.64476	0.65103	0.67435	0.69927	0.60515	0.62365	0.66245	0.71139	0.63622	0.67419	0.62579	0.56061	0.40667	0.1627	0.12812	0.09173	0.04582	0.1053	0.12699	0.05545	0.20322	0.08075	0.3301	0.25335	0.04396	0.17327	0.39259
433	0.21464	0.32542	0.31671	0.44666	0.54232	0.4501	0.38978	0.43342	0.23186	0.15118	0.05928	0.12171	0.05394	0.02018	0.09604	0.33297	0.58275	0.659	0.64783	0.52563	0.38904	0.38103	0.25275	0.16698	0.2278	0.36509	0.68753	0.71925	0.62996	0.61311	0.6391	0.69308	0.81075	0.83609	0.86414	0.83395	0.79678	0.77626	0.69795	0.72853	0.66953	0.46176	0.56578	0.65716	0.69948	0.6701	0.56162	0.49424	0.4209
434	0.17403	0.2965	0.32562	0.54211	0.70071	0.69939	0.62881	0.68136	0.55722	0.50756	0.30824	0.24238	0.43003	0.3511	0.4735	0.68963	0.84819	0.89544	0.88463	0.81771	0.71962	0.69185	0.58145	0.47075	0.52432	0.57253	0.77273	0.7955	0.65597	0.70325	0.74212	0.79553	0.84115	0.81936	0.74125	0.67457	0.54783	0.51313	0.38695	0.42729	0.3416	0.11635	0.28948	0.53237	0.73652	0.7778	0.68363	0.71786	0.73836
435	0.16549	0.25802	0.31012	0.5467	0.71796	0.80543	0.74507	0.79911	0.80458	0.79625	0.67993	0.63416	0.77078	0.7155	0.79918	0.91557	0.92215	0.91062	0.90425	0.92175	0.90789	0.8742	0.82254	0.72807	0.76192	0.70428	0.68024	0.69353	0.56214	0.66739	0.6898	0.73086	0.67198	0.59455	0.40434	0.27347	0.09709	0.05244	0.08765	0.03753	0.11641	0.29428	0.16641	0.16529	0.5327	0.62061	0.54569	0.70073	0.85543
436	0.09333	0.20628	0.24912	0.49704	0.67081	0.72735	0.64783	0.70429	0.64986	0.62393	0.45566	0.39537	0.57172	0.498	0.61462	0.8062	0.89079	0.92456	0.9086	0.8793	0.80645	0.75994	0.66889	0.54485	0.59674	0.58173	0.69988	0.72311	0.55614	0.63501	0.68327	0.73548	0.73823	0.68895	0.56239	0.49929	0.33101	0.29335	0.14445	0.18694	0.08162	0.14638	0.09383	0.40654	0.63666	0.73467	0.69835	0.78435	0.83842
437	0.05291	0.07926	0.10991	0.34846	0.50908	0.51813	0.42495	0.47576	0.33782	0.29439	0.06734	0.00696	0.20618	0.11282	0.26435	0.53975	0.72821	0.82432	0.79836	0.70556	0.55546	0.49654	0.35951	0.20741	0.27299	0.32018	0.63322	0.66292	0.45998	0.49246	0.58094	0.6381	0.7313	0.73186	0.71809	0.77106	0.63082	0.60641	0.46465	0.48561	0.35718	0.09101	0.47465	0.72373	0.729	0.83097	0.85126	0.82334	0.7186
438	0.06334	0.06884	0.11105	0.36963	0.54743	0.58475	0.48944	0.5462	0.4395	0.40942	0.19424	0.12204	0.33172	0.23963	0.38831	0.64696	0.79729	0.87902	0.85462	0.78462	0.65325	0.59003	0.46366	0.30911	0.36913	0.3843	0.6436	0.669	0.45491	0.50738	0.59694	0.65117	0.71885	0.70336	0.6534	0.69067	0.52503	0.49496	0.34289	0.36531	0.23276	0.02956	0.35997	0.65476	0.72148	0.8418	0.86333	0.87233	0.80482
439	0.02073	0.11633	0.13659	0.34621	0.49315	0.46301	0.379	0.42677	0.24628	0.18975	0.05158	0.12681	0.08587	0.00895	0.14135	0.42567	0.66115	0.76475	0.744	0.62691	0.46251	0.41761	0.27177	0.13356	0.19741	0.2887	0.65352	0.68105	0.50096	0.50586	0.58953	0.64214	0.76621	0.78714	0.81155	0.86684	0.7614	0.73959	0.62106	0.63659	0.52506	0.27244	0.60554	0.795	0.77105	0.83293	0.81706	0.75051	0.61884
440	0.0671	0.06895	0.08845	0.29244	0.44016	0.40876	0.32565	0.37176	0.18286	0.12906	0.11771	0.19409	0.02068	0.07576	0.07836	0.3679	0.61418	0.72534	0.70412	0.58143	0.40695	0.35972	0.21006	0.07037	0.13317	0.2284	0.61578	0.63978	0.45662	0.45504	0.54375	0.59638	0.73996	0.7693	0.81139	0.88964	0.78675	0.76815	0.65455	0.66113	0.54799	0.3018	0.66276	0.84033	0.78217	0.84443	0.83856	0.75437	0.59468
441	0.23838	0.14122	0.15585	0.06406	0.00232	0.08736	0.15264	0.12933	0.34883	0.40396	0.61844	0.67698	0.50615	0.58511	0.44975	0.16865	0.11493	0.26442	0.23575	0.07561	0.12932	0.17518	0.32563	0.43946	0.38405	0.24576	0.23675	0.26462	0.12496	0.0613	0.14829	0.19326	0.41367	0.49422	0.67185	0.86979	0.85794	0.86641	0.81703	0.79156	0.69755	0.50259	0.88645	0.89789	0.54972	0.57854	0.65794	0.45299	0.14241
442	0.22318	0.16202	0.19997	0.2032	0.2017	0.33284	0.36982	0.36418	0.5871	0.64445	0.81039	0.85008	0.73508	0.79022	0.69203	0.46663	0.18603	0.04476	0.06732	0.23114	0.41867	0.44266	0.56917	0.636	0.59488	0.43014	0.03503	0.05779	0.01479	0.11131	0.05241	0.01752	0.21473	0.31635	0.54851	0.75765	0.81846	0.8403	0.84857	0.81201	0.76064	0.63825	0.90642	0.792	0.36004	0.33331	0.40581	0.15824	0.17474
443	0.07165	0.0659	0.13332	0.26399	0.35473	0.53699	0.53451	0.54707	0.74854	0.81064	0.88911	0.89733	0.87028	0.88378	0.85261	0.73482	0.49349	0.3917	0.40178	0.54828	0.67902	0.66305	0.74066	0.72962	0.70943	0.52263	0.16087	0.14185	0.09792	0.22626	0.22643	0.2069	0.00101	0.10896	0.36111	0.51568	0.66978	0.70282	0.78232	0.74855	0.76736	0.75284	0.77366	0.50672	0.07715	0.03591	0.01452	0.26781	0.55149
444	0.15957	0.19942	0.13462	0.04536	0.000969	0.19407	0.19034	0.18822	0.42308	0.50936	0.62914	0.65212	0.5893	0.61603	0.57226	0.43231	0.15746	0.07772	0.07741	0.22972	0.35233	0.31855	0.4095	0.39708	0.36816	0.15393	0.18991	0.21136	0.27016	0.1565	0.13181	0.16144	0.35056	0.43593	0.62049	0.66026	0.79489	0.81081	0.86556	0.8584	0.88879	0.84277	0.74691	0.53176	0.30799	0.15756	0.05661	0.1449	0.32953
445	0.13123	0.13124	0.05448	0.1102	0.20647	0.41013	0.37764	0.39259	0.59484	0.66843	0.72212	0.72308	0.72235	0.72142	0.71797	0.65294	0.42439	0.36363	0.35878	0.49245	0.57981	0.53176	0.58705	0.53149	0.52282	0.31754	0.04209	0.02867	0.0873	0.04111	0.09146	0.07653	0.09614	0.18903	0.39702	0.44612	0.62779	0.65533	0.75617	0.74039	0.80523	0.83625	0.65129	0.3487	0.07487	0.10232	0.19001	0.40228	0.58244
446	0.04925	0.03348	0.11727	0.38327	0.56097	0.72639	0.66179	0.70024	0.77557	0.80685	0.71701	0.67245	0.78945	0.73574	0.81219	0.89885	0.82372	0.81097	0.80311	0.86499	0.86464	0.80788	0.7821	0.66649	0.68969	0.56373	0.49548	0.49038	0.29855	0.42193	0.50283	0.51124	0.41163	0.33602	0.14143	0.08874	0.13632	0.17701	0.33334	0.30463	0.41286	0.5679	0.2725	0.10777	0.41979	0.59598	0.61619	0.78917	0.91932
447	0.26893	0.15606	0.07856	0.20774	0.38902	0.51572	0.42131	0.46058	0.44459	0.46103	0.28958	0.22314	0.40068	0.31643	0.44828	0.65295	0.69705	0.76446	0.7404	0.73024	0.62926	0.54532	0.45709	0.28991	0.33291	0.26526	0.43826	0.44123	0.17581	0.25723	0.39598	0.41476	0.42422	0.4042	0.33141	0.43108	0.21268	0.1856	0.02082	0.02378	0.13201	0.35472	0.17482	0.52351	0.5697	0.77629	0.88741	0.93384	0.86796
448	0.45243	0.35287	0.29958	0.06835	0.06104	0.13417	0.02664	0.05931	0.01012	0.00151	0.18685	0.2502	0.07187	0.15768	0.01291	0.24022	0.35485	0.48051	0.44238	0.37926	0.21681	0.12007	0.00333	0.17455	0.12318	0.14463	0.18628	0.1989	0.07818	0.04784	0.11423	0.13852	0.23794	0.26967	0.32673	0.56223	0.39912	0.39198	0.25833	0.23461	0.06557	0.16274	0.48317	0.72487	0.48038	0.68457	0.89383	0.81813	0.57998
449	0.2888	0.16998	0.10296	0.18113	0.35893	0.45999	0.35633	0.40031	0.35175	0.3567	0.16226	0.09211	0.28778	0.19662	0.34414	0.58693	0.67433	0.76417	0.73377	0.69608	0.56635	0.47753	0.36791	0.18974	0.2426	0.19951	0.44258	0.45436	0.18098	0.24795	0.3896	0.42004	0.46632	0.45921	0.42098	0.54794	0.34184	0.31641	0.15133	0.15358	0.01118	0.26122	0.30125	0.63262	0.60769	0.8084	0.93597	0.94603	0.83055
450	0.26229	0.13423	0.07263	0.20675	0.38663	0.46657	0.36696	0.40923	0.32747	0.32101	0.1066	0.03107	0.23832	0.14235	0.29751	0.55841	0.68257	0.78058	0.75121	0.69476	0.55008	0.46723	0.34573	0.16928	0.22443	0.20983	0.49561	0.50828	0.24156	0.29421	0.43515	0.46641	0.53427	0.53757	0.51754	0.64289	0.44928	0.42475	0.26384	0.2656	0.10672	0.1485	0.40058	0.71002	0.67468	0.85645	0.95997	0.94792	0.81601
451	0.36874	0.25002	0.20959	0.01613	0.15303	0.18262	0.08039	0.11609	0.0143	0.02998	0.25335	0.32628	0.12312	0.21835	0.05763	0.23115	0.41438	0.55176	0.51543	0.4173	0.23001	0.14495	0.00427	0.17062	0.11206	0.08112	0.31995	0.33776	0.07622	0.08665	0.23635	0.27113	0.4067	0.45007	0.52902	0.74431	0.60312	0.5952	0.46644	0.44788	0.28885	0.03993	0.64124	0.85416	0.61411	0.77689	0.93367	0.82757	0.57378
452	0.36699	0.24931	0.21091	0.01321	0.1488	0.17699	0.07343	0.10974	0.02077	0.03701	0.26062	0.33307	0.12913	0.22463	0.0629	0.22812	0.41219	0.55059	0.51379	0.4144	0.22587	0.13944	0.00256	0.17861	0.11826	0.0875	0.31563	0.33527	0.07267	0.08359	0.23246	0.26997	0.40842	0.4511	0.53116	0.74747	0.60714	0.59934	0.47017	0.45247	0.29149	0.03898	0.64173	0.85535	0.61082	0.77274	0.93326	0.82621	0.56974
453	0.31157	0.18521	0.13403	0.12413	0.28873	0.34459	0.24313	0.28405	0.17563	0.1634	0.06094	0.13654	0.07468	0.0232	0.13831	0.42055	0.5778	0.69649	0.66306	0.58361	0.4154	0.32946	0.19469	0.0156	0.0745	0.08185	0.42777	0.44517	0.17782	0.21246	0.35826	0.39481	0.49941	0.51935	0.54465	0.71103	0.53922	0.52152	0.37237	0.36586	0.20403	0.05698	0.52286	0.79506	0.66525	0.83772	0.96704	0.91077	0.719
454	0.31893	0.19263	0.15153	0.08066	0.22709	0.2522	0.15439	0.19142	0.05043	0.02891	0.20485	0.28108	0.06992	0.16822	0.00543	0.28921	0.4831	0.61606	0.58229	0.48101	0.29487	0.21461	0.07043	0.10261	0.04298	0.0036	0.39628	0.41458	0.15908	0.17061	0.31519	0.35069	0.48596	0.52531	0.59255	0.78232	0.63902	0.62762	0.49555	0.48256	0.32762	0.07266	0.64541	0.86633	0.66919	0.82026	0.94801	0.85013	0.61546
455	0.32075	0.20036	0.17285	0.02483	0.14569	0.13853	0.04364	0.07704	0.09033	0.12056	0.35547	0.42913	0.22431	0.32002	0.15946	0.14078	0.36467	0.50975	0.47556	0.35477	0.15445	0.07988	0.07052	0.23451	0.17341	0.10497	0.33947	0.36028	0.12128	0.10991	0.24843	0.28552	0.45015	0.50726	0.61673	0.829	0.71866	0.71396	0.6018	0.5829	0.4367	0.19083	0.74725	0.91184	0.64217	0.76915	0.90069	0.76277	0.48661
456	0.31773	0.19339	0.15808	0.06452	0.20256	0.21681	0.11639	0.15446	0.00655	0.01822	0.25258	0.3277	0.11695	0.21502	0.05126	0.24829	0.45174	0.5894	0.55447	0.44618	0.25441	0.17422	0.02636	0.14609	0.08396	0.03671	0.37849	0.39981	0.1471	0.15347	0.29604	0.33481	0.48062	0.52341	0.60308	0.79982	0.66587	0.65607	0.52805	0.51433	0.3595	0.10119	0.67175	0.87935	0.65719	0.80185	0.93544	0.82629	0.57764
457	0.31724	0.19073	0.14836	0.08976	0.24106	0.27221	0.17234	0.21136	0.07731	0.05741	0.17496	0.25085	0.03829	0.137	0.02668	0.32149	0.50847	0.63911	0.6046	0.50667	0.3235	0.24112	0.09737	0.07808	0.01779	0.0143	0.4037	0.42326	0.16461	0.18276	0.32797	0.36584	0.49654	0.52945	0.58706	0.77115	0.62143	0.60831	0.47158	0.46038	0.30325	0.04349	0.61875	0.85306	0.66982	0.82484	0.95461	0.86621	0.63953
458	0.30689	0.18197	0.14893	0.06274	0.19609	0.19874	0.1035	0.13919	0.02228	0.05078	0.2888	0.36439	0.15454	0.25225	0.08976	0.21105	0.4278	0.56762	0.53399	0.41867	0.22332	0.14797	0.00188	0.16866	0.10828	0.0477	0.38125	0.40115	0.15768	0.15611	0.29619	0.33335	0.48819	0.53693	0.62798	0.82529	0.70244	0.69422	0.57438	0.55838	0.41061	0.15987	0.7148	0.90233	0.67094	0.80253	0.92413	0.8026	0.54555
459	0.29271	0.16961	0.14256	0.05603	0.17846	0.16583	0.07118	0.1067	0.06643	0.09968	0.3391	0.41391	0.20567	0.30224	0.14085	0.16217	0.39228	0.53569	0.50248	0.37925	0.17886	0.10684	0.046	0.20858	0.14694	0.07317	0.37221	0.39369	0.15798	0.1473	0.28305	0.32167	0.48779	0.54251	0.64795	0.84824	0.73874	0.73271	0.62029	0.60331	0.4591	0.21041	0.75153	0.91775	0.6658	0.78539	0.90325	0.76812	0.49964
460	0.32009	0.20807	0.19233	0.0307	0.06496	0.02911	0.0603	0.03028	0.21649	0.25261	0.48245	0.55183	0.35789	0.44837	0.29411	0.00365	0.24791	0.40044	0.36671	0.23161	0.02351	0.04458	0.19724	0.34874	0.28889	0.19724	0.27489	0.29709	0.07799	0.04657	0.17775	0.21578	0.40364	0.47393	0.61858	0.84671	0.76816	0.76995	0.67899	0.65373	0.51891	0.28748	0.81878	0.93024	0.60096	0.70393	0.83742	0.66715	0.35962
461	0.322	0.21185	0.19704	0.04473	0.04601	0.00507	0.07948	0.05332	0.24484	0.28178	0.50974	0.57813	0.38827	0.47682	0.32554	0.03161	0.21635	0.3696	0.33665	0.19925	0.00914	0.07412	0.2256	0.37228	0.31501	0.21746	0.25899	0.27988	0.06796	0.03101	0.16134	0.19657	0.38746	0.46243	0.61506	0.84629	0.77569	0.77957	0.69515	0.66791	0.53858	0.3156	0.83752	0.93256	0.59225	0.68891	0.81899	0.64065	0.32729
462	0.30841	0.20452	0.19562	0.06943	0.00258	0.05628	0.13315	0.11237	0.31532	0.35643	0.57722	0.64202	0.46408	0.54778	0.40553	0.12199	0.13592	0.29007	0.25929	0.11597	0.09209	0.14895	0.29697	0.43101	0.37743	0.26414	0.22164	0.24129	0.04834	0.00283	0.12188	0.1519	0.34954	0.43462	0.60737	0.84316	0.79547	0.80393	0.73577	0.70476	0.58783	0.38259	0.87239	0.92553	0.55797	0.63617	0.75854	0.56188	0.23715
463	0.31225	0.19348	0.16795	0.00844	0.11893	0.09654	0.01247	0.03934	0.14385	0.1781	0.4112	0.48353	0.28763	0.37937	0.22622	0.06554	0.30197	0.44764	0.41638	0.28988	0.08847	0.02355	0.12477	0.27537	0.2195	0.13298	0.32299	0.33992	0.11703	0.0912	0.22696	0.25635	0.43009	0.49815	0.62587	0.83959	0.74836	0.74711	0.65115	0.62723	0.49593	0.26944	0.7981	0.92416	0.63664	0.74509	0.86096	0.70377	0.41752
464	0.33875	0.21958	0.19185	0.00772	0.10845	0.09581	0.01123	0.03867	0.13643	0.16711	0.39807	0.46993	0.27355	0.36584	0.21141	0.0792	0.30821	0.45362	0.4215	0.29876	0.09897	0.03046	0.11652	0.27054	0.21507	0.13701	0.312	0.32849	0.10126	0.07883	0.21699	0.24803	0.41739	0.48295	0.60542	0.82321	0.72509	0.72298	0.62326	0.59914	0.46551	0.23852	0.78258	0.91906	0.63178	0.74923	0.87317	0.72037	0.43529
465	0.32813	0.21129	0.18925	0.02063	0.08325	0.05659	0.02593	0.000406	0.18596	0.22061	0.45119	0.52195	0.3287	0.41953	0.26685	0.02445	0.2653	0.41418	0.38214	0.25209	0.04804	0.01766	0.16661	0.31636	0.26035	0.17006	0.29334	0.31199	0.09475	0.06391	0.19809	0.22813	0.40633	0.47825	0.61537	0.83739	0.75384	0.75477	0.66322	0.63753	0.50777	0.28341	0.81168	0.92533	0.61424	0.72054	0.84386	0.67775	0.38057
466	0.36219	0.26413	0.25397	0.13017	0.06016	0.10794	0.18285	0.16578	0.35642	0.39148	0.60191	0.66342	0.49316	0.57376	0.43406	0.15781	0.0866	0.24195	0.20897	0.07099	0.13488	0.19575	0.33892	0.47337	0.42188	0.32038	0.15681	0.17551	0.01982	0.06819	0.06064	0.08902	0.28545	0.37115	0.5493	0.80228	0.75322	0.76267	0.69695	0.66229	0.54533	0.3488	0.86023	0.91207	0.51815	0.60546	0.74906	0.54912	0.21319
467	0.42535	0.32213	0.30079	0.13772	0.03581	0.04477	0.12687	0.10303	0.26321	0.28532	0.49742	0.56185	0.38042	0.46666	0.31682	0.03544	0.17981	0.33267	0.29664	0.17455	0.02698	0.10221	0.24441	0.39682	0.34437	0.27916	0.16994	0.18929	0.03424	0.0609	0.07745	0.11237	0.29279	0.36219	0.50862	0.7643	0.6781	0.6837	0.59406	0.5588	0.42352	0.20937	0.78493	0.90045	0.5411	0.66486	0.83192	0.66253	0.34182
468	0.40127	0.3121	0.3057	0.19685	0.13652	0.18312	0.25525	0.23947	0.41998	0.44935	0.64712	0.70425	0.54472	0.62159	0.48769	0.22188	0.01335	0.16993	0.13618	0.000409	0.20312	0.26571	0.40335	0.53388	0.48509	0.38977	0.08126	0.0991	0.09034	0.14239	0.01586	0.01325	0.21194	0.30033	0.48815	0.7579	0.71704	0.73119	0.67346	0.63305	0.51777	0.33664	0.85406	0.89015	0.46482	0.55491	0.71555	0.50792	0.15866
469	0.44424	0.36408	0.35861	0.25965	0.20454	0.24413	0.31316	0.30139	0.46842	0.49107	0.67531	0.72816	0.57943	0.65183	0.5239	0.26978	0.04912	0.10732	0.07265	0.057	0.25636	0.32153	0.45271	0.5801	0.53365	0.44763	0.01097	0.02646	0.15898	0.2127	0.08684	0.05934	0.13897	0.22845	0.42119	0.70533	0.66807	0.68493	0.63393	0.58932	0.47461	0.306	0.83416	0.86193	0.41046	0.50558	0.68555	0.47462	0.11643
470	0.47478	0.41388	0.41465	0.35516	0.33073	0.37906	0.43728	0.43385	0.59079	0.60831	0.76344	0.80567	0.68517	0.74472	0.63563	0.41113	0.20453	0.05106	0.08507	0.21104	0.4001	0.4597	0.5766	0.68473	0.64706	0.56075	0.11957	0.10654	0.26432	0.33002	0.21538	0.19491	0.00573	0.1037	0.31888	0.61789	0.60845	0.63261	0.60611	0.55437	0.45521	0.3221	0.81686	0.79339	0.29241	0.37566	0.56883	0.34125	0.03046
471	0.4997	0.41389	0.39576	0.26535	0.19046	0.19906	0.27356	0.25792	0.40273	0.41481	0.59971	0.65475	0.49884	0.57461	0.44164	0.18552	0.0132	0.16775	0.13064	0.0135	0.18161	0.25693	0.38584	0.52561	0.4815	0.422	0.01638	0.03075	0.17756	0.21504	0.07808	0.05174	0.13252	0.21163	0.38229	0.67005	0.60411	0.61771	0.54993	0.50512	0.37775	0.19857	0.77545	0.8473	0.41787	0.54498	0.74321	0.55333	0.20681
472	0.52489	0.43037	0.40003	0.22735	0.1204	0.09486	0.1783	0.15623	0.27697	0.28033	0.47128	0.53065	0.36052	0.44214	0.29822	0.03448	0.13925	0.28888	0.24965	0.1478	0.04207	0.12897	0.25883	0.4159	0.36923	0.34005	0.07042	0.08474	0.1516	0.16577	0.01867	0.01166	0.17776	0.23928	0.37295	0.65163	0.54742	0.5536	0.46095	0.42099	0.27669	0.07598	0.70178	0.84093	0.46483	0.62146	0.83037	0.67466	0.35374
473	0.59277	0.51162	0.47973	0.31481	0.21449	0.17188	0.25397	0.23502	0.32699	0.31761	0.48554	0.53819	0.38432	0.45851	0.32331	0.07926	0.06387	0.21045	0.16948	0.08087	0.09901	0.19191	0.31065	0.46557	0.42383	0.41752	0.03641	0.02416	0.2594	0.26722	0.11989	0.0927	0.06583	0.12407	0.25833	0.55673	0.45109	0.4608	0.37307	0.32703	0.18087	0.00228	0.64277	0.78138	0.37939	0.55062	0.79108	0.63948	0.31278
474	0.59962	0.52142	0.48978	0.33128	0.23734	0.19766	0.27672	0.25946	0.35102	0.34022	0.5033	0.55407	0.40571	0.47761	0.34586	0.10837	0.03322	0.17875	0.13895	0.05085	0.12702	0.21818	0.33442	0.48536	0.44691	0.43994	0.06049	0.04977	0.2824	0.29195	0.14466	0.12022	0.03801	0.09842	0.23846	0.54128	0.44116	0.45257	0.37003	0.32127	0.17838	0.00286	0.64086	0.76893	0.35863	0.5278	0.76912	0.61385	0.28422
475	0.56512	0.47382	0.43524	0.2492	0.13329	0.0844	0.16935	0.147	0.24072	0.23207	0.411	0.4684	0.30304	0.38246	0.24074	0.01106	0.15388	0.297	0.25749	0.17173	0.00702	0.10058	0.22258	0.38437	0.34207	0.33957	0.03728	0.0482	0.20105	0.2	0.04669	0.01994	0.12768	0.17946	0.29514	0.57871	0.45697	0.46284	0.36293	0.32015	0.16844	0.02896	0.62129	0.78885	0.43003	0.60893	0.83634	0.70148	0.39457
476	0.58381	0.49335	0.44938	0.24882	0.12269	0.05303	0.14149	0.11876	0.19127	0.17594	0.3484	0.40527	0.23963	0.31866	0.17649	0.07081	0.19083	0.32911	0.28773	0.21404	0.04285	0.05714	0.17457	0.34266	0.29978	0.31776	0.03215	0.04339	0.21464	0.20074	0.04476	0.01735	0.11591	0.15806	0.25392	0.5339	0.39511	0.39918	0.28869	0.24841	0.08948	0.11287	0.55727	0.75435	0.41528	0.61137	0.8525	0.73776	0.44584
477	0.63075	0.55208	0.50562	0.31293	0.1946	0.1121	0.19612	0.17739	0.22692	0.20158	0.35318	0.40372	0.25427	0.32613	0.19525	0.03143	0.12615	0.25939	0.21806	0.15644	0.00329	0.10564	0.2116	0.37437	0.33773	0.37303	0.05213	0.0434	0.29706	0.27911	0.12373	0.10118	0.02381	0.06343	0.15847	0.44989	0.31193	0.31897	0.21399	0.16951	0.01279	0.17031	0.50265	0.69501	0.34382	0.54707	0.80666	0.69706	0.40603
478	0.62663	0.54654	0.49592	0.29848	0.17645	0.08842	0.17121	0.15184	0.19622	0.1685	0.31808	0.3691	0.22086	0.29283	0.16408	0.0581	0.14524	0.27457	0.23473	0.17818	0.0238	0.07844	0.18123	0.34396	0.30948	0.35043	0.04184	0.03506	0.29248	0.2704	0.11311	0.09193	0.02131	0.05835	0.14445	0.43085	0.28727	0.29312	0.18572	0.14214	0.01447	0.1968	0.47435	0.67582	0.34202	0.55007	0.80676	0.70658	0.42725
479	0.58489	0.49402	0.43626	0.20896	0.06431	0.03959	0.05176	0.02463	0.06068	0.03287	0.19261	0.2487	0.08579	0.16354	0.02591	0.20516	0.28232	0.40464	0.3641	0.31544	0.1661	0.06023	0.04507	0.21849	0.17922	0.23309	0.05488	0.06314	0.20881	0.16921	0.00893	0.01714	0.11191	0.13362	0.18402	0.44198	0.27266	0.27062	0.14347	0.10916	0.05605	0.25995	0.41732	0.66829	0.40146	0.62203	0.86589	0.79706	0.55197
480	0.50391	0.40187	0.33966	0.10512	0.04508	0.13844	0.05304	0.08009	0.02309	0.04195	0.13422	0.19642	0.02432	0.10597	0.03285	0.26957	0.36435	0.48147	0.44485	0.39223	0.24363	0.14815	0.0396	0.12966	0.09115	0.12767	0.16705	0.17223	0.09598	0.05944	0.10142	0.11947	0.21018	0.23181	0.27221	0.50086	0.33007	0.32294	0.19267	0.16341	0.00855	0.19873	0.44406	0.69735	0.48316	0.68876	0.88944	0.82603	0.60321
481	0.20071	0.06315	0.00028	0.27181	0.45857	0.52539	0.44087	0.48035	0.37806	0.36513	0.1421	0.06322	0.2709	0.17516	0.32594	0.58011	0.72001	0.81009	0.78755	0.72721	0.5873	0.51873	0.39804	0.23541	0.28527	0.29079	0.57408	0.5802	0.33055	0.37615	0.50939	0.53484	0.60273	0.60636	0.58037	0.67634	0.49191	0.46569	0.31374	0.31525	0.17581	0.06434	0.4292	0.72449	0.73934	0.89444	0.94697	0.93535	0.82532
482	0.17987	0.03792	0.00546	0.24057	0.39677	0.4048	0.31936	0.35542	0.19143	0.15765	0.0901	0.17244	0.04435	0.05455	0.10539	0.39119	0.60179	0.71759	0.69369	0.59227	0.41623	0.35607	0.21289	0.05449	0.11202	0.17652	0.56261	0.57482	0.33907	0.34665	0.47568	0.50654	0.62693	0.66322	0.70494	0.8328	0.69353	0.67622	0.54539	0.54153	0.40767	0.15987	0.64148	0.85964	0.76775	0.88711	0.93446	0.85539	0.67598
483	0.20752	0.06728	0.0244	0.21565	0.37589	0.39196	0.30135	0.3402	0.18389	0.15285	0.09291	0.17475	0.04357	0.05649	0.10626	0.39589	0.60102	0.71952	0.69309	0.59304	0.41565	0.34897	0.20462	0.0404	0.10103	0.15742	0.54199	0.55621	0.31501	0.32675	0.45729	0.49122	0.61208	0.64702	0.68687	0.82303	0.67796	0.66021	0.52588	0.52247	0.38119	0.12708	0.62947	0.85885	0.75621	0.88406	0.94822	0.87128	0.68629
484	0.22292	0.08489	0.04075	0.20435	0.36691	0.39005	0.29659	0.33654	0.1885	0.16013	0.08316	0.16424	0.05439	0.04594	0.11698	0.40763	0.60597	0.72473	0.69688	0.59963	0.42328	0.35276	0.20892	0.04106	0.10185	0.14955	0.528	0.54383	0.29717	0.31471	0.44757	0.48265	0.60143	0.63255	0.66877	0.80876	0.65817	0.64078	0.50236	0.49854	0.35224	0.09457	0.6099	0.84978	0.74645	0.88185	0.95626	0.88454	0.69907
485	0.24274	0.10826	0.07391	0.14824	0.29127	0.28987	0.1966	0.23422	0.06529	0.03077	0.21531	0.2945	0.07866	0.17802	0.01419	0.28575	0.50868	0.64008	0.61059	0.49659	0.30583	0.23724	0.08641	0.07748	0.01591	0.05277	0.47344	0.49172	0.25338	0.2536	0.38623	0.42265	0.56753	0.61296	0.68631	0.85232	0.72534	0.71354	0.58956	0.57946	0.43638	0.18189	0.69872	0.89646	0.7252	0.8467	0.93132	0.82495	0.59928
486	0.27356	0.14252	0.10851	0.11301	0.25488	0.2571	0.16236	0.19988	0.03661	0.00559	0.23724	0.31499	0.10062	0.19944	0.03533	0.26548	0.48388	0.61834	0.5872	0.47348	0.28136	0.20899	0.05808	0.10821	0.04686	0.01604	0.43812	0.45708	0.21512	0.21607	0.35116	0.38856	0.53763	0.5826	0.66083	0.8394	0.71196	0.70137	0.57727	0.56507	0.41803	0.16368	0.69812	0.89618	0.70435	0.83229	0.93251	0.82246	0.58631
487	0.26516	0.13289	0.09449	0.13964	0.29031	0.30465	0.20734	0.24727	0.09574	0.06784	0.17369	0.25204	0.03547	0.13534	0.02933	0.32777	0.53384	0.66274	0.6317	0.52609	0.34014	0.26541	0.11725	0.05294	0.00868	0.05922	0.46146	0.48039	0.23227	0.2438	0.37978	0.41788	0.55405	0.59127	0.65181	0.81935	0.67899	0.66539	0.53306	0.52397	0.37276	0.11378	0.65185	0.87365	0.71283	0.84937	0.9481	0.8557	0.63762
488	0.21882	0.0817	0.03682	0.21452	0.37983	0.40783	0.31125	0.35353	0.21357	0.18684	0.05421	0.13423	0.08488	0.01579	0.1476	0.43801	0.6283	0.74444	0.71624	0.62279	0.44997	0.37753	0.23491	0.06462	0.12582	0.16524	0.53307	0.55005	0.30072	0.32458	0.45779	0.49505	0.60839	0.63344	0.66143	0.79664	0.64016	0.62065	0.47845	0.47633	0.32665	0.06492	0.58137	0.83314	0.74337	0.88339	0.959	0.89638	0.71955
489	0.22044	0.08562	0.03112	0.24097	0.42228	0.4805	0.38321	0.42882	0.32236	0.30632	0.07826	0.000172	0.21569	0.11676	0.27619	0.55052	0.70238	0.80398	0.77628	0.70471	0.55173	0.47456	0.34312	0.16991	0.22789	0.23539	0.54645	0.56184	0.30646	0.35087	0.48463	0.52097	0.60305	0.61	0.59869	0.71231	0.53123	0.50646	0.35146	0.35427	0.20067	0.06116	0.45799	0.75324	0.72429	0.88385	0.96232	0.93868	0.80301
490	0.20225	0.07028	0.00792	0.2775	0.47294	0.55558	0.46187	0.5093	0.43188	0.42434	0.21086	0.13523	0.34324	0.24744	0.39929	0.65126	0.76851	0.85268	0.8277	0.77722	0.6468	0.57021	0.45243	0.28319	0.33637	0.31872	0.56962	0.58108	0.32876	0.39062	0.51798	0.55187	0.60542	0.59477	0.54532	0.62885	0.4306	0.40165	0.23936	0.24664	0.09692	0.15544	0.341	0.66772	0.71051	0.87862	0.94444	0.95822	0.87003
491	0.12604	0.00536	0.072	0.36105	0.56009	0.65034	0.56057	0.60974	0.54673	0.53971	0.33605	0.26196	0.46292	0.3704	0.51382	0.7445	0.84106	0.90603	0.88606	0.85098	0.74145	0.6724	0.56633	0.40595	0.45621	0.42968	0.63076	0.63993	0.39896	0.4728	0.58813	0.61964	0.6464	0.6223	0.53901	0.57871	0.37344	0.33893	0.17394	0.18947	0.04918	0.19472	0.24598	0.58907	0.71255	0.87314	0.9066	0.95375	0.91803
492	0.10263	0.03323	0.09478	0.37596	0.56545	0.63353	0.54022	0.59064	0.50106	0.48535	0.26682	0.18901	0.39741	0.30046	0.44921	0.69677	0.82324	0.89806	0.87841	0.82706	0.70284	0.6376	0.52171	0.3607	0.41425	0.41179	0.65523	0.66589	0.42376	0.4843	0.60385	0.636	0.68252	0.66866	0.6074	0.65535	0.46244	0.42902	0.26864	0.28289	0.14435	0.10581	0.33344	0.65412	0.74997	0.89837	0.92297	0.94675	0.88811
493	0.10544	0.03299	0.0929	0.36981	0.55733	0.61716	0.52553	0.57426	0.47188	0.45266	0.22763	0.14815	0.35964	0.26133	0.41166	0.66531	0.80525	0.88516	0.86593	0.80738	0.67627	0.6128	0.49255	0.33216	0.38615	0.39438	0.65765	0.66729	0.42611	0.47992	0.60113	0.63283	0.68839	0.68204	0.63254	0.68805	0.50164	0.4703	0.31323	0.32548	0.18806	0.06067	0.38084	0.68924	0.76915	0.91082	0.93177	0.94287	0.8705
494	0.07587	0.05675	0.12416	0.41071	0.60717	0.69295	0.60695	0.65496	0.5886	0.57842	0.37518	0.30034	0.49864	0.40699	0.5458	0.76877	0.86489	0.92265	0.90646	0.87399	0.77119	0.70945	0.60719	0.45345	0.50187	0.48099	0.67129	0.67775	0.44333	0.51567	0.62931	0.65734	0.67495	0.65014	0.55829	0.57865	0.376	0.3395	0.17594	0.19566	0.06315	0.17222	0.23538	0.5733	0.73084	0.88132	0.88979	0.94434	0.92785
495	0.05511	0.07323	0.14266	0.43006	0.62646	0.72087	0.63534	0.68469	0.63472	0.62852	0.43681	0.36496	0.55571	0.46754	0.60033	0.80887	0.88511	0.9329	0.91788	0.89682	0.80714	0.74643	0.65269	0.50281	0.54919	0.5158	0.6726	0.67854	0.44808	0.52863	0.63729	0.66421	0.66632	0.63232	0.52292	0.52699	0.31903	0.28015	0.11476	0.13769	0.00812	0.22175	0.16709	0.51592	0.7057	0.85871	0.86286	0.93642	0.94471
496	0.09405	0.0418	0.10565	0.38733	0.57439	0.64459	0.55179	0.60233	0.51674	0.50204	0.28703	0.20965	0.41492	0.31894	0.46443	0.70526	0.82499	0.89639	0.87831	0.83143	0.71186	0.64829	0.53642	0.37724	0.42879	0.42274	0.65673	0.66522	0.42158	0.4846	0.60569	0.63606	0.67272	0.65966	0.5937	0.63879	0.44378	0.41028	0.24892	0.26496	0.12719	0.11721	0.31804	0.63997	0.74618	0.89607	0.91757	0.94644	0.89511
497	0.08974	0.04437	0.11219	0.39807	0.58861	0.6694	0.5807	0.62961	0.55685	0.54579	0.339	0.26311	0.46315	0.37046	0.51099	0.73816	0.84109	0.90373	0.88733	0.85152	0.74249	0.67998	0.57507	0.41913	0.46748	0.45118	0.65825	0.66389	0.42318	0.49271	0.61052	0.63784	0.65913	0.6421	0.56149	0.59564	0.3948	0.36018	0.19747	0.21622	0.08008	0.15634	0.26734	0.59866	0.73224	0.88509	0.90139	0.94523	0.91367
498	0.04546	0.07446	0.15013	0.43838	0.63613	0.75364	0.67534	0.72182	0.70598	0.70943	0.54339	0.4776	0.65065	0.57169	0.68959	0.86324	0.89651	0.92422	0.91255	0.91677	0.85364	0.79527	0.72062	0.58018	0.61954	0.56	0.64956	0.65071	0.42975	0.52519	0.62511	0.64684	0.61502	0.56903	0.42873	0.40967	0.19256	0.1518	0.01443	0.01339	0.11093	0.32003	0.0385	0.4032	0.64597	0.80527	0.80443	0.91155	0.96309
499	0.09062	0.02887	0.10542	0.39704	0.59528	0.71836	0.63783	0.68273	0.66999	0.6764	0.51013	0.44448	0.61873	0.5388	0.65975	0.83868	0.87071	0.90481	0.89064	0.89375	0.82493	0.76103	0.68472	0.53846	0.57821	0.5135	0.61378	0.616	0.38605	0.48092	0.5884	0.61036	0.5832	0.53983	0.4079	0.40867	0.188	0.14894	0.02001	0.00409	0.12686	0.34014	0.05234	0.41946	0.63167	0.80267	0.82347	0.92329	0.95693
500	0.19035	0.06178	0.01141	0.30274	0.49527	0.59925	0.51005	0.55443	0.50487	0.50619	0.31225	0.23988	0.43303	0.34364	0.48328	0.70344	0.78261	0.84904	0.82905	0.80306	0.69488	0.62162	0.52215	0.35941	0.40427	0.36459	0.56211	0.5668	0.31309	0.38737	0.5156	0.53959	0.55775	0.53985	0.46432	0.53185	0.32016	0.28845	0.12305	0.1345	0.01269	0.24593	0.23466	0.57666	0.66604	0.84662	0.90799	0.95099	0.9001
501	0.12534	0.00777	0.07223	0.36378	0.56037	0.68929	0.61032	0.65429	0.64685	0.65804	0.49604	0.43111	0.60169	0.52325	0.64232	0.81584	0.84084	0.87535	0.86166	0.86808	0.80035	0.73492	0.66142	0.51519	0.5511	0.48144	0.57996	0.57917	0.34589	0.44055	0.55193	0.56961	0.53997	0.49887	0.3714	0.38498	0.16231	0.12534	0.04021	0.02051	0.15337	0.36021	0.04689	0.41226	0.60945	0.78811	0.81981	0.9165	0.94375
502	0.23224	0.12409	0.0397	0.24484	0.4333	0.57861	0.50121	0.53956	0.55268	0.57779	0.43261	0.37246	0.53008	0.45576	0.57013	0.73207	0.73402	0.77337	0.75691	0.77177	0.70519	0.63131	0.56596	0.41757	0.44679	0.35796	0.45056	0.44554	0.20313	0.29723	0.42153	0.433	0.40126	0.36615	0.25427	0.30985	0.08471	0.05283	0.10679	0.09808	0.23704	0.42796	0.0328	0.39145	0.52718	0.72874	0.80641	0.89237	0.89094
503	0.01041	0.05915	0.1446	0.38218	0.54853	0.72238	0.68323	0.71314	0.81654	0.85646	0.80668	0.77332	0.85432	0.81671	0.86407	0.89057	0.77139	0.72833	0.73014	0.81767	0.857	0.81643	0.82088	0.73805	0.7424	0.60271	0.44792	0.43289	0.28116	0.40864	0.46765	0.4651	0.33021	0.24496	0.0253	0.06738	0.27953	0.31904	0.45417	0.42541	0.50376	0.60337	0.4056	0.05161	0.32748	0.48276	0.46733	0.66856	0.85648
504	0.07853	0.10936	0.18651	0.36451	0.49184	0.66913	0.65548	0.67319	0.82884	0.87978	0.90092	0.89018	0.91011	0.90228	0.90297	0.84228	0.65185	0.56712	0.57803	0.70251	0.79986	0.77866	0.82644	0.78945	0.77821	0.61493	0.32933	0.30939	0.22434	0.35717	0.3776	0.36234	0.18168	0.07967	0.17038	0.31952	0.49885	0.53676	0.63908	0.6045	0.64367	0.67345	0.63048	0.32313	0.12428	0.24543	0.20172	0.44248	0.70571
505	0.17359	0.20467	0.27544	0.4425	0.56767	0.72976	0.72309	0.74309	0.88933	0.9304	0.95196	0.94204	0.95911	0.95321	0.94759	0.87968	0.69907	0.60338	0.61828	0.74025	0.84696	0.83736	0.88725	0.86379	0.8532	0.70487	0.4028	0.38434	0.32605	0.45638	0.45635	0.44361	0.25759	0.15118	0.11187	0.30406	0.4711	0.51179	0.60904	0.56613	0.59059	0.61594	0.65021	0.35416	0.14927	0.24069	0.1525	0.40406	0.70188
506	0.08665	0.15495	0.23487	0.46705	0.63401	0.79542	0.75951	0.79209	0.88827	0.91924	0.86742	0.83449	0.91668	0.88094	0.92481	0.95073	0.83928	0.78681	0.79048	0.87512	0.92252	0.89023	0.89353	0.81927	0.82805	0.69918	0.52838	0.51751	0.38805	0.51636	0.55622	0.55773	0.41871	0.32623	0.08959	0.04605	0.25017	0.29406	0.42887	0.38994	0.45698	0.56047	0.43091	0.07741	0.36041	0.49034	0.43497	0.65051	0.87197
507	0.04237	0.12093	0.20215	0.45267	0.62934	0.78963	0.74198	0.77785	0.85861	0.88688	0.81264	0.77286	0.87489	0.82977	0.89022	0.94711	0.85825	0.82308	0.82281	0.8946	0.91936	0.87773	0.86534	0.7725	0.78861	0.66596	0.545	0.53679	0.38102	0.5062	0.56318	0.56951	0.44809	0.36284	0.14168	0.03545	0.17842	0.22209	0.36805	0.331	0.41573	0.54506	0.34961	0.01762	0.41189	0.55846	0.52605	0.72372	0.909
508	0.08035	0.15742	0.23568	0.48052	0.65656	0.81185	0.76689	0.8028	0.8824	0.90731	0.83544	0.79673	0.89617	0.85243	0.90991	0.96159	0.87354	0.8332	0.83489	0.90721	0.9367	0.89948	0.88907	0.80187	0.81843	0.69993	0.56859	0.56105	0.41633	0.54125	0.5899	0.59784	0.47365	0.38513	0.1577	0.03369	0.17471	0.21946	0.36319	0.32217	0.40076	0.52674	0.36479	0.00239	0.41545	0.55025	0.501	0.70411	0.90447
509	0.11647	0.16792	0.24216	0.45225	0.6084	0.77492	0.74578	0.77496	0.89621	0.93082	0.90819	0.88463	0.94365	0.91865	0.94526	0.9392	0.79804	0.73097	0.73681	0.83616	0.9054	0.87802	0.89826	0.83897	0.8443	0.70261	0.47821	0.4674	0.36349	0.49377	0.51922	0.52096	0.36302	0.26022	0.0093	0.14828	0.34082	0.38483	0.51087	0.46757	0.52124	0.60204	0.52707	0.18691	0.27459	0.3952	0.33516	0.56843	0.81903
510	0.10094	0.16205	0.23677	0.45998	0.62554	0.78863	0.75076	0.78365	0.88985	0.92122	0.87899	0.84941	0.92549	0.89209	0.93197	0.95195	0.83066	0.77573	0.77882	0.86663	0.91945	0.8866	0.89419	0.82222	0.83369	0.69948	0.51188	0.50321	0.38152	0.50998	0.54464	0.55095	0.40881	0.30953	0.06696	0.07654	0.2762	0.32099	0.45555	0.41349	0.47818	0.58029	0.46674	0.11418	0.32858	0.45611	0.40418	0.62667	0.8561
511	0.13113	0.18908	0.2607	0.47547	0.63942	0.79952	0.76795	0.799	0.90648	0.9361	0.89981	0.87213	0.9421	0.91156	0.94601	0.95603	0.83192	0.77026	0.77573	0.86577	0.92602	0.89834	0.91033	0.84675	0.85648	0.72476	0.52156	0.5124	0.40545	0.53228	0.5587	0.56491	0.41808	0.31602	0.06737	0.09313	0.28587	0.33076	0.46038	0.41595	0.47205	0.56453	0.4866	0.14362	0.32114	0.43651	0.36812	0.59605	0.84088
512	0.125	0.20355	0.27661	0.51571	0.69347	0.83964	0.79629	0.83344	0.90397	0.92313	0.848	0.80846	0.90939	0.86433	0.92166	0.9759	0.89701	0.85455	0.85759	0.92509	0.95532	0.92324	0.91158	0.82941	0.84747	0.73901	0.60822	0.60178	0.46763	0.58777	0.62987	0.64043	0.51933	0.42884	0.19845	0.05649	0.14483	0.19111	0.3331	0.28875	0.35996	0.48637	0.35645	0.0016	0.43728	0.55794	0.4877	0.6919	0.90279
513	0.08653	0.18473	0.25817	0.52055	0.71069	0.84235	0.7836	0.8256	0.85677	0.86613	0.74954	0.69792	0.83215	0.77136	0.8547	0.96125	0.93223	0.9168	0.91504	0.95519	0.94797	0.90717	0.86815	0.76219	0.79067	0.70626	0.66521	0.66268	0.49389	0.60408	0.66808	0.68443	0.59855	0.52335	0.32347	0.21904	0.01047	0.03505	0.1902	0.14946	0.24099	0.40553	0.19642	0.16623	0.5463	0.67827	0.62312	0.7921	0.94853
514	0.10489	0.19925	0.2704	0.52604	0.71465	0.84631	0.79055	0.83225	0.8688	0.87842	0.769	0.71977	0.84825	0.79036	0.86923	0.96723	0.93113	0.91053	0.90973	0.95332	0.95315	0.91464	0.87976	0.77917	0.80714	0.72014	0.66256	0.66006	0.49998	0.61165	0.66788	0.68615	0.59631	0.51649	0.31023	0.19481	0.01	0.05579	0.20844	0.16573	0.25244	0.41024	0.22341	0.1364	0.53138	0.65667	0.59485	0.7709	0.93904
515	0.12399	0.21928	0.28942	0.54343	0.73182	0.85965	0.80689	0.84851	0.88153	0.8888	0.77855	0.72932	0.85752	0.80048	0.87813	0.97374	0.9413	0.91785	0.91836	0.96135	0.96265	0.92739	0.89282	0.79569	0.82309	0.74065	0.68099	0.67848	0.52576	0.63564	0.68631	0.70354	0.61308	0.53387	0.32571	0.20066	0.00101	0.04731	0.19785	0.15311	0.23625	0.39248	0.22371	0.13178	0.53885	0.65763	0.58424	0.76154	0.93681
516	0.07187	0.1823	0.25192	0.52344	0.71951	0.8349	0.76947	0.81474	0.81483	0.81514	0.67066	0.61169	0.76719	0.69734	0.7975	0.93851	0.94895	0.95105	0.94631	0.9651	0.93205	0.88751	0.82893	0.71074	0.74667	0.68367	0.70524	0.70639	0.52321	0.62427	0.69481	0.71676	0.6589	0.59565	0.41962	0.33603	0.12963	0.08545	0.07427	0.03411	0.13653	0.32464	0.07777	0.28126	0.62094	0.7511	0.69984	0.84203	0.96112
517	0.02506	0.14305	0.21172	0.4907	0.68849	0.7952	0.71974	0.76726	0.74636	0.74284	0.57788	0.51347	0.68527	0.60689	0.72124	0.89357	0.93154	0.95322	0.94388	0.94524	0.88839	0.83624	0.76174	0.62902	0.67095	0.61985	0.6982	0.70219	0.49716	0.59169	0.67797	0.70517	0.67177	0.61921	0.46961	0.42124	0.21394	0.17182	0.00723	0.04265	0.07287	0.28056	0.02531	0.38272	0.66209	0.80063	0.77255	0.88722	0.96093
518	0.07818	0.18814	0.25718	0.52685	0.72166	0.83449	0.76852	0.81469	0.81207	0.81096	0.66538	0.60638	0.76243	0.69156	0.79172	0.93541	0.94873	0.95171	0.94652	0.96323	0.92944	0.88533	0.82579	0.70779	0.7446	0.68362	0.70812	0.70977	0.52656	0.62725	0.69844	0.72297	0.66729	0.60332	0.42888	0.3446	0.14	0.09481	0.06479	0.02409	0.12531	0.31371	0.06972	0.2875	0.6257	0.75299	0.70014	0.84053	0.95807
519	0.08539	0.1999	0.26751	0.53865	0.7348	0.84071	0.77475	0.82086	0.8065	0.80121	0.64678	0.58529	0.74709	0.67411	0.77832	0.92989	0.95718	0.96355	0.95861	0.96882	0.92828	0.88557	0.82081	0.70163	0.73999	0.68897	0.73125	0.73345	0.55061	0.64671	0.7176	0.74155	0.69301	0.63442	0.46629	0.38255	0.18073	0.1361	0.02309	0.01826	0.0837	0.27705	0.03347	0.31839	0.65185	0.77456	0.71485	0.8475	0.95862
520	0.00115	0.12467	0.1917	0.47458	0.67451	0.77381	0.69612	0.74399	0.70705	0.69964	0.52082	0.45279	0.63473	0.55197	0.67483	0.86493	0.92389	0.95621	0.94473	0.93425	0.86275	0.80806	0.72335	0.5844	0.62945	0.58945	0.70333	0.70901	0.49769	0.58564	0.67747	0.70585	0.68892	0.64503	0.51189	0.4801	0.27514	0.23458	0.06904	0.10259	0.01876	0.23705	0.09396	0.44573	0.69316	0.8322	0.81056	0.9074	0.95606
521	0.09025	0.03721	0.10243	0.38992	0.58792	0.68079	0.59247	0.64133	0.58675	0.579	0.38274	0.31077	0.50746	0.41779	0.55569	0.77825	0.86309	0.92032	0.90185	0.87287	0.77297	0.70605	0.60448	0.44807	0.49897	0.46701	0.64576	0.65563	0.41954	0.49918	0.60998	0.64348	0.65799	0.62854	0.53221	0.55454	0.34985	0.31355	0.14549	0.17029	0.03096	0.20794	0.20615	0.553	0.70585	0.86039	0.88342	0.94411	0.92849
522	0.08089	0.03878	0.10669	0.39605	0.5975	0.70642	0.62208	0.67101	0.63984	0.63847	0.45859	0.39116	0.5782	0.49377	0.62397	0.82508	0.88267	0.92665	0.90993	0.89737	0.81455	0.74762	0.65716	0.50623	0.55351	0.5021	0.63411	0.64259	0.41453	0.50515	0.60508	0.63993	0.63579	0.59615	0.47601	0.47885	0.26631	0.22819	0.05883	0.08745	0.04853	0.27905	0.11484	0.47755	0.66894	0.82669	0.84741	0.93252	0.94704
[truncated: 544 more columns]

## Sheet: Cross Correlation Light
	260	261	262	263	264	265	266	267	268	269	270	271	272	273	274	275	276	277	278	279	280	281	282	283	284	285	286	287	VVD1	VVD1	VVD1	VVD1	VVD1	VVD1	VVD1	VVD1	VVD1	VVD1	VVD1	VVD1	VVD1	VVD1	VVD1	VVD1	VVD1	VVD1	VVD1	VVD1	VVD1
260	1	0.97901	0.95611	0.86304	0.83645	0.56079	0.67259	0.60423	0.38169	0.23725	0.10205	0.01058	0.18018	0.13803	0.20473	0.37853	0.29642	0.42568	0.31297	0.27262	0.14584	0.03982	0.15044	0.2342	0.28272	0.29019	0.40227	0.41967	0.20139	0.28238	0.37514	0.44637	0.7461	0.30812	0.18725	0.1665	0.26408	0.45821	0.59577	0.06116	0.33911	0.25091	0.29723	0.23399	0.11485	0.15521	0.2372	0.1013	0.00146
261	0.97901	1	0.98098	0.9095	0.89228	0.65897	0.69252	0.5892	0.38117	0.26484	0.1232	0.04043	0.12257	0.10404	0.14939	0.30981	0.23333	0.34448	0.21959	0.18573	0.06384	0.0876	0.17798	0.22916	0.26295	0.25533	0.36674	0.38925	0.22337	0.37692	0.48077	0.34583	0.69782	0.25374	0.13944	0.15848	0.26368	0.47135	0.59141	0.04695	0.35738	0.27908	0.30462	0.24512	0.12769	0.16678	0.24568	0.10533	0.00269
262	0.95611	0.98098	1	0.94765	0.90903	0.67725	0.73961	0.61954	0.4236	0.28646	0.11704	0.0203	0.14275	0.16218	0.18519	0.34565	0.30681	0.39909	0.25358	0.20228	0.06288	0.05473	0.15311	0.17526	0.22326	0.22129	0.35854	0.39095	0.28016	0.43218	0.51042	0.27201	0.6499	0.25814	0.19832	0.17495	0.26669	0.40655	0.52412	0.0086	0.2667	0.16658	0.17687	0.11931	0.00554	0.04524	0.12609	0.01762	0.11403
263	0.86304	0.9095	0.94765	1	0.95791	0.79157	0.79493	0.62553	0.47514	0.37129	0.18802	0.09582	0.03366	0.0992	0.08901	0.23667	0.2386	0.30586	0.1307	0.06101	0.08153	0.14351	0.2242	0.18582	0.22342	0.20548	0.35141	0.38134	0.34442	0.53846	0.59182	0.12181	0.5469	0.19187	0.16003	0.15343	0.27487	0.3771	0.46072	0.01269	0.24098	0.13942	0.1231	0.06572	0.03248	0.00877	0.08402	0.05892	0.14139
264	0.83645	0.89228	0.90903	0.95791	1	0.8777	0.69693	0.5469	0.44086	0.43756	0.30028	0.23837	0.1265	0.0562	0.07855	0.07769	0.07993	0.15501	0.01686	0.07202	0.21586	0.27443	0.33595	0.27585	0.25155	0.16784	0.23939	0.24696	0.24027	0.55328	0.64194	0.13762	0.57896	0.18496	0.10056	0.19483	0.32581	0.48667	0.56509	0.0884	0.37516	0.2844	0.27589	0.24399	0.14745	0.19337	0.26175	0.12147	0.04246
265	0.56079	0.65897	0.67725	0.79157	0.8777	1	0.64375	0.3958	0.37897	0.4939	0.40146	0.38209	0.36132	0.25065	0.31027	0.19383	0.16957	0.13768	0.28219	0.30734	0.42705	0.42182	0.42777	0.31421	0.23283	0.1187	0.12827	0.1305	0.29326	0.71737	0.79107	0.18819	0.27355	0.09984	0.15876	0.08835	0.20634	0.36417	0.4056	0.08672	0.41581	0.37036	0.33672	0.3355	0.27044	0.2926	0.33752	0.22454	0.15906
266	0.67259	0.69252	0.73961	0.79493	0.69693	0.64375	1	0.87637	0.75195	0.55012	0.34125	0.18055	0.00879	0.05259	0.13941	0.27995	0.27359	0.36769	0.22923	0.09835	0.05792	0.19197	0.33582	0.36693	0.49117	0.55783	0.70571	0.74095	0.67975	0.48986	0.5212	0.03953	0.25422	0.1271	0.13343	0.24882	0.13834	0.00607	0.1233	0.23744	0.04671	0.12894	0.08529	0.13054	0.24027	0.21775	0.14671	0.26424	0.35472
267	0.60423	0.5892	0.61954	0.62553	0.5469	0.3958	0.87637	1	0.9125	0.68182	0.4796	0.28526	0.05393	0.04432	0.09885	0.23465	0.222	0.34997	0.21448	0.03799	0.10995	0.29328	0.46898	0.52507	0.67251	0.72159	0.80815	0.79707	0.61419	0.22653	0.31146	0.10474	0.25807	0.09352	0.14107	0.35727	0.26726	0.05914	0.06302	0.33899	0.21229	0.29084	0.1833	0.1958	0.32197	0.28263	0.21553	0.31111	0.38832
268	0.38169	0.38117	0.4236	0.47514	0.44086	0.37897	0.75195	0.9125	1	0.86479	0.70695	0.53768	0.33409	0.27189	0.14701	0.01812	0.0334	0.14689	0.01232	0.19488	0.3629	0.50133	0.66677	0.6604	0.76651	0.75063	0.7388	0.69635	0.63451	0.25456	0.34927	0.0789	0.04365	0.24993	0.27403	0.4508	0.37666	0.177	0.09611	0.39352	0.29182	0.32448	0.21285	0.18871	0.28183	0.23602	0.18296	0.24612	0.29027
269	0.23725	0.26484	0.28646	0.37129	0.43756	0.4939	0.55012	0.68182	0.86479	1	0.94093	0.84953	0.72176	0.64022	0.565	0.4302	0.35383	0.23996	0.35362	0.52482	0.69724	0.8013	0.90274	0.82334	0.80151	0.66616	0.52291	0.43707	0.44677	0.27715	0.44231	0.18745	0.03791	0.3487	0.41227	0.37073	0.30257	0.01792	0.00564	0.22993	0.06194	0.06962	0.03971	0.11226	0.0446	0.08714	0.11835	0.07441	0.04362
270	0.10205	0.1232	0.11704	0.18802	0.30028	0.40146	0.34125	0.4796	0.70695	0.94093	1	0.96535	0.85134	0.80687	0.72107	0.57953	0.5105	0.38215	0.43836	0.58045	0.74427	0.87406	0.95352	0.90139	0.82512	0.66004	0.42801	0.32555	0.3587	0.21282	0.39761	0.19658	0.10558	0.41944	0.51997	0.37143	0.31117	0.01725	0.02203	0.15569	0.02939	0.05857	0.19371	0.29338	0.24101	0.27254	0.29571	0.27499	0.24903
271	0.01058	0.04043	0.0203	0.09582	0.23837	0.38209	0.18055	0.28526	0.53768	0.84953	0.96535	1	0.93191	0.89704	0.83721	0.70874	0.64005	0.5213	0.55113	0.65963	0.80532	0.91177	0.94736	0.8785	0.74882	0.55217	0.2826	0.16963	0.23034	0.18485	0.37319	0.21523	0.13628	0.42149	0.53476	0.29262	0.23732	0.09225	0.06743	0.04556	0.14703	0.19602	0.31285	0.42106	0.38892	0.41296	0.42327	0.41696	0.40009
272	0.18018	0.12257	0.14275	0.03366	0.1265	0.36132	0.00879	0.05393	0.33409	0.72176	0.85134	0.93191	1	0.9456	0.95897	0.90367	0.827	0.76745	0.78882	0.84573	0.91967	0.93069	0.87687	0.7339	0.56055	0.33658	0.06359	0.05877	0.05469	0.16407	0.35342	0.36134	0.28655	0.45318	0.53934	0.21901	0.18383	0.11592	0.02601	0.05745	0.21842	0.29224	0.3526	0.4621	0.46615	0.48074	0.46182	0.48158	0.49286
273	0.13803	0.10404	0.16218	0.0992	0.0562	0.25065	0.05259	0.04432	0.27189	0.64022	0.80687	0.89704	0.9456	1	0.94967	0.88224	0.87555	0.77145	0.74324	0.77278	0.8202	0.9266	0.86881	0.81205	0.65005	0.45506	0.17238	0.03797	0.01537	0.01424	0.23986	0.22787	0.22529	0.46286	0.60946	0.27756	0.23779	0.17636	0.07983	0.09982	0.28253	0.37669	0.47661	0.57979	0.56751	0.57286	0.55574	0.58263	0.57511
274	0.20473	0.14939	0.18519	0.08901	0.07855	0.31027	0.13941	0.09885	0.14701	0.565	0.72107	0.83721	0.95897	0.94967	1	0.9511	0.89378	0.84181	0.83991	0.84763	0.88389	0.88831	0.78722	0.64901	0.45206	0.22568	0.04641	0.17413	0.09061	0.09648	0.29019	0.31141	0.2549	0.40183	0.50134	0.1193	0.0982	0.21573	0.09788	0.16926	0.32666	0.40662	0.45352	0.55425	0.5693	0.57641	0.54824	0.57638	0.59045
275	0.37853	0.30981	0.34565	0.23667	0.07769	0.19383	0.27995	0.23465	0.01812	0.4302	0.57953	0.70874	0.90367	0.88223	0.9511	1	0.95079	0.94743	0.93531	0.91882	0.88038	0.81466	0.66518	0.49297	0.30206	0.08474	0.16087	0.2831	0.20698	0.00659	0.17445	0.38319	0.38166	0.40325	0.47922	0.12542	0.11189	0.15738	0.00523	0.20252	0.2867	0.37967	0.38438	0.47768	0.51996	0.5215	0.46675	0.52066	0.56158
276	0.29642	0.23333	0.30681	0.2386	0.07993	0.16957	0.27359	0.222	0.0334	0.35383	0.5105	0.64005	0.827	0.87555	0.89378	0.95079	1	0.9681	0.91891	0.86053	0.7802	0.78704	0.62842	0.52216	0.34482	0.15633	0.08138	0.20503	0.25007	0.09102	0.1306	0.27735	0.29462	0.3913	0.54022	0.17893	0.15493	0.23153	0.08199	0.2436	0.37283	0.49022	0.51456	0.59211	0.61604	0.61396	0.56101	0.61296	0.63266
277	0.42568	0.34448	0.39909	0.30586	0.15501	0.13768	0.36769	0.34997	0.14689	0.23996	0.38215	0.5213	0.76745	0.77145	0.84181	0.94743	0.9681	1	0.9593	0.87843	0.76463	0.68392	0.49289	0.33609	0.1525	0.03112	0.2446	0.35245	0.30263	0.05323	0.11858	0.38608	0.39796	0.37744	0.46698	0.10569	0.10357	0.16699	0.00488	0.23934	0.31897	0.43498	0.4135	0.48784	0.53703	0.52896	0.46411	0.52939	0.57073
278	0.31297	0.21959	0.25358	0.1307	0.01686	0.28219	0.22923	0.21448	0.01232	0.35362	0.43836	0.55113	0.78882	0.74324	0.83991	0.93531	0.91891	0.9593	1	0.9552	0.863	0.74366	0.56114	0.34797	0.17036	0.03291	0.21559	0.32406	0.25688	0.04449	0.20776	0.3883	0.32341	0.31785	0.38443	0.05107	0.01576	0.22604	0.06467	0.24334	0.32414	0.40233	0.36107	0.42623	0.46557	0.47147	0.41251	0.45194	0.49268
279	0.27262	0.18573	0.20228	0.06101	0.07202	0.30734	0.09835	0.03799	0.19488	0.52482	0.58045	0.65963	0.84573	0.77278	0.84763	0.91882	0.86053	0.87843	0.9552	1	0.95106	0.83476	0.69099	0.46228	0.3124	0.10485	0.07385	0.19018	0.13011	0.0592	0.22481	0.38843	0.32329	0.33154	0.38624	0.12702	0.06965	0.16534	0.02469	0.16364	0.22506	0.28501	0.26463	0.33363	0.3617	0.37983	0.32847	0.35717	0.39794
280	0.14584	0.06384	0.06288	0.08153	0.21586	0.42705	0.05792	0.10995	0.3629	0.69724	0.74427	0.80532	0.91967	0.8202	0.88389	0.88038	0.7802	0.76463	0.863	0.95106	1	0.91415	0.82159	0.59358	0.44046	0.2151	0.01681	0.1008	0.0065	0.17557	0.33578	0.36188	0.2424	0.33112	0.38035	0.11671	0.05246	0.18273	0.07364	0.12227	0.22214	0.25106	0.25368	0.33279	0.34368	0.36916	0.33806	0.34261	0.36913
281	0.03982	0.0876	0.05473	0.14351	0.27443	0.42182	0.19197	0.29328	0.50133	0.8013	0.87406	0.91177	0.93069	0.9266	0.88831	0.81466	0.78704	0.68392	0.74366	0.83476	0.91415	1	0.96049	0.84856	0.72261	0.52407	0.29976	0.16667	0.12631	0.11297	0.33376	0.20443	0.11529	0.38937	0.52014	0.26058	0.17683	0.22321	0.1534	0.0805	0.2633	0.30999	0.39104	0.47163	0.4383	0.46233	0.45364	0.4446	0.4302
282	0.15044	0.17798	0.15311	0.2242	0.33595	0.42777	0.33582	0.46898	0.66677	0.90274	0.95352	0.94736	0.87687	0.86881	0.78722	0.66518	0.62842	0.49289	0.56114	0.69099	0.82159	0.96049	1	0.93327	0.84615	0.67292	0.457	0.3355	0.28386	0.15131	0.36127	0.14305	0.05141	0.38936	0.5212	0.33822	0.24678	0.14717	0.12663	0.03233	0.16044	0.19372	0.31204	0.39326	0.3367	0.36829	0.38064	0.35593	0.32668
283	0.2342	0.22916	0.17526	0.18582	0.27585	0.31421	0.36693	0.52507	0.6604	0.82334	0.90139	0.8785	0.7339	0.81205	0.64901	0.49297	0.52216	0.33609	0.34797	0.46228	0.59358	0.84856	0.93327	1	0.95246	0.83989	0.62805	0.51547	0.36497	0.07297	0.29401	0.01545	0.0187	0.41242	0.58803	0.44065	0.35317	0.11395	0.12572	0.08829	0.13638	0.18635	0.36235	0.43542	0.35404	0.37568	0.40472	0.37867	0.32097
284	0.28272	0.26295	0.22326	0.22342	0.25155	0.23283	0.49117	0.67251	0.76651	0.80151	0.82512	0.74882	0.56055	0.65005	0.45206	0.30206	0.34482	0.1525	0.17036	0.3124	0.44046	0.72261	0.84615	0.95246	1	0.94882	0.80477	0.71082	0.49873	0.0332	0.23395	0.01207	0.01396	0.40107	0.5523	0.54255	0.45333	0.01253	0.02356	0.19502	0.02439	0.02038	0.20316	0.25107	0.16	0.1854	0.21967	0.1904	0.1301
285	0.29019	0.25533	0.22129	0.20548	0.16784	0.1187	0.55783	0.72159	0.75063	0.66616	0.66004	0.55217	0.33658	0.45506	0.22568	0.08474	0.15633	0.03112	0.03291	0.10485	0.2151	0.52407	0.67292	0.83989	0.94882	1	0.92719	0.86379	0.62875	0.02342	0.17212	0.018	0.01184	0.41555	0.53684	0.62279	0.53884	0.14411	0.0881	0.28483	0.15625	0.10989	0.07649	0.09958	0.00334	0.01761	0.06058	0.0333	0.03557
286	0.40227	0.36674	0.35854	0.35141	0.23939	0.12827	0.70571	0.80815	0.7388	0.52291	0.42801	0.2826	0.06359	0.17238	0.04641	0.16087	0.08138	0.2446	0.21559	0.07385	0.01681	0.29976	0.457	0.62805	0.80477	0.92719	1	0.97868	0.69296	0.04137	0.14128	0.04006	0.03942	0.3248	0.3811	0.5883	0.48843	0.17998	0.10745	0.30038	0.2247	0.21809	0.07972	0.10477	0.20688	0.19191	0.14475	0.19159	0.26592
287	0.41967	0.38925	0.39095	0.38134	0.24696	0.1305	0.74095	0.79707	0.69635	0.43707	0.32555	0.16963	0.05877	0.03797	0.17413	0.2831	0.20503	0.35245	0.32406	0.19018	0.1008	0.16667	0.3355	0.51547	0.71082	0.86379	0.97868	1	0.74144	0.09818	0.1702	0.01357	0.03387	0.32143	0.35023	0.58587	0.48964	0.23649	0.14322	0.35046	0.27627	0.27357	0.14755	0.18492	0.28873	0.27564	0.2222	0.27665	0.35325
VVD1	0.20139	0.22337	0.28016	0.34442	0.24027	0.29326	0.67975	0.61419	0.63451	0.44677	0.3587	0.23034	0.05469	0.01537	0.09061	0.20698	0.25007	0.30263	0.25688	0.13011	0.0065	0.12631	0.28386	0.36497	0.49873	0.62875	0.69296	0.74144	1	0.59588	0.50557	0.38604	0.20675	0.47312	0.40436	0.51211	0.4369	0.41741	0.33584	0.49629	0.41493	0.39689	0.30465	0.30007	0.35783	0.36192	0.30166	0.34729	0.39622
VVD1	0.28238	0.37692	0.43218	0.53846	0.55328	0.71737	0.48986	0.22653	0.25456	0.27715	0.21282	0.18485	0.16407	0.01424	0.09648	0.00659	0.09102	0.05323	0.04449	0.0592	0.17557	0.11297	0.15131	0.07297	0.0332	0.02342	0.04137	0.09818	0.59588	1	0.90029	0.49503	0.05339	0.32676	0.26513	0.06255	0.02826	0.04806	0.00888	0.23289	0.01653	0.04141	0.02799	0.05376	0.03101	0.02356	0.08494	0.00855	0.03261
VVD1	0.37514	0.48077	0.51042	0.59182	0.64194	0.79107	0.5212	0.31146	0.34927	0.44231	0.39761	0.37319	0.35342	0.23986	0.29019	0.17445	0.1306	0.11858	0.20776	0.22481	0.33578	0.33376	0.36127	0.29401	0.23395	0.17212	0.14128	0.1702	0.50557	0.90029	1	0.51878	0.0548	0.41512	0.41229	0.18098	0.099	0.03978	0.09426	0.22389	0.12455	0.17346	0.18875	0.23278	0.17988	0.18812	0.25256	0.17131	0.11891
VVD1	0.44637	0.34583	0.27201	0.12181	0.13762	0.18819	0.03953	0.10474	0.0789	0.18745	0.19658	0.21523	0.36134	0.22787	0.31141	0.38319	0.27735	0.38608	0.3883	0.38843	0.36188	0.20443	0.14305	0.01545	0.01207	0.018	0.04006	0.01357	0.38604	0.49503	0.51878	1	0.83527	0.71364	0.50089	0.39992	0.42104	0.49667	0.58697	0.3605	0.34306	0.24616	0.2924	0.22273	0.17589	0.19849	0.20987	0.1695	0.12975
VVD1	0.7461	0.69782	0.6499	0.5469	0.57896	0.27355	0.25422	0.25807	0.04365	0.03791	0.10558	0.13628	0.28655	0.22529	0.2549	0.38166	0.29462	0.39796	0.32341	0.32329	0.2424	0.11529	0.05141	0.0187	0.01396	0.01184	0.03942	0.03387	0.20675	0.05339	0.0548	0.83527	1	0.75313	0.52516	0.51297	0.57417	0.67261	0.79051	0.37099	0.48737	0.35845	0.38156	0.30799	0.23325	0.26497	0.30664	0.20481	0.13592
VVD1	0.30812	0.25374	0.25814	0.19187	0.18496	0.09984	0.1271	0.09352	0.24993	0.3487	0.41944	0.42149	0.45318	0.46286	0.40183	0.40325	0.3913	0.37744	0.31785	0.33154	0.33112	0.38937	0.38936	0.41242	0.40107	0.41555	0.3248	0.32143	0.47312	0.32676	0.41512	0.71364	0.75313	1	0.89367	0.72756	0.69791	0.50774	0.54264	0.42931	0.25325	0.0912	0.02418	0.05574	0.0543	0.03242	0.03845	0.07898	0.07193
VVD1	0.18725	0.13944	0.19832	0.16003	0.10056	0.15876	0.13343	0.14107	0.27403	0.41227	0.51997	0.53476	0.53934	0.60946	0.50134	0.47922	0.54022	0.46698	0.38443	0.38624	0.38035	0.52014	0.5212	0.58803	0.5523	0.53684	0.3811	0.35023	0.40436	0.26513	0.41229	0.50089	0.52516	0.89367	1	0.78329	0.70491	0.31264	0.31495	0.32453	0.07304	0.10437	0.21665	0.29994	0.27404	0.26085	0.26344	0.29035	0.26313
VVD1	0.1665	0.15848	0.17495	0.15343	0.19483	0.08835	0.24882	0.35727	0.4508	0.37073	0.37143	0.29262	0.21901	0.27756	0.1193	0.12542	0.17893	0.10569	0.05107	0.12702	0.11671	0.26058	0.33822	0.44065	0.54255	0.62279	0.5883	0.58587	0.51211	0.06255	0.18098	0.39992	0.51297	0.72756	0.78329	1	0.89526	0.59287	0.50242	0.47439	0.44356	0.30911	0.20219	0.15749	0.19068	0.18036	0.1771	0.14993	0.15473
VVD1	0.26408	0.26368	0.26669	0.27487	0.32581	0.20634	0.13834	0.26726	0.37666	0.30257	0.31117	0.23732	0.18383	0.23779	0.0982	0.11189	0.15493	0.10357	0.01576	0.06965	0.05246	0.17683	0.24678	0.35317	0.45333	0.53884	0.48843	0.48964	0.4369	0.02826	0.099	0.42104	0.57417	0.69791	0.70491	0.89526	1	0.69469	0.66463	0.60389	0.51366	0.38877	0.28212	0.22293	0.24454	0.24484	0.24911	0.20439	0.21213
VVD1	0.45821	0.47135	0.40655	0.3771	0.48667	0.36417	0.00607	0.05914	0.177	0.01792	0.01725	0.09225	0.11592	0.17636	0.21573	0.15738	0.23153	0.16699	0.22604	0.16534	0.18273	0.22321	0.14717	0.11395	0.01253	0.14411	0.17998	0.23649	0.41741	0.04806	0.03978	0.49667	0.67261	0.50774	0.31264	0.59287	0.69469	1	0.86921	0.6446	0.75801	0.64694	0.61738	0.58135	0.54987	0.56634	0.56376	0.49501	0.4565
VVD1	0.59577	0.59141	0.52412	0.46072	0.56509	0.4056	0.1233	0.06302	0.09611	0.00564	0.02203	0.06743	0.02601	0.07983	0.09788	0.00523	0.08199	0.00488	0.06467	0.02469	0.07364	0.1534	0.12663	0.12572	0.02356	0.0881	0.10745	0.14322	0.33584	0.00888	0.09426	0.58697	0.79051	0.54264	0.31495	0.50242	0.66463	0.86921	1	0.62057	0.764	0.64304	0.63562	0.58468	0.52848	0.55358	0.5704	0.48073	0.4285
VVD1	0.06116	0.04695	0.0086	0.01269	0.0884	0.08672	0.23744	0.33899	0.39352	0.22993	0.15569	0.04556	0.05745	0.09982	0.16926	0.20252	0.2436	0.23934	0.24334	0.16364	0.12227	0.0805	0.03233	0.08829	0.19502	0.28483	0.30038	0.35046	0.49629	0.23289	0.22389	0.3605	0.37099	0.42931	0.32453	0.47439	0.60389	0.6446	0.62056	1	0.78125	0.67728	0.57373	0.49192	0.53453	0.53352	0.49219	0.48817	0.50919
VVD1	0.33911	0.35738	0.2667	0.24098	0.37516	0.41581	0.04671	0.21229	0.29182	0.06194	0.02939	0.14703	0.21842	0.28253	0.32666	0.2867	0.37283	0.31897	0.32414	0.22506	0.22214	0.2633	0.16044	0.13638	0.02439	0.15625	0.2247	0.27627	0.41493	0.01653	0.12455	0.34306	0.48737	0.25325	0.07304	0.44356	0.51366	0.75801	0.764	0.78125	1	0.93945	0.88214	0.82427	0.8188	0.81881	0.8036	0.75279	0.71405
VVD1	0.25091	0.27907	0.16658	0.13942	0.2844	0.37036	0.12894	0.29084	0.32448	0.06962	0.05857	0.19602	0.29224	0.37669	0.40662	0.37967	0.49022	0.43498	0.40233	0.28501	0.25106	0.30999	0.19372	0.18635	0.02038	0.10989	0.21809	0.27357	0.39689	0.04141	0.17346	0.24616	0.35845	0.0912	0.10437	0.30911	0.38877	0.64694	0.64304	0.67728	0.93945	1	0.95849	0.91442	0.92408	0.92149	0.90918	0.88441	0.85501
VVD1	0.29723	0.30462	0.17687	0.1231	0.27589	0.33672	0.08529	0.1833	0.21285	0.03971	0.19371	0.31285	0.3526	0.47661	0.45352	0.38438	0.51456	0.4135	0.36107	0.26463	0.25368	0.39104	0.31204	0.36235	0.20316	0.07649	0.07972	0.14755	0.30465	0.02799	0.18875	0.2924	0.38156	0.02418	0.21665	0.20219	0.28212	0.61738	0.63562	0.57373	0.88214	0.95849	1	0.97702	0.96045	0.95855	0.9623	0.93619	0.88832
VVD1	0.23399	0.24512	0.11931	0.06572	0.24399	0.3355	0.13054	0.1958	0.18871	0.11226	0.29338	0.42106	0.4621	0.57979	0.55425	0.47768	0.59211	0.48784	0.42623	0.33363	0.33279	0.47163	0.39326	0.43542	0.25107	0.09958	0.10477	0.18492	0.30007	0.05376	0.23278	0.22273	0.30799	0.05574	0.29994	0.15749	0.22293	0.58135	0.58468	0.49192	0.82427	0.91442	0.97702	1	0.98062	0.97258	0.97722	0.96004	0.91232
VVD1	0.11485	0.12769	0.00554	0.03248	0.14745	0.27044	0.24027	0.32197	0.28183	0.0446	0.24101	0.38892	0.46615	0.56751	0.5693	0.51996	0.61604	0.53703	0.46557	0.3617	0.34368	0.4383	0.3367	0.35404	0.16	0.00334	0.20688	0.28873	0.35783	0.03101	0.17988	0.17589	0.23325	0.0543	0.27404	0.19068	0.24454	0.54987	0.52848	0.53453	0.8188	0.92408	0.96045	0.98062	1	0.99059	0.97818	0.9812	0.95643
VVD1	0.15521	0.16678	0.04524	0.00877	0.19337	0.2926	0.21775	0.28263	0.23602	0.08714	0.27254	0.41296	0.48074	0.57286	0.57641	0.5215	0.61396	0.52896	0.47147	0.37983	0.36916	0.46233	0.36829	0.37568	0.1854	0.01761	0.19191	0.27565	0.36192	0.02356	0.18812	0.19849	0.26497	0.03242	0.26085	0.18036	0.24484	0.56634	0.55358	0.53352	0.81881	0.92149	0.95855	0.97258	0.99059	1	0.9881	0.98457	0.96583
VVD1	0.2372	0.24568	0.12609	0.08402	0.26175	0.33752	0.14671	0.21553	0.18296	0.11835	0.29571	0.42327	0.46182	0.55574	0.54824	0.46675	0.56101	0.46411	0.41251	0.32847	0.33806	0.45364	0.38064	0.40472	0.21967	0.06058	0.14475	0.2222	0.30166	0.08494	0.25256	0.20987	0.30664	0.03845	0.26344	0.1771	0.24911	0.56376	0.5704	0.49219	0.8036	0.90918	0.9623	0.97722	0.97818	0.9881	1	0.98409	0.95136
VVD1	0.1013	0.10533	0.01762	0.05892	0.12147	0.22454	0.26424	0.31111	0.24612	0.07441	0.27499	0.41696	0.48158	0.58263	0.57638	0.52066	0.61296	0.52939	0.45194	0.35717	0.34261	0.4446	0.35593	0.37867	0.1904	0.0333	0.19159	0.27665	0.34729	0.00855	0.17131	0.1695	0.20481	0.07898	0.29035	0.14993	0.20439	0.49501	0.48073	0.48817	0.75279	0.88441	0.93619	0.96004	0.9812	0.98457	0.98409	1	0.98434
VVD1	0.00146	0.00269	0.11403	0.14139	0.04246	0.15906	0.35472	0.38832	0.29027	0.04362	0.24903	0.40009	0.49286	0.57511	0.59045	0.56158	0.63266	0.57073	0.49268	0.39794	0.36913	0.4302	0.32668	0.32097	0.1301	0.03557	0.26592	0.35325	0.39622	0.03261	0.11891	0.12975	0.13592	0.07193	0.26313	0.15473	0.21213	0.4565	0.4285	0.50919	0.71405	0.85501	0.88832	0.91232	0.95643	0.96583	0.95136	0.98434	1
VVD1	0.09829	0.10976	0.00107	0.01881	0.16112	0.25734	0.25867	0.30885	0.21947	0.1017	0.28374	0.42094	0.49747	0.56582	0.58542	0.53633	0.60042	0.53299	0.47868	0.39528	0.38839	0.4519	0.36151	0.34647	0.16059	0.01082	0.22692	0.30737	0.34077	0.05234	0.21346	0.12069	0.1819	0.07295	0.25394	0.15925	0.23913	0.48323	0.46874	0.48961	0.71921	0.85827	0.88932	0.90759	0.93977	0.95907	0.96084	0.97416	0.98444
VVD1	0.06485	0.07197	0.04342	0.0727	0.10415	0.2088	0.27526	0.30957	0.21366	0.10548	0.30696	0.44562	0.5115	0.60026	0.59789	0.54274	0.61665	0.54026	0.46022	0.37219	0.36576	0.45794	0.37513	0.38748	0.20369	0.04317	0.18754	0.27092	0.30923	0.03314	0.20229	0.1065	0.13533	0.13634	0.31605	0.11023	0.16479	0.42194	0.40817	0.42432	0.67582	0.83105	0.88361	0.91311	0.9382	0.94778	0.95564	0.97886	0.9776
VVD1	0.0385	0.04126	0.15065	0.17949	0.00308	0.10401	0.38266	0.40359	0.28108	0.03731	0.2512	0.40112	0.47988	0.55561	0.56902	0.53233	0.58474	0.52678	0.43643	0.34679	0.3311	0.39189	0.3054	0.30628	0.12146	0.03784	0.27242	0.35367	0.36271	0.02645	0.11258	0.10426	0.08571	0.10663	0.26712	0.13157	0.17946	0.36781	0.35345	0.42466	0.61764	0.78174	0.82238	0.8547	0.90109	0.91064	0.9078	0.952	0.97505
VVD1	0.06091	0.07478	0.17527	0.21174	0.05194	0.01316	0.40982	0.39217	0.25506	0.02659	0.22272	0.35706	0.42233	0.48423	0.49966	0.46951	0.4987	0.44758	0.36869	0.30412	0.29418	0.33532	0.26408	0.25513	0.09245	0.06298	0.28103	0.35568	0.38523	0.10232	0.02935	0.13627	0.06526	0.07531	0.20306	0.11015	0.16481	0.29411	0.29958	0.38869	0.52875	0.69892	0.73003	0.75307	0.80987	0.83365	0.83093	0.88218	0.92704
VVD1	0.20774	0.22964	0.28326	0.31246	0.21069	0.16486	0.46602	0.44129	0.26943	0.08637	0.07304	0.17486	0.23176	0.23044	0.27721	0.26711	0.21943	0.22782	0.1567	0.12404	0.1265	0.08607	0.04767	0.01741	0.09122	0.1985	0.36431	0.40135	0.30672	0.07957	0.04285	0.02647	0.09838	0.07027	0.06494	0.11331	0.12862	0.02378	0.03859	0.2153	0.24357	0.41878	0.4198	0.43636	0.52441	0.5481	0.54992	0.62247	0.70315
VVD1	0.08579	0.07559	0.08514	0.07212	0.00274	0.05197	0.29024	0.36038	0.20303	0.05925	0.03404	0.10849	0.16231	0.08095	0.18683	0.15046	0.04713	0.09692	0.08473	0.0643	0.11047	0.00397	0.02028	0.10509	0.20568	0.3037	0.41251	0.41591	0.15428	0.22857	0.19996	0.10726	0.07319	0.05221	0.0344	0.21882	0.24025	0.000622	0.02596	0.14027	0.19403	0.33635	0.30218	0.30892	0.39242	0.41695	0.44297	0.48	0.55263
VVD1	0.24959	0.28262	0.25732	0.2741	0.38196	0.41351	0.04094	0.198	0.1185	0.05709	0.12684	0.19899	0.21579	0.14148	0.24445	0.14341	0.08062	0.08711	0.11856	0.08401	0.17186	0.1201	0.10465	0.02654	0.10986	0.23476	0.33578	0.33851	0.09117	0.45946	0.46363	0.0144	0.20805	0.01072	0.00911	0.3059	0.38326	0.28411	0.33311	0.24604	0.4523	0.55161	0.52717	0.52579	0.56234	0.59055	0.64071	0.61548	0.63585
VVD1	0.40377	0.4477	0.46603	0.51484	0.57616	0.56284	0.20604	0.01172	0.04412	0.12685	0.10503	0.11983	0.09122	0.0418	0.07789	0.04745	0.14711	0.12533	0.02742	0.01957	0.11325	0.0325	0.05837	0.04517	0.13693	0.22959	0.24856	0.21983	0.09182	0.63992	0.59028	0.05267	0.28271	0.07515	0.12302	0.33083	0.42298	0.24788	0.32109	0.12669	0.31925	0.34969	0.30933	0.29509	0.305	0.34007	0.40992	0.34302	0.34603
VVD1	0.65683	0.68251	0.6729	0.66897	0.72952	0.63255	0.37428	0.20869	0.15307	0.18488	0.15164	0.14011	0.02802	0.04014	0.0119	0.1684	0.20538	0.25223	0.15299	0.14164	0.01743	0.05176	0.12158	0.09996	0.02833	0.04486	0.05176	0.02259	0.14241	0.6074	0.60406	0.15933	0.51669	0.14205	0.09639	0.29657	0.40622	0.38176	0.49888	0.11596	0.40501	0.40623	0.41534	0.39381	0.35161	0.38743	0.47532	0.37264	0.32646
VVD1	0.60522	0.62966	0.61328	0.60141	0.66627	0.56687	0.32806	0.20691	0.17744	0.22443	0.21608	0.20516	0.08772	0.03682	0.06776	0.11194	0.14321	0.20266	0.12699	0.1088	0.04509	0.10394	0.17794	0.16996	0.09955	0.02016	0.01461	0.00405	0.13981	0.54952	0.58874	0.12981	0.44747	0.0643	0.01422	0.20806	0.3046	0.32893	0.4304	0.06265	0.35428	0.39283	0.42334	0.41884	0.37401	0.41291	0.50365	0.41412	0.37199
VVD1	0.73267	0.71467	0.65554	0.57281	0.64108	0.41667	0.34257	0.3498	0.26199	0.27509	0.27839	0.2453	0.05758	0.10346	0.04035	0.15489	0.10634	0.25185	0.19763	0.16006	0.01662	0.16852	0.27698	0.3544	0.31859	0.24695	0.20531	0.20138	0.04832	0.22387	0.36237	0.4251	0.62023	0.15708	0.00838	0.09408	0.20609	0.42663	0.56094	0.09285	0.38969	0.41606	0.49997	0.48759	0.40548	0.45964	0.5444	0.45137	0.388
VVD1	0.74568	0.73953	0.68156	0.5895	0.6632	0.49277	0.39681	0.37832	0.28066	0.31456	0.32906	0.29673	0.11133	0.16001	0.09269	0.11617	0.0625	0.2112	0.16345	0.1375	0.0143	0.21187	0.31826	0.40894	0.36062	0.28735	0.22833	0.22851	0.12167	0.33557	0.48656	0.32066	0.56293	0.04246	0.12167	0.05767	0.15467	0.41223	0.54878	0.01797	0.39709	0.42071	0.52259	0.53221	0.43313	0.47286	0.56315	0.4612	0.37659
VVD1	0.40577	0.39257	0.41685	0.31834	0.2926	0.17823	0.32127	0.32212	0.27306	0.18067	0.16263	0.07945	0.09724	0.13565	0.17376	0.3268	0.38925	0.43907	0.40169	0.3307	0.17427	0.09449	0.04644	0.12184	0.15483	0.16333	0.16213	0.21337	0.30541	0.3408	0.38359	0.00478	0.13515	0.10209	0.01658	0.02008	0.02755	0.08148	0.04273	0.33499	0.06625	0.06637	0.01586	0.04085	0.03289	0.02207	0.06851	0.00426	0.04727
VVD1	0.61201	0.556	0.59939	0.48183	0.38835	0.09861	0.49203	0.52698	0.36403	0.10044	0.02075	0.16748	0.43134	0.44875	0.52073	0.69039	0.72811	0.80004	0.72058	0.61736	0.44625	0.32665	0.12676	0.00607	0.11306	0.19637	0.31281	0.38503	0.33162	0.18158	0.14823	0.3268	0.44718	0.25132	0.31253	0.12256	0.09415	0.02655	0.15095	0.30978	0.17722	0.27996	0.2007	0.23043	0.32795	0.30898	0.21395	0.30751	0.37715
VVD1	0.57617	0.52812	0.52817	0.39817	0.32794	0.0957	0.47718	0.5605	0.44479	0.25297	0.20056	0.07763	0.17932	0.12282	0.25696	0.43703	0.41703	0.54467	0.51509	0.42079	0.26779	0.05406	0.12913	0.29997	0.40069	0.46345	0.49308	0.52795	0.40084	0.1557	0.23589	0.22376	0.30858	0.03178	0.02468	0.09822	0.11638	0.03191	0.10979	0.34694	0.10885	0.12042	0.02379	0.02116	0.0913	0.07761	0.02447	0.0526	0.13448
VVD1	0.34458	0.29607	0.32266	0.22058	0.14789	0.04736	0.29833	0.41239	0.39167	0.24488	0.20881	0.10294	0.09689	0.08736	0.17759	0.31607	0.34557	0.42355	0.41096	0.31388	0.17735	0.0428	0.11177	0.22563	0.30848	0.35438	0.34232	0.36258	0.3686	0.14045	0.1842	0.05157	0.10397	0.07479	0.00736	0.07099	0.13679	0.17028	0.08881	0.39913	0.25132	0.22851	0.08931	0.06917	0.13834	0.12576	0.0311	0.07086	0.11736
VVD1	0.17641	0.198	0.25828	0.32365	0.30607	0.24191	0.10766	0.06247	0.18566	0.27321	0.41358	0.42386	0.38686	0.51552	0.38106	0.35181	0.42047	0.32728	0.20419	0.22312	0.21849	0.39449	0.41085	0.53575	0.53682	0.5294	0.33482	0.26718	0.19814	0.14373	0.00889	0.18275	0.32488	0.4781	0.54045	0.37913	0.44203	0.18373	0.25399	0.21802	0.09034	0.07345	0.24226	0.3089	0.29435	0.27648	0.29833	0.35324	0.3374
VVD1	0.38325	0.36543	0.25407	0.14793	0.22214	0.19109	0.19578	0.27345	0.25738	0.36103	0.47837	0.48931	0.37511	0.55325	0.39007	0.25844	0.40359	0.22366	0.15837	0.15339	0.20282	0.49866	0.54116	0.71191	0.6719	0.62713	0.45951	0.39106	0.16852	0.03069	0.24604	0.17552	0.20754	0.29038	0.5019	0.22985	0.17392	0.28035	0.31264	0.05177	0.39622	0.50934	0.68878	0.71192	0.63462	0.63657	0.68748	0.66059	0.58021
VVD1	0.58229	0.56228	0.44699	0.33158	0.41085	0.32464	0.32157	0.36375	0.26524	0.33784	0.4168	0.41682	0.2754	0.46026	0.29855	0.14103	0.30733	0.10995	0.07883	0.0704	0.13765	0.45252	0.50472	0.67978	0.63804	0.59458	0.47441	0.41637	0.1339	0.05485	0.25984	0.35883	0.45259	0.11578	0.38296	0.13133	0.03845	0.45643	0.53259	0.14844	0.52492	0.56814	0.73353	0.734	0.6286	0.63437	0.68594	0.6219	0.51578
VVD1	0.54174	0.52403	0.3994	0.30118	0.40525	0.34392	0.24792	0.27629	0.1974	0.31658	0.41442	0.438	0.32567	0.50076	0.36138	0.2152	0.37611	0.18856	0.15905	0.1378	0.19659	0.4841	0.51265	0.65994	0.59005	0.51735	0.37573	0.3074	0.03628	0.04124	0.24509	0.38256	0.47693	0.07102	0.358	0.06673	0.03424	0.52341	0.5934	0.25587	0.62439	0.67208	0.81999	0.81655	0.72917	0.74028	0.78072	0.72274	0.63015
VVD1	0.62767	0.62643	0.51267	0.42879	0.52733	0.44613	0.33321	0.33282	0.23646	0.34121	0.38887	0.39657	0.29373	0.4358	0.32199	0.18541	0.33764	0.16168	0.17684	0.16394	0.22641	0.477	0.50063	0.60734	0.54499	0.46488	0.36645	0.30645	0.01157	0.06606	0.27536	0.40716	0.55538	0.01047	0.27416	0.01559	0.09481	0.60087	0.66601	0.30139	0.67778	0.68463	0.79573	0.76984	0.68017	0.70391	0.73609	0.65634	0.56427
VVD1	0.53183	0.54906	0.43505	0.38467	0.51599	0.49735	0.20524	0.14177	0.07768	0.26133	0.32919	0.38021	0.3465	0.44617	0.39631	0.29262	0.41612	0.28218	0.3049	0.26473	0.30711	0.47381	0.448	0.48849	0.37605	0.25416	0.1411	0.07833	0.14648	0.08804	0.27566	0.3754	0.54188	0.07424	0.20253	0.13086	0.23459	0.67959	0.72292	0.45502	0.82298	0.82696	0.8823	0.85094	0.79686	0.82068	0.83082	0.75971	0.69126
VVD1	0.51894	0.55013	0.45567	0.438	0.56795	0.53454	0.21506	0.15554	0.11353	0.29297	0.31705	0.35934	0.34534	0.39308	0.38059	0.30167	0.38564	0.27867	0.34906	0.33427	0.37732	0.47354	0.43803	0.40972	0.30248	0.15569	0.07418	0.01636	0.20736	0.06605	0.24957	0.36993	0.54787	0.15234	0.09938	0.16409	0.28412	0.6765	0.7221	0.4794	0.79694	0.77357	0.78384	0.73982	0.69856	0.74215	0.73748	0.66172	0.61784
VVD1	0.37982	0.41003	0.31625	0.3115	0.45336	0.43864	0.07829	0.04062	0.03339	0.2429	0.27842	0.33896	0.3637	0.39394	0.40637	0.36377	0.4289	0.34407	0.40941	0.39481	0.41251	0.45817	0.39743	0.33206	0.21545	0.04536	0.04421	0.10995	0.34672	0.05277	0.13517	0.36696	0.48215	0.18806	0.05614	0.18476	0.29432	0.65338	0.68234	0.53336	0.78519	0.76789	0.74772	0.70582	0.69186	0.74083	0.71422	0.65996	0.64334
VVD1	0.20183	0.26002	0.20018	0.25734	0.41428	0.48201	0.01688	0.0915	0.01799	0.25874	0.29884	0.38246	0.47261	0.41696	0.50435	0.49539	0.48413	0.46076	0.54707	0.53742	0.5555	0.48661	0.39094	0.22978	0.07532	0.13409	0.24001	0.30383	0.36703	0.06647	0.21381	0.15461	0.30609	0.13614	0.03869	0.22359	0.33282	0.56994	0.56802	0.51839	0.70836	0.69573	0.62823	0.60887	0.63402	0.6876	0.64682	0.60814	0.62972
VVD1	0.13983	0.19626	0.15019	0.21492	0.35456	0.41895	0.05744	0.14096	0.07699	0.17298	0.18639	0.26414	0.37757	0.29863	0.41034	0.43239	0.40641	0.41198	0.50681	0.49354	0.49407	0.37788	0.27316	0.08813	0.04967	0.24484	0.3118	0.36257	0.42915	0.01012	0.13151	0.15749	0.2877	0.21134	0.07095	0.27244	0.362	0.52352	0.52606	0.53178	0.65673	0.62282	0.52259	0.48945	0.5296	0.58198	0.52732	0.49486	0.53026
VVD1	0.28004	0.3294	0.29128	0.34493	0.44721	0.43728	0.08212	0.01014	0.01446	0.17822	0.13158	0.17437	0.24855	0.17805	0.27198	0.28238	0.26824	0.26133	0.3899	0.39485	0.40545	0.31193	0.23374	0.06758	0.02972	0.19017	0.19874	0.24023	0.38243	0.01132	0.09658	0.27166	0.4199	0.31601	0.16329	0.27653	0.37757	0.55508	0.57678	0.51474	0.622	0.5422	0.43981	0.38263	0.39708	0.4519	0.40442	0.35038	0.36738
VVD1	0.34852	0.41195	0.40457	0.48919	0.55251	0.53276	0.25188	0.14356	0.12845	0.21651	0.10546	0.11231	0.16103	0.05715	0.15334	0.15848	0.13094	0.13927	0.30845	0.33426	0.36438	0.2512	0.19803	0.01899	0.04748	0.17365	0.12435	0.1439	0.22128	0.1266	0.18543	0.20809	0.4252	0.31699	0.20587	0.24317	0.36659	0.48641	0.52208	0.42411	0.50066	0.39538	0.27949	0.20967	0.21153	0.26842	0.23454	0.16044	0.17157
VVD1	0.44955	0.52628	0.53815	0.63516	0.67166	0.63834	0.41471	0.28947	0.2612	0.30951	0.16094	0.13797	0.15807	0.04002	0.12681	0.11167	0.07314	0.07658	0.27352	0.32394	0.37942	0.27823	0.24915	0.07098	0.03097	0.08043	0.00269	0.01146	0.06137	0.25749	0.30874	0.13456	0.41495	0.25314	0.17236	0.1925	0.32837	0.44918	0.48184	0.31683	0.42321	0.31046	0.20154	0.13366	0.11514	0.17247	0.15662	0.06196	0.05839
VVD1	0.51443	0.58892	0.56298	0.62736	0.71274	0.69617	0.36123	0.23549	0.20739	0.33355	0.24962	0.26082	0.28475	0.21583	0.28509	0.23952	0.24298	0.20818	0.36956	0.38534	0.44213	0.40445	0.35967	0.21624	0.13165	0.0149	0.00405	0.03484	0.12599	0.26105	0.37374	0.19049	0.48131	0.20165	0.05211	0.21588	0.34712	0.59413	0.61806	0.39779	0.6233	0.54527	0.47111	0.41802	0.38832	0.44206	0.43243	0.33556	0.31249
VVD1	0.61617	0.67553	0.63284	0.65353	0.72684	0.67168	0.42589	0.31691	0.2218	0.29947	0.21284	0.20673	0.19308	0.17674	0.20333	0.13996	0.1903	0.12411	0.26957	0.27335	0.32494	0.35628	0.33166	0.25428	0.19221	0.07864	0.10456	0.07917	0.10259	0.20167	0.3333	0.30392	0.57979	0.22968	0.04157	0.20122	0.31087	0.63777	0.67437	0.37194	0.65378	0.55186	0.50824	0.44846	0.38644	0.43013	0.42808	0.31582	0.25996
VVD1	0.63282	0.67405	0.60639	0.58286	0.65401	0.58324	0.41098	0.33454	0.21794	0.28275	0.22435	0.21783	0.1798	0.22138	0.20026	0.12664	0.21875	0.11922	0.22777	0.22322	0.26899	0.36955	0.35603	0.34163	0.29271	0.20012	0.20468	0.16987	0.09077	0.10428	0.26247	0.38543	0.60602	0.20633	0.01855	0.16125	0.25511	0.6547	0.69392	0.38461	0.69884	0.60982	0.60464	0.54073	0.46658	0.50018	0.50106	0.39488	0.32405
VVD1	0.56595	0.58138	0.48527	0.42871	0.50487	0.43929	0.29677	0.23572	0.10199	0.17249	0.16156	0.17355	0.13456	0.22763	0.17685	0.11074	0.24115	0.12856	0.18571	0.15459	0.1745	0.31583	0.29458	0.33583	0.28525	0.21271	0.19611	0.15488	0.16597	0.03357	0.12525	0.47486	0.61264	0.22115	0.03052	0.17472	0.24736	0.6656	0.70265	0.45394	0.76249	0.69006	0.70343	0.63319	0.56662	0.5881	0.5813	0.49456	0.41964
VVD1	0.6048	0.61814	0.5171	0.44892	0.52255	0.46558	0.31363	0.22196	0.07237	0.14103	0.14773	0.16704	0.11988	0.23302	0.17288	0.08646	0.23474	0.11236	0.14675	0.09686	0.12386	0.29674	0.27994	0.35213	0.29669	0.23867	0.21389	0.17611	0.1057	0.04968	0.19141	0.45336	0.62215	0.18571	0.06923	0.18373	0.25056	0.6734	0.71029	0.44283	0.78734	0.73012	0.76206	0.69464	0.62362	0.63368	0.64105	0.55176	0.4623
VVD1	0.63806	0.63098	0.51994	0.41781	0.47305	0.37228	0.37265	0.35572	0.19438	0.20889	0.21931	0.21005	0.10511	0.26723	0.14331	0.0327	0.20824	0.0428	0.05665	0.03426	0.07129	0.32408	0.34764	0.48549	0.46779	0.44172	0.40734	0.36684	0.01206	0.01637	0.15109	0.48047	0.59302	0.09661	0.17833	0.01484	0.09623	0.58536	0.63765	0.30781	0.6515	0.61804	0.70761	0.65143	0.5554	0.56514	0.58692	0.50009	0.39654
VVD1	0.61564	0.59667	0.48128	0.35985	0.41774	0.32676	0.33842	0.3273	0.1676	0.19053	0.23192	0.23114	0.11453	0.30074	0.15977	0.03218	0.21974	0.04199	0.02109	0.01261	0.02848	0.31721	0.34798	0.52157	0.50135	0.48286	0.42595	0.3826	0.05024	0.00128	0.16635	0.45922	0.55493	0.0325	0.23865	0.01263	0.04848	0.53136	0.59889	0.26189	0.62705	0.62118	0.73912	0.69855	0.60021	0.60011	0.63272	0.556	0.44311
VVD1	0.61206	0.58987	0.48494	0.35318	0.39032	0.28443	0.37983	0.38826	0.21109	0.19598	0.21959	0.19976	0.06866	0.26312	0.10336	0.02066	0.17207	0.00799	0.03101	0.0569	0.01794	0.28356	0.32929	0.5215	0.52505	0.52924	0.4915	0.45455	0.10318	0.02681	0.1392	0.44442	0.52204	0.01007	0.2483	0.06951	0.02439	0.46785	0.53067	0.1735	0.52566	0.50433	0.63325	0.59875	0.48592	0.47984	0.51444	0.4363	0.31345
VVD1	0.71116	0.69428	0.60519	0.47989	0.49577	0.36236	0.50512	0.50517	0.32592	0.27014	0.26201	0.21779	0.05405	0.23009	0.06571	0.08358	0.09531	0.0888	0.08726	0.08868	0.02248	0.28635	0.35946	0.54958	0.57489	0.58961	0.5742	0.5475	0.22069	0.07791	0.24457	0.39737	0.52616	0.02749	0.25127	0.10341	0.04603	0.41997	0.50286	0.07544	0.44945	0.4363	0.57349	0.53674	0.41049	0.41297	0.46846	0.37609	0.24919
VVD1	0.76216	0.75002	0.67792	0.57196	0.55675	0.39082	0.60686	0.60524	0.41735	0.30363	0.24327	0.17133	0.00867	0.14412	0.01767	0.16415	0.00277	0.17414	0.13664	0.11582	0.04039	0.25342	0.34229	0.51658	0.57406	0.60904	0.638	0.62155	0.28722	0.10359	0.25112	0.39972	0.55062	0.00723	0.19621	0.12293	0.04002	0.39546	0.48644	0.04596	0.38075	0.34907	0.46955	0.41375	0.28361	0.29586	0.3553	0.25209	0.12931
VVD1	0.72332	0.70703	0.6445	0.52576	0.49908	0.32513	0.60114	0.62209	0.41104	0.26551	0.18391	0.093	0.0852	0.06352	0.10052	0.22495	0.05811	0.22266	0.17902	0.1572	0.09635	0.18266	0.27544	0.45081	0.52733	0.58074	0.63127	0.6223	0.27503	0.04347	0.1725	0.42117	0.54563	0.05669	0.14331	0.12872	0.06791	0.357	0.44807	0.017	0.31176	0.2403	0.35374	0.30077	0.16557	0.17063	0.21993	0.11579	0.01009
VVD1	0.73685	0.71833	0.65773	0.53122	0.50579	0.32638	0.60721	0.63756	0.42885	0.28613	0.2166	0.12366	0.06528	0.08939	0.0828	0.22044	0.05414	0.22754	0.19402	0.16754	0.09999	0.19456	0.29739	0.48527	0.56241	0.61475	0.65716	0.64828	0.30217	0.05871	0.21113	0.38587	0.51521	0.01389	0.17833	0.16054	0.11418	0.32721	0.41798	0.04584	0.27269	0.21168	0.34066	0.30079	0.15721	0.1625	0.21942	0.11531	0.01575
VVD1	0.77022	0.76704	0.71799	0.62102	0.58872	0.41492	0.68131	0.69892	0.51671	0.37612	0.28943	0.19149	0.00303	0.13545	0.02734	0.17483	0.02466	0.19667	0.14296	0.09961	0.01595	0.26828	0.37337	0.53418	0.61409	0.6562	0.70227	0.69191	0.37604	0.14871	0.31479	0.2975	0.47361	0.05246	0.22303	0.20569	0.13414	0.30417	0.39168	0.08785	0.23573	0.19439	0.31934	0.27986	0.13354	0.14908	0.21594	0.10638	0.01886
VVD1	0.766	0.7643	0.73331	0.64846	0.59527	0.39995	0.73037	0.76333	0.5757	0.39124	0.25973	0.13718	0.05768	0.04711	0.10735	0.23769	0.10871	0.26541	0.18069	0.11539	0.02993	0.22374	0.33921	0.47636	0.58226	0.63684	0.71939	0.71726	0.39485	0.12671	0.26468	0.31279	0.48188	0.00149	0.15083	0.2159	0.13357	0.26324	0.36051	0.11777	0.15119	0.07815	0.18188	0.13405	0.01261	0.00898	0.07012	0.04587	0.16248
VVD1	0.73507	0.73248	0.70595	0.61278	0.55272	0.35831	0.70602	0.73707	0.52753	0.32906	0.1917	0.06721	0.12014	0.0151	0.16454	0.28135	0.15133	0.29661	0.21633	0.15933	0.08442	0.15715	0.26825	0.40868	0.51945	0.58662	0.6855	0.69071	0.36718	0.0906	0.21052	0.33201	0.48542	0.04657	0.09997	0.17776	0.12212	0.26005	0.34851	0.12382	0.13347	0.03375	0.12858	0.0803	0.0674	0.05536	0.00222	0.11792	0.23926
VVD1	0.68872	0.6909	0.66538	0.58019	0.51905	0.33845	0.67464	0.7042	0.4977	0.30617	0.16199	0.04327	0.12055	0.02446	0.16232	0.25293	0.12713	0.25981	0.17284	0.11841	0.05828	0.1565	0.25042	0.3704	0.47958	0.54065	0.64853	0.65077	0.30683	0.03098	0.15095	0.34051	0.4766	0.08463	0.06093	0.15361	0.1079	0.27676	0.35241	0.06917	0.1626	0.04299	0.11594	0.05882	0.07925	0.06686	0.0314	0.14365	0.25703
VVD1	0.61669	0.6231	0.58674	0.49662	0.4465	0.30095	0.57676	0.58021	0.36253	0.1977	0.07591	0.01698	0.14125	0.03492	0.1564	0.21989	0.08084	0.19678	0.12852	0.10597	0.07654	0.11733	0.17806	0.29654	0.38694	0.44679	0.55173	0.55266	0.20764	0.02095	0.08873	0.35271	0.46996	0.12212	0.03403	0.08189	0.05926	0.32752	0.38018	0.017	0.24872	0.11805	0.17289	0.10949	0.01759	0.01755	0.00112	0.10333	0.2166
VVD1	0.60815	0.6166	0.56852	0.47834	0.44668	0.32983	0.50843	0.4609	0.23166	0.09649	0.00514	0.0693	0.16525	0.05849	0.15467	0.21171	0.06588	0.16756	0.10954	0.12159	0.10471	0.06996	0.10582	0.21939	0.28408	0.33593	0.43719	0.4391	0.12494	0.00454	0.09382	0.38137	0.5163	0.18128	0.01425	0.02605	0.04491	0.41477	0.46368	0.14918	0.39255	0.25587	0.28755	0.21181	0.10035	0.09465	0.10483	0.00131	0.10932
VVD1	0.53831	0.55263	0.52632	0.45987	0.41035	0.29313	0.51003	0.4745	0.25379	0.0891	0.04766	0.12853	0.21437	0.14621	0.22344	0.25154	0.13823	0.20965	0.12332	0.11556	0.10433	0.01379	0.05089	0.12731	0.20971	0.26554	0.39977	0.41171	0.10985	0.02837	0.03074	0.35993	0.47377	0.2286	0.09981	0.03837	0.05311	0.35195	0.39497	0.1083	0.29249	0.12802	0.12852	0.04912	0.05352	0.05515	0.05572	0.1583	0.25348
VVD1	0.60051	0.61667	0.60124	0.54601	0.49266	0.33913	0.59388	0.59279	0.39331	0.22602	0.06617	0.03651	0.14901	0.0956	0.18144	0.2293	0.13266	0.22136	0.10638	0.06249	0.02429	0.10307	0.16242	0.21973	0.30915	0.34822	0.47969	0.48677	0.16284	0.01126	0.07484	0.35102	0.48353	0.20089	0.07154	0.02375	0.01436	0.33448	0.38737	0.03763	0.22183	0.05998	0.07536	0.00507	0.11071	0.09787	0.08761	0.19893	0.2944
VVD1	0.71467	0.73448	0.70136	0.64268	0.62454	0.47359	0.61681	0.58099	0.38099	0.26427	0.12591	0.0422	0.07233	0.01253	0.08944	0.16975	0.06052	0.16997	0.05131	0.02146	0.03407	0.18338	0.23574	0.29145	0.34629	0.35484	0.45739	0.45558	0.14211	0.08093	0.1928	0.3893	0.58344	0.20272	0.03364	0.02615	0.09695	0.46733	0.5324	0.14446	0.39366	0.24714	0.26913	0.1965	0.079	0.09879	0.11892	0.00477	0.10718
VVD1	0.67588	0.69343	0.65149	0.58964	0.58495	0.44798	0.51854	0.45278	0.24669	0.15143	0.03143	0.02658	0.11396	0.05794	0.11088	0.1744	0.0667	0.15729	0.0464	0.04102	0.00304	0.11726	0.14752	0.19316	0.22727	0.22761	0.33109	0.32971	0.027	0.04375	0.1304	0.44958	0.63079	0.2924	0.11822	0.14222	0.20408	0.53227	0.59313	0.25924	0.50112	0.34725	0.34072	0.25558	0.15747	0.17317	0.17996	0.06109	0.03279
VVD1	0.65028	0.68404	0.65513	0.62783	0.63632	0.51935	0.49679	0.39964	0.21505	0.15019	0.01775	0.02863	0.08734	0.07885	0.08592	0.13759	0.06373	0.12626	0.01342	0.02168	0.06248	0.12009	0.13037	0.11633	0.12618	0.09942	0.2098	0.214	0.0328	0.09848	0.16718	0.41546	0.63332	0.33783	0.18078	0.21402	0.29176	0.5598	0.61482	0.29641	0.52163	0.35986	0.3149	0.23067	0.14922	0.17317	0.17322	0.05218	0.02522
VVD1	0.65121	0.7073	0.68057	0.6902	0.71437	0.62737	0.55245	0.46579	0.31965	0.30213	0.16777	0.12152	0.07811	0.07425	0.06929	0.01314	0.08125	0.01	0.16493	0.18669	0.2325	0.2893	0.2916	0.24385	0.23837	0.18036	0.26486	0.25384	0.02146	0.17531	0.29216	0.29663	0.55863	0.21429	0.04557	0.11027	0.2193	0.54988	0.59061	0.24263	0.49592	0.36723	0.33344	0.26849	0.18031	0.21555	0.21944	0.09632	0.02268
VVD1	0.64076	0.70686	0.70798	0.75265	0.7813	0.69701	0.57715	0.48559	0.39039	0.39416	0.23807	0.18195	0.13819	0.07441	0.10321	0.03869	0.05091	0.000981	0.19074	0.23553	0.31276	0.31838	0.33076	0.22814	0.21524	0.13049	0.20843	0.20173	0.06838	0.2897	0.39229	0.19983	0.5107	0.19762	0.07719	0.1243	0.24773	0.50366	0.54488	0.19853	0.42382	0.2927	0.24438	0.18818	0.1123	0.16331	0.17496	0.04893	0.00398
VVD1	0.70785	0.77024	0.76779	0.79769	0.8181	0.72873	0.66669	0.58424	0.48484	0.47706	0.32527	0.25253	0.17619	0.13303	0.12958	0.03436	0.0615	0.0156	0.16346	0.21963	0.31691	0.376	0.41206	0.34534	0.34411	0.27248	0.33514	0.32668	0.19047	0.35011	0.47536	0.16937	0.49995	0.10724	0.01845	0.0435	0.16418	0.47265	0.5215	0.11546	0.38816	0.27453	0.26452	0.21806	0.12285	0.17066	0.20052	0.06932	0.000942
VVD1	0.69185	0.7588	0.79304	0.84595	0.82326	0.71516	0.72823	0.62683	0.51458	0.44119	0.24051	0.14186	0.06127	0.02265	0.00414	0.08932	0.09644	0.14362	0.06205	0.13791	0.24202	0.25543	0.30555	0.21631	0.24808	0.2096	0.33229	0.34854	0.26908	0.40874	0.4813	0.09562	0.44934	0.13333	0.07624	0.04198	0.16149	0.36063	0.41375	0.02288	0.22234	0.08565	0.05136	0.00173	0.09386	0.04692	0.01145	0.14841	0.21181
VVD1	0.7444	0.78597	0.80973	0.81884	0.76599	0.60961	0.78805	0.72637	0.5624	0.4113	0.20694	0.08167	0.0541	0.08403	0.12506	0.22592	0.19617	0.27616	0.0948	0.01105	0.09512	0.18427	0.26941	0.25872	0.33406	0.34753	0.49103	0.51216	0.34176	0.30891	0.38165	0.19917	0.49533	0.13829	0.06453	0.02423	0.07523	0.31906	0.39431	0.04149	0.16231	0.01312	0.01534	0.0448	0.16087	0.12345	0.08053	0.22064	0.30717
VVD1	0.81143	0.84325	0.84374	0.83074	0.79965	0.62709	0.80412	0.77582	0.62077	0.49714	0.32327	0.19985	0.03153	0.03978	0.03886	0.17431	0.11708	0.23764	0.07746	0.00745	0.12807	0.28502	0.38636	0.41383	0.48009	0.48181	0.58149	0.58839	0.37806	0.31129	0.42787	0.22682	0.51987	0.06293	0.05119	0.10296	0.02313	0.33593	0.43192	0.06146	0.19036	0.08353	0.12708	0.07982	0.0507	0.00792	0.05047	0.08838	0.18529
VVD1	0.7745	0.82478	0.84782	0.87137	0.83731	0.68172	0.80871	0.75894	0.63136	0.52153	0.32965	0.20738	0.06319	0.0243	0.01564	0.14091	0.12058	0.21406	0.02736	0.06923	0.19477	0.29323	0.38507	0.36111	0.41753	0.4034	0.51344	0.52603	0.3926	0.4026	0.50423	0.12111	0.45913	0.04908	0.02613	0.08629	0.05202	0.30974	0.39203	0.08921	0.13443	0.02543	0.04783	0.00703	0.1117	0.06445	0.0066	0.14583	0.22818
VVD1	0.7655	0.80711	0.83994	0.85265	0.79079	0.61609	0.82537	0.77883	0.62414	0.45985	0.24741	0.10924	0.04625	0.08073	0.12905	0.24599	0.22272	0.30981	0.1253	0.02558	0.09412	0.19284	0.29507	0.28997	0.37474	0.39368	0.53809	0.5638	0.41499	0.36492	0.44004	0.14212	0.45969	0.08815	0.03166	0.08652	0.03349	0.25808	0.34459	0.12829	0.06419	0.06465	0.04707	0.09752	0.21901	0.17698	0.12005	0.26144	0.34787
VVD1	0.7766	0.80554	0.83234	0.81745	0.74661	0.55444	0.82294	0.79509	0.6177	0.42762	0.22193	0.07817	0.09602	0.10204	0.17551	0.29783	0.25498	0.35567	0.18954	0.0931	0.02419	0.15646	0.26932	0.30135	0.40094	0.43939	0.58568	0.61282	0.42301	0.30717	0.38629	0.19317	0.47764	0.09482	0.0263	0.10207	0.00262	0.24853	0.3352	0.15184	0.04896	0.08412	0.04826	0.09977	0.23111	0.19598	0.13607	0.2771	0.37468
VVD1	0.8012	0.80978	0.84484	0.8074	0.71445	0.47533	0.78805	0.74805	0.53646	0.29429	0.07944	0.06857	0.26238	0.27267	0.33586	0.46488	0.4333	0.52279	0.35866	0.26466	0.13733	0.01805	0.10922	0.16011	0.27609	0.3415	0.52023	0.56282	0.38115	0.26965	0.29441	0.30772	0.57268	0.23776	0.18741	0.01971	0.09469	0.25496	0.3596	0.11116	0.05393	0.10978	0.08744	0.15748	0.28024	0.24904	0.18688	0.33103	0.42877
VVD1	0.70705	0.74982	0.78632	0.79925	0.7345	0.59897	0.76625	0.67879	0.50664	0.34962	0.13943	0.01842	0.0982	0.13436	0.15814	0.25075	0.22381	0.28648	0.11049	0.04134	0.05805	0.12686	0.19849	0.1868	0.26081	0.28688	0.44303	0.4702	0.33597	0.3348	0.37865	0.16102	0.46996	0.14442	0.09513	0.01387	0.0895	0.29413	0.35223	0.03996	0.15149	0.01082	0.02273	0.08657	0.19377	0.16606	0.12626	0.26799	0.35881
VVD1	0.61255	0.66534	0.72623	0.7715	0.69716	0.56036	0.72267	0.63943	0.49523	0.32584	0.09017	0.03612	0.13127	0.22384	0.21057	0.27252	0.29273	0.31764	0.11207	0.02197	0.07435	0.06308	0.13109	0.0607	0.14367	0.16203	0.34399	0.38374	0.29715	0.32005	0.33369	0.10784	0.40838	0.20772	0.20477	0.05301	0.13403	0.23724	0.28691	0.0549	0.05179	0.12546	0.17631	0.2434	0.33082	0.29364	0.26491	0.39796	0.46031
VVD1	0.46317	0.53843	0.63314	0.72631	0.66048	0.56872	0.59334	0.46569	0.37087	0.23883	0.00345	0.10495	0.13654	0.30775	0.21425	0.23506	0.3236	0.27873	0.05173	0.03027	0.11217	0.02165	0.01329	0.14254	0.08781	0.09349	0.10281	0.15441	0.21737	0.40601	0.36594	0.05055	0.2848	0.24426	0.33074	0.16862	0.24689	0.18084	0.20617	0.03257	0.01248	0.19172	0.30319	0.35888	0.41071	0.37494	0.35459	0.47303	0.49867
VVD1	0.36189	0.43236	0.53543	0.64713	0.56258	0.47331	0.55028	0.44255	0.37153	0.22248	0.02683	0.13292	0.15592	0.3359	0.24068	0.23815	0.34391	0.28247	0.05751	0.03846	0.10933	0.04951	0.01673	0.18691	0.11705	0.11175	0.09367	0.14738	0.22086	0.35169	0.28801	0.08184	0.20083	0.22622	0.33519	0.1202	0.20313	0.08956	0.10951	0.06938	0.11796	0.29198	0.41114	0.46688	0.50305	0.46481	0.45444	0.55609	0.56143
VVD1	0.47625	0.54865	0.64204	0.74372	0.69584	0.60159	0.53303	0.37488	0.29371	0.20003	0.02707	0.10751	0.12697	0.31664	0.19282	0.2209	0.32757	0.27011	0.03991	0.02946	0.1183	0.04009	0.01577	0.19588	0.17106	0.20101	0.01533	0.0369	0.14935	0.44997	0.38932	0.02479	0.32986	0.29502	0.39025	0.2701	0.36197	0.23661	0.27057	0.04228	0.06335	0.10935	0.23587	0.29389	0.32895	0.28884	0.2671	0.38249	0.39619
VVD1	0.56288	0.64661	0.71325	0.8109	0.81304	0.73628	0.53536	0.36467	0.29795	0.28136	0.08777	0.03252	0.01833	0.15484	0.03255	0.08664	0.17034	0.14015	0.0863	0.14126	0.23867	0.10939	0.11955	0.06357	0.08515	0.1621	0.02702	0.00725	0.11251	0.5172	0.51174	0.01119	0.39618	0.25135	0.28399	0.26851	0.39364	0.36384	0.40361	0.10894	0.21993	0.07934	0.03092	0.07788	0.12052	0.07187	0.04348	0.16672	0.18815
VVD1	0.57295	0.65679	0.71047	0.80602	0.80313	0.71641	0.61041	0.50437	0.45409	0.42871	0.22797	0.15118	0.11369	0.03081	0.0452	0.01355	0.07505	0.07941	0.14737	0.2326	0.33171	0.25107	0.27562	0.10837	0.10711	0.03094	0.14799	0.16636	0.18897	0.4531	0.50531	0.01952	0.34857	0.13835	0.13294	0.08277	0.23517	0.31678	0.35875	0.02481	0.14909	0.02932	0.04839	0.08559	0.14672	0.08799	0.05951	0.18069	0.20561
VVD1	0.76438	0.82849	0.8634	0.9047	0.90358	0.7587	0.71696	0.62532	0.52802	0.47981	0.29516	0.20322	0.09957	0.00913	0.03208	0.08313	0.10308	0.16451	0.04405	0.13219	0.26081	0.2826	0.34559	0.25366	0.26571	0.20197	0.30822	0.32199	0.26801	0.46581	0.56062	0.09438	0.48053	0.12915	0.08508	0.06412	0.21509	0.38711	0.46225	0.00602	0.22446	0.112	0.08815	0.04893	0.04454	0.01234	0.06553	0.07336	0.13252
VVD1	0.73026	0.80643	0.84995	0.90511	0.90264	0.78896	0.70852	0.58969	0.49389	0.45065	0.26052	0.17375	0.09441	0.01249	0.02947	0.07297	0.10009	0.14163	0.0694	0.14493	0.26407	0.25842	0.30861	0.20217	0.20826	0.14622	0.25966	0.27841	0.27148	0.51878	0.59796	0.02708	0.44281	0.12253	0.09576	0.08817	0.22666	0.37916	0.43813	0.00427	0.21856	0.10027	0.0607	0.02355	0.06585	0.01515	0.03557	0.10487	0.16392
VVD1	0.71229	0.78865	0.82929	0.88557	0.86979	0.75888	0.75197	0.65999	0.56638	0.50242	0.30749	0.20548	0.11005	0.02192	0.03468	0.06906	0.08215	0.13709	0.06704	0.15367	0.27125	0.29332	0.35534	0.26955	0.29401	0.24965	0.36129	0.37864	0.35106	0.50711	0.59532	0.00545	0.38977	0.0446	0.00609	0.02509	0.11608	0.3127	0.36694	0.081	0.13137	0.02605	0.00705	0.02282	0.1221	0.07226	0.0194	0.15689	0.22178
VVD1	0.70207	0.77134	0.8098	0.86312	0.83735	0.73072	0.79243	0.72835	0.64533	0.57083	0.38172	0.26726	0.15139	0.08057	0.06381	0.05012	0.05603	0.12885	0.06318	0.16281	0.28696	0.34653	0.42513	0.36535	0.40342	0.3703	0.46593	0.47593	0.43477	0.49954	0.60245	0.03743	0.34142	0.03635	0.0813	0.12811	0.01857	0.25305	0.31743	0.13486	0.07288	0.0221	0.01112	0.03381	0.14139	0.09436	0.0359	0.16892	0.24017
VVD1	0.65568	0.73129	0.7665	0.82828	0.83972	0.76659	0.73369	0.68305	0.65182	0.64782	0.48856	0.39015	0.28742	0.19858	0.19566	0.07534	0.04911	0.02376	0.16512	0.26576	0.40135	0.44751	0.51942	0.43069	0.4325	0.35673	0.39884	0.39768	0.40374	0.53709	0.66426	0.09445	0.29093	0.09814	0.14765	0.13401	0.01323	0.25777	0.31484	0.14515	0.09764	0.02579	0.04631	0.04654	0.05371	0.00014	0.05891	0.06602	0.12562
VVD1	0.54037	0.63008	0.67416	0.77138	0.8093	0.78661	0.62677	0.55705	0.58417	0.6511	0.5189	0.44855	0.39051	0.26509	0.30584	0.19883	0.13543	0.09105	0.28052	0.3733	0.50499	0.49329	0.53722	0.39379	0.35805	0.24568	0.25519	0.25006	0.34812	0.59035	0.71081	0.20463	0.19432	0.13571	0.16145	0.10266	0.05135	0.23782	0.27642	0.11404	0.09853	0.05242	0.05148	0.06773	0.00586	0.05264	0.10513	0.00441	0.03834
VVD1	0.47954	0.5778	0.62945	0.75182	0.79967	0.80637	0.56646	0.45566	0.49573	0.5823	0.4475	0.39432	0.36805	0.20721	0.28814	0.20092	0.11287	0.10007	0.30111	0.38354	0.50903	0.43716	0.45943	0.27646	0.22343	0.09729	0.11517	0.11665	0.2694	0.61401	0.70066	0.22132	0.1945	0.06841	0.08158	0.01642	0.13975	0.25323	0.29376	0.04239	0.1383	0.08152	0.0419	0.05168	0.00112	0.06051	0.09995	0.00586	0.02354
VVD1	0.34043	0.44582	0.48623	0.62528	0.70708	0.7746	0.41866	0.30992	0.41473	0.588	0.50807	0.49224	0.51127	0.34837	0.44529	0.37514	0.27963	0.27722	0.45061	0.51794	0.62469	0.53192	0.52245	0.3148	0.21934	0.0568	0.01544	0.000409	0.20104	0.60426	0.70873	0.31345	0.07553	0.16289	0.17654	0.03475	0.12232	0.2379	0.24974	0.000621	0.17662	0.16973	0.13181	0.15998	0.13408	0.19309	0.22412	0.14431	0.14757
VVD1	0.39346	0.48858	0.5119	0.62696	0.71348	0.76055	0.44377	0.36953	0.47255	0.64559	0.57934	0.55736	0.55163	0.42224	0.48394	0.39499	0.3251	0.29075	0.4497	0.52336	0.63786	0.59855	0.60387	0.42871	0.33906	0.17545	0.11129	0.08401	0.22082	0.55953	0.70311	0.26324	0.10147	0.20187	0.24604	0.09487	0.06969	0.25261	0.27183	0.01276	0.19695	0.21277	0.20579	0.23737	0.19711	0.25958	0.29873	0.21927	0.21276
VVD1	0.53752	0.63179	0.65762	0.7607	0.83022	0.82504	0.55514	0.45632	0.49106	0.59955	0.48948	0.4475	0.41176	0.28026	0.341	0.24263	0.18182	0.14213	0.33215	0.41221	0.53787	0.50275	0.52339	0.36114	0.29384	0.1514	0.14372	0.1325	0.22167	0.56762	0.68814	0.12994	0.27158	0.06015	0.12037	0.00638	0.1607	0.34517	0.38654	0.02614	0.25676	0.21846	0.19564	0.20134	0.14386	0.20677	0.24826	0.14031	0.11428
VVD1	0.39436	0.50027	0.53473	0.6652	0.75317	0.79788	0.41842	0.29713	0.3763	0.5399	0.44858	0.43532	0.45254	0.28609	0.39269	0.32555	0.23345	0.23217	0.41931	0.48286	0.59112	0.48594	0.47293	0.26109	0.16365	0.00479	0.02802	0.04057	0.12778	0.57423	0.67068	0.21535	0.17896	0.05913	0.08637	0.05854	0.21474	0.32295	0.33736	0.08214	0.26529	0.23629	0.17993	0.1921	0.16721	0.22861	0.25386	0.16566	0.16672
VVD1	0.27756	0.37917	0.39093	0.51933	0.64034	0.73069	0.27883	0.18543	0.32296	0.56295	0.53351	0.55306	0.59499	0.45064	0.54769	0.48682	0.40425	0.39425	0.54041	0.58896	0.6823	0.59189	0.56061	0.35317	0.22199	0.02524	0.06806	0.10339	0.07133	0.52556	0.6567	0.26686	0.07442	0.16852	0.21531	0.00305	0.15438	0.29881	0.29609	0.11121	0.30111	0.33148	0.29531	0.32841	0.32119	0.38147	0.40229	0.34229	0.35837
VVD1	0.40598	0.49687	0.49102	0.58947	0.70991	0.7581	0.35816	0.28007	0.37962	0.59449	0.55837	0.56577	0.56978	0.45622	0.52114	0.43725	0.38538	0.3418	0.49143	0.54724	0.65206	0.61358	0.60085	0.42808	0.31002	0.11997	0.03068	0.00879	0.07892	0.48253	0.63805	0.13684	0.20495	0.11646	0.21103	0.00167	0.1668	0.38475	0.40594	0.1449	0.37948	0.39748	0.38241	0.40262	0.3752	0.43998	0.46654	0.38999	0.38684
VVD1	0.4648	0.55895	0.56918	0.6736	0.77933	0.80315	0.39912	0.27621	0.33118	0.50716	0.43262	0.43301	0.43782	0.29685	0.39134	0.31292	0.24479	0.22382	0.40546	0.45964	0.56891	0.4896	0.47408	0.28246	0.17225	0.00662	0.0406	0.06114	0.04562	0.50982	0.61668	0.07077	0.30702	0.02675	0.04691	0.12998	0.29334	0.43924	0.47137	0.1947	0.41039	0.37379	0.32076	0.31949	0.29234	0.35515	0.37781	0.28383	0.27756
VVD1	0.29755	0.39377	0.40308	0.52875	0.65355	0.72909	0.23978	0.11591	0.23318	0.47151	0.43755	0.47013	0.51685	0.35937	0.47919	0.42316	0.33116	0.33384	0.48999	0.53134	0.62673	0.50623	0.46651	0.24673	0.10611	0.09592	0.16925	0.19656	0.02559	0.48999	0.5896	0.16549	0.17122	0.03509	0.08256	0.13137	0.285	0.37621	0.38413	0.22244	0.39479	0.39706	0.33239	0.3461	0.35096	0.4122	0.42346	0.35982	0.38224
VVD1	0.24082	0.32809	0.31575	0.4235	0.56883	0.6657	0.12867	0.01489	0.15565	0.43367	0.45366	0.5157	0.57395	0.45242	0.55883	0.49975	0.42822	0.41739	0.52976	0.54978	0.63293	0.54203	0.49033	0.29911	0.13643	0.07527	0.19624	0.23566	0.0703	0.45283	0.57578	0.17052	0.12868	0.09934	0.16764	0.1091	0.25877	0.38604	0.38924	0.26945	0.4617	0.50825	0.46351	0.48556	0.50008	0.55689	0.56876	0.52268	0.54915
VVD1	0.37839	0.45515	0.43739	0.51292	0.65238	0.69198	0.18977	0.06407	0.13485	0.35771	0.35446	0.40129	0.42584	0.31005	0.41521	0.34034	0.27866	0.26057	0.39706	0.4162	0.50891	0.42767	0.39185	0.22567	0.07559	0.11792	0.19996	0.22716	0.10558	0.4311	0.52402	0.01277	0.32286	0.06711	0.02544	0.22337	0.3762	0.49643	0.53582	0.32398	0.54511	0.5451	0.49052	0.48764	0.4909	0.54957	0.56268	0.49299	0.50352
VVD1	0.33799	0.42166	0.41713	0.513	0.64551	0.70308	0.17386	0.01273	0.08156	0.30006	0.2792	0.33084	0.37744	0.23308	0.36761	0.30876	0.23064	0.24124	0.39107	0.40404	0.48868	0.36247	0.31316	0.11913	0.03514	0.22254	0.27796	0.29634	0.12985	0.45617	0.50727	0.01026	0.3153	0.11978	0.05315	0.28431	0.43586	0.47952	0.51732	0.35674	0.53107	0.51202	0.42724	0.41596	0.43066	0.48442	0.49147	0.42303	0.43971
VVD1	0.13251	0.2116	0.20271	0.31774	0.46325	0.57534	0.01283	0.15971	0.02233	0.24887	0.27793	0.3631	0.45668	0.31183	0.46113	0.43134	0.33682	0.3698	0.47732	0.47673	0.53658	0.38096	0.30551	0.09506	0.08039	0.28064	0.38029	0.41065	0.18868	0.40879	0.45579	0.1217	0.13634	0.02343	0.01715	0.25138	0.38877	0.38481	0.38914	0.3716	0.49443	0.52953	0.44248	0.44568	0.49361	0.54379	0.54144	0.51087	0.55941
VVD1	0.08709	0.13854	0.10101	0.17943	0.33334	0.43199	0.121	0.22732	0.08342	0.19342	0.26985	0.3703	0.45043	0.35555	0.47328	0.43737	0.367	0.37558	0.43559	0.4268	0.47669	0.36945	0.29994	0.1424	0.03166	0.22617	0.36193	0.40582	0.24536	0.27212	0.33402	0.0231	0.13921	0.0153	0.05145	0.23514	0.36277	0.38215	0.39203	0.42029	0.54392	0.61428	0.55498	0.55512	0.61171	0.65907	0.65391	0.64512	0.69914
VVD1	0.11596	0.05783	0.08934	0.01134	0.16677	0.3264	0.23306	0.29557	0.08333	0.23656	0.34512	0.45786	0.58298	0.49226	0.60638	0.60384	0.52621	0.55139	0.57809	0.56396	0.58337	0.4645	0.37267	0.19764	0.01836	0.18331	0.36412	0.42283	0.21732	0.24971	0.33679	0.21692	0.10311	0.16842	0.20668	0.10242	0.20703	0.2358	0.19464	0.31708	0.40374	0.52689	0.48684	0.51874	0.58847	0.62902	0.61869	0.64383	0.71629
VVD1	0.01573	0.06362	0.00621	0.07465	0.24346	0.37	0.14684	0.18168	0.00758	0.33107	0.45714	0.55921	0.63311	0.58993	0.65327	0.60652	0.57016	0.54045	0.55513	0.5461	0.58772	0.55617	0.49117	0.36866	0.19469	0.00909	0.21766	0.28778	0.16176	0.24399	0.3828	0.13087	0.00986	0.20976	0.31033	0.02945	0.15214	0.2992	0.28735	0.29488	0.46589	0.60578	0.61507	0.65343	0.69763	0.74227	0.74645	0.75835	0.80429
VVD1	0.11659	0.17597	0.13514	0.21327	0.36895	0.47073	0.01369	0.05257	0.12848	0.43277	0.52556	0.60365	0.64918	0.59379	0.65172	0.58237	0.54022	0.50073	0.5441	0.55329	0.61914	0.60081	0.55647	0.42927	0.268	0.06496	0.12742	0.19258	0.04856	0.3425	0.49027	0.17268	0.01174	0.23545	0.32227	0.00613	0.13062	0.2922	0.28044	0.21776	0.40995	0.53626	0.55787	0.59969	0.62291	0.67186	0.69108	0.68257	0.71664
VVD1	0.31032	0.35453	0.30246	0.34426	0.48343	0.52299	0.17348	0.16666	0.2992	0.54656	0.6206	0.65887	0.62484	0.61513	0.6058	0.48302	0.48185	0.38461	0.42553	0.45664	0.55825	0.64283	0.65048	0.59402	0.46826	0.29357	0.10823	0.04423	0.09694	0.36004	0.54262	0.08596	0.1216	0.26898	0.39693	0.10887	0.04474	0.30683	0.3304	0.11507	0.37592	0.50002	0.57808	0.62139	0.59952	0.65251	0.69842	0.66615	0.66231
VVD1	0.45523	0.50518	0.47462	0.5282	0.63252	0.62545	0.39478	0.39471	0.4901	0.66921	0.67907	0.66781	0.58757	0.56247	0.53416	0.38859	0.38183	0.26958	0.35704	0.42916	0.55965	0.66352	0.70578	0.64924	0.56531	0.41526	0.2811	0.2283	0.25097	0.42894	0.61541	0.08895	0.17902	0.26339	0.38102	0.17364	0.00223	0.28804	0.33246	0.01661	0.2789	0.35991	0.44503	0.48181	0.42773	0.48864	0.54887	0.48659	0.46235
VVD1	0.5604	0.60693	0.58082	0.61324	0.68657	0.64369	0.52818	0.54135	0.59042	0.7064	0.68541	0.6423	0.52508	0.52315	0.46111	0.29685	0.31209	0.17758	0.27269	0.35668	0.49724	0.65038	0.71745	0.70062	0.65099	0.53775	0.43504	0.38792	0.36157	0.44643	0.64434	0.07018	0.21806	0.28335	0.40223	0.23608	0.06884	0.26907	0.32635	0.06558	0.22497	0.28441	0.3895	0.42126	0.33734	0.39188	0.46448	0.38404	0.33422
VVD1	0.63996	0.68611	0.68105	0.71881	0.75112	0.66074	0.6663	0.68503	0.69259	0.72711	0.64349	0.5587	0.41464	0.39492	0.32833	0.16763	0.1729	0.04172	0.17721	0.29069	0.44008	0.58464	0.67472	0.65291	0.65014	0.56605	0.52951	0.49962	0.42755	0.43238	0.61742	0.03661	0.26488	0.22185	0.31849	0.25309	0.08378	0.24427	0.31407	0.12435	0.13601	0.14381	0.23506	0.24866	0.14718	0.20653	0.27977	0.17877	0.12042
VVD1	0.70617	0.74795	0.75414	0.77257	0.7693	0.64135	0.75984	0.77909	0.73088	0.68867	0.5645	0.45119	0.28447	0.27896	0.19378	0.03422	0.05701	0.07797	0.06583	0.18297	0.32891	0.49306	0.60079	0.60759	0.64571	0.60508	0.62043	0.60549	0.48976	0.41574	0.58336	0.0068	0.30985	0.17725	0.26809	0.27031	0.11667	0.22197	0.29822	0.18586	0.06743	0.03933	0.13106	0.13126	0.00888	0.06171	0.13738	0.02205	0.05413
VVD1	0.74172	0.78057	0.77835	0.77704	0.7627	0.6237	0.78377	0.79761	0.70504	0.63029	0.4909	0.37331	0.20825	0.2248	0.1273	0.01837	0.03598	0.10298	0.03839	0.14104	0.2673	0.44738	0.54913	0.57636	0.62898	0.60972	0.65127	0.63894	0.45659	0.34947	0.51644	0.0834	0.37053	0.12236	0.23488	0.25503	0.11342	0.26309	0.34142	0.15179	0.11395	0.06016	0.14426	0.12895	0.0039	0.04173	0.10924	0.01337	0.1035
VVD1	0.74744	0.77726	0.77908	0.75638	0.71061	0.54711	0.80494	0.82351	0.68567	0.54484	0.3813	0.24821	0.07451	0.10772	0.00357	0.13485	0.06234	0.19637	0.06057	0.03684	0.14676	0.3362	0.44462	0.50009	0.58654	0.60763	0.69174	0.69071	0.46476	0.282	0.42658	0.13661	0.39143	0.06712	0.17357	0.25149	0.1335	0.23129	0.31207	0.17872	0.06242	0.01802	0.06154	0.03222	0.10841	0.07202	0.00948	0.13441	0.2347
VVD1	0.74051	0.75277	0.75022	0.69682	0.63091	0.44469	0.78514	0.81835	0.64667	0.45564	0.29135	0.15096	0.03732	0.02342	0.11002	0.23476	0.14177	0.27916	0.16462	0.07668	0.02167	0.23553	0.35509	0.45264	0.56459	0.61926	0.72219	0.72774	0.46315	0.20443	0.33142	0.20191	0.41079	0.02786	0.13714	0.24957	0.15747	0.19886	0.28811	0.18928	0.04003	0.05353	0.03391	0.00543	0.15138	0.12493	0.06406	0.18611	0.29453
VVD1	0.70554	0.70989	0.7192	0.66009	0.56821	0.362	0.76263	0.79289	0.59277	0.3487	0.16073	0.01123	0.17387	0.12115	0.24591	0.34651	0.25931	0.37533	0.25688	0.17146	0.08858	0.09781	0.21917	0.3189	0.45382	0.5371	0.68222	0.70279	0.42513	0.13599	0.22299	0.24919	0.42742	0.06661	0.01888	0.19502	0.12837	0.16062	0.25573	0.18935	0.01032	0.13569	0.07076	0.12553	0.26622	0.24557	0.19389	0.31507	0.4208
VVD1	0.68988	0.68369	0.69802	0.63163	0.52429	0.30889	0.76617	0.80328	0.6008	0.33513	0.15243	0.00427	0.20771	0.14518	0.28282	0.3928	0.30769	0.42859	0.32149	0.23087	0.14229	0.06213	0.19761	0.31827	0.46752	0.56986	0.71978	0.74636	0.47022	0.12505	0.20188	0.24049	0.39561	0.03607	0.03043	0.22812	0.17303	0.09779	0.19727	0.24322	0.07554	0.19436	0.11775	0.17034	0.31267	0.29555	0.23781	0.35579	0.46371
VVD1	0.70609	0.71424	0.73548	0.69631	0.5997	0.39283	0.79733	0.82853	0.64699	0.40867	0.21784	0.06187	0.13083	0.09186	0.21164	0.32532	0.25765	0.37558	0.24594	0.14369	0.04574	0.13836	0.26804	0.35412	0.49044	0.57025	0.71439	0.7377	0.49098	0.19326	0.28516	0.17813	0.37723	0.00569	0.05776	0.24553	0.16354	0.11509	0.20943	0.24437	0.07667	0.18947	0.12102	0.16719	0.30844	0.28006	0.22044	0.34388	0.44408
VVD1	0.69433	0.69929	0.70533	0.65361	0.57466	0.38606	0.78203	0.83925	0.68272	0.4838	0.3241	0.17379	0.02404	0.04317	0.10302	0.22882	0.14479	0.28591	0.17849	0.07511	0.02386	0.24714	0.37613	0.48257	0.60658	0.67302	0.77073	0.77646	0.51708	0.18641	0.31896	0.14824	0.33366	0.0919	0.17897	0.31964	0.23578	0.11376	0.20015	0.26062	0.05848	0.13908	0.03493	0.06515	0.21074	0.18446	0.11911	0.23241	0.33678
VVD1	0.72484	0.74165	0.74047	0.70305	0.65619	0.48035	0.77821	0.83135	0.70791	0.57138	0.43016	0.29399	0.10084	0.157	0.02227	0.12311	0.0468	0.19795	0.08227	0.02201	0.13794	0.36044	0.4824	0.56601	0.65669	0.68229	0.74171	0.73583	0.50425	0.25588	0.41651	0.12268	0.34899	0.12767	0.23222	0.3105	0.20144	0.18009	0.26182	0.23035	0.00772	0.05037	0.06015	0.04252	0.10074	0.06586	0.0053	0.10948	0.21066
VVD1	0.71874	0.73656	0.71427	0.67377	0.66185	0.51833	0.7309	0.77795	0.67865	0.60588	0.51218	0.40266	0.2144	0.29038	0.14751	0.01659	0.07488	0.09472	0.00402	0.08501	0.20448	0.45607	0.56824	0.6637	0.71935	0.72012	0.72733	0.70594	0.49578	0.29564	0.48191	0.10077	0.3386	0.19819	0.33709	0.32659	0.20369	0.2286	0.30711	0.18878	0.10128	0.08066	0.21391	0.21088	0.07185	0.10512	0.18103	0.07324	0.02924
VVD1	0.67588	0.69856	0.67494	0.65129	0.6666	0.55037	0.67846	0.72973	0.68568	0.67401	0.61139	0.51813	0.33903	0.39678	0.26719	0.0929	0.15907	0.00972	0.07825	0.1741	0.30916	0.54688	0.65392	0.72419	0.75089	0.71473	0.67644	0.64429	0.48907	0.34532	0.54671	0.03639	0.2822	0.26234	0.39254	0.33069	0.19387	0.22487	0.29797	0.17968	0.11907	0.13074	0.27078	0.28517	0.15914	0.20033	0.28012	0.18301	0.0959
VVD1	0.67678	0.69579	0.65159	0.61979	0.66148	0.55704	0.62171	0.66883	0.63368	0.66047	0.6274	0.55667	0.38346	0.45464	0.32387	0.14462	0.22089	0.04243	0.11667	0.19982	0.33427	0.5834	0.68056	0.75568	0.75768	0.70112	0.63198	0.58888	0.41622	0.31483	0.52776	0.0947	0.32779	0.24345	0.40531	0.28836	0.14509	0.29382	0.37107	0.09345	0.23456	0.25924	0.40185	0.41498	0.29483	0.33701	0.41329	0.32018	0.23381
VVD1	0.58997	0.6155	0.54998	0.52889	0.62018	0.56937	0.45788	0.48129	0.4925	0.62297	0.65263	0.63051	0.50099	0.57059	0.46797	0.29341	0.3685	0.19995	0.24599	0.29504	0.41696	0.64283	0.70551	0.75911	0.70069	0.59695	0.46265	0.40528	0.29568	0.3379	0.55925	0.0654	0.30145	0.26358	0.45156	0.22152	0.07409	0.35489	0.41729	0.00963	0.35862	0.43001	0.5674	0.59577	0.50254	0.54415	0.61388	0.53889	0.46765
VVD1	0.54517	0.58183	0.51351	0.51814	0.6362	0.61559	0.38099	0.37747	0.41372	0.59889	0.63919	0.64135	0.55257	0.59524	0.53076	0.37313	0.43185	0.28476	0.34093	0.37641	0.48877	0.66401	0.69897	0.70481	0.61147	0.47199	0.32154	0.25847	0.18739	0.35432	0.56809	0.0636	0.31898	0.2092	0.40793	0.13349	0.02826	0.42817	0.48023	0.11628	0.45776	0.5306	0.63935	0.66462	0.59183	0.64029	0.69833	0.62652	0.57207
VVD1	0.38342	0.4175	0.34227	0.35848	0.51416	0.54718	0.17706	0.16549	0.2557	0.51993	0.61459	0.66157	0.6206	0.64897	0.62031	0.48653	0.52467	0.40384	0.43447	0.44523	0.53724	0.66432	0.66491	0.63938	0.50004	0.32499	0.12551	0.05171	0.04881	0.32	0.518	0.02838	0.25162	0.19572	0.39279	0.05687	0.09067	0.42987	0.46464	0.20265	0.51515	0.61624	0.71032	0.74931	0.71333	0.75999	0.80295	0.75946	0.73243
VVD1	0.47593	0.5036	0.42302	0.42762	0.58504	0.57838	0.20335	0.17308	0.2217	0.45954	0.5377	0.58219	0.52551	0.54674	0.52976	0.38725	0.42646	0.3033	0.35353	0.36496	0.46725	0.58566	0.59127	0.56413	0.42791	0.25361	0.08382	0.0188	0.01963	0.29887	0.47944	0.16437	0.40057	0.05112	0.27162	0.04605	0.20902	0.52936	0.5946	0.29881	0.61332	0.67788	0.74906	0.76495	0.72865	0.78073	0.82021	0.76122	0.73139
VVD1	0.35755	0.37661	0.28346	0.28089	0.44971	0.47158	0.04628	0.0081	0.07672	0.35112	0.47022	0.54647	0.52373	0.55909	0.55356	0.43027	0.46995	0.35967	0.37374	0.36064	0.44011	0.54278	0.52425	0.50196	0.34688	0.16795	0.02302	0.09233	0.12934	0.21945	0.39195	0.16685	0.33923	0.06015	0.27348	0.08272	0.22691	0.52133	0.56836	0.37141	0.66166	0.75316	0.81318	0.8299	0.82027	0.86445	0.89155	0.85657	0.84183
VVD1	0.27771	0.30322	0.21277	0.22403	0.40307	0.45031	0.04315	0.10355	0.02304	0.27323	0.39271	0.48792	0.50532	0.51539	0.54709	0.45615	0.47766	0.39841	0.42039	0.39414	0.45176	0.49767	0.45159	0.39177	0.2222	0.0276	0.15601	0.22322	0.23781	0.18228	0.33098	0.1711	0.32772	0.00465	0.19523	0.17019	0.30389	0.54721	0.58259	0.45859	0.71486	0.793	0.81484	0.82252	0.8372	0.88021	0.88739	0.86163	0.86411
VVD1	0.22551	0.22939	0.10776	0.07874	0.25464	0.29436	0.12714	0.14311	0.08316	0.1998	0.35063	0.45283	0.46968	0.54801	0.53163	0.45484	0.53179	0.4281	0.39954	0.35113	0.37293	0.4782	0.42662	0.42915	0.2747	0.10427	0.09327	0.17158	0.30457	0.00316	0.18452	0.25688	0.31235	0.0199	0.26046	0.09754	0.20667	0.52453	0.55509	0.46895	0.72494	0.83281	0.88025	0.88649	0.89797	0.93077	0.92966	0.92469	0.91974
VVD1	0.05967	0.09499	0.21855	0.28134	0.13725	0.11474	0.35089	0.24463	0.13945	0.09193	0.27315	0.36404	0.38033	0.48909	0.43058	0.41045	0.48001	0.38803	0.30356	0.27553	0.25438	0.35849	0.31851	0.35964	0.25916	0.13073	0.07592	0.15974	0.37874	0.33147	0.15858	0.27851	0.09747	0.06585	0.26297	0.0437	0.01436	0.27302	0.29586	0.36362	0.4847	0.6261	0.68898	0.70076	0.74262	0.77433	0.74806	0.80217	0.83708
VVD1	0.14022	0.17923	0.31173	0.37668	0.23899	0.2008	0.39068	0.24885	0.15228	0.08213	0.26973	0.36171	0.39727	0.53911	0.45609	0.46459	0.56783	0.46875	0.35951	0.32144	0.2656	0.39088	0.33543	0.39382	0.30479	0.18871	0.0211	0.11707	0.41606	0.45847	0.25477	0.27669	0.03692	0.103	0.32343	0.12388	0.0827	0.24288	0.23773	0.3555	0.45186	0.59027	0.66107	0.67923	0.713	0.7357	0.69597	0.76123	0.78977
VVD1	0.21127	0.27178	0.39359	0.48387	0.38939	0.39779	0.40436	0.19555	0.10917	0.04238	0.21228	0.27202	0.27566	0.43525	0.31639	0.34006	0.44146	0.33913	0.21586	0.20392	0.14095	0.28487	0.26	0.35571	0.32372	0.25495	0.07774	0.00917	0.37827	0.61387	0.42218	0.31293	0.03341	0.10526	0.28976	0.21578	0.2006	0.0974	0.09628	0.24787	0.26655	0.39549	0.47846	0.49223	0.52274	0.54483	0.50077	0.58029	0.61513
VVD1	0.3747	0.36985	0.46388	0.46067	0.30617	0.14637	0.55009	0.50472	0.33698	0.01793	0.16909	0.30404	0.4595	0.50782	0.53504	0.60983	0.63992	0.63319	0.54247	0.47357	0.38808	0.35374	0.22527	0.16459	0.02295	0.12856	0.32948	0.41861	0.52041	0.33526	0.2001	0.04666	0.14515	0.11041	0.23763	0.0269	0.03584	0.20878	0.14119	0.44299	0.47615	0.60583	0.58655	0.60661	0.69847	0.71403	0.64285	0.72878	0.79973
VVD1	0.2967	0.24134	0.31835	0.25682	0.0713	0.17071	0.45393	0.53358	0.35794	0.03521	0.20925	0.37543	0.58272	0.57378	0.67311	0.73608	0.73833	0.76239	0.71615	0.62027	0.54869	0.45278	0.28527	0.15366	0.0532	0.24721	0.44905	0.5328	0.46367	0.02014	0.09818	0.13226	0.13048	0.14279	0.25886	0.13646	0.17699	0.34171	0.24562	0.49866	0.61416	0.72806	0.66951	0.69649	0.78708	0.79473	0.73071	0.78419	0.84322
VVD1	0.30214	0.25048	0.32581	0.26213	0.07931	0.14694	0.45634	0.51858	0.33564	0.05074	0.21819	0.3802	0.57834	0.55665	0.659	0.72208	0.71112	0.73388	0.69882	0.6201	0.55742	0.45061	0.28918	0.1445	0.05623	0.25805	0.45796	0.53896	0.48564	0.05594	0.0566	0.08897	0.11081	0.11015	0.23057	0.13799	0.18004	0.33293	0.24701	0.50336	0.5986	0.70339	0.64114	0.66454	0.75885	0.77485	0.70553	0.75865	0.82353
VVD1	0.05539	0.08351	0.02263	0.01006	0.17732	0.28311	0.24962	0.30083	0.20189	0.13094	0.28277	0.41563	0.50735	0.53524	0.58053	0.55813	0.59328	0.54141	0.52865	0.47065	0.46447	0.469	0.36531	0.29352	0.10793	0.08758	0.27815	0.35639	0.42068	0.01763	0.12983	0.18088	0.21863	0.01334	0.19959	0.1693	0.26936	0.52692	0.51964	0.55403	0.75482	0.83967	0.82663	0.82811	0.87481	0.9059	0.87167	0.8784	0.90098
VVD1	0.03588	0.04503	0.06153	0.06189	0.1103	0.18561	0.27752	0.30076	0.2133	0.08564	0.23168	0.35397	0.4351	0.46954	0.50448	0.49373	0.52812	0.47683	0.46195	0.41267	0.4029	0.40835	0.31328	0.25019	0.08659	0.09566	0.27247	0.35153	0.46515	0.1325	0.00161	0.27538	0.25879	0.09658	0.11443	0.20178	0.2878	0.51993	0.52277	0.5957	0.75095	0.81071	0.79609	0.78258	0.83508	0.86682	0.82234	0.83473	0.86392
VVD1	0.38583	0.40617	0.30864	0.30003	0.46727	0.48044	0.01086	0.08517	0.07657	0.18045	0.27235	0.3623	0.37488	0.40122	0.43318	0.34403	0.39428	0.31171	0.34587	0.30315	0.3516	0.40665	0.35511	0.31239	0.15369	0.02196	0.15719	0.2141	0.29898	0.12997	0.26613	0.31807	0.49086	0.15898	0.07248	0.27573	0.39133	0.65742	0.70577	0.5564	0.83047	0.85287	0.8566	0.8332	0.83534	0.87333	0.87131	0.82383	0.80668
VVD1	0.50187	0.51584	0.41481	0.39149	0.54703	0.51363	0.14051	0.08925	0.08513	0.30323	0.38067	0.43959	0.39589	0.44673	0.43246	0.30717	0.37389	0.25105	0.2891	0.27491	0.35101	0.47238	0.45949	0.45566	0.32359	0.16051	0.0215	0.03894	0.17698	0.15085	0.32535	0.34403	0.52784	0.10084	0.15211	0.1597	0.30162	0.63541	0.71008	0.45356	0.76351	0.79859	0.84348	0.82623	0.7978	0.84354	0.86338	0.80194	0.76693
VVD1	0.4728	0.47523	0.36376	0.32198	0.47321	0.44687	0.12662	0.10477	0.10776	0.32383	0.42775	0.48496	0.42966	0.51683	0.46869	0.33424	0.42362	0.28134	0.28752	0.26923	0.34072	0.51108	0.50777	0.54375	0.42031	0.27228	0.10688	0.03753	0.11701	0.12611	0.31607	0.32038	0.46938	0.00937	0.25259	0.07973	0.21088	0.58376	0.6499	0.39541	0.72238	0.78963	0.87397	0.86777	0.83188	0.87049	0.89825	0.84826	0.80686
VVD1	0.54051	0.56321	0.46581	0.44037	0.58617	0.56047	0.24265	0.22275	0.22383	0.43732	0.51182	0.55016	0.48866	0.559	0.50769	0.36499	0.45347	0.30878	0.34315	0.33454	0.41874	0.59182	0.59534	0.61354	0.49118	0.34029	0.18166	0.11359	0.01197	0.23913	0.44967	0.22809	0.45309	0.05153	0.30518	0.0219	0.16934	0.57939	0.6356	0.30443	0.65945	0.7183	0.81107	0.81817	0.75725	0.79869	0.8404	0.77246	0.71801
VVD1	0.50098	0.5105	0.40676	0.36136	0.49877	0.48294	0.22567	0.22686	0.23513	0.43921	0.54052	0.57964	0.50003	0.60394	0.52164	0.36807	0.46948	0.3096	0.30923	0.29852	0.38197	0.59943	0.61669	0.67919	0.56692	0.43482	0.25302	0.18125	0.05725	0.21928	0.42707	0.20231	0.38231	0.14896	0.39885	0.05547	0.07045	0.50013	0.55553	0.23083	0.60215	0.68453	0.8135	0.83224	0.76682	0.79814	0.84515	0.7892	0.72658
VVD1	0.66251	0.67678	0.58865	0.53212	0.62641	0.55552	0.43988	0.44199	0.39042	0.50194	0.53679	0.52401	0.398	0.50531	0.39484	0.22126	0.33653	0.15959	0.19331	0.20689	0.31	0.56182	0.61526	0.70448	0.64412	0.5549	0.43702	0.38216	0.20531	0.27341	0.48553	0.21836	0.44497	0.14615	0.38173	0.11711	0.01403	0.48341	0.55386	0.12024	0.51229	0.55703	0.69343	0.69907	0.5966	0.6274	0.68929	0.60303	0.51281
VVD1	0.64822	0.66112	0.58276	0.52448	0.60472	0.54456	0.4657	0.46411	0.41448	0.51403	0.54971	0.53167	0.39412	0.50489	0.38651	0.20198	0.31689	0.13846	0.16162	0.17754	0.2885	0.55338	0.6156	0.72109	0.66838	0.59697	0.47961	0.42897	0.28792	0.32183	0.52796	0.15035	0.38332	0.21434	0.42625	0.16833	0.05091	0.40687	0.47744	0.04237	0.43649	0.48929	0.63704	0.65189	0.54482	0.56936	0.64138	0.55663	0.46098
VVD1	0.68235	0.69381	0.62849	0.56625	0.61571	0.53139	0.55668	0.5733	0.49952	0.54082	0.54198	0.49671	0.33965	0.45518	0.31566	0.13563	0.25575	0.07253	0.10609	0.14144	0.25212	0.53259	0.61104	0.72988	0.71444	0.67224	0.59099	0.54541	0.36895	0.30565	0.5113	0.13799	0.36615	0.22616	0.41792	0.22573	0.11295	0.35577	0.4208	0.03616	0.33743	0.37268	0.52494	0.53677	0.41404	0.43589	0.51276	0.42211	0.31693
VVD1	0.67099	0.67783	0.63002	0.57337	0.61734	0.52997	0.56987	0.58846	0.5332	0.57104	0.5744	0.51776	0.34044	0.43016	0.29569	0.09896	0.19038	0.01232	0.04937	0.09932	0.23516	0.50765	0.60735	0.72155	0.70825	0.66663	0.58045	0.54418	0.41804	0.35872	0.54886	0.08488	0.32812	0.24772	0.39823	0.22852	0.1147	0.29237	0.36936	0.0929	0.25576	0.29555	0.4532	0.47671	0.35578	0.37896	0.46761	0.37847	0.27777
VVD1	0.73427	0.74013	0.70972	0.64717	0.64489	0.53746	0.68235	0.6552	0.53674	0.47613	0.43548	0.3518	0.13919	0.21678	0.07856	0.12663	0.03476	0.203	0.15087	0.09459	0.05552	0.32446	0.44873	0.58973	0.61698	0.63533	0.6196	0.61207	0.50886	0.41699	0.54054	0.11871	0.40232	0.14546	0.28085	0.18589	0.08191	0.25333	0.35741	0.14164	0.18752	0.18623	0.31778	0.31992	0.19252	0.20375	0.29678	0.18854	0.06951
Linker	0.81185	0.81258	0.83146	0.78901	0.7432	0.57471	0.71873	0.57699	0.38999	0.2237	0.10062	0.00486	0.21474	0.21705	0.27787	0.47391	0.44602	0.54743	0.44146	0.38618	0.21499	0.05783	0.08404	0.18112	0.23588	0.29788	0.41314	0.46767	0.4695	0.51422	0.4995	0.19644	0.54367	0.13088	0.09846	0.08311	0.1729	0.24484	0.38044	0.10369	0.14836	0.06618	0.11011	0.06514	0.03571	0.01754	0.0766	0.05575	0.15839
Linker	0.70728	0.73874	0.78929	0.78764	0.76559	0.65893	0.59657	0.37338	0.2179	0.11319	0.02192	0.08398	0.22222	0.3134	0.26809	0.43479	0.46623	0.49115	0.3567	0.3357	0.17415	0.15374	0.05839	0.06018	0.0561	0.03438	0.08902	0.15806	0.32358	0.64553	0.56612	0.09126	0.50502	0.21849	0.25457	0.29398	0.3647	0.27138	0.38205	0.00655	0.19866	0.09572	0.06268	0.02045	0.04253	0.02817	0.05469	0.07392	0.15107
Linker	0.54122	0.58903	0.65255	0.68458	0.68577	0.64944	0.44135	0.18182	0.06895	0.03063	0.08388	0.11685	0.18669	0.32403	0.21538	0.34788	0.41512	0.3831	0.25567	0.26653	0.13001	0.19594	0.14046	0.20028	0.23832	0.24063	0.13664	0.06391	0.24617	0.71932	0.58292	0.02747	0.40111	0.22243	0.30021	0.4002	0.45364	0.25339	0.33413	0.05058	0.20205	0.10201	0.03721	0.00585	0.02437	0.01924	0.05128	0.05939	0.11248
Linker	0.65379	0.68663	0.72884	0.75001	0.74858	0.66444	0.50463	0.26024	0.1086	0.04388	0.06072	0.09901	0.20721	0.30038	0.2346	0.3883	0.41609	0.42577	0.30561	0.31155	0.17055	0.16996	0.09642	0.10803	0.1308	0.12125	0.01332	0.05423	0.27933	0.68856	0.57727	0.08243	0.51718	0.25902	0.27377	0.36255	0.45282	0.34746	0.43746	0.10232	0.27087	0.16989	0.13503	0.09186	0.04369	0.05364	0.13214	0.00821	0.06026
Linker	0.66676	0.70903	0.7456	0.77025	0.77426	0.69551	0.49206	0.2308	0.07783	0.01937	0.08277	0.10962	0.19903	0.29169	0.21568	0.36072	0.38252	0.3876	0.26639	0.28477	0.15402	0.16149	0.10311	0.12337	0.15612	0.15622	0.04574	0.02352	0.25043	0.70876	0.61059	0.07173	0.52537	0.25651	0.25845	0.37611	0.4641	0.37506	0.46692	0.11026	0.31357	0.22227	0.17994	0.13403	0.08356	0.09519	0.17182	0.0443	0.02467
Linker	0.56692	0.6202	0.67157	0.71072	0.71358	0.66413	0.41422	0.13353	0.00464	0.04712	0.15671	0.17611	0.22516	0.35197	0.23708	0.35076	0.39892	0.3638	0.23599	0.26553	0.15496	0.22411	0.18689	0.24488	0.28453	0.28753	0.16703	0.08865	0.21175	0.73525	0.60405	0.01406	0.44447	0.26378	0.3029	0.40814	0.48663	0.31934	0.39719	0.09325	0.25392	0.16671	0.0935	0.04999	0.01915	0.02675	0.09417	0.02174	0.07385
Linker	0.50737	0.57821	0.62313	0.67733	0.70356	0.70512	0.35248	0.05289	0.05084	0.04523	0.13802	0.13187	0.13412	0.26668	0.1263	0.22262	0.26957	0.22135	0.09655	0.14694	0.05557	0.15197	0.14988	0.23925	0.31111	0.34353	0.24901	0.1801	0.14994	0.75754	0.64249	0.07571	0.39714	0.22434	0.24931	0.41741	0.4944	0.35262	0.40469	0.13376	0.31274	0.24217	0.15453	0.12031	0.0974	0.1017	0.15932	0.04955	0.00335
Linker	0.52769	0.60632	0.63471	0.69283	0.74022	0.76555	0.36248	0.06857	0.02355	0.02341	0.05272	0.03412	0.0267	0.1419	0.01	0.11384	0.13962	0.10975	0.00862	0.04786	0.04228	0.03177	0.04457	0.13578	0.23004	0.28494	0.22342	0.1713	0.13823	0.77318	0.69603	0.08014	0.4067	0.16769	0.15169	0.38366	0.46856	0.40902	0.45048	0.15669	0.38818	0.33408	0.26123	0.23557	0.20488	0.2094	0.26689	0.15466	0.10024
Linker	0.51645	0.60252	0.61662	0.67982	0.74148	0.79811	0.35874	0.06757	0.01216	0.08149	0.02852	0.06024	0.08317	0.0135	0.10881	0.00411	0.00411	0.01308	0.11977	0.05425	0.13599	0.08375	0.05433	0.03504	0.14881	0.22009	0.19014	0.15479	0.14486	0.78541	0.73835	0.11436	0.37323	0.08102	0.03993	0.33612	0.42887	0.43572	0.46447	0.16871	0.44031	0.40671	0.34974	0.33595	0.30172	0.30257	0.35843	0.24983	0.18857
Linker	0.60873	0.6896	0.68906	0.73847	0.79821	0.82457	0.42915	0.15579	0.05438	0.13845	0.08146	0.10295	0.10161	0.0345	0.12661	0.00597	0.02467	0.01177	0.11841	0.05978	0.14633	0.14277	0.12463	0.06122	0.04289	0.11206	0.08099	0.05376	0.16717	0.75325	0.74231	0.04918	0.43288	0.06635	0.00482	0.29133	0.4019	0.47851	0.52035	0.17106	0.47718	0.44707	0.41014	0.392	0.33949	0.34423	0.40669	0.2891	0.21369
Linker	0.6232	0.69512	0.68465	0.72606	0.78836	0.81149	0.44898	0.20031	0.09342	0.19742	0.16011	0.18345	0.16739	0.13567	0.19822	0.06441	0.10608	0.06217	0.15563	0.10151	0.18943	0.23291	0.21609	0.17881	0.07172	0.0023	0.01043	0.02131	0.186	0.70757	0.72437	0.02399	0.44014	0.01975	0.08393	0.23094	0.35006	0.51437	0.54494	0.18518	0.50458	0.47492	0.46996	0.46076	0.39906	0.40038	0.4621	0.34483	0.25794
Linker	0.5265	0.61163	0.59848	0.65505	0.7203	0.79703	0.39968	0.14307	0.06036	0.19573	0.17583	0.21591	0.23783	0.2093	0.2756	0.16577	0.21524	0.18181	0.25909	0.18808	0.25241	0.28475	0.2432	0.19711	0.07812	0.0051	0.0026	0.00118	0.18144	0.70228	0.72892	0.11865	0.33249	0.06858	0.16739	0.17937	0.28441	0.48241	0.48118	0.1846	0.5044	0.49187	0.48116	0.47997	0.42712	0.42063	0.47108	0.36645	0.28334
Linker	0.39674	0.48532	0.5166	0.6008	0.63214	0.7274	0.32608	0.01366	0.0598	0.01154	0.03536	0.00397	0.05178	0.04722	0.08041	0.00304	0.01268	0.02513	0.11754	0.04531	0.10495	0.03134	0.00977	0.09449	0.1951	0.23348	0.18281	0.14374	0.20045	0.79321	0.70196	0.22233	0.24234	0.01534	0.02186	0.29416	0.37951	0.35119	0.35656	0.1526	0.358	0.32821	0.26609	0.25148	0.23414	0.21881	0.26589	0.17215	0.11726
Linker	0.40979	0.47908	0.55965	0.63059	0.61506	0.61309	0.35121	0.07113	0.02032	0.06057	0.16831	0.18063	0.18932	0.3485	0.20242	0.28335	0.36667	0.2959	0.16649	0.19383	0.09648	0.22565	0.20961	0.30687	0.35196	0.35556	0.23718	0.16045	0.22613	0.76006	0.59958	0.16009	0.28979	0.20343	0.30014	0.40074	0.45385	0.23136	0.2705	0.03093	0.13298	0.04212	0.04231	0.0658	0.0833	0.08855	0.03011	0.13169	0.1706
Linker	0.52775	0.56751	0.65752	0.68274	0.61979	0.5049	0.46075	0.24333	0.10257	0.06087	0.21864	0.28575	0.3742	0.51757	0.41462	0.51976	0.6018	0.55489	0.41308	0.395	0.27117	0.35723	0.27752	0.32871	0.3023	0.25755	0.08903	0.00596	0.30486	0.6644	0.49358	0.01088	0.38963	0.29902	0.40244	0.36046	0.40852	0.15145	0.2447	0.09058	0.01272	0.12714	0.18996	0.23232	0.26958	0.26104	0.18772	0.30111	0.34682
Linker	0.53551	0.54102	0.63745	0.63246	0.53205	0.3307	0.4834	0.34338	0.18399	0.07698	0.26314	0.37359	0.52199	0.65379	0.59171	0.69814	0.78883	0.75275	0.60946	0.54989	0.41564	0.47681	0.34721	0.36145	0.27318	0.19017	0.01152	0.11638	0.33036	0.50549	0.3222	0.10893	0.41033	0.37011	0.49303	0.31601	0.35122	0.03798	0.1649	0.18663	0.17198	0.30574	0.35205	0.40444	0.44943	0.43205	0.35483	0.46135	0.50246
Linker	0.42863	0.43101	0.54026	0.55364	0.45401	0.28118	0.41608	0.26955	0.14792	0.09119	0.27181	0.37715	0.50862	0.66744	0.58305	0.67797	0.80234	0.74045	0.60033	0.53863	0.40118	0.50271	0.37968	0.42008	0.33995	0.26296	0.07163	0.03573	0.31385	0.51003	0.29526	0.04841	0.33077	0.36232	0.52257	0.34327	0.36203	0.03805	0.08039	0.19505	0.22498	0.35978	0.41781	0.46328	0.48819	0.47476	0.40317	0.49446	0.51857
Linker	0.31393	0.32413	0.44555	0.48183	0.38741	0.27348	0.35918	0.18605	0.10214	0.10149	0.26831	0.35933	0.45957	0.64527	0.53435	0.61552	0.76731	0.67962	0.54727	0.49171	0.35564	0.4978	0.39195	0.4597	0.39677	0.32908	0.15224	0.04443	0.31224	0.54985	0.31318	0.05682	0.22629	0.31353	0.50943	0.36197	0.35312	0.09386	0.000995	0.19757	0.2424	0.37604	0.44832	0.48303	0.49054	0.48573	0.42347	0.50233	0.51483
Linker	0.26557	0.29049	0.41352	0.47178	0.3809	0.31254	0.32946	0.11419	0.04002	0.14103	0.302	0.37291	0.43299	0.62977	0.49317	0.55499	0.71084	0.60313	0.46917	0.43126	0.3121	0.48486	0.40919	0.50079	0.4542	0.3906	0.20993	0.10285	0.29434	0.59581	0.34528	0.12648	0.17542	0.28105	0.49509	0.39048	0.38281	0.07846	0.00681	0.14397	0.18918	0.31728	0.41492	0.4548	0.44987	0.45112	0.39675	0.47238	0.47899
Linker	0.33008	0.37571	0.48443	0.554	0.49384	0.46015	0.34771	0.08741	0.00654	0.11391	0.25986	0.30572	0.33842	0.53096	0.3775	0.44894	0.58411	0.48212	0.34415	0.33339	0.21852	0.38732	0.34044	0.44695	0.44136	0.40637	0.24697	0.14951	0.26944	0.69656	0.47126	0.15401	0.22155	0.25472	0.43411	0.42833	0.44171	0.04791	0.10586	0.06144	0.04166	0.15822	0.26112	0.29837	0.29756	0.30079	0.24352	0.3314	0.34945
Linker	0.37634	0.43599	0.53343	0.60251	0.56343	0.55488	0.37114	0.09393	0.01437	0.06693	0.20284	0.23806	0.25715	0.44511	0.28974	0.36838	0.48916	0.39564	0.25847	0.25854	0.14285	0.30204	0.26926	0.38336	0.40169	0.38975	0.25091	0.16015	0.26451	0.75473	0.55982	0.1757	0.23968	0.21231	0.3636	0.42856	0.44328	0.1115	0.16112	0.05064	0.04094	0.06296	0.16142	0.19201	0.19999	0.20259	0.14227	0.23856	0.26661
Linker	0.5429	0.59259	0.67323	0.72116	0.67578	0.60899	0.49361	0.22613	0.09455	0.02378	0.17071	0.22249	0.29583	0.44781	0.33249	0.44841	0.53332	0.48506	0.33964	0.32713	0.19225	0.28558	0.22416	0.29374	0.29369	0.26936	0.11582	0.02437	0.29707	0.73356	0.56966	0.03779	0.39071	0.25959	0.35628	0.39602	0.44805	0.19665	0.28377	0.03645	0.09573	0.01259	0.08684	0.12997	0.16615	0.16133	0.0869	0.20447	0.25533
VVD2	0.64469	0.65547	0.71267	0.70549	0.63452	0.46885	0.5614	0.36901	0.19046	0.02598	0.17744	0.26871	0.43794	0.53287	0.49466	0.64967	0.70003	0.70504	0.57915	0.53734	0.37859	0.37568	0.2484	0.22507	0.16727	0.09494	0.07067	0.17255	0.37002	0.60291	0.45194	0.15484	0.49917	0.2944	0.34222	0.28371	0.34869	0.14126	0.29024	0.13382	0.00414	0.09509	0.11575	0.17058	0.23365	0.2199	0.12869	0.24928	0.31499
VVD2	0.68614	0.65515	0.69772	0.62193	0.53176	0.2814	0.589	0.51165	0.30541	0.01747	0.13548	0.26576	0.51394	0.55079	0.59015	0.76543	0.78873	0.84452	0.74315	0.66467	0.49374	0.40186	0.22093	0.11795	0.00497	0.09949	0.26226	0.3568	0.38868	0.3722	0.27003	0.32321	0.54473	0.31192	0.33789	0.17306	0.21204	0.06306	0.25471	0.22596	0.09542	0.20414	0.16709	0.22109	0.31183	0.2932	0.19765	0.31095	0.38679
VVD2	0.60449	0.56003	0.6005	0.51304	0.42522	0.18035	0.47806	0.40458	0.21038	0.07378	0.20629	0.32612	0.56861	0.60857	0.63772	0.80425	0.83997	0.87826	0.79585	0.73098	0.56484	0.49108	0.30963	0.19821	0.09323	0.01794	0.16988	0.26823	0.3346	0.32129	0.18083	0.353	0.53324	0.36607	0.41183	0.24425	0.2522	0.03295	0.22341	0.18982	0.101	0.21514	0.18344	0.23963	0.31219	0.3004	0.21064	0.30991	0.37458
VVD2	0.71293	0.66581	0.68165	0.56829	0.51709	0.25307	0.51124	0.4753	0.28193	0.05025	0.0572	0.17513	0.4397	0.44852	0.5073	0.70388	0.71106	0.79601	0.71671	0.64851	0.46945	0.33572	0.14806	0.0169	0.06525	0.13841	0.2438	0.31942	0.29317	0.29607	0.24622	0.4115	0.60267	0.31892	0.30322	0.19135	0.21045	0.12913	0.32991	0.1856	0.00332	0.09646	0.0289	0.06554	0.16269	0.14329	0.04521	0.15167	0.23537
VVD2	0.81115	0.75254	0.71688	0.57728	0.54589	0.25695	0.53613	0.53715	0.3168	0.11545	0.04398	0.06131	0.34308	0.26316	0.38869	0.59628	0.5217	0.67261	0.62435	0.56998	0.4114	0.17108	0.00927	0.20004	0.27673	0.33985	0.41365	0.45905	0.24707	0.15184	0.1908	0.55529	0.70119	0.27926	0.1519	0.07923	0.13963	0.26361	0.46755	0.07365	0.16639	0.10011	0.20502	0.15918	0.04153	0.06532	0.15843	0.04894	0.05581
VVD2	0.79587	0.7413	0.66287	0.5207	0.54347	0.29983	0.47494	0.50879	0.31972	0.23636	0.23429	0.16772	0.08778	0.05047	0.10827	0.31924	0.19314	0.39212	0.37813	0.34283	0.2083	0.09865	0.24318	0.44876	0.47294	0.485	0.47571	0.47595	0.16887	0.0764	0.21415	0.55797	0.68134	0.14774	0.06898	0.02913	0.06437	0.38746	0.56392	0.02712	0.33817	0.31649	0.45753	0.43644	0.31312	0.33666	0.41848	0.31984	0.20649
VVD2	0.7752	0.762	0.66856	0.56685	0.64075	0.49496	0.44283	0.41335	0.26599	0.31271	0.34031	0.31986	0.14387	0.26748	0.15019	0.04522	0.09127	0.09566	0.07946	0.08292	0.03081	0.30682	0.38729	0.53158	0.4841	0.43183	0.37511	0.35423	0.09826	0.19944	0.38702	0.42299	0.62757	0.03531	0.21543	0.01253	0.09229	0.50189	0.63308	0.12623	0.5303	0.5382	0.65376	0.64656	0.53328	0.55735	0.62736	0.52716	0.4137
VVD2	0.57634	0.58643	0.47808	0.41341	0.53524	0.50558	0.2394	0.17874	0.10527	0.29108	0.38505	0.43454	0.36005	0.47522	0.40217	0.24788	0.38068	0.22368	0.20863	0.16061	0.22974	0.45301	0.45792	0.54874	0.4282	0.31648	0.18957	0.1406	0.05448	0.19039	0.40729	0.26552	0.46305	0.0705	0.32019	0.02575	0.10571	0.52686	0.59885	0.2424	0.65583	0.70618	0.79663	0.81496	0.73371	0.74507	0.79334	0.72338	0.62767
VVD2	0.11888	0.09048	0.04385	0.15633	0.05114	0.0419	0.08722	0.05976	0.08007	0.26287	0.43562	0.48691	0.44094	0.63747	0.47997	0.41585	0.56962	0.40405	0.28789	0.26077	0.2486	0.50886	0.50289	0.65216	0.58406	0.50238	0.30121	0.21361	0.15264	0.31661	0.02437	0.21051	0.06674	0.29039	0.52061	0.29106	0.28197	0.20685	0.22554	0.1054	0.38066	0.50775	0.65258	0.69896	0.64447	0.64946	0.65581	0.67761	0.62824
VVD2	0.12599	0.11719	0.01504	0.12051	0.00237	0.04857	0.09622	0.00912	0.03361	0.25783	0.4355	0.50319	0.48548	0.66164	0.53286	0.4719	0.61486	0.46463	0.35743	0.31717	0.30537	0.53522	0.50845	0.62602	0.53071	0.42864	0.22116	0.13442	0.18266	0.23999	0.0513	0.16664	0.06619	0.29652	0.52003	0.2257	0.22451	0.2718	0.27242	0.1489	0.46845	0.59328	0.71663	0.76513	0.71633	0.71913	0.72116	0.73651	0.68777
VVD2	0.1388	0.11826	0.00581	0.13272	0.02998	0.00915	0.08508	0.02708	0.0336	0.2221	0.38971	0.44301	0.40518	0.57901	0.44352	0.38178	0.51851	0.3703	0.26399	0.23163	0.22639	0.45763	0.44864	0.5799	0.50494	0.41901	0.22954	0.1532	0.18938	0.2985	0.02206	0.22142	0.09419	0.24581	0.44816	0.19354	0.23072	0.24094	0.2505	0.11747	0.43599	0.53846	0.65717	0.69762	0.64707	0.6479	0.64737	0.65969	0.60806
VVD2	0.04047	0.05629	0.05963	0.14379	0.0038	0.11443	0.19423	0.16784	0.11978	0.16985	0.36055	0.46464	0.51158	0.63204	0.57397	0.53923	0.64272	0.54679	0.45103	0.38066	0.35944	0.49547	0.42672	0.47693	0.3384	0.20482	0.00802	0.08622	0.2872	0.16028	0.08716	0.08683	0.02605	0.25671	0.42366	0.05583	0.10342	0.30288	0.28039	0.23971	0.57173	0.68205	0.74405	0.78978	0.77211	0.76628	0.75339	0.77113	0.73738
VVD2	0.0673	0.1065	0.01131	0.05825	0.11048	0.26338	0.17028	0.18623	0.12715	0.20974	0.39569	0.51879	0.59643	0.69578	0.66697	0.63303	0.73664	0.64881	0.57142	0.48689	0.46379	0.57578	0.48028	0.49147	0.31646	0.15228	0.06781	0.15272	0.30266	0.04436	0.20985	0.02899	0.04617	0.26826	0.46147	0.02706	0.03305	0.39203	0.35956	0.29787	0.65527	0.76628	0.81303	0.86359	0.8457	0.84424	0.83101	0.8374	0.80308
VVD2	0.07232	0.09466	0.02761	0.10067	0.06601	0.18471	0.19632	0.17331	0.12615	0.19653	0.38434	0.49696	0.55749	0.67674	0.62853	0.59442	0.71095	0.61093	0.5197	0.43704	0.41028	0.54704	0.46333	0.49823	0.33576	0.17544	0.04618	0.13136	0.3412	0.14542	0.12553	0.10136	0.07343	0.23447	0.44322	0.0374	0.06319	0.38581	0.35154	0.27355	0.62426	0.72869	0.79073	0.84211	0.81925	0.82066	0.80488	0.81499	0.77973
VVD2	0.03739	0.07092	0.03617	0.09783	0.08026	0.22228	0.26642	0.30009	0.25032	0.10275	0.2865	0.41584	0.50835	0.58009	0.58971	0.5645	0.64792	0.59226	0.51489	0.4073	0.38076	0.44621	0.34395	0.33545	0.14464	0.0312	0.2468	0.31548	0.42713	0.07123	0.15133	0.08509	0.09952	0.13819	0.30301	0.13838	0.08153	0.41738	0.38015	0.33845	0.67641	0.7659	0.78366	0.82918	0.82733	0.82359	0.80577	0.81588	0.79166
VVD2	0.07299	0.13728	0.04855	0.0394	0.2341	0.41686	0.22386	0.34664	0.29154	0.09326	0.25081	0.39786	0.52769	0.54372	0.61582	0.58799	0.64177	0.61927	0.58119	0.46097	0.44612	0.44249	0.31336	0.241	0.01445	0.18293	0.38091	0.44077	0.41698	0.1392	0.31579	0.00304	0.1392	0.08806	0.2428	0.24758	0.23042	0.49549	0.45826	0.42022	0.75136	0.82412	0.7985	0.83823	0.84689	0.84429	0.83057	0.82166	0.80005
VVD2	0.07223	0.13019	0.03621	0.01446	0.21346	0.38855	0.22461	0.31342	0.25565	0.13428	0.29939	0.43979	0.56128	0.59598	0.64978	0.615	0.67693	0.63763	0.58923	0.47784	0.46507	0.4862	0.36208	0.30319	0.07954	0.12228	0.33414	0.40026	0.41191	0.0984	0.30634	0.00235	0.11789	0.13109	0.30731	0.18538	0.16103	0.48772	0.44055	0.37011	0.72321	0.79699	0.79533	0.84712	0.84564	0.84559	0.83102	0.8233	0.79815
VVD2	0.10866	0.14537	0.0582	0.00156	0.19175	0.3024	0.2651	0.32735	0.29238	0.06686	0.22672	0.35224	0.44401	0.4748	0.53063	0.48409	0.53316	0.49936	0.45009	0.3432	0.34251	0.36043	0.25975	0.21547	0.00469	0.19222	0.39331	0.44419	0.46633	0.04359	0.23714	0.09669	0.1915	0.02257	0.17956	0.27428	0.21604	0.47945	0.45908	0.32721	0.67883	0.73518	0.73924	0.78695	0.78411	0.78822	0.77991	0.77067	0.74767
VVD2	0.32605	0.38576	0.33381	0.29266	0.44127	0.52014	0.02402	0.1975	0.24277	0.00682	0.08	0.17444	0.23853	0.21239	0.30858	0.24217	0.26598	0.25734	0.27935	0.18418	0.22342	0.19281	0.11233	0.04384	0.13648	0.29481	0.38806	0.39734	0.34325	0.26899	0.37327	0.12631	0.36269	0.13097	0.03372	0.44039	0.41284	0.54423	0.57352	0.35322	0.71446	0.70411	0.65138	0.65727	0.64018	0.64195	0.65505	0.59589	0.55136
VVD2	0.35325	0.43221	0.37804	0.36998	0.50943	0.61011	0.03425	0.18231	0.23657	0.00595	0.04874	0.15328	0.24056	0.21596	0.31804	0.26234	0.3001	0.2949	0.32604	0.22758	0.25483	0.21621	0.11553	0.03553	0.14271	0.29199	0.35632	0.36607	0.30637	0.3401	0.44781	0.06677	0.34391	0.08586	0.01433	0.40673	0.40795	0.56564	0.57935	0.38031	0.75398	0.7586	0.68403	0.67866	0.66155	0.66378	0.67687	0.60932	0.56395
VVD2	0.27611	0.35104	0.29028	0.28591	0.43721	0.53389	0.08988	0.2894	0.31556	0.0618	0.00959	0.13429	0.25458	0.23652	0.35068	0.31697	0.35644	0.36262	0.37461	0.26245	0.26398	0.20877	0.08539	0.00668	0.19657	0.36113	0.44167	0.45787	0.39996	0.27749	0.40587	0.04891	0.29429	0.08297	0.02279	0.41693	0.4077	0.55427	0.54026	0.38456	0.74311	0.78237	0.70305	0.70221	0.69986	0.70713	0.7152	0.66644	0.64106
VVD2	0.27752	0.35559	0.32091	0.34266	0.45054	0.52387	0.05335	0.29541	0.34102	0.1812	0.16396	0.05231	0.08009	0.02811	0.17253	0.163	0.17783	0.22142	0.25767	0.15334	0.14763	0.03771	0.08486	0.19818	0.35077	0.47562	0.47682	0.4668	0.36277	0.32338	0.38571	0.02627	0.28884	0.1606	0.11822	0.48101	0.48072	0.49369	0.47953	0.37678	0.66577	0.69103	0.56616	0.53402	0.54288	0.55301	0.56402	0.50972	0.49865
VVD2	0.27238	0.34397	0.34156	0.36473	0.42943	0.46216	0.04054	0.29898	0.37465	0.29151	0.32388	0.23631	0.10825	0.19892	0.0258	0.0189	0.03726	0.04416	0.10266	0.00733	0.00478	0.15784	0.26776	0.39809	0.51492	0.60437	0.53885	0.50228	0.36147	0.31457	0.30648	0.05647	0.31676	0.30025	0.32533	0.59289	0.57076	0.43339	0.42839	0.35621	0.56429	0.54485	0.38412	0.32897	0.3453	0.35341	0.36534	0.30653	0.30319
VVD2	0.28954	0.3457	0.35273	0.34405	0.41397	0.41369	0.08097	0.31259	0.40034	0.29154	0.32171	0.24175	0.12897	0.2302	0.04889	0.05304	0.08461	0.00224	0.0603	0.03829	0.02724	0.19412	0.29237	0.42643	0.55244	0.65607	0.60367	0.56412	0.43216	0.26089	0.25298	0.12431	0.37834	0.39233	0.4279	0.6829	0.61794	0.45552	0.46127	0.34375	0.55029	0.49573	0.34293	0.29967	0.31437	0.32199	0.33331	0.27226	0.26472
VVD2	0.10381	0.14439	0.19636	0.20913	0.23565	0.22381	0.1811	0.39151	0.44503	0.37672	0.43535	0.37498	0.2409	0.39586	0.17828	0.14167	0.23494	0.09685	0.02862	0.10855	0.10721	0.35595	0.44827	0.62333	0.71722	0.79208	0.70328	0.64579	0.43645	0.19461	0.10594	0.05186	0.24438	0.45416	0.58665	0.7246	0.61181	0.26367	0.249	0.27109	0.32309	0.23855	0.05676	0.01468	0.06214	0.06604	0.06446	0.02936	0.05405
VVD2	0.00477	0.00321	0.07108	0.05725	0.04153	0.03113	0.25932	0.38356	0.43877	0.44394	0.51757	0.48603	0.38143	0.52921	0.32987	0.27617	0.38479	0.23699	0.18278	0.24171	0.2446	0.49679	0.56174	0.71305	0.75789	0.79509	0.68628	0.62128	0.4559	0.00262	0.1208	0.11586	0.1956	0.52461	0.69869	0.71298	0.55019	0.12275	0.10505	0.16428	0.1051	0.00498	0.17178	0.21427	0.15969	0.15608	0.16465	0.18034	0.14016
VVD2	0.03105	0.05893	0.13026	0.14669	0.14764	0.09556	0.21069	0.363	0.41483	0.39059	0.47149	0.43096	0.31263	0.4773	0.25749	0.21013	0.32918	0.17949	0.09621	0.15246	0.14888	0.42166	0.5009	0.68283	0.75258	0.81236	0.70586	0.64486	0.44134	0.097	0.03003	0.07176	0.2206	0.52218	0.68406	0.74224	0.61353	0.21083	0.17229	0.19264	0.15588	0.02975	0.14519	0.18307	0.13322	0.12924	0.13659	0.16667	0.13138
VVD2	0.06384	0.02556	0.01817	0.04389	0.09045	0.14354	0.31506	0.5151	0.53274	0.41036	0.41114	0.31702	0.15197	0.27571	0.05622	0.01145	0.10603	0.0368	0.07493	0.0277	0.04136	0.29005	0.41424	0.58094	0.70169	0.78876	0.75231	0.71463	0.4688	0.13228	0.01409	0.0038	0.15232	0.41144	0.53748	0.76616	0.60285	0.30127	0.20465	0.31375	0.34969	0.24591	0.08145	0.05365	0.11872	0.10322	0.07986	0.06624	0.09381
VVD2	0.02958	0.05892	0.09874	0.11212	0.15235	0.13541	0.3048	0.4909	0.53952	0.45341	0.48764	0.4001	0.24081	0.36431	0.14084	0.08226	0.1668	0.02439	0.03888	0.05354	0.0818	0.34062	0.46303	0.64162	0.74512	0.82714	0.75376	0.72053	0.53429	0.06926	0.04937	0.11735	0.26652	0.55079	0.67271	0.82281	0.73706	0.3789	0.31215	0.4254	0.38889	0.28563	0.09998	0.04649	0.11236	0.11089	0.09191	0.07238	0.11529
VVD2	0.14291	0.15671	0.1037	0.04627	0.16683	0.16577	0.36016	0.49466	0.56495	0.3742	0.29462	0.16092	0.02031	0.00638	0.12217	0.14387	0.1743	0.21539	0.20695	0.07876	0.03173	0.06202	0.2026	0.27839	0.43187	0.55466	0.59613	0.61569	0.63793	0.08987	0.05501	0.31411	0.41381	0.47203	0.40447	0.73795	0.69045	0.66155	0.6031	0.63086	0.7707	0.72172	0.61245	0.57138	0.60549	0.60067	0.5763	0.55671	0.56503
VVD2	0.08493	0.05139	0.05786	0.18277	0.04278	0.01913	0.27594	0.28604	0.33046	0.11158	0.08431	0.20143	0.22839	0.38056	0.33698	0.29237	0.40257	0.31739	0.20629	0.10338	0.08716	0.22725	0.15869	0.25702	0.1201	0.02566	0.15165	0.21651	0.37759	0.22683	0.11192	0.35278	0.28577	0.09592	0.09831	0.307	0.22002	0.50568	0.47536	0.43258	0.71211	0.71062	0.77687	0.7947	0.7844	0.75241	0.73049	0.73399	0.68537
VVD2	0.15852	0.11272	0.01936	0.16108	0.0881	0.08744	0.08377	0.00536	0.07544	0.02834	0.18594	0.24278	0.20559	0.42857	0.28152	0.23475	0.41153	0.26468	0.13788	0.0779	0.04606	0.30153	0.28175	0.46763	0.4288	0.40356	0.25989	0.19227	0.16128	0.33276	0.14348	0.3472	0.20827	0.09738	0.32995	0.06815	0.11434	0.33925	0.32367	0.25889	0.52731	0.58082	0.70732	0.70527	0.65844	0.63843	0.63055	0.63396	0.5686
VVD2	0.27788	0.22314	0.0922	0.06435	0.01059	0.02778	0.01823	0.11237	0.02007	0.08925	0.23733	0.27199	0.17447	0.39888	0.22888	0.1361	0.30652	0.13941	0.0296	0.01151	0.000895	0.29352	0.31556	0.52786	0.49284	0.47557	0.32953	0.26061	0.04043	0.23216	0.08592	0.43267	0.32426	0.05413	0.30856	0.05647	0.06488	0.36897	0.39979	0.20135	0.48917	0.52487	0.68616	0.69294	0.62598	0.6045	0.61496	0.60188	0.51986
VVD2	0.15005	0.05507	0.0617	0.23112	0.20986	0.28926	0.04274	0.09743	0.01091	0.01217	0.1332	0.14715	0.01103	0.25834	0.05287	0.02811	0.14161	0.02363	0.16277	0.18796	0.18583	0.12636	0.18243	0.44639	0.46878	0.51689	0.39303	0.33876	0.00941	0.38202	0.29697	0.47165	0.2449	0.02917	0.24575	0.13263	0.15375	0.16592	0.21515	0.1216	0.27497	0.32529	0.50357	0.49428	0.44566	0.4194	0.43144	0.4461	0.37906
VVD2	0.04195	0.07648	0.18211	0.3617	0.34094	0.47599	0.17942	0.05922	0.00124	0.02815	0.11495	0.11807	0.0217	0.2141	0.01363	0.04901	0.09366	0.05935	0.20203	0.20638	0.21151	0.07326	0.13862	0.38259	0.41583	0.45337	0.31739	0.25443	0.10959	0.57249	0.48529	0.52812	0.20972	0.06085	0.13239	0.10264	0.152	0.08572	0.12754	0.0612	0.11259	0.15853	0.34019	0.35019	0.31167	0.29495	0.30075	0.33948	0.29898
VVD2	0.21978	0.32911	0.4087	0.55522	0.55976	0.66737	0.28667	0.03635	0.05543	0.02036	0.14114	0.12737	0.03238	0.23157	0.03959	0.0478	0.15345	0.03563	0.1116	0.08266	0.12582	0.09551	0.14703	0.33827	0.40623	0.44574	0.32234	0.25738	0.14219	0.75008	0.61953	0.34295	0.08325	0.06632	0.18343	0.29038	0.38055	0.1712	0.17225	0.09631	0.16531	0.09532	0.05917	0.08956	0.06949	0.06494	0.04691	0.12441	0.12623
VVD2	0.04315	0.14172	0.23303	0.39922	0.39624	0.53973	0.17788	0.13258	0.1181	0.08515	0.18375	0.15665	0.04369	0.2496	0.04894	0.03334	0.16632	0.02561	0.10589	0.08002	0.11128	0.14034	0.19999	0.39956	0.46391	0.4902	0.37973	0.31718	0.1543	0.71564	0.5167	0.38832	0.01863	0.0645	0.20193	0.29655	0.38197	0.09816	0.07041	0.10565	0.08364	0.00919	0.14469	0.16662	0.11966	0.12716	0.12492	0.17899	0.16077
VVD2	0.04665	0.05858	0.14599	0.32298	0.32401	0.47457	0.10741	0.17035	0.14	0.09367	0.18252	0.14752	0.01219	0.21085	0.01217	0.03309	0.09922	0.04602	0.17843	0.15671	0.16031	0.10921	0.18423	0.39965	0.46376	0.49126	0.38693	0.32887	0.11511	0.64416	0.45722	0.4187	0.09147	0.02453	0.15492	0.22538	0.33029	0.08117	0.03909	0.1158	0.05248	0.0156	0.1716	0.18714	0.1331	0.13733	0.14977	0.19264	0.1604
VVD2	0.16229	0.05565	0.0298	0.21735	0.21829	0.39295	0.03921	0.20264	0.14588	0.09158	0.17423	0.13346	0.03324	0.15681	0.03838	0.11983	0.00698	0.14531	0.27361	0.25365	0.22317	0.05811	0.15481	0.38377	0.44166	0.47026	0.37496	0.33227	0.07938	0.54639	0.37079	0.45551	0.18497	0.01521	0.1183	0.16552	0.27117	0.04218	0.03313	0.12294	0.01087	0.04587	0.20717	0.21844	0.15558	0.16251	0.19198	0.21672	0.17122
VVD2	0.1006	0.00942	0.07209	0.2582	0.27998	0.43372	0.07114	0.1364	0.08787	0.01554	0.08616	0.04475	0.1044	0.05763	0.1081	0.18213	0.08091	0.20041	0.33734	0.32806	0.29491	0.0522	0.04237	0.26017	0.32222	0.36439	0.28658	0.25865	0.07849	0.51392	0.38667	0.4014	0.13387	0.04121	0.03805	0.09115	0.25541	0.12901	0.06258	0.16995	0.07436	0.0291	0.11228	0.11995	0.07406	0.07188	0.09946	0.1313	0.09109
VVD2	0.20752	0.10592	0.05302	0.13241	0.14998	0.30986	0.01152	0.14042	0.07657	0.01408	0.07608	0.03604	0.12186	0.01357	0.1263	0.22873	0.14423	0.2565	0.37882	0.37743	0.3131	0.08233	0.01942	0.22501	0.27043	0.30118	0.23366	0.21858	0.04975	0.37442	0.27079	0.40367	0.21539	0.08475	0.0224	0.01543	0.15243	0.0647	0.01171	0.16019	0.01156	0.01946	0.15021	0.15406	0.104	0.1018	0.14324	0.15511	0.10479
VVD2	0.19215	0.1002	0.05037	0.12875	0.13117	0.27104	0.06979	0.04298	0.02046	0.04792	0.01941	0.000925	0.12378	0.01057	0.11284	0.20559	0.13121	0.21882	0.34179	0.36317	0.30461	0.11385	0.03667	0.13792	0.1558	0.16797	0.09945	0.08968	0.13429	0.34228	0.25287	0.39825	0.23955	0.14132	0.08315	0.12885	0.05759	0.00971	0.05664	0.10303	0.06331	0.08518	0.18754	0.1887	0.14965	0.14512	0.18043	0.19196	0.14581
VVD2	0.30578	0.22375	0.1957	0.02866	0.01944	0.12826	0.04692	0.10099	0.01896	0.03097	0.00168	0.03263	0.17594	0.10133	0.17897	0.30087	0.25323	0.33026	0.41824	0.43612	0.34397	0.1713	0.07332	0.08748	0.10582	0.12214	0.08377	0.0925	0.05047	0.17269	0.12575	0.38294	0.31727	0.1882	0.16368	0.21607	0.02708	0.0173	0.10115	0.12406	0.07539	0.06845	0.15679	0.15013	0.10589	0.10299	0.15235	0.13917	0.08298
VVD2	0.33406	0.25393	0.22872	0.07369	0.05122	0.07468	0.13427	0.17217	0.08112	0.01917	0.04111	0.00104	0.15156	0.06899	0.16255	0.29163	0.23395	0.32309	0.41157	0.42608	0.32858	0.12753	0.02459	0.14981	0.17645	0.20527	0.17982	0.18842	0.04249	0.11992	0.07134	0.33601	0.28795	0.10838	0.08748	0.13719	0.04526	0.01992	0.06372	0.17168	0.05067	0.04409	0.13771	0.1336	0.07938	0.07228	0.12451	0.10283	0.03302
VVD2	0.21368	0.17639	0.14802	0.04495	0.06863	0.07392	0.01588	0.03198	0.0779	0.00126	0.05811	0.08346	0.04565	0.09568	0.07554	0.01991	0.02724	0.01572	0.11041	0.17974	0.12332	0.00496	0.02415	0.11732	0.06014	0.02825	0.03888	0.04682	0.07341	0.01028	0.06253	0.15154	0.18275	0.03728	0.01295	0.22918	0.03539	0.0597	0.08487	0.06373	0.19754	0.21809	0.26613	0.28344	0.25463	0.23141	0.26647	0.25466	0.19036
VVD2	0.04465	0.11502	0.13985	0.2443	0.25673	0.22801	0.11988	0.10057	0.10876	0.0845	0.0068	0.0066	0.02041	0.06395	0.00577	0.03645	0.02447	0.00917	0.15899	0.22083	0.20715	0.06803	0.05225	0.08009	0.08177	0.1051	0.04015	0.02082	0.04683	0.20972	0.18613	0.0909	0.03671	0.0416	0.02995	0.0812	0.15014	0.1682	0.18236	0.10312	0.00378	0.05076	0.10681	0.11882	0.12486	0.09438	0.10445	0.14506	0.11322
VVD2	0.13699	0.21418	0.23621	0.3596	0.37706	0.37141	0.21141	0.13148	0.11999	0.10365	0.01677	0.00723	0.03285	0.05155	0.01254	0.03566	0.00844	0.01707	0.1734	0.22063	0.21494	0.0959	0.07584	0.05193	0.06271	0.08689	0.01016	0.00815	0.1009	0.32864	0.28862	0.10085	0.1017	0.03925	0.00832	0.06517	0.19317	0.22968	0.24673	0.15529	0.07456	0.02708	0.0362	0.05681	0.06586	0.03799	0.04328	0.09876	0.0823
VVD2	0.18285	0.28979	0.32025	0.46173	0.51742	0.57989	0.15357	0.05784	0.06954	0.01657	0.05733	0.015	0.08489	0.05536	0.10206	0.11964	0.05215	0.12638	0.28607	0.27232	0.27377	0.07843	0.00171	0.19478	0.28473	0.36361	0.29754	0.27044	0.02283	0.53287	0.46224	0.1649	0.17176	0.12161	0.11095	0.21772	0.42121	0.37166	0.36422	0.27364	0.28661	0.22862	0.10787	0.08791	0.10058	0.1198	0.11608	0.04669	0.05876
VVD2	0.12821	0.23761	0.29085	0.44003	0.48371	0.57668	0.12613	0.13022	0.13441	0.05143	0.13402	0.08957	0.02988	0.14741	0.04482	0.06967	0.03028	0.0813	0.2372	0.21153	0.21952	0.01968	0.10097	0.31746	0.41146	0.48247	0.39951	0.35802	0.01436	0.59985	0.47383	0.23033	0.12431	0.13941	0.18918	0.31128	0.46446	0.30338	0.28841	0.24359	0.24759	0.17352	0.02593	0.00491	0.03377	0.0437	0.03909	0.02722	0.01019
VVD2	0.02245	0.07565	0.15419	0.3152	0.31578	0.4132	0.05349	0.19655	0.19051	0.16628	0.27449	0.24015	0.09564	0.29085	0.08302	0.01354	0.13527	0.01713	0.16538	0.14145	0.12225	0.16575	0.25328	0.48139	0.5381	0.56978	0.4418	0.38696	0.02216	0.50924	0.32535	0.28428	0.00376	0.16855	0.29273	0.32106	0.43217	0.14725	0.10658	0.19619	0.0881	0.00346	0.17401	0.20894	0.15577	0.15268	0.17057	0.21407	0.17456
VVD2	0.0625	0.03216	0.1218	0.27666	0.27027	0.38708	0.03347	0.22877	0.21594	0.19472	0.30039	0.26739	0.11879	0.32667	0.10913	0.03905	0.17662	0.00957	0.12761	0.09664	0.08485	0.21485	0.2998	0.52742	0.58379	0.60943	0.48232	0.42005	0.00555	0.53305	0.32286	0.31986	0.0339	0.16102	0.31415	0.35369	0.42277	0.09352	0.04736	0.15231	0.05262	0.04017	0.21939	0.24923	0.1883	0.19292	0.21145	0.25058	0.21159
VVD2	0.01748	0.1118	0.19663	0.34597	0.3478	0.45257	0.07108	0.20999	0.21225	0.18018	0.28053	0.24468	0.11004	0.31438	0.09678	0.05136	0.18323	0.02782	0.10999	0.07197	0.07832	0.20313	0.28051	0.49839	0.56761	0.60013	0.47853	0.4165	0.00525	0.5899	0.38282	0.28411	0.03883	0.18256	0.31633	0.38769	0.46849	0.14965	0.12159	0.18005	0.11311	0.02154	0.15173	0.18463	0.13071	0.13286	0.14107	0.19058	0.16218
VVD2	0.05958	0.15276	0.23826	0.38185	0.38487	0.49928	0.11016	0.19302	0.19788	0.15707	0.25781	0.22393	0.09758	0.30431	0.08627	0.06075	0.19004	0.03871	0.09264	0.04789	0.0702	0.19749	0.26827	0.47712	0.55392	0.58822	0.47374	0.41026	0.03428	0.64309	0.43887	0.29078	0.06035	0.17341	0.30758	0.41125	0.46947	0.15114	0.12876	0.16173	0.13557	0.04526	0.124	0.15595	0.10588	0.10998	0.11062	0.16473	0.14457
VVD2	0.1631	0.2527	0.32017	0.44016	0.46934	0.56971	0.11242	0.20816	0.23417	0.16113	0.24737	0.1994	0.08018	0.27334	0.05303	0.05112	0.16211	0.02689	0.09978	0.03471	0.06762	0.17539	0.24975	0.44676	0.55059	0.60711	0.51046	0.45126	0.03437	0.64619	0.47047	0.20318	0.17654	0.23231	0.3357	0.50485	0.55666	0.26747	0.26206	0.23967	0.28024	0.1898	0.02394	0.01206	0.02896	0.02631	0.0339	0.03087	0.02228
VVD2	0.4384	0.52065	0.5554	0.63732	0.68376	0.71411	0.2854	0.02231	0.10294	0.04285	0.13338	0.10645	0.06395	0.20936	0.0418	0.11058	0.17085	0.10198	0.03086	0.02661	0.04542	0.09201	0.12335	0.25763	0.36003	0.42157	0.33912	0.28436	0.03821	0.70859	0.5949	0.04125	0.39631	0.24861	0.26774	0.47615	0.57053	0.40671	0.45421	0.24384	0.40565	0.32579	0.21129	0.16871	0.16427	0.17118	0.21056	0.11302	0.08289
VVD2	0.55234	0.62651	0.64488	0.70298	0.75004	0.72074	0.34114	0.06828	0.04256	0.01232	0.10935	0.09981	0.09938	0.21484	0.0793	0.17115	0.20456	0.16784	0.02786	0.07535	0.00541	0.08511	0.09173	0.19177	0.27785	0.3342	0.24981	0.19556	0.05033	0.67638	0.59115	0.06459	0.50163	0.28253	0.25978	0.43335	0.56334	0.46387	0.53835	0.24592	0.42351	0.34654	0.25852	0.20714	0.18329	0.2006	0.25111	0.1401	0.09884
VVD2	0.41149	0.49389	0.52538	0.6046	0.66051	0.68176	0.21252	0.08869	0.16554	0.0937	0.17304	0.13306	0.0751	0.21993	0.04046	0.09562	0.15645	0.08196	0.05168	0.01164	0.0467	0.11127	0.1564	0.30189	0.41281	0.48686	0.40807	0.3547	0.04516	0.65714	0.54746	0.02022	0.40347	0.28738	0.3025	0.50434	0.6038	0.44237	0.48312	0.29524	0.43575	0.35583	0.23153	0.18549	0.19038	0.20229	0.23381	0.13942	0.11911
VVD2	0.47474	0.55437	0.56774	0.6317	0.70559	0.73029	0.23975	0.06065	0.14404	0.04328	0.10339	0.0571	0.01114	0.13214	0.02867	0.04878	0.08672	0.03771	0.08307	0.01272	0.07974	0.0346	0.07775	0.2015	0.32738	0.4153	0.36329	0.32107	0.0429	0.66322	0.58948	0.0172	0.45104	0.26	0.23675	0.49532	0.59276	0.49694	0.54543	0.31496	0.51756	0.45063	0.34733	0.30715	0.29943	0.30972	0.34752	0.24949	0.21475
VVD2	0.6531	0.71586	0.69272	0.71202	0.79806	0.75728	0.34383	0.10046	0.02014	0.0634	0.01447	0.04045	0.0164	0.04199	0.05	0.07626	0.05903	0.0783	0.03152	0.02628	0.06237	0.05785	0.05326	1.5e-05	0.11197	0.19859	0.17358	0.14456	0.00255	0.61029	0.60767	0.17744	0.60209	0.25613	0.14287	0.4048	0.53553	0.58107	0.67146	0.30342	0.58179	0.5359	0.49264	0.45198	0.40661	0.42658	0.48389	0.37	0.30787
VVD2	0.64664	0.71022	0.68759	0.70534	0.79345	0.7426	0.31782	0.0821	0.038	0.04342	0.00543	0.02298	0.00323	0.05708	0.03914	0.07997	0.06399	0.07978	0.03295	0.02408	0.05923	0.04346	0.03551	0.02392	0.13595	0.22548	0.19795	0.16816	0.02302	0.59589	0.59422	0.18069	0.60338	0.274	0.16131	0.40872	0.54749	0.58884	0.67994	0.31831	0.57995	0.53329	0.48622	0.44386	0.40072	0.4245	0.47998	0.36574	0.30835
VVD2	0.58329	0.65011	0.647	0.68311	0.76505	0.73606	0.28015	0.01696	0.08788	0.00201	0.05412	0.01831	0.01278	0.10621	0.02421	0.08045	0.09539	0.0816	0.03927	0.02063	0.06217	0.00289	0.02423	0.11781	0.2374	0.33002	0.29075	0.25453	0.04844	0.62195	0.58612	0.12409	0.5555	0.29498	0.22551	0.47352	0.5934	0.5567	0.63691	0.32287	0.55359	0.49123	0.41697	0.37586	0.34892	0.36881	0.4176	0.30883	0.26345
VVD2	0.56365	0.62986	0.6352	0.67739	0.74758	0.71349	0.27176	0.00483	0.10111	0.02846	0.10121	0.06945	0.0548	0.16133	0.01879	0.10988	0.13357	0.10445	0.02548	0.03113	0.04365	0.04686	0.07174	0.17956	0.29105	0.37499	0.31707	0.27459	0.05519	0.61528	0.55932	0.11243	0.53917	0.31997	0.2711	0.48551	0.60977	0.526	0.60447	0.32558	0.51569	0.44805	0.35838	0.30985	0.28877	0.3105	0.35742	0.25048	0.21406
VVD2	0.43371	0.50746	0.53551	0.60537	0.65646	0.65277	0.19973	0.09104	0.18027	0.11522	0.201	0.16398	0.10653	0.24909	0.06782	0.11876	0.17543	0.09932	0.03596	0.027	0.02695	0.13382	0.18129	0.32961	0.4364	0.50893	0.42258	0.36952	0.08341	0.61386	0.5062	0.02466	0.43502	0.3345	0.34834	0.53405	0.63431	0.45043	0.49648	0.31874	0.44215	0.36021	0.23268	0.17956	0.18364	0.19909	0.23266	0.13878	0.12231
VVD2	0.4108	0.4874	0.5346	0.60331	0.63177	0.63463	0.24423	0.05595	0.15717	0.14016	0.2477	0.22846	0.18213	0.34145	0.15873	0.20351	0.2788	0.19036	0.04516	0.09407	0.03077	0.21028	0.24478	0.39186	0.47497	0.52233	0.40235	0.33496	0.03085	0.62115	0.47676	0.0072	0.40866	0.34711	0.40198	0.54091	0.62059	0.39712	0.44092	0.26466	0.36933	0.25631	0.11485	0.05906	0.06374	0.07258	0.10039	0.00116	0.0176
VVD2	0.39628	0.47393	0.52889	0.60383	0.61692	0.60749	0.24461	0.05364	0.1603	0.16588	0.28528	0.2724	0.22102	0.38601	0.20032	0.23249	0.31339	0.21711	0.06518	0.10822	0.05143	0.24432	0.27926	0.43204	0.50007	0.5383	0.3979	0.32626	0.02946	0.60655	0.45768	0.000988	0.39258	0.35892	0.42975	0.53568	0.61649	0.38004	0.42303	0.25928	0.33915	0.21735	0.0698	0.01007	0.01561	0.02434	0.05017	0.04904	0.06487
VVD2	0.45914	0.54621	0.58617	0.66779	0.70192	0.68311	0.27374	0.00586	0.10338	0.0734	0.18935	0.17099	0.11485	0.26704	0.09125	0.12954	0.18844	0.11539	0.04567	0.0063	0.05846	0.11215	0.15693	0.32102	0.39993	0.47012	0.35142	0.2945	0.05522	0.60906	0.5269	0.00121	0.41804	0.3172	0.33978	0.47816	0.59176	0.44785	0.48927	0.28081	0.40181	0.30464	0.17095	0.11799	0.11039	0.13081	0.16058	0.05496	0.03534
VVD2	0.40315	0.49758	0.5372	0.63573	0.68568	0.69688	0.24427	0.03037	0.09873	0.03424	0.13947	0.11125	0.03934	0.20226	0.01923	0.04951	0.1169	0.0392	0.12397	0.08822	0.13619	0.05012	0.105	0.29183	0.38738	0.47263	0.37559	0.32654	0.06161	0.6201	0.54174	0.05042	0.36989	0.2785	0.2937	0.45073	0.57853	0.43783	0.46658	0.27968	0.39309	0.30922	0.17176	0.13081	0.1292	0.15149	0.1753	0.07616	0.06545
VVD2	0.28113	0.37063	0.42857	0.54649	0.58038	0.60022	0.17615	0.0949	0.14384	0.09502	0.20324	0.17599	0.09216	0.27853	0.07822	0.08481	0.18466	0.07746	0.08494	0.05622	0.0958	0.13463	0.19115	0.39563	0.48268	0.55052	0.44034	0.38129	0.06112	0.59574	0.46724	0.09848	0.28911	0.29441	0.34872	0.45888	0.57281	0.35237	0.36796	0.24403	0.28169	0.18234	0.03095	0.00478	0.0123	0.02879	0.04293	0.04074	0.03516
VVD2	0.2697	0.35652	0.4126	0.53031	0.55955	0.58246	0.17616	0.0985	0.15287	0.11881	0.22209	0.19406	0.11814	0.29636	0.10344	0.10981	0.20706	0.10217	0.05966	0.03224	0.06832	0.15688	0.21084	0.40136	0.48309	0.53869	0.42595	0.36469	0.04167	0.59725	0.45187	0.09018	0.29065	0.29285	0.34665	0.44811	0.57318	0.35089	0.36745	0.25877	0.28001	0.17805	0.02994	0.01077	0.00734	0.01975	0.03326	0.05085	0.0474
VVD2	0.46093	0.55569	0.57546	0.66824	0.72628	0.73542	0.30251	0.03298	0.05525	0.01134	0.07624	0.0474	0.00291	0.12923	0.01831	0.03054	0.07262	0.02929	0.13141	0.1011	0.1543	0.0196	0.02634	0.1756	0.27277	0.35275	0.26966	0.229	0.01152	0.62854	0.56837	0.00411	0.4183	0.23303	0.20056	0.38068	0.5462	0.50921	0.54591	0.30995	0.45952	0.37313	0.26443	0.22521	0.20741	0.22544	0.25066	0.14095	0.11189
VVD2	0.55778	0.63834	0.6136	0.67048	0.7771	0.76225	0.33117	0.14042	0.0643	0.18484	0.15239	0.18683	0.17583	0.11758	0.19351	0.09518	0.10265	0.06541	0.20044	0.18521	0.25827	0.23752	0.21631	0.12599	0.00727	0.10536	0.10669	0.10038	0.00467	0.55972	0.59484	0.1134	0.5094	0.157	0.00124	0.23175	0.44306	0.60402	0.67788	0.29986	0.54633	0.49684	0.46676	0.45516	0.40497	0.43275	0.46701	0.35325	0.30206
VVD2	0.52885	0.6025	0.54494	0.58882	0.71919	0.72041	0.26369	0.10793	0.05419	0.2237	0.23359	0.28667	0.28976	0.27825	0.32536	0.23047	0.28101	0.21685	0.31286	0.27933	0.32867	0.35812	0.32013	0.25538	0.12173	0.00788	0.0603	0.08052	0.04729	0.4695	0.56335	0.12982	0.47692	0.0813	0.13037	0.14061	0.3804	0.61497	0.69528	0.35018	0.60332	0.61397	0.61042	0.60444	0.55576	0.58711	0.61939	0.52655	0.47948
VVD2	0.53116	0.60165	0.53142	0.565	0.70628	0.71858	0.25555	0.11079	0.05451	0.25061	0.27662	0.33775	0.34242	0.35681	0.38749	0.28756	0.36064	0.27951	0.36038	0.31556	0.3592	0.41803	0.37388	0.32659	0.18023	0.04188	0.03082	0.06044	0.07001	0.42838	0.5548	0.13859	0.47434	0.04287	0.19525	0.11226	0.32704	0.64181	0.70183	0.34213	0.63927	0.65368	0.66571	0.66839	0.612	0.63872	0.66893	0.57777	0.51865
VVD2	0.5819	0.65158	0.58747	0.61337	0.7451	0.74131	0.28048	0.10311	0.02266	0.18729	0.19501	0.24755	0.24184	0.24041	0.28348	0.17863	0.24212	0.17355	0.26294	0.21613	0.27046	0.31358	0.27959	0.23429	0.09618	0.02933	0.07195	0.07992	0.0642	0.47748	0.57985	0.16256	0.52048	0.09326	0.1199	0.17001	0.38068	0.63718	0.71543	0.34614	0.64884	0.65433	0.64841	0.63653	0.58202	0.61121	0.6487	0.54781	0.48856
VVD2	0.6186	0.69063	0.63626	0.66246	0.78428	0.77404	0.32016	0.12983	0.05045	0.20436	0.19664	0.24083	0.2294	0.21363	0.26531	0.14855	0.20219	0.13907	0.23387	0.18956	0.25758	0.29699	0.27044	0.22021	0.0888	0.03263	0.06574	0.07134	0.0215	0.53281	0.62746	0.13633	0.52584	0.09981	0.08947	0.19808	0.40247	0.61686	0.70181	0.3193	0.62399	0.63104	0.62132	0.60737	0.5518	0.58079	0.62706	0.52323	0.46305
VVD2	0.68958	0.74863	0.70165	0.71535	0.82149	0.76169	0.3823	0.21054	0.11441	0.2265	0.19783	0.22295	0.17134	0.15525	0.19346	0.05475	0.10381	0.02728	0.13375	0.10593	0.19764	0.25582	0.25977	0.22577	0.11549	0.007	0.00953	0.01093	0.01543	0.51966	0.60095	0.20943	0.59672	0.15634	0.03402	0.20381	0.40989	0.6077	0.71883	0.28166	0.57538	0.56485	0.56871	0.54954	0.48318	0.51651	0.57179	0.45927	0.3935
VVD2	0.59202	0.66707	0.62159	0.65272	0.77257	0.76374	0.29995	0.09432	0.01577	0.16651	0.15225	0.20055	0.19677	0.1638	0.23272	0.12381	0.16075	0.11253	0.21648	0.1687	0.23728	0.24598	0.21898	0.15503	0.02002	0.10125	0.1238	0.12029	0.04456	0.54093	0.61035	0.12855	0.51684	0.1247	0.05324	0.2206	0.41651	0.60477	0.68915	0.31563	0.60563	0.60048	0.57775	0.56206	0.51549	0.54435	0.58547	0.48237	0.42877
VVD2	0.4365	0.52507	0.47205	0.52875	0.67531	0.74486	0.18058	0.02275	0.05372	0.17942	0.19978	0.276	0.33494	0.29386	0.38301	0.30926	0.34012	0.31082	0.39516	0.33124	0.36926	0.34408	0.27277	0.17269	0.000947	0.15177	0.21576	0.22904	0.12681	0.51277	0.6138	0.00358	0.37315	0.02805	0.14874	0.19408	0.37325	0.5859	0.62925	0.33846	0.63131	0.65027	0.61124	0.61938	0.59157	0.61426	0.63707	0.55534	0.51659
VVD2	0.35934	0.44248	0.38971	0.45055	0.59004	0.67898	0.10021	0.11913	0.14144	0.08898	0.12651	0.22097	0.29899	0.26308	0.36153	0.30418	0.33627	0.32066	0.39286	0.31214	0.33321	0.29061	0.20622	0.10601	0.07061	0.21654	0.28057	0.28854	0.1644	0.49665	0.56384	0.00525	0.33012	0.02069	0.15199	0.18981	0.37067	0.55612	0.58819	0.37732	0.6362	0.66861	0.62136	0.62013	0.61038	0.63064	0.64752	0.5773	0.54995
VVD2	0.25399	0.32814	0.26953	0.33647	0.48886	0.60364	0.00271	0.17791	0.15769	0.1193	0.19071	0.30371	0.40507	0.38731	0.47922	0.43341	0.47528	0.45132	0.49822	0.41307	0.42	0.38832	0.28214	0.17511	0.01638	0.17917	0.28664	0.32078	0.20768	0.40939	0.48761	0.01506	0.27241	0.00128	0.19312	0.17364	0.34291	0.55657	0.55482	0.4273	0.63999	0.68451	0.65579	0.66435	0.66664	0.68423	0.68963	0.64058	0.62275
VVD2	0.30656	0.38374	0.33213	0.40262	0.55262	0.63934	0.04971	0.13365	0.12376	0.12962	0.18882	0.28927	0.37048	0.33804	0.43362	0.3761	0.39643	0.3729	0.44562	0.38243	0.40509	0.36233	0.27356	0.15968	0.02213	0.17952	0.27009	0.29578	0.16704	0.45682	0.51644	0.00799	0.31777	0.0288	0.14951	0.19105	0.38861	0.56959	0.59257	0.43223	0.63984	0.66978	0.63612	0.64094	0.63598	0.65802	0.66784	0.60693	0.58818
VVD2	0.52836	0.60272	0.55266	0.59562	0.72806	0.74863	0.2356	0.02684	0.03309	0.15739	0.17221	0.24155	0.26223	0.23827	0.31302	0.21542	0.25656	0.20999	0.30506	0.24863	0.30215	0.30922	0.25754	0.18145	0.02774	0.10685	0.15666	0.16942	0.08151	0.51248	0.57518	0.12597	0.50428	0.13647	0.05073	0.26876	0.45919	0.64951	0.70746	0.40406	0.67439	0.66713	0.64314	0.6274	0.5905	0.61316	0.64449	0.54993	0.4998
VVD2	0.51414	0.59287	0.55104	0.60554	0.73183	0.75341	0.24691	0.03608	0.022	0.15809	0.16142	0.22703	0.24998	0.21359	0.29523	0.20227	0.23347	0.19527	0.30203	0.25386	0.30776	0.29666	0.24548	0.15592	0.00656	0.12458	0.1631	0.17212	0.06911	0.52865	0.57712	0.10498	0.49036	0.14321	0.03509	0.26395	0.46301	0.63365	0.69185	0.3936	0.64245	0.6268	0.59534	0.5803	0.5457	0.56891	0.59845	0.50186	0.4544
VVD2	0.56871	0.64393	0.6058	0.65662	0.77268	0.76632	0.31262	0.11445	0.04072	0.18907	0.17426	0.22184	0.21919	0.18653	0.25389	0.14924	0.1851	0.13525	0.25365	0.21891	0.28251	0.2894	0.2555	0.1783	0.04768	0.07252	0.09477	0.10041	0.02353	0.5318	0.58569	0.12768	0.52272	0.15152	0.03002	0.23498	0.44473	0.63561	0.70261	0.35885	0.60962	0.58195	0.55762	0.54127	0.49445	0.5204	0.5556	0.44963	0.39521
VVD2	0.62394	0.69405	0.65816	0.70259	0.80577	0.76803	0.37935	0.19853	0.11316	0.22832	0.19825	0.22667	0.19119	0.16288	0.21177	0.09028	0.12857	0.0642	0.1886	0.17149	0.25098	0.28053	0.27096	0.21137	0.10149	0.00549	0.01537	0.01593	0.03729	0.53946	0.60077	0.14421	0.54253	0.14259	0.03982	0.18318	0.41029	0.61041	0.69786	0.3093	0.55999	0.53364	0.52375	0.50505	0.44612	0.47731	0.52288	0.40991	0.35056
VVD2	0.61036	0.67862	0.63756	0.67687	0.79102	0.76056	0.34524	0.16854	0.09522	0.23063	0.21707	0.25469	0.22071	0.19494	0.24298	0.11804	0.15544	0.08858	0.20227	0.18096	0.26293	0.29577	0.28472	0.22747	0.10498	0.01131	0.04032	0.04423	0.01779	0.5375	0.60696	0.14329	0.5346	0.12859	0.05992	0.18598	0.40822	0.60915	0.69963	0.31222	0.57629	0.56272	0.55979	0.54734	0.49077	0.52211	0.56857	0.46109	0.40392
VVD2	0.51714	0.60652	0.57645	0.64928	0.76527	0.79895	0.31987	0.11019	0.06878	0.23703	0.22313	0.27313	0.28689	0.23453	0.31317	0.21396	0.23321	0.19633	0.31271	0.28088	0.34682	0.3338	0.29395	0.19717	0.06052	0.06628	0.09893	0.1039	0.02462	0.6032	0.6644	0.00378	0.41508	0.05117	0.10295	0.17249	0.39215	0.57051	0.62999	0.31532	0.56651	0.56521	0.53812	0.53144	0.49035	0.51717	0.55553	0.45702	0.41263
VVD2	0.4688	0.55326	0.49396	0.55038	0.69425	0.74828	0.25153	0.09046	0.06857	0.28951	0.3197	0.38588	0.40522	0.39411	0.44001	0.34444	0.39591	0.33106	0.41507	0.37492	0.4236	0.4554	0.40494	0.33321	0.17655	0.03016	0.05569	0.08424	0.02688	0.50439	0.62629	0.02195	0.37516	0.03878	0.24426	0.07862	0.29727	0.58657	0.63734	0.32248	0.6121	0.64343	0.64804	0.66034	0.61281	0.6389	0.67073	0.58645	0.53865
VVD2	0.36384	0.46385	0.41926	0.49893	0.64026	0.74308	0.20242	0.01973	0.03195	0.269	0.30226	0.37664	0.42841	0.38224	0.4575	0.38343	0.40314	0.37221	0.4575	0.4132	0.45584	0.43575	0.37216	0.26962	0.104	0.04516	0.13469	0.15631	0.00898	0.57701	0.67644	0.11181	0.24658	0.11566	0.26909	0.06773	0.28083	0.50715	0.54584	0.28679	0.55809	0.60264	0.59008	0.61197	0.58029	0.6028	0.63175	0.5591	0.52753
VVD2	0.37007	0.46343	0.40975	0.46783	0.62907	0.74253	0.18532	0.01518	0.02714	0.2919	0.35032	0.4303	0.47167	0.44042	0.50069	0.41349	0.44115	0.39566	0.46519	0.41438	0.46382	0.47121	0.41167	0.32863	0.14414	0.01511	0.1342	0.16259	0.02103	0.56476	0.68156	0.09004	0.26135	0.14004	0.31301	0.07301	0.25786	0.5219	0.56362	0.26424	0.59022	0.63078	0.63853	0.67684	0.6355	0.65135	0.68169	0.60788	0.56353
VVD2	0.41432	0.50826	0.44791	0.49658	0.647	0.76145	0.24874	0.0762	0.06462	0.30718	0.36131	0.43087	0.46037	0.45174	0.48982	0.39808	0.44794	0.38745	0.45489	0.40313	0.44844	0.4885	0.43484	0.37855	0.21108	0.06764	0.04016	0.069	0.03303	0.56461	0.69089	0.08151	0.27086	0.17245	0.35382	0.03397	0.22114	0.53526	0.5683	0.25811	0.6074	0.64667	0.66429	0.69547	0.64474	0.65638	0.68823	0.60786	0.54969
VVD2	0.47529	0.56067	0.48974	0.51291	0.64345	0.73783	0.34853	0.20795	0.16752	0.36298	0.41394	0.46028	0.44611	0.47965	0.46403	0.35494	0.43528	0.33738	0.39241	0.3594	0.41299	0.52211	0.49572	0.49431	0.36206	0.24659	0.14712	0.11388	0.12518	0.50858	0.6644	0.0374	0.28463	0.22712	0.42781	0.0698	0.11774	0.51096	0.55843	0.20167	0.57955	0.62097	0.67077	0.69766	0.62295	0.63099	0.6693	0.58232	0.50264
VVD2	0.52651	0.61547	0.55741	0.58912	0.67844	0.74891	0.45447	0.29375	0.22261	0.33671	0.34591	0.36962	0.33765	0.37062	0.34638	0.24098	0.32242	0.22501	0.29688	0.28361	0.34214	0.45304	0.44239	0.45148	0.36195	0.28586	0.2427	0.22377	0.21691	0.52832	0.65276	0.02979	0.30256	0.20336	0.38121	0.09007	0.12096	0.49171	0.53964	0.18824	0.52809	0.55212	0.58917	0.59246	0.51281	0.51944	0.55984	0.46143	0.37829
VVD2	0.48445	0.56291	0.4961	0.52069	0.63027	0.70603	0.41548	0.30591	0.26021	0.41509	0.45078	0.47435	0.43417	0.48171	0.43718	0.32538	0.41409	0.3014	0.36115	0.34704	0.40307	0.54208	0.53531	0.55221	0.45309	0.36015	0.2725	0.23966	0.2138	0.48315	0.64238	0.04918	0.25645	0.26989	0.47609	0.17128	0.0352	0.46685	0.50861	0.13986	0.4894	0.52719	0.59515	0.62297	0.53835	0.54792	0.5867	0.49913	0.41536
VVD2	0.47173	0.55977	0.50476	0.55417	0.66314	0.75002	0.41277	0.27455	0.2376	0.39687	0.42144	0.44992	0.42895	0.44593	0.43092	0.32843	0.39541	0.30534	0.38175	0.36538	0.42082	0.51991	0.50493	0.49031	0.38225	0.28432	0.21134	0.18513	0.22264	0.55965	0.69366	0.10627	0.23575	0.26348	0.45092	0.14349	0.07685	0.45981	0.5008	0.14511	0.47978	0.51154	0.55924	0.58605	0.50923	0.51909	0.55815	0.46793	0.39348
VVD2	0.48399	0.58374	0.54956	0.62187	0.72316	0.80744	0.41788	0.23004	0.18506	0.33422	0.3292	0.3607	0.35961	0.33559	0.36527	0.2709	0.30788	0.25005	0.35557	0.33684	0.3968	0.43509	0.40913	0.35303	0.24024	0.1389	0.10113	0.09007	0.19586	0.63567	0.72193	0.11805	0.27486	0.17003	0.32166	0.02593	0.19596	0.48893	0.52695	0.18272	0.48973	0.49239	0.50281	0.51737	0.45234	0.46369	0.50021	0.3997	0.33407
VVD2	0.45754	0.55105	0.51629	0.58513	0.67622	0.76012	0.43496	0.27423	0.23219	0.35876	0.35629	0.37752	0.35934	0.35149	0.3572	0.2599	0.30216	0.23303	0.33401	0.32713	0.38668	0.44856	0.43519	0.3996	0.3054	0.22251	0.18154	0.16797	0.26059	0.61524	0.69699	0.13192	0.23485	0.21958	0.37608	0.11111	0.1221	0.43921	0.4767	0.13997	0.42462	0.4342	0.46324	0.48218	0.41378	0.42267	0.45888	0.36375	0.29691
VVD2	0.41836	0.50156	0.4589	0.52073	0.60606	0.69268	0.43273	0.30815	0.27402	0.38581	0.39723	0.41103	0.37683	0.39695	0.36868	0.27095	0.33187	0.24495	0.32631	0.32515	0.37736	0.47794	0.47606	0.47379	0.39627	0.33279	0.27783	0.25577	0.31959	0.56943	0.6603	0.14688	0.18178	0.28851	0.46458	0.22562	0.01476	0.38036	0.41238	0.09637	0.36304	0.39085	0.44614	0.47135	0.40041	0.40619	0.44089	0.35678	0.2891
VVD2	0.41348	0.51527	0.50349	0.60304	0.67542	0.76131	0.43666	0.25136	0.21635	0.31687	0.28547	0.3015	0.30065	0.25843	0.29379	0.21685	0.23413	0.19483	0.31552	0.31366	0.36732	0.37767	0.35828	0.29015	0.20804	0.13893	0.13371	0.13023	0.28847	0.66625	0.69903	0.19256	0.20008	0.18204	0.3039	0.09101	0.16059	0.39297	0.42103	0.14027	0.34981	0.34692	0.34408	0.35303	0.30171	0.31199	0.34407	0.25	0.19959
VVD2	0.38576	0.49024	0.50406	0.62219	0.6675	0.7389	0.42128	0.2043	0.16933	0.22966	0.16386	0.17544	0.18938	0.11223	0.18407	0.12067	0.10854	0.10576	0.24625	0.24445	0.2988	0.25134	0.22826	0.12594	0.05984	0.00872	0.04641	0.06154	0.28481	0.7045	0.67559	0.21634	0.19547	0.0965	0.16283	0.00174	0.24238	0.35194	0.37482	0.14793	0.28526	0.26667	0.22592	0.21858	0.1863	0.19729	0.22863	0.13631	0.10154
VVD2	0.30414	0.38813	0.38373	0.48153	0.50692	0.5862	0.42388	0.278	0.25474	0.27315	0.23439	0.23033	0.21099	0.19847	0.19554	0.13802	0.16431	0.12323	0.22593	0.23937	0.27466	0.3086	0.30823	0.27978	0.25616	0.24798	0.2635	0.26309	0.40488	0.58605	0.57494	0.2324	0.08319	0.24209	0.33969	0.23388	0.02677	0.23339	0.24989	0.07122	0.17193	0.19009	0.20308	0.20197	0.16448	0.16703	0.19264	0.12345	0.08599
VVD2	0.17584	0.26161	0.27701	0.39465	0.4026	0.50974	0.38538	0.24834	0.25188	0.24853	0.2006	0.19118	0.1923	0.15828	0.16748	0.13688	0.14178	0.1274	0.22561	0.24499	0.26659	0.26733	0.26174	0.21687	0.21129	0.2233	0.2522	0.25572	0.45394	0.57918	0.53519	0.33907	0.04732	0.28523	0.34235	0.28707	0.03596	0.10613	0.10118	0.00318	0.03285	0.05527	0.05679	0.05942	0.03683	0.0345	0.05167	1.7e-05	0.01856
VVD2	0.06699	0.15105	0.22611	0.36631	0.33214	0.43013	0.30707	0.11892	0.13962	0.0813	0.01141	0.032	0.00244	0.13534	0.04025	0.04319	0.13348	0.05849	0.06709	0.0985	0.13383	5.8e-05	0.00476	0.12567	0.11688	0.08299	0.00759	0.0499	0.44788	0.67822	0.50717	0.43386	0.11866	0.15321	0.05989	0.07007	0.13122	0.02467	0.03062	0.05255	0.12457	0.1426	0.2076	0.21696	0.20357	0.20748	0.18907	0.23618	0.21859
VVD2	0.00315	0.07065	0.15044	0.27763	0.21785	0.29686	0.27614	0.11924	0.15148	0.0454	0.04656	0.07825	0.07114	0.19639	0.12248	0.1163	0.21463	0.14019	0.02814	0.02228	0.05726	0.06749	0.05047	0.14622	0.10387	0.04227	0.05916	0.10555	0.48097	0.59525	0.40158	0.41228	0.17526	0.16007	0.03784	0.12127	0.07864	0.12385	0.12723	0.08084	0.21491	0.22585	0.28675	0.30336	0.27755	0.28049	0.26592	0.29611	0.26743
[truncated: 285 more rows]
[truncated: 544 more columns]

## Sheet: Prod1 Dark RMSD
Residue	10ns RMSD	20ns	30ns	40ns	50ns	60ns	70ns	80ns	90ns	100ns		Avg
[truncated: 593 more rows]

## Sheet: Prod2 Dark RMSD 
Residue	10ns RMSD	20ns	30ns	40ns	50ns	60ns	70ns	80ns	90ns	100ns		Avg
[truncated: 593 more rows]

## Sheet: Prod3 Dark RMSD 
Residue	10ns RMSD	20ns	30ns	40ns	50ns	60ns	70ns	80ns	90ns	100ns		Avg
[truncated: 593 more rows]

[truncated: 4 more sheets: Prod1 Light RMSD  , Prod2 Light RMSD  , Prod3 Light RMSD  , Src Catalytic Domain]
