# Supplementary material for: Light-regulated allosteric switch enables temporal and subcellular control of enzyme activity
Source: eLife. 2020 Sep 23;9:e60647. doi: 10.7554/eLife.60647 (PMC7577742; doi:10.7554/eLife.60647)
Supplement: Figure 2—source data 1. [file elife-60647-fig2-data1.xlsx]

## Sheet: three_replicate_phosphopeptides
Annotated Sequence	Modifications	Protein Accessions	Protein Descriptions	Gene Name	Sum of 10 s ctrl	Sum of 30 s ctrl	Sum of 1 min ctrl	Sum of 5 min ctrl	Sum of 60 min ctrl	Sum of 0 s	Sum of 10 s	Sum of 30 s	Sum of 1 min	Sum of 5 min	Sum of 60 min	Sum of 10 s ctrl2	Sum of 30 s ctrl2	Sum of 1 min ctrl2	Sum of 5 min ctrl2	Sum of 60 min ctrl2	Sum of 0 s2	Sum of 10 s2	Sum of 30 s2	Sum of 1 min2	Sum of 5 min2	Sum of 60 min2	Sum of 10 s ctrl3	Sum of 30 s ctrl3	Sum of 1 min ctrl3	Sum of 5 min ctrl3	Sum of 60 min ctrl3	Sum of 0 s3	Sum of 10 s3	Sum of 30 s3	Sum of 1 min3	Sum of 5 min3	Sum of 60 min3
aAAGYPDPYsR	S10	P58107	Epiplakin OS=Homo sapiens OX=9606 GN=EPPK1 PE=1 SV=3	EPPK1	0.619945	0.481916	0.0352513	1.04084	0.405101	1	0.454951	0.856232	2.05535	2.16055	29.0536	0.745486	0.765863	0.701101	0.803056	1.83273	1	0.755529	0.954837	1.36252	2.00143	16.7705	0.993924	0.102819	0.102819	0.961296	1.07195	1	2.08792	1.74728	2.14614	4.94936	27.8797
aAVPSGASTGIyEALELR	Y12	P13929; P09104; P06733	Beta-enolase OS=Homo sapiens OX=9606 GN=ENO3 PE=1 SV=5; Gamma-enolase OS=Homo sapiens OX=9606 GN=ENO2 PE=1 SV=3; Alpha-enolase OS=Homo sapiens OX=9606 GN=ENO1 PE=1 SV=2	ENO3	0.717008	0.814904	0.858922	0.801933	0.776341	1	0.935827	1.00457	0.978329	1.11522	5.13608	0.427188	0.392744	0.51544	0.744413	0.918225	1	0.914164	0.76148	0.988666	1.12968	5.38017	0.351676	0.245856	0.420209	0.80274	0.564292	1	0.885542	0.929838	1.01746	1.3207	6.03994
aAVPSGASTGIyEALELRDNDk	Y12; K22	P06733	Alpha-enolase OS=Homo sapiens OX=9606 GN=ENO1 PE=1 SV=2	ENO1	0.752445	0.812784	0.741052	0.772698	0.8007	1	1.01251	0.837646	0.921808	1.18491	3.94123	0.784652	0.708455	0.699754	0.86231	0.842782	1	0.795375	0.704021	0.946025	0.937651	4.99238	0.679707	0.58038	0.720203	0.851659	0.816465	1	1.04655	0.972589	0.901992	1.29037	5.23661
aDyDTLSLR	Y3	Q9Y446	Plakophilin-3 OS=Homo sapiens OX=9606 GN=PKP3 PE=1 SV=1	PKP3	1.03646	1.07601	1.13951	0.992451	1.14898	1	1.22188	1.07066	1.08843	2.22102	4.84237	1.04693	0.795737	0.937862	0.731386	1.40934	1	1.02074	0.908357	1.08635	1.89019	4.65995	1.07724	0.85247	0.863841	1.11708	1.40597	1	1.0353	1.17756	1.27727	2.87016	6.41052
aEDGSVIDyELIDQDAR	Y9	P07355	Annexin A2 OS=Homo sapiens OX=9606 GN=ANXA2 PE=1 SV=2	ANXA2	0.73559	0.705614	0.835224	1.20294	1.06718	1	1.10896	0.85701	0.747156	1.33413	2.84899	0.64738	0.403734	0.615945	0.698845	1.30751	1	0.719339	0.568325	0.699505	1.031	3.49059	0.612697	0.397697	0.748943	1.07354	0.966124	1	1.1311	0.957321	1.0076	2.17656	2.8217
aGkGESAGyMEPYEAQR	K3; Y9	Q15464	SH2 domain-containing adapter protein B OS=Homo sapiens OX=9606 GN=SHB PE=1 SV=2	SHB	1.5881	1.30798	1.28084	1.12576	1.54993	1	1.24361	1.28826	1.18058	1.29667	1.82958	0.642461	1.11576	1.11612	0.610017	1.28624	1	1.08205	0.915355	0.874676	0.851235	1.25655	1.60554	1.40014	1.48005	1.24906	1.81546	1	1.29571	1.6991	0.839663	1.1485	2.28815
aGLQTADkyAALANLDNIFSAGQGGDQGSGFGTTGk	K8; Y9; K36	P52594	Arf-GAP domain and FG repeat-containing protein 1 OS=Homo sapiens OX=9606 GN=AGFG1 PE=1 SV=2	AGFG1	0.784965	0.761776	0.973878	1.09313	0.879433	1	0.950523	0.94664	0.814152	1.142	1.28204	0.812268	0.538301	0.860154	0.772591	0.587623	1	0.943171	0.658064	1.13895	1.16641	1.8332	0.641286	0.747539	0.952863	1.07325	0.821964	1	1.07173	1.34816	1.07128	1.25653	1.4442
aGVDyAPNLPPFPSPADVk	Y5; K19	Q68CZ2	Tensin-3 OS=Homo sapiens OX=9606 GN=TNS3 PE=1 SV=2	TNS3	0.898015	0.81418	0.854975	0.800194	0.795865	1	1.36411	1.27892	0.906021	4.65033	6.28427	0.634189	0.279438	0.65874	0.55309	0.628352	1	0.750522	0.538709	1.46756	3.23424	6.5586	0.605911	0.295033	0.766807	0.84116	0.953896	1	1.39418	1.04048	1.16431	4.43629	5.1004
aHQSESyLPIGck	Y7; C12; K13	O75815	Breast cancer anti-estrogen resistance protein 3 OS=Homo sapiens OX=9606 GN=BCAR3 PE=1 SV=1	BCAR3	0.636607	0.347722	0.55937	0.718072	0.795903	1	0.875866	1.08104	1.05861	4.24883	3.39443	0.584365	0.600972	0.36287	0.675361	0.719938	1	1.16375	0.766062	2.27788	4.02048	6.11713	0.246269	0.356525	0.489861	0.466515	0.438243	1	1.19892	1.20686	0.70656	4.65366	3.5976
aLDyYMLR	Y4	Q9Y490	Talin-1 OS=Homo sapiens OX=9606 GN=TLN1 PE=1 SV=3	TLN1	1.2347	1.1175	0.966711	0.869051	1.06582	1	1.73785	1.78539	1.44898	1.45459	2.1174	0.822902	1.07643	0.961455	0.571507	0.910249	1	1.43924	1.3183	1.25705	1.16655	1.77748	1.16308	0.869577	0.854327	0.819715	1.25686	1	1.62659	1.90036	1.19075	1.48684	2.79664
aLELDSNLyR	Y9	P35579	Myosin-9 OS=Homo sapiens OX=9606 GN=MYH9 PE=1 SV=4	MYH9	1.28633	1.01839	1.37383	1.05334	1.01825	1	1.74469	1.58742	1.4676	1.3569	1.72947	1.00921	1.05398	0.966493	0.712848	1.18869	1	1.53476	1.55333	1.60761	0.944122	2.29491	1.44445	1.12414	1.16462	0.890954	1.11478	1	1.38981	1.67264	1.40281	1.45395	1.94835
aLLyLcGGDD	Y4; C6	A6NMY6; P07355	Putative annexin A2-like protein OS=Homo sapiens OX=9606 GN=ANXA2P2 PE=5 SV=2; Annexin A2 OS=Homo sapiens OX=9606 GN=ANXA2 PE=1 SV=2	ANXA2P2	0.932253	0.874466	0.757264	0.925066	0.860155	1	0.897746	1.14428	0.955879	1.13496	1.73657	1.4236	0.83826	1.33338	1.11268	2.47072	1	1.69707	1.1961	1.4881	1.23906	2.60309	0.532055	0.652625	0.65068	0.92658	0.599315	1	0.78329	0.991343	0.824234	1.89696	1.44442
aLyDNVAESPDELSFR	Y3	P56945	Breast cancer anti-estrogen resistance protein 1 OS=Homo sapiens OX=9606 GN=BCAR1 PE=1 SV=2	BCAR1	0.860495	0.525117	0.30359	0.542193	0.818916	1	1.51947	1.02587	1.95621	1.95212	9.41746	0.488288	0.575007	0.771762	0.594718	0.833411	1	1.27334	1.0022	1.67401	1.53421	11.1804	0.337362	0.383107	0.326144	0.639766	0.705035	1	1.23038	0.999074	0.868697	1.18797	9.90638
aLyLIATNGTPELQNPEk	Y3; K18	Q13153; Q13177	Serine/threonine-protein kinase PAK 1 OS=Homo sapiens OX=9606 GN=PAK1 PE=1 SV=2; Serine/threonine-protein kinase PAK 2 OS=Homo sapiens OX=9606 GN=PAK2 PE=1 SV=3	PAK1	0.758678	0.969329	0.982367	0.782269	1.01158	1	1.32329	0.985117	1.24566	4.06558	9.4177	0.595008	0.545982	0.539307	0.552126	0.843477	1	0.87096	0.919268	1.39533	3.19619	9.39746	0.518404	0.38402	0.751308	0.618004	0.759053	1	0.909344	0.892528	1.16231	3.81057	7.91565
aPYTcGGDSDQyVLMSSPVGR	C5; Y12	Q9Y4H2	Insulin receptor substrate 2 OS=Homo sapiens OX=9606 GN=IRS2 PE=1 SV=2	IRS2	1.47707	1.41788	1.57811	1.33587	1.38211	1	1.80336	2.19951	2.16337	1.75128	2.00354	1.63772	1.99338	1.23052	1.04371	2.16694	1	2.74858	2.26427	1.88048	1.87762	5.70625	1.22246	0.54169	0.869068	0.821913	0.927984	1	1.25251	1.43895	0.685937	1.18099	1.31233
aQQGLyQVPGPSPQFQSPPAk	Y6; K21	P56945	Breast cancer anti-estrogen resistance protein 1 OS=Homo sapiens OX=9606 GN=BCAR1 PE=1 SV=2	BCAR1	0.487244	0.474315	0.589832	0.607285	0.877113	1	0.825318	0.973099	0.739725	2.77865	2.87623	0.365624	0.366536	0.558229	0.760901	1.0498	1	0.875627	0.75372	1.3912	3.20752	4.65182	0.457539	0.00489605	0.514976	0.73526	0.950487	1	1.00593	0.935409	0.910197	2.91929	2.88758
aQyDELAR	Y3	P05783	Keratin, type I cytoskeletal 18 OS=Homo sapiens OX=9606 GN=KRT18 PE=1 SV=2	KRT18	0.265155	0.175598	0.751235	0.906546	0.240735	1	0.414393	0.351175	0.709015	0.415342	1.23208	2.45387	0.887407	0.761173	1.65131	16.5874	1	1.04567	0.538668	1.69014	1.10048	3.78121	0.593658	1.11386	1.94748	1.69079	0.888477	1	0.585169	0.532995	1.38031	11.6638	1.60651
aVcSTyLQSR	C3; T5	Q9H2X6; Q86Z02	Homeodomain-interacting protein kinase 2 OS=Homo sapiens OX=9606 GN=HIPK2 PE=1 SV=2; Homeodomain-interacting protein kinase 1 OS=Homo sapiens OX=9606 GN=HIPK1 PE=1 SV=1	HIPK2	0.985539	0.896388	0.761638	1.08149	0.94018	1	0.873135	1.07598	0.902282	0.980724	1.00763	1.17681	0.839613	0.826832	0.88645	0.966656	1	0.930948	0.874741	0.950025	0.81986	0.892954	1.0784	1.14744	1.1275	1.03599	0.873313	1	1.02898	1.04248	0.975762	1.01343	0.966415
aVcSTyLQSR	C3; Y6	Q9H2X6; Q86Z02	Homeodomain-interacting protein kinase 2 OS=Homo sapiens OX=9606 GN=HIPK2 PE=1 SV=2; Homeodomain-interacting protein kinase 1 OS=Homo sapiens OX=9606 GN=HIPK1 PE=1 SV=1	HIPK2	1.09627	0.966331	0.730458	0.825905	0.846285	1	0.888635	0.984556	0.887395	0.900515	0.913901	1.00435	0.913453	0.662631	0.880186	0.882722	1	0.992124	0.753952	0.81861	0.782062	0.859253	0.976449	1.05856	0.929907	1.16146	1.14272	1	1.10887	0.969221	0.903685	1.08542	0.993099
aVLyADYR	Y4	Q96J84	Kin of IRRE-like protein 1 OS=Homo sapiens OX=9606 GN=KIRREL1 PE=1 SV=2	KIRREL1	0.616284	0.591173	0.803393	0.818095	0.853619	1	0.65749	0.771966	0.575341	1.49393	2.85605	0.574677	0.72947	0.640106	0.952723	1.14301	1	0.753686	0.67214	0.978494	1.50634	6.12484	0.484032	0.418003	0.578908	0.763443	0.819674	1	0.767268	0.630548	0.710816	1.3255	2.64094
aYSQEEITQGFEETGDTLYAPYStHFQLQNQPPQk	T24; K35	Q8NFJ5	Retinoic acid-induced protein 3 OS=Homo sapiens OX=9606 GN=GPRC5A PE=1 SV=2	GPRC5A	1.23369	0.111836	1.40447	0.111836	0.111836	1	0.928989	1.17374	1.14238	3.61113	10.9512	0.0804056	0.0804056	0.844727	0.0804056	0.910873	1	0.619673	0.710337	1.24754	2.43769	11.7271	0.061684	0.695921	0.603748	0.7442	0.061684	1	0.532	0.670703	0.863782	2.57215	5.99342
ayTNFDAER	Y2	A6NMY6; P07355	Putative annexin A2-like protein OS=Homo sapiens OX=9606 GN=ANXA2P2 PE=5 SV=2; Annexin A2 OS=Homo sapiens OX=9606 GN=ANXA2 PE=1 SV=2	ANXA2P2	0.329406	0.471724	0.517681	0.699566	0.833179	1	0.343852	0.399188	0.419787	1.23428	2.3461	0.270841	0.166758	0.153541	0.40351	1.50207	1	0.228854	0.215947	0.364349	0.856329	2.09536	0.308457	0.44666	0.395774	0.946666	0.616924	1	0.406061	0.522675	0.507475	4.31491	1.77945
cEFQDAyVLLSEk	C1; Y7; K13	P10809	60 kDa heat shock protein, mitochondrial OS=Homo sapiens OX=9606 GN=HSPD1 PE=1 SV=2	HSPD1	0.755047	0.862025	0.971256	0.832726	0.897148	1	0.981994	0.890733	0.938313	1.16478	1.8947	0.867729	0.632784	0.723034	0.921218	1.50629	1	0.682625	0.759362	0.887918	0.926389	1.32693	0.497839	0.86014	0.630832	0.830923	0.884194	1	0.741219	0.995634	0.863877	2.11213	1.25373
cLEEHYGtSPGQAR	C1; Y6	O75815	Breast cancer anti-estrogen resistance protein 3 OS=Homo sapiens OX=9606 GN=BCAR3 PE=1 SV=1	BCAR3	0.316222	0.206314	0.205214	0.578747	0.470945	1	0.900724	0.881341	0.916397	5.35024	4.66671	0.364423	0.0900432	0.242393	0.346654	0.624275	1	0.703897	0.619745	1.07072	5.31772	6.17898	0.578592	0.67423	0.288398	0.918307	0.880226	1	0.709218	1.62347	1.12623	6.71366	6.71195
cyEMASHLR	C1; Y2	P07737	Profilin-1 OS=Homo sapiens OX=9606 GN=PFN1 PE=1 SV=2	PFN1	0.832195	0.884635	0.869618	0.837745	0.930676	1	0.922677	1.03176	0.909324	1.033	1.32237	0.775265	0.721613	0.801291	0.737552	1.61096	1	1.0144	0.991832	0.819284	1.21447	1.00226	1.12616	1.08789	0.88336	1.16941	1.18258	1	1.25467	1.67837	0.936446	2.33687	1.51423
dGVyDVPLHNPPDAk	Y4; K15	Q14511	Enhancer of filamentation 1 OS=Homo sapiens OX=9606 GN=NEDD9 PE=1 SV=1	NEDD9	0.821809	0.799651	0.927604	0.872807	0.932098	1	1.06968	1.07451	0.810474	1.73491	1.58148	0.58773	0.398071	0.754384	0.5536	0.968886	1	0.585139	0.716778	1.16615	1.28583	2.83205	0.631552	0.553289	0.95991	1.17265	1.18505	1	0.901441	1.04155	0.860284	1.25993	1.51469
dIYETDYyR	Y7	P08069; P06213	Insulin-like growth factor 1 receptor OS=Homo sapiens OX=9606 GN=IGF1R PE=1 SV=1; Insulin receptor OS=Homo sapiens OX=9606 GN=INSR PE=1 SV=4	IGF1R	1.56596	1.64738	1.39005	1.44708	1.20119	1	1.37563	1.43666	1.17283	1.15356	1.25249	1.29283	1.22172	1.37474	1.29395	1.16499	1	1.12937	1.09732	1.48767	1.49492	1.13152	1.2804	0.983486	1.32635	1.21171	1.0134	1	1.12299	0.988628	1.27471	1.1215	0.98268
dIYETDYyR	Y8	P08069; P06213	Insulin-like growth factor 1 receptor OS=Homo sapiens OX=9606 GN=IGF1R PE=1 SV=1; Insulin receptor OS=Homo sapiens OX=9606 GN=INSR PE=1 SV=4	IGF1R	1.25874	1.4528	1.3308	1.27678	1.03998	1	1.08967	1.08332	0.905813	1.1234	1.02802	1.33996	1.10545	1.4501	1.43802	1.22676	1	1.0577	0.919468	1.04896	1.47786	1.04512	1.08058	1.10408	1.28133	1.34231	1.02609	1	1.13409	1.054	1.21208	1.28495	0.938
dkVTIADDySDPFDAk	K2; Y9; K16	Q15464	SH2 domain-containing adapter protein B OS=Homo sapiens OX=9606 GN=SHB PE=1 SV=2	SHB	1.61047	1.26011	1.93887	1.54655	1.31717	1	1.42458	1.64632	1.64762	1.84617	2.71774	0.647493	0.802163	0.88429	0.444858	0.946201	1	1.18149	1.10125	1.39386	0.611907	4.57845	1.18643	0.949766	1.19812	0.962405	1.2587	1	0.881875	1.64618	0.716975	1.35241	2.2143
dLAEDLyDGQVLQk	Y7; K14	Q9NVD7	Alpha-parvin OS=Homo sapiens OX=9606 GN=PARVA PE=1 SV=1	PARVA	0.521851	0.455318	0.510299	0.64461	0.541	1	1.21026	0.882931	0.785733	1.42876	1.81302	0.447416	0.389445	0.401277	0.441998	0.486894	1	0.926174	0.85359	0.862984	0.900581	2.33628	0.248211	0.441856	0.491008	0.452773	0.401169	1	0.764837	1.23327	0.749645	1.5517	1.52072
dLDIIDNYDySHTVk	Y10; K15	O75369	Filamin-B OS=Homo sapiens OX=9606 GN=FLNB PE=1 SV=2	FLNB	0.821509	0.694932	0.892664	0.66884	0.996903	1	0.916538	0.907974	0.8179	1.07924	1.60304	0.64752	0.431174	0.598136	0.881026	1.14105	1	0.829423	0.777414	0.967733	1.36501	2.12244	0.762132	1.02567	0.734004	0.55628	0.520788	1	0.543857	0.614365	0.593285	1.11311	1.12094
dLTDyLMk	Y5; K8	P63267; P60709; P62736; P68133; Q562R1; P68032; P63261	Actin, gamma-enteric smooth muscle OS=Homo sapiens OX=9606 GN=ACTG2 PE=1 SV=1; Actin, cytoplasmic 1 OS=Homo sapiens OX=9606 GN=ACTB PE=1 SV=1; Actin, aortic smooth muscle OS=Homo sapiens OX=9606 GN=ACTA2 PE=1 SV=1; Actin, alpha skeletal muscle OS=Homo sapiens OX=9606 GN=ACTA1 PE=1 SV=1; Beta-actin-like protein 2 OS=Homo sapiens OX=9606 GN=ACTBL2 PE=1 SV=2; Actin, alpha cardiac muscle 1 OS=Homo sa…	ACTG2	0.219278	0.265682	1.09772	0.798517	0.319403	1	0.30347	0.300306	0.480509	0.326683	0.731946	3.29423	0.957367	1.18192	1.90345	29.4571	1	1.21088	1.01206	1.91637	1.29083	4.12634	0.656439	1.03353	1.37348	1.62935	0.713569	1	0.517987	0.634424	1.15995	9.69083	0.987874
dLyANTVLSGGTTMYPGIADR	Y3	P60709; P63261	Actin, cytoplasmic 1 OS=Homo sapiens OX=9606 GN=ACTB PE=1 SV=1; Actin, cytoplasmic 2 OS=Homo sapiens OX=9606 GN=ACTG1 PE=1 SV=1	ACTB	0.813923	0.741901	0.794253	0.726044	0.833526	1	0.815693	1.11194	0.827725	1.00482	1.39027	0.467521	0.502663	1.15114	0.504381	2.06245	1	1.13588	1.55506	1.69514	1.5707	3.73149	0.910893	1.38822	1.07466	1.41978	1.83539	1	2.25272	2.25354	1.75562	3.63108	3.22986
dLyDAGVk	Y3; K8	P07355	Annexin A2 OS=Homo sapiens OX=9606 GN=ANXA2 PE=1 SV=2	ANXA2	0.405676	0.259035	1.01866	0.923836	0.329447	1	0.630884	0.517976	0.765198	0.622832	1.82499	1.35147	0.526348	0.437174	1.15448	8.60732	1	0.767501	0.751685	1.19576	0.479859	3.91517	0.528549	0.691517	1.0247	0.922135	0.613196	1	0.448624	0.482048	0.966484	6.36283	1.833
dPHLLDPTVEyVk	Y11; K13	O75815	Breast cancer anti-estrogen resistance protein 3 OS=Homo sapiens OX=9606 GN=BCAR3 PE=1 SV=1	BCAR3	0.718892	0.591681	0.957268	0.681815	0.7493	1	1.18315	1.32817	1.58161	4.35662	4.77795	0.393189	0.255735	0.435641	0.43624	0.680816	1	0.971821	1.08816	1.83288	4.00485	4.41953	0.526228	0.377811	0.540005	0.675009	0.726566	1	1.01234	1.07147	1.12915	3.98667	2.93158
dQyLMWLTQk	Y3; K10	P27986	Phosphatidylinositol 3-kinase regulatory subunit alpha OS=Homo sapiens OX=9606 GN=PIK3R1 PE=1 SV=2	PIK3R1	1.0929	1.08284	0.865405	0.864342	1.28089	1	0.910534	0.907329	0.904777	1.21697	1.18985	1.07803	1.27845	1.18317	1.09066	1.09349	1	0.497646	1.1526	0.83964	1.30651	0.967868	1.14783	1.36651	0.649583	0.78303	1.12077	1	1.11947	1.16874	0.755954	1.14915	1.41144
dSNPyATLPR	Y5	Q3V6T2	Girdin OS=Homo sapiens OX=9606 GN=CCDC88A PE=1 SV=2	CCDC88A	0.892707	1.02403	0.913764	0.961826	1.04511	1	1.04262	1.11119	1.10306	2.40214	5.41906	1.11245	1.1943	0.817923	1.09029	1.62665	1	1.33566	1.01682	1.48569	2.50507	6.29494	1.10715	1.04693	1.02054	1.20627	0.974629	1	1.03405	1.17679	1.3691	4.02904	5.75229
dTLyEAVR	Y4	P62906	60S ribosomal protein L10a OS=Homo sapiens OX=9606 GN=RPL10A PE=1 SV=2	RPL10A	3.13545	1.77143	3.74565	1.59826	0.960483	1	4.02595	3.20463	2.91674	1.1033	3.31158	1.6813	2.26435	2.03131	0.946528	3.34013	1	2.89453	2.89807	3.20936	1.06601	7.82756	2.85167	1.94551	3.59244	1.06272	2.035	1	1.75596	1.72999	2.26928	3.25381	3.42118
dVDAAyMSk	Y6; K9	P08729	Keratin, type II cytoskeletal 7 OS=Homo sapiens OX=9606 GN=KRT7 PE=1 SV=5	KRT7	0.939103	0.925642	0.695034	0.745899	0.932101	1	0.951412	1.09913	0.881329	1.11117	1.59321	0.63935	0.813946	0.767678	0.534976	1.57524	1	1.10417	1.02554	0.882094	1.22792	0.960212	1.15509	1.07446	0.942157	1.02199	0.975936	1	1.20404	1.38517	0.913134	1.81602	1.68802
dVPDGPLLREEtYDVPPAFAk	T12; K21	P56945	Breast cancer anti-estrogen resistance protein 1 OS=Homo sapiens OX=9606 GN=BCAR1 PE=1 SV=2	BCAR1	1.39703	1.13068	1.65423	0.943418	1.56627	1	1.5455	2.10968	2.13932	4.15595	6.04912	0.356266	0.692895	0.648601	0.645837	1.34087	1	1.29305	0.882786	1.79239	2.10786	13.5048	0.970252	0.316089	1.12097	0.985495	1.26108	1	0.892197	1.17144	1.16232	2.67576	3.81563
dVPDGPLLREEtYDVPPAFAk	Y13; K21	P56945	Breast cancer anti-estrogen resistance protein 1 OS=Homo sapiens OX=9606 GN=BCAR1 PE=1 SV=2	BCAR1	0.939904	0.719036	1.15744	0.621826	1.29053	1	1.60153	1.03422	0.866764	3.50442	4.21204	0.570262	0.659678	0.613095	0.512108	1.20752	1	1.03853	0.8652	1.86324	2.08968	12.0255	0.858507	0.0750194	0.985453	0.713216	1.45194	1	1.50712	1.69539	0.865193	3.13746	4.59943
dVSLGTyGSR	Y7	Q9C0C2	182 kDa tankyrase-1-binding protein OS=Homo sapiens OX=9606 GN=TNKS1BP1 PE=1 SV=4	TNKS1BP1	1.14607	1.02898	0.848403	0.936141	0.729254	1	1.32976	1.4138	1.60345	8.16264	32.2669	0.699341	1.08194	0.799163	0.790968	1.24638	1	1.1466	0.626234	1.96859	5.90177	22.7643	2.39365	0.805265	1.58552	0.715838	1.46877	1	1.25797	1.73668	2.2079	11.9567	41.273
dVTIGGSAPIyVk	Y11; K13	Q8TEW0	Partitioning defective 3 homolog OS=Homo sapiens OX=9606 GN=PARD3 PE=1 SV=2	PARD3	1.41888	1.41682	1.52749	1.62684	1.56829	1	1.05126	1.3288	1.24259	1.52972	2.43603	1.13025	1.16669	1.02166	0.971	1.45216	1	1.05884	0.854911	1.00679	1.00156	2.11202	0.843749	0.593979	0.691924	0.712484	0.720804	1	0.667631	0.733083	0.6777	0.855222	1.75596
dyLIDGSR	Y2	P18206	Vinculin OS=Homo sapiens OX=9606 GN=VCL PE=1 SV=4	VCL	0.564798	0.521641	0.866065	0.983262	0.667349	1	0.848394	0.859769	0.82361	0.977808	1.35164	0.830388	0.829408	0.787217	1.08439	3.64437	1	1.35274	1.3932	1.4351	1.41509	3.03743	0.528278	0.498899	0.864101	0.842637	0.690273	1	0.917154	0.806003	0.753513	2.79537	1.37942
dYNPyNYSDSISPFNk	Y5; K16	O75122	CLIP-associating protein 2 OS=Homo sapiens OX=9606 GN=CLASP2 PE=1 SV=3	CLASP2	0.821054	0.186183	1.06868	0.913365	0.731301	1	0.94521	1.18458	2.01061	9.0298	28.1438	0.683123	0.0716933	0.0716933	0.676915	1.38618	1	0.826423	1.53796	3.11431	9.04826	35.9194	1.85797	1.05997	1.05654	0.841407	1.34406	1	1.14298	1.34299	2.30595	11.9625	38.6301
eAAyHPEVAPDVR	Y4	Q9Y490	Talin-1 OS=Homo sapiens OX=9606 GN=TLN1 PE=1 SV=3	TLN1	0.908614	0.678886	0.911765	0.896572	0.904247	1	1.01992	1.01481	0.914001	1.34956	1.46599	0.964843	0.426232	1.02675	1.13772	1.80945	1	1.79909	1.10088	1.19578	2.13057	3.05704	0.297583	0.466876	0.723832	0.274374	0.712604	1	0.588811	0.673994	0.776145	0.998542	0.918188
eATQPEPIyAESTk	Y9; K14	Q86YV5	Inactive tyrosine-protein kinase PRAG1 OS=Homo sapiens OX=9606 GN=PRAG1 PE=1 SV=4	PRAG1	0.763014	0.63307	0.686124	0.797193	0.798246	1	0.892731	1.04416	0.74828	1.78545	2.39302	0.566387	0.468149	0.560384	0.536958	0.67739	1	0.798041	0.64761	0.988305	1.56537	2.91143	0.553968	0.341945	0.589073	0.581952	0.730202	1	0.694848	0.828873	0.635327	1.5822	1.90378
eEDEHPyELLLTAETk	Y7; K16	Q92625	Ankyrin repeat and SAM domain-containing protein 1A OS=Homo sapiens OX=9606 GN=ANKS1A PE=1 SV=4	ANKS1A	0.474892	0.403601	0.542934	0.428353	0.568807	1	1.14161	1.14159	1.14801	3.14857	5.50607	0.267834	0.281026	0.26724	0.415136	0.490532	1	1.01999	0.849949	1.50009	2.89668	6.71181	0.365487	0.298073	0.383957	0.448078	0.51889	1	1.06452	1.20526	1.21063	3.49313	4.68146
eEDEHPyELLLTAETkk	Y7; K16; K17	Q92625	Ankyrin repeat and SAM domain-containing protein 1A OS=Homo sapiens OX=9606 GN=ANKS1A PE=1 SV=4	ANKS1A	0.575211	0.548844	0.529827	0.488583	0.574906	1	1.4447	1.35543	1.22776	3.33966	5.26923	0.377753	0.498026	0.578299	0.453717	0.647207	1	1.2211	0.886603	1.87119	2.93293	6.61214	0.346746	0.278825	0.375169	0.366839	0.523293	1	0.897185	1.06403	1.02348	2.55167	4.1636
eEPEALyAAVNk	Y7; K12	Q9NZM3	Intersectin-2 OS=Homo sapiens OX=9606 GN=ITSN2 PE=1 SV=3	ITSN2	1.0787	0.889328	1.43614	1.08622	1.1009	1	1.11891	1.12903	1.13289	1.78374	4.07568	0.558653	0.671236	0.804282	0.661481	1.06821	1	1.02729	0.865256	1.3711	1.43749	6.14799	0.787138	0.547785	0.76343	0.610981	1.28648	1	0.954475	0.871565	0.764559	1.44065	2.85276
eGDPAIyAER	Y7	Q9UGI8	Testin OS=Homo sapiens OX=9606 GN=TES PE=1 SV=1	TES	0.573754	0.524314	0.543389	0.908016	0.723557	1	0.765151	0.864622	0.735842	1.26152	1.79581	0.461214	0.548926	0.512575	0.521488	0.85183	1	0.635374	0.444964	0.643664	1.10837	2.07302	0.865749	0.471495	0.941181	1.03211	0.967444	1	1.14658	1.35822	0.834974	1.4197	2.3329
eHALLAyTLGVk	Y7; K12	Q05639; P68104; Q5VTE0	Elongation factor 1-alpha 2 OS=Homo sapiens OX=9606 GN=EEF1A2 PE=1 SV=1; Elongation factor 1-alpha 1 OS=Homo sapiens OX=9606 GN=EEF1A1 PE=1 SV=1; Putative elongation factor 1-alpha-like 3 OS=Homo sapiens OX=9606 GN=EEF1A1P5 PE=5 SV=1	EEF1A2	1.05322	1.0462	1.06554	0.893989	1.01073	1	1.08772	1.16758	1.05857	1.16878	1.41746	1.04668	0.980602	0.975994	0.687061	1.42598	1	0.988202	0.78039	1.08009	1.01037	1.57494	0.696966	0.69966	0.915847	0.566854	0.951898	1	0.816549	0.781813	0.647541	1.37752	1.00743
ekPAQDPLyDVPNASGGQAGGPQRPGR	K2; Y9	Q13671	Ras and Rab interactor 1 OS=Homo sapiens OX=9606 GN=RIN1 PE=1 SV=4	RIN1	0.904544	0.926929	1.26995	1.13618	1.13086	1	1.27566	1.18114	1.25459	1.72929	4.15168	0.685962	0.716125	0.816717	0.613413	1.00156	1	0.920335	0.85971	1.2795	1.42819	5.14735	1.06946	0.644956	1.13573	0.968104	1.25947	1	0.994547	1.03217	0.859934	1.84118	4.76867
eLFDDPsYVNVQNLDk	S7; K16	P29353	SHC-transforming protein 1 OS=Homo sapiens OX=9606 GN=SHC1 PE=1 SV=4	SHC1	0.632939	0.579584	0.792141	0.6605	0.876931	1	1.42013	1.18434	1.15935	3.69358	9.21306	0.0206312	0.364143	0.665441	0.604844	1.01243	1	1.23028	1.019	1.49493	2.94697	14.1994	0.647196	0.368232	0.699554	0.621038	1.05892	1	1.1284	1.10372	1.1301	3.57668	9.29471
eLFDDPsYVNVQNLDk	Y8; K16	P29353	SHC-transforming protein 1 OS=Homo sapiens OX=9606 GN=SHC1 PE=1 SV=4	SHC1	0.80513	0.591278	0.82354	0.764423	0.897457	1	1.28924	1.18719	1.03047	3.82298	9.14505	0.492331	0.510238	0.774187	0.506742	1.07743	1	1.24814	0.851535	1.98517	3.24415	15.387	0.651295	0.360435	0.669224	0.416566	0.83792	1	1.04141	1.22601	0.947781	3.5686	9.34551
eLNyFAk	Y4; K7	P00558	Phosphoglycerate kinase 1 OS=Homo sapiens OX=9606 GN=PGK1 PE=1 SV=3	PGK1	0.928704	0.898588	0.871415	0.890527	0.903644	1	0.862306	0.961623	0.935749	1.02092	1.19284	0.976499	0.847244	0.819129	0.922603	1.61366	1	0.851856	0.919659	0.924412	0.879705	1.14205	0.958021	0.901536	0.958791	0.998173	0.89573	1	0.851314	0.934933	0.994951	1.59808	1.08849
eNPyEDVDLk	Y4; K10	P78524	Suppression of tumorigenicity 5 protein OS=Homo sapiens OX=9606 GN=ST5 PE=1 SV=3	ST5	1.1611	1.0731	1.39779	1.01612	1.24884	1	1.1761	2.10862	1.9612	3.03448	5.63628	1.03464	0.742189	0.931376	0.677951	0.955624	1	0.780268	1.31125	1.25074	1.64189	3.85584	0.707586	0.42477	0.639583	0.762781	0.96025	1	0.833213	0.683315	0.784811	2.05293	3.07682
eQEEAIAQFPyVEFTGR	Y11	Q9BVX2	Transmembrane protein 106C OS=Homo sapiens OX=9606 GN=TMEM106C PE=1 SV=1	TMEM106C	0.29826	0.292417	0.708814	0.78126	0.0260503	1	1.05069	1.24703	1.4367	8.41456	23.4053	0.766032	0.497111	0.0382754	0.788414	1.01547	1	0.882256	0.959515	1.4619	7.42639	21.6869	0.0892721	0.0892721	0.0892721	0.0892721	0.0892721	1	0.717293	1.09204	1.28883	8.03883	18.5525
eRDyAEIQDFHR	Y4	Q8TEW0	Partitioning defective 3 homolog OS=Homo sapiens OX=9606 GN=PARD3 PE=1 SV=2	PARD3	2.41277	1.03209	2.74291	1.7836	1.71755	1	2.60716	2.06926	1.68711	1.64789	5.07173	2.07631	1.35077	1.77442	0.959451	2.76519	1	1.84115	1.56915	2.15376	0.925978	10.3072	2.03977	0.878058	2.13102	0.998971	2.93233	1	1.30926	1.3583	1.2618	1.53911	4.63975
eSMcSTPAFPVSPEtPYVk	C4; Y17; K19	Q68CZ2	Tensin-3 OS=Homo sapiens OX=9606 GN=TNS3 PE=1 SV=2	TNS3	0.69763	0.52197	0.473577	0.547114	0.54448	1	1.40718	1.77584	1.94492	8.00444	12.6355	0.316558	0.438975	0.391764	0.17113	0.498564	1	1.08022	1.03248	1.66596	6.39559	6.55731	0.80102	0.695221	0.52592	0.713241	0.813279	1	2.34851	2.37815	2.59964	9.40512	16.239
eTkDTDIVDEAIyYFk	K3; Y13; K16	O15145	Actin-related protein 2/3 complex subunit 3 OS=Homo sapiens OX=9606 GN=ARPC3 PE=1 SV=3	ARPC3	1.39638	0.955885	1.12267	0.904411	1.07403	1	1.67829	1.12825	1.49281	1.75883	2.49372	0.0876433	0.0876433	0.787645	0.0876433	0.943505	1	0.755388	1.15422	0.983476	0.712319	3.51074	1.12669	0.689336	0.760771	0.776771	0.906701	1	0.778199	0.913672	0.78558	1.41185	2.207
eVcDGWSLPNPEyYTLR	C3; Y13	Q96JJ3	Engulfment and cell motility protein 2 OS=Homo sapiens OX=9606 GN=ELMO2 PE=1 SV=2	ELMO2	1.07159	1.41821	1.14347	1.11376	1.3593	1	1.15459	1.32661	1.38597	2.88992	6.53135	0.797548	0.948159	0.945275	0.894953	1.01835	1	1.0598	1.06554	1.15423	1.15021	2.01802	0.981657	1.23886	0.99957	0.830651	1.04728	1	1.19252	1.42978	0.86909	1.73296	3.11882
eVPIyANR	Y5	Q13443	Disintegrin and metalloproteinase domain-containing protein 9 OS=Homo sapiens OX=9606 GN=ADAM9 PE=1 SV=1	ADAM9	0.778273	0.726252	0.810549	1.01047	0.774281	1	0.865534	0.920482	0.929317	1.86744	3.98356	0.63316	0.579512	0.776487	0.814112	0.87817	1	0.933898	0.783655	1.06796	1.77991	4.72863	0.670286	0.444016	0.747984	0.692232	0.89342	1	0.763888	0.871116	0.911712	1.84152	3.26932
eVyFAER	Y3	P50238	Cysteine-rich protein 1 OS=Homo sapiens OX=9606 GN=CRIP1 PE=1 SV=3	CRIP1	0.970275	0.941694	1.09019	0.968862	0.705397	1	1.14522	1.12672	1.24487	1.11054	2.31294	0.817456	0.777085	0.703531	0.74691	0.822521	1	0.978698	0.922909	1.15474	1.06396	2.15852	0.890587	0.966261	0.847226	0.917411	0.697408	1	1.00489	1.22479	1.26495	1.56905	2.24459
eYDQLyEEYTR	Y6	O00459	Phosphatidylinositol 3-kinase regulatory subunit beta OS=Homo sapiens OX=9606 GN=PIK3R2 PE=1 SV=2	PIK3R2	0.987537	0.827592	1.33459	1.1061	1.32566	1	1.07499	0.80315	0.619455	1.44762	1.91251	0.514358	0.67441	0.87008	0.500966	1.10246	1	0.801188	0.579846	0.811152	0.700444	2.95245	0.93277	0.574074	1.31311	0.936778	1.82321	1	1.1241	1.34322	0.642567	1.30018	1.98146
fANyIDk	Y4; K7	P08670	Vimentin OS=Homo sapiens OX=9606 GN=VIM PE=1 SV=4	VIM	0.758715	0.766886	1.00648	0.848583	0.784863	1	0.748287	0.844296	0.920102	0.936597	1.31181	0.965261	0.67144	0.490344	0.9765	2.95992	1	0.916169	1.01135	1.16572	1.05157	1.87466	0.790144	0.731197	0.793911	0.953347	0.826541	1	0.754564	0.828552	0.874653	2.79063	1.02791
fIHQQPQSSSPVyGSSAk	S9; K18	P49023	Paxillin OS=Homo sapiens OX=9606 GN=PXN PE=1 SV=3	PXN	0.238665	0.177561	0.62717	0.753626	0.630286	1	0.722742	0.507587	0.736645	3.51065	3.99735	0.43101	0.00153736	0.323898	0.742906	0.606997	1	0.69321	0.513925	1.28427	3.47651	6.28911	0.00332501	0.352539	0.495311	0.7154	0.86062	1	0.769635	0.963212	0.949224	3.61451	5.1902
fIHQQPQSSSPVyGSSAk	Y13; K18	P49023	Paxillin OS=Homo sapiens OX=9606 GN=PXN PE=1 SV=3	PXN	0.302409	0.314347	0.530183	0.677283	0.600049	1	0.746414	0.745769	0.687779	3.18122	3.65663	0.353099	0.319347	0.607454	0.529584	0.637647	1	0.732743	0.697918	1.34102	3.53985	7.22529	0.355752	0.340391	0.519069	0.634522	0.636025	1	0.656571	0.723054	0.775062	3.21293	3.67164
fQDGDLTLyQSNTILR	Y9	P09211	Glutathione S-transferase P OS=Homo sapiens OX=9606 GN=GSTP1 PE=1 SV=2	GSTP1	0.721394	0.537534	0.781922	0.688661	0.795142	1	0.741008	0.789226	0.874122	0.781097	1.24668	0.476573	0.920724	0.46987	1.07271	1.37531	1	1.11245	1.2981	1.27268	0.96911	2.35908	0.815491	0.0373098	0.497198	0.461003	0.83024	1	0.428837	0.588585	0.39712	1.24668	0.711111
fSISPDEDSSsYSSNSDFNYSYPTk	S16; K25	Q96QD8	Sodium-coupled neutral amino acid transporter 2 OS=Homo sapiens OX=9606 GN=SLC38A2 PE=1 SV=2	SLC38A2	0.886102	1.74732	1.59867	1.26731	1.05205	1	1.17314	1.3718	1.10628	0.956932	1.48609	0.792182	0.612103	0.886398	0.748339	1.11247	1	0.959229	0.940818	1.05529	0.879244	2.21767	0.981566	0.427114	0.699597	0.894179	1.00418	1	0.775669	0.599817	0.835496	0.718908	0.873635
fSISPDEDSSsYSSNSDFNYSYPTk	Y20; K25	Q96QD8	Sodium-coupled neutral amino acid transporter 2 OS=Homo sapiens OX=9606 GN=SLC38A2 PE=1 SV=2	SLC38A2	0.864455	0.826798	1.07442	1.07116	1.21371	1	0.853849	1.01154	0.823626	1.11945	1.42578	0.809971	0.828086	1.27558	1.1486	1.55406	1	0.919841	0.864035	1.05827	0.966957	1.95645	0.925954	0.658398	1.01463	1.05509	1.08221	1	0.840605	0.820067	1.02042	0.995876	1.33455
gDNIyEWR	Y5	Q96LR5; P51965; Q969T4	Ubiquitin-conjugating enzyme E2 E2 OS=Homo sapiens OX=9606 GN=UBE2E2 PE=1 SV=1; Ubiquitin-conjugating enzyme E2 E1 OS=Homo sapiens OX=9606 GN=UBE2E1 PE=1 SV=1; Ubiquitin-conjugating enzyme E2 E3 OS=Homo sapiens OX=9606 GN=UBE2E3 PE=1 SV=1	UBE2E2	1.11911	0.990737	1.08529	0.950131	1.12415	1	1.14222	0.992648	1.13077	1.01061	1.53459	0.83741	0.963849	0.864208	0.750824	1.0361	1	0.965148	0.950893	1.21408	1.02125	1.7893	0.791407	0.947154	1.08898	0.877288	1.1302	1	0.996798	1.12167	1.10447	1.34429	2.08109
gDyPLEAVR	Y3	P14618	Pyruvate kinase PKM OS=Homo sapiens OX=9606 GN=PKM PE=1 SV=4	PKM	0.534576	0.580764	0.982273	0.873971	0.655076	1	0.767914	0.791058	0.883496	0.855288	1.21699	1.1103	0.599306	0.586411	1.19625	4.82387	1	0.790476	0.894222	1.13848	1.10416	1.808	0.589682	0.804198	1.06726	1.13467	0.690561	1	0.738701	0.817873	1.21411	5.12226	1.00525
gEPNVSyIcSR	S6; C9	P49840; P49841	Glycogen synthase kinase-3 alpha OS=Homo sapiens OX=9606 GN=GSK3A PE=1 SV=2; Glycogen synthase kinase-3 beta OS=Homo sapiens OX=9606 GN=GSK3B PE=1 SV=2	GSK3A	1.11691	1.13492	1.16981	0.940628	1.05711	1	1.11395	1.21655	1.06397	1.08609	1.16702	0.965013	1.01528	1.02874	1.02498	0.988989	1	1.06289	1.0591	1.02472	0.992451	1.2626	1.05061	0.989909	1.03205	0.935059	1.11814	1	1.12092	1.00796	0.981289	1.14766	1.21557
gEPNVSyIcSR	Y7; C9	P49840; P49841	Glycogen synthase kinase-3 alpha OS=Homo sapiens OX=9606 GN=GSK3A PE=1 SV=2; Glycogen synthase kinase-3 beta OS=Homo sapiens OX=9606 GN=GSK3B PE=1 SV=2	GSK3A	1.1521	1.05896	1.10353	1.02346	1.04609	1	1.16489	1.10892	1.17292	1.14317	1.11251	0.965981	1.08668	1.00162	0.861727	0.978378	1	1.03796	1.01355	1.0696	0.904747	1.19989	1.22622	1.08582	1.18161	1.13967	1.10494	1	1.18651	1.23178	1.0487	1.14472	1.30808
gESAGyMEPYEAQR	Y6	Q15464	SH2 domain-containing adapter protein B OS=Homo sapiens OX=9606 GN=SHB PE=1 SV=2	SHB	1.70028	1.39998	1.08649	1.35957	1.29093	1	1.17741	1.60355	1.43569	1.38749	2.91118	0.735857	1.0604	0.760388	0.447168	1.1211	1	0.887403	1.19071	1.01978	0.870434	1.56662	1.72912	1.25004	1.3402	1.20792	1.64429	1	1.05005	1.88106	0.744711	1.29536	2.50458
gFFIcDQPYEPVSPySck	C5; Y15; C17; K18	P07814	Bifunctional glutamate/proline--tRNA ligase OS=Homo sapiens OX=9606 GN=EPRS PE=1 SV=5	EPRS	0.657864	0.288484	0.449508	0.411005	0.678499	1	0.996597	1.1533	2.2384	4.50349	36.9528	0.0167778	0.17192	0.152257	0.358814	0.2501	1	0.734107	0.890556	2.01741	3.99146	39.0048	0.0706703	1.28082	0.0706703	1.19837	0.0706703	1	1.88571	1.59892	3.75837	7.26656	70.7077
gIVVyTGDR	Y5	P05023	Sodium/potassium-transporting ATPase subunit alpha-1 OS=Homo sapiens OX=9606 GN=ATP1A1 PE=1 SV=1	ATP1A1	2.51015	1.44457	4.21622	1.48875	1.1884	1	3.1245	3.11322	2.5104	1.15755	1.30585	3.17917	2.10252	6.30896	1.35104	1.56087	1	6.28925	6.62843	5.17712	0.668634	2.96412	5.82116	1.4963	3.58429	1.34286	1.10204	1	1.57616	2.33056	2.51762	1.23872	1.22712
gLcTSPAEHQYFMTEyVATR	C3; Y16	Q13164	Mitogen-activated protein kinase 7 OS=Homo sapiens OX=9606 GN=MAPK7 PE=1 SV=2	MAPK7	1.1222	0.895553	1.52299	1.30475	1.19936	1	1.4128	1.50898	1.46515	1.40944	1.22984	0.898997	1.13615	0.87017	1.01554	1.13506	1	1.32389	1.09619	1.2284	1.25327	1.73897	0.783495	0.716059	0.824836	0.889608	1.12228	1	1.04403	1.05327	0.910497	1.14547	1.20618
gLLPSQYGQEVyDTPPMAVk	Y12; K20	P56945	Breast cancer anti-estrogen resistance protein 1 OS=Homo sapiens OX=9606 GN=BCAR1 PE=1 SV=2	BCAR1	1.49482	1.20999	1.23299	0.936073	1.37413	1	1.81632	2.09288	1.66932	4.43085	5.86973	0.560914	0.540077	0.671477	0.281394	0.688645	1	0.864626	0.578446	0.844065	1.42032	3.01857	0.673086	0.514366	0.625607	0.747406	1.47542	1	1.5109	1.80842	1.12353	2.21234	4.43084
gMSVyGLGR	Y5	Q15417	Calponin-3 OS=Homo sapiens OX=9606 GN=CNN3 PE=1 SV=1	CNN3	1.07722	1.02416	1.15661	0.789385	1.14353	1	1.61587	1.34721	1.1645	3.42682	9.00323	0.728456	0.853052	1.01064	0.531177	0.959121	1	0.990921	0.9292	1.26589	2.87777	7.66956	0.885694	0.540918	0.783634	0.878692	0.986747	1	1.13316	1.66772	0.661889	3.42009	7.33239
gPNGRDPLLEVyDVPPSVEk	Y12; K20	P56945	Breast cancer anti-estrogen resistance protein 1 OS=Homo sapiens OX=9606 GN=BCAR1 PE=1 SV=2	BCAR1	0.802451	0.693517	0.870215	0.708409	1.04616	1	1.2984	1.2686	1.23509	3.0385	3.6307	0.408936	0.511273	0.629785	0.481039	0.945072	1	0.967139	0.763691	1.399	1.95957	5.18013	0.767838	0.39697	0.938938	0.732946	1.11275	1	1.00446	1.19991	1.24945	2.99452	3.28965
gRSDyDGIGSR	Y5	O00571	ATP-dependent RNA helicase DDX3X OS=Homo sapiens OX=9606 GN=DDX3X PE=1 SV=3	DDX3X	0.842806	0.716797	0.765794	0.959004	0.676887	1	1.11369	1.46923	1.24419	4.61571	9.2329	0.606974	0.845821	0.493727	0.549962	0.954734	1	0.744546	0.673216	1.32963	3.08104	5.91507	0.940817	0.705213	0.945519	1.27099	0.932208	1	1.07572	1.15846	1.29655	4.0051	9.48428
gsPHYFSPFRPY	S2	Q13242	Serine/arginine-rich splicing factor 9 OS=Homo sapiens OX=9606 GN=SRSF9 PE=1 SV=1	SRSF9	0.763107	0.728354	0.938889	0.842194	0.86969	1	0.881931	0.857339	0.995971	0.946178	0.909393	1.11512	1.05064	0.991069	1.15102	1.24305	1	0.994013	0.881314	1.00788	1.03131	1.23982	0.897702	0.911383	1.00651	0.950176	0.895397	1	0.856225	0.867125	0.897682	1.04718	0.898799
gSTAENAEyLR	Y9	P00533	Epidermal growth factor receptor OS=Homo sapiens OX=9606 GN=EGFR PE=1 SV=2	EGFR	1.58666	1.15324	1.14252	1.08815	1.38074	1	1.03885	1.16971	0.843665	0.985403	3.22884	1.50752	1.67817	1.1353	1.24841	3.66389	1	1.16344	0.954937	1.47843	1.3089	4.66373	1.9226	0.932442	1.22429	1.93234	2.68678	1	1.03306	1.358	0.775394	1.31345	3.82627
gVNTGAVGSYIyDRDPEGk	Y12; K19	P52943	Cysteine-rich protein 2 OS=Homo sapiens OX=9606 GN=CRIP2 PE=1 SV=1	CRIP2	1.40556	1.35537	1.42565	1.61387	0.766567	1	1.35634	0.981842	1.51885	4.05835	14.3898	0.671634	1.04019	0.997634	0.845371	1.43314	1	0.88973	1.20535	1.92249	3.37554	16.3604	0.73694	0.380273	0.968163	0.894014	1.1455	1	0.67619	1.21031	1.33816	3.26677	13.8187
gVyAIPPSAcR	Y3; C10	Q14511	Enhancer of filamentation 1 OS=Homo sapiens OX=9606 GN=NEDD9 PE=1 SV=1	NEDD9	0.832243	0.952252	0.851203	0.744378	0.854755	1	1.00059	0.945996	0.859224	1.87977	2.06638	0.470937	0.467787	0.593234	0.93544	0.820854	1	0.593567	0.925356	1.07703	1.48041	1.56939	0.702208	0.642583	0.916276	0.852695	0.836987	1	0.981764	0.941984	0.915046	1.78606	2.09909
gYISPyFINTSk	Y6; K12	P10809	60 kDa heat shock protein, mitochondrial OS=Homo sapiens OX=9606 GN=HSPD1 PE=1 SV=2	HSPD1	0.939881	0.866367	1.04971	0.873735	0.825813	1	0.894238	1.26953	0.577019	1.57926	1.96574	1.36881	0.704367	1.54112	0.654841	3.34655	1	0.782513	0.937977	0.964046	1.28446	1.90072	0.852326	0.884241	0.671134	1.11449	0.964279	1	0.849693	1.12537	1.23131	3.53915	1.94882
gySFTTTAER	Y2	P60709; P63261	Actin, cytoplasmic 1 OS=Homo sapiens OX=9606 GN=ACTB PE=1 SV=1; Actin, cytoplasmic 2 OS=Homo sapiens OX=9606 GN=ACTG1 PE=1 SV=1	ACTB	0.291405	0.326426	0.877792	0.921723	0.336937	1	0.410045	0.433403	0.647825	0.552347	2.12484	2.172	0.766498	0.655135	1.6357	11.2508	1	0.701056	0.836052	1.33672	1.01463	5.05409	0.67574	0.998767	1.19235	1.37433	0.56529	1	0.461847	0.595841	1.10642	7.60577	2.51992
hELQANcyEEVkDR	C7; Y8; K12	P23528	Cofilin-1 OS=Homo sapiens OX=9606 GN=CFL1 PE=1 SV=3	CFL1	0.711372	0.530592	0.96929	0.815554	0.986016	1	0.731036	0.561174	0.567674	1.20133	2.89166	0.467817	0.273405	0.534976	0.763234	1.51181	1	0.466761	0.482909	0.890062	1.05002	5.02663	0.5314	0.238225	0.899351	1.10464	1.35228	1	0.703427	0.738353	0.566236	2.23229	3.4951
hGETFTFRDPHLLDPTVEyVk	Y19; K21	O75815	Breast cancer anti-estrogen resistance protein 3 OS=Homo sapiens OX=9606 GN=BCAR3 PE=1 SV=1	BCAR3	0.760959	0.965812	0.0439726	1.0261	0.609961	1	0.563352	1.47329	1.62893	4.0075	3.77576	0.628929	0.531758	0.376855	0.461819	0.756527	1	1.24088	0.923307	1.54894	3.58158	3.76303	0.576146	0.512443	0.699159	0.64667	0.787204	1	1.19857	1.36991	1.42748	4.16058	3.99873
hGSGADSDyENTQSGDPLLGLEGk	Y9; K24	Q9Y2X7	ARF GTPase-activating protein GIT1 OS=Homo sapiens OX=9606 GN=GIT1 PE=1 SV=2	GIT1	0.509237	0.495508	0.929828	0.921971	0.743805	1	0.993956	0.783769	0.949735	1.54976	1.7702	0.791965	0.470949	0.578031	1.07185	1.26929	1	1.06214	0.65643	1.31298	1.6027	3.37932	0.403023	0.535685	0.652845	0.945323	1.09114	1	0.683014	1.09874	0.763677	1.97758	2.22961
hLLAPGPQDIyDVPPVR	Y11	P56945	Breast cancer anti-estrogen resistance protein 1 OS=Homo sapiens OX=9606 GN=BCAR1 PE=1 SV=2	BCAR1	0.866456	0.692064	0.850357	0.876453	0.978054	1	1.17569	1.14196	1.08834	2.37111	3.40242	0.436924	0.713409	0.609348	0.532085	1.07969	1	0.716802	0.705659	1.33696	1.84799	8.16748	0.644444	0.372793	0.600272	0.787062	1.03718	1	0.928715	0.854596	0.801534	1.99509	3.05481
hPDIyAVPIk	Y5; K10	Q9UDY2	Tight junction protein ZO-2 OS=Homo sapiens OX=9606 GN=TJP2 PE=1 SV=2	TJP2	0.719967	0.649885	0.882095	0.684532	1.11011	1	0.650158	0.703775	0.610828	1.03045	3.33717	0.77461	0.769031	0.695135	0.837206	1.19766	1	0.815514	0.855244	1.08134	1.18509	5.11867	0.84087	0.0463765	0.619396	0.597689	1.20271	1	0.741417	0.84505	0.761058	1.37821	3.82088
hTDDEMTGyVATR	Y9	Q16539	Mitogen-activated protein kinase 14 OS=Homo sapiens OX=9606 GN=MAPK14 PE=1 SV=3	MAPK14	1.12495	1.18375	0.799852	1.83209	1.13694	1	1.01867	1.40837	1.05771	1.76975	1.57807	0.641012	1.0041	0.955695	1.19322	0.950888	1	1.02496	1.07559	0.974903	1.75429	0.935531	1.2009	1.01169	0.990861	1.71667	1.22851	1	1.30557	1.27425	0.876644	1.37176	1.67938
hVAYGGySTPEDR	Y4	Q9HBL0	Tensin-1 OS=Homo sapiens OX=9606 GN=TNS1 PE=1 SV=2	TNS1	0.567281	0.362614	0.193916	0.603162	0.62004	1	0.778522	1.27806	1.00529	4.69259	4.84626	0.0485811	0.0485811	0.664097	0.606149	0.675235	1	0.850399	0.710882	1.63537	4.25261	6.71322	0.05369	0.05369	0.05369	0.05369	0.05369	1	0.941148	0.80275	1.39772	3.06504	4.06756
hVAYGGySTPEDR	Y7	Q9HBL0	Tensin-1 OS=Homo sapiens OX=9606 GN=TNS1 PE=1 SV=2	TNS1	0.455128	0.39758	0.751494	0.879002	0.909401	1	1.33313	1.57222	1.22289	4.34178	4.01652	0.41333	0.0349527	0.415264	0.267366	0.709304	1	1.08302	1.47445	1.2373	3.32804	4.01635	0.0329649	0.0329649	0.332445	0.438481	0.718772	1	0.869997	1.36012	1.82431	2.67246	3.13046
hYEDGYPGGSDNyGSLSR	Y13	O60716	Catenin delta-1 OS=Homo sapiens OX=9606 GN=CTNND1 PE=1 SV=1	CTNND1	0.593883	0.416312	0.662185	0.832851	1.44957	1	0.691258	0.648344	0.794671	1.97083	10.1068	0.0496915	0.67572	0.767024	1.32779	3.18225	1	0.646264	0.755433	1.48779	2.50598	21.6933	0.601395	0.267243	0.447738	0.847363	1.50069	1	0.63537	0.623407	0.871934	2.94911	11.8283
hYEDGYPGGSDNyGSLSR	Y2	O60716	Catenin delta-1 OS=Homo sapiens OX=9606 GN=CTNND1 PE=1 SV=1	CTNND1	0.873972	0.613306	0.550989	0.880124	1.04469	1	0.974786	1.23313	1.81415	5.29968	18.4163	0.402729	0.41222	0.269035	0.418204	1.28035	1	1.29809	0.815837	2.13986	4.94513	19.5296	1.16123	0.64875	0.991312	1.02903	1.95466	1	1.22042	1.18634	2.43723	5.17731	17.8767
iADPEHDHTGFLTEyVATR	Y15	P27361	Mitogen-activated protein kinase 3 OS=Homo sapiens OX=9606 GN=MAPK3 PE=1 SV=4	MAPK3	0.693532	0.669669	0.900196	1.32806	0.761925	1	1.02585	0.950108	0.976348	2.07881	1.04457	0.516683	0.544687	0.696131	0.929555	0.76596	1	0.828842	0.739979	1.05701	1.65342	1.3495	0.645309	0.555875	0.851658	1.21504	0.838582	1	1.1086	1.17964	0.799211	1.69659	1.16562
iDFYFDENPyFENk	Y10; K14	Q01105; P0DME0	Protein SET OS=Homo sapiens OX=9606 GN=SET PE=1 SV=3; Protein SETSIP OS=Homo sapiens OX=9606 GN=SETSIP PE=1 SV=1	SET	2.11379	1.64226	2.52731	1.34817	1.23129	1	2.20064	2.25604	2.28255	1.83601	3.62222	1.17424	1.21566	1.53271	0.747987	2.3696	1	2.14694	1.91331	2.37348	1.02891	4.67681	1.30286	1.0745	1.71527	1.0941	1.21849	1	1.09299	1.34537	1.43096	2.60961	2.95538
iGEGTyGTVFk	Y6; K11	Q00535	Cyclin-dependent-like kinase 5 OS=Homo sapiens OX=9606 GN=CDK5 PE=1 SV=3	CDK5	1.13602	0.548246	1.06084	0.936713	1.07977	1	1.23245	0.877075	0.689156	1.33786	1.59346	0.554396	0.516594	0.729752	0.726284	0.523183	1	0.638638	0.648348	0.909168	0.868553	1.95532	0.573312	0.51364	0.619117	0.795038	0.770739	1	0.994303	0.742768	0.487928	1.1173	1.34667
iGEGTyGVVYk	T5; K11	P24941; P06493; Q00526	Cyclin-dependent kinase 2 OS=Homo sapiens OX=9606 GN=CDK2 PE=1 SV=2; Cyclin-dependent kinase 1 OS=Homo sapiens OX=9606 GN=CDK1 PE=1 SV=3; Cyclin-dependent kinase 3 OS=Homo sapiens OX=9606 GN=CDK3 PE=1 SV=1	CDK2	1.00672	0.946519	1.139	1.09911	1.09038	1	0.934042	0.833729	0.808259	1.08929	1.22478	0.565091	0.713997	0.727994	0.812559	0.800099	1	0.74236	0.579646	0.888011	0.839242	1.64619	0.925856	0.667751	0.929726	0.981819	1.09986	1	0.855239	0.87685	0.820519	1.01394	1.33669
iGEGTyGVVYk	Y6; K11	P24941; P06493; Q00526	Cyclin-dependent kinase 2 OS=Homo sapiens OX=9606 GN=CDK2 PE=1 SV=2; Cyclin-dependent kinase 1 OS=Homo sapiens OX=9606 GN=CDK1 PE=1 SV=3; Cyclin-dependent kinase 3 OS=Homo sapiens OX=9606 GN=CDK3 PE=1 SV=1	CDK2	1.06768	0.970997	1.21484	1.21066	1.16174	1	0.986724	0.906669	0.769746	1.10471	1.26516	0.704985	0.719522	0.928161	0.890258	0.966371	1	0.800101	0.640651	0.933436	0.833365	1.76049	0.913474	0.656632	1.00617	0.938216	1.14821	1	0.884087	0.87518	0.664176	1.01748	1.21028
iIQLLDDyPk	Y8; K10	P05388; Q8NHW5	60S acidic ribosomal protein P0 OS=Homo sapiens OX=9606 GN=RPLP0 PE=1 SV=1; 60S acidic ribosomal protein P0-like OS=Homo sapiens OX=9606 GN=RPLP0P6 PE=5 SV=1	RPLP0	0.864037	0.916024	1.08926	0.911551	0.985208	1	1.06612	1.07222	1.04194	1.12894	1.1135	0.73768	0.612379	0.609812	0.952177	0.969557	1	0.750268	0.851638	1.12244	0.762154	1.10703	0.636509	0.803305	0.665919	0.93703	0.801564	1	0.879874	1.05327	0.890738	1.19047	1.1121
iQEIIEQLDVTTSEyEkEk	Y15; K17; K19	P10809	60 kDa heat shock protein, mitochondrial OS=Homo sapiens OX=9606 GN=HSPD1 PE=1 SV=2	HSPD1	1.00548	1.04359	1.0783	1.03408	1.15445	1	1.12673	1.06047	1.00834	1.07814	1.32035	0.874844	0.843125	0.867417	0.699347	1.31567	1	0.9479	1.01955	1.17384	0.98876	1.37	0.710286	0.914546	0.722454	0.781916	0.8534	1	0.810758	0.878088	0.916637	1.32807	1.06281
iTNDyIF	Y5	Q8NC54	Keratinocyte-associated transmembrane protein 2 OS=Homo sapiens OX=9606 GN=KCT2 PE=1 SV=2	KCT2	0.61607	0.851115	0.94814	1.22808	0.974701	1	1.06677	1.2113	0.852136	1.22294	4.15667	0.0713739	0.0713739	0.62289	0.0713739	0.510958	1	0.530828	1.2483	0.932561	1.72783	5.96513	0.367277	0.527376	0.9507	0.906118	0.851623	1	0.864624	1.19744	0.754544	1.72013	3.40405
iyEYVESR	Y2	Q8WWY3	U4/U6 small nuclear ribonucleoprotein Prp31 OS=Homo sapiens OX=9606 GN=PRPF31 PE=1 SV=2	PRPF31	1.13146	0.900711	0.714732	1.09132	1.12922	1	0.9543	0.935561	0.956323	1.30216	1.56757	1.01337	0.980794	1.10918	1.24822	1.13231	1	1.20331	1.16317	1.05206	1.2622	2.22003	0.778159	0.919058	0.858442	1.1644	1.21337	1	1.16285	1.13747	0.926354	1.42449	1.31101
iyGISFPDPk	Y2; K10	P26639	Threonine--tRNA ligase 1, cytoplasmic OS=Homo sapiens OX=9606 GN=TARS1 PE=1 SV=3	TARS1	1.09721	0.811925	1.17107	0.791555	0.639973	1	1.27448	1.32551	1.34234	1.23607	1.43091	0.916641	1.00346	0.980498	0.722424	0.983183	1	1.35532	1.18807	1.32887	1.04303	2.21154	1.07543	0.922733	0.890528	0.632449	0.932716	1	1.16652	1.36172	1.43595	1.3975	1.80474
iYNGDyYR	Y6	P30530	Tyrosine-protein kinase receptor UFO OS=Homo sapiens OX=9606 GN=AXL PE=1 SV=4	AXL	1.66254	1.20006	1.10886	1.44364	1.18854	1	1.16342	1.44801	1.23692	1.17682	1.86175	1.08178	1.09779	1.15252	1.16024	1.32171	1	1.07312	1.13051	1.47081	0.993712	1.56236	1.31921	1.12702	0.955247	1.38757	1.23	1	1.0324	1.10535	1.09816	1.0397	1.49437
iYQyIQSR	Y4	Q9Y463; Q13627	Dual specificity tyrosine-phosphorylation-regulated kinase 1B OS=Homo sapiens OX=9606 GN=DYRK1B PE=1 SV=1; Dual specificity tyrosine-phosphorylation-regulated kinase 1A OS=Homo sapiens OX=9606 GN=DYRK1A PE=1 SV=2	DYRK1B	1.03407	0.946869	0.810326	0.970654	0.94999	1	0.923184	1.02538	1.04549	1.00244	1.02517	0.941242	1.03308	0.741486	0.881248	1.0151	1	0.849671	1.03564	1.02211	1.01637	1.00719	0.953474	0.907728	0.815106	0.999943	0.876251	1	0.884726	0.88207	0.914138	0.963979	0.912512
kLSLGQyDNDAGGQLPFSk	K1; Y7; K19	Q68CZ2	Tensin-3 OS=Homo sapiens OX=9606 GN=TNS3 PE=1 SV=2	TNS3	0.748259	0.724399	0.738054	0.692934	0.776772	1	1.06859	1.08331	1.20798	2.1929	4.30666	0.727808	0.823837	0.81286	0.788469	0.837044	1	1.10233	1.08945	1.37825	2.26366	5.39171	0.680397	0.700418	0.72653	0.702458	0.720836	1	0.953968	1.00711	1.14142	2.00735	4.20628
kPTyDPVSEDQDPLSSDFk	K1; Y4; K19	Q07912	Activated CDC42 kinase 1 OS=Homo sapiens OX=9606 GN=TNK2 PE=1 SV=3	TNK2	0.842925	0.892285	1.0073	1.0537	1.03258	1	0.827353	1.00418	0.781779	0.910014	1.3223	0.402373	0.589772	0.5201	0.697996	0.52574	1	0.599092	0.704383	0.973248	0.87374	1.17204	0.768231	0.657356	0.802971	0.977582	0.801403	1	0.859505	0.847275	0.829114	1.24893	1.15117
kPTyDPVSEDQDPLSSDFkR	K1; Y4; K19	Q07912	Activated CDC42 kinase 1 OS=Homo sapiens OX=9606 GN=TNK2 PE=1 SV=3	TNK2	0.821302	0.893495	0.941865	1.0018	0.992136	1	0.851688	0.880647	0.788254	0.913306	1.13421	0.890378	0.846332	0.87632	1.00579	0.815421	1	0.879692	0.722964	1.06778	0.879539	1.17239	0.817245	0.70244	0.836729	0.945082	0.837253	1	0.811153	0.816933	0.834104	0.929344	1.10654
kVYNDGYDDDNyDYIVk	K1; Y12; K17	Q13627	Dual specificity tyrosine-phosphorylation-regulated kinase 1A OS=Homo sapiens OX=9606 GN=DYRK1A PE=1 SV=2	DYRK1A	1.00911	1.21687	1.0632	0.863417	0.924381	1	1.31499	1.22734	1.05919	0.964442	1.30869	0.90785	0.877245	0.943443	0.807769	0.835912	1	1.16176	1.06328	0.933183	0.942591	1.57225	1.13598	0.958912	0.86633	0.891963	0.99514	1	1.11516	1.2415	1.14736	1.12428	1.39019
lASyLDk	Y4; K7	P02533; P08727; P13645; P19012; Q99456; Q04695; P35527; P08779	Keratin, type I cytoskeletal 14 OS=Homo sapiens OX=9606 GN=KRT14 PE=1 SV=4; Keratin, type I cytoskeletal 19 OS=Homo sapiens OX=9606 GN=KRT19 PE=1 SV=4; Keratin, type I cytoskeletal 10 OS=Homo sapiens OX=9606 GN=KRT10 PE=1 SV=6; Keratin, type I cytoskeletal 15 OS=Homo sapiens OX=9606 GN=KRT15 PE=1 SV=3; Keratin, type I cytoskeletal 12 OS=Homo sapiens OX=9606 GN=KRT12 PE=1 SV=1; Keratin, type I cyt…	KRT14	0.401804	0.361042	0.873358	0.927563	0.319088	1	0.508215	0.460026	0.5716	0.478853	0.990265	2.21122	0.970593	0.962618	2.31951	13.7558	1	1.06445	1.33754	1.60584	1.11394	2.89107	0.698989	0.714561	1.24793	1.40271	0.624599	1	0.355892	0.731249	1.31062	7.17505	0.840947
lASyLDR	Y4	P05783	Keratin, type I cytoskeletal 18 OS=Homo sapiens OX=9606 GN=KRT18 PE=1 SV=2	KRT18	0.675833	0.565919	0.803078	0.921824	0.594173	1	0.708793	0.758465	0.77711	0.634504	1.01429	1.61423	0.848021	1.01444	1.44867	5.35262	1	1.10129	0.961997	1.13124	0.931433	1.5434	0.807991	1.00456	1.04935	1.25716	0.771035	1	0.818865	0.773684	1.07984	4.18465	1.15225
lcDFGSASHVADNDITPyLVSR	C2; T16	Q13523	Serine/threonine-protein kinase PRP4 homolog OS=Homo sapiens OX=9606 GN=PRPF4B PE=1 SV=3	PRPF4B	0.534486	0.579585	1.08302	0.976124	0.820779	1	0.66984	0.618348	0.900426	0.555309	0.683453	0.868234	0.947379	0.883984	1.53183	1.04571	1	0.660246	1.07963	1.11213	1.01352	1.13457	0.689433	0.867466	0.961265	1.00248	0.871336	1	0.860777	0.88587	0.851992	1.03648	0.918964
lcDFGSASHVADNDITPyLVSR	C2; Y18	Q13523	Serine/threonine-protein kinase PRP4 homolog OS=Homo sapiens OX=9606 GN=PRPF4B PE=1 SV=3	PRPF4B	0.584027	0.647648	1.21915	1.14684	0.859147	1	0.953889	0.804625	0.955958	0.745178	0.784147	1.00155	0.986319	0.702251	1.42681	0.920981	1	0.930684	0.921159	1.02059	0.719654	1.23014	0.724226	0.827096	0.955209	1.00492	0.8997	1	0.785535	0.815775	0.866189	0.875379	0.879573
lcyVALDFEQEMATAASSSSLEk	C2; Y3; K23	P60709; Q6S8J3; P63261	Actin, cytoplasmic 1 OS=Homo sapiens OX=9606 GN=ACTB PE=1 SV=1; POTE ankyrin domain family member E OS=Homo sapiens OX=9606 GN=POTEE PE=2 SV=3; Actin, cytoplasmic 2 OS=Homo sapiens OX=9606 GN=ACTG1 PE=1 SV=1	ACTB	0.754371	0.796142	0.789629	0.789737	0.983787	1	0.807176	1.10754	1.06131	1.12928	1.26199	0.844931	1.03186	1.54329	0.778483	2.63541	1	1.39828	1.35967	1.59528	1.17195	2.30521	1.73703	1.71205	1.04724	1.74204	2.06404	1	1.46357	1.33294	2.0202	3.49741	1.54856
lIEDNEyTAR	Y7	P06239; P07947; P06241; P12931	Tyrosine-protein kinase Lck OS=Homo sapiens OX=9606 GN=LCK PE=1 SV=6; Tyrosine-protein kinase Yes OS=Homo sapiens OX=9606 GN=YES1 PE=1 SV=3; Tyrosine-protein kinase Fyn OS=Homo sapiens OX=9606 GN=FYN PE=1 SV=3; Proto-oncogene tyrosine-protein kinase Src OS=Homo sapiens OX=9606 GN=SRC PE=1 SV=3	LCK	0.457748	0.419105	0.515472	0.520994	0.498191	1	0.837245	1.29234	2.42398	11.9786	54.2331	0.000865578	0.000865578	0.501173	0.443337	0.607867	1	0.520918	0.666986	4.44207	12.6552	103.595	0.00679597	0.0597849	0.316225	0.266873	0.607215	1	0.977818	0.859247	2.07511	10.9741	39.556
lISEIEyR	Y7	Q8WX93	Palladin OS=Homo sapiens OX=9606 GN=PALLD PE=1 SV=3	PALLD	0.657498	0.739825	0.604341	0.79988	0.778613	1	1.02454	1.06184	1.30579	4.4467	24.6049	0.169144	0.580956	0.138672	0.473845	0.937846	1	0.820536	0.498122	1.62466	3.20237	23.989	0.578995	0.805042	0.925328	0.820037	0.970644	1	0.970739	1.0606	1.23831	4.77312	21.5592
lIyLVPEk	Y3; K8	Q9NZM3	Intersectin-2 OS=Homo sapiens OX=9606 GN=ITSN2 PE=1 SV=3	ITSN2	0.923124	0.940538	0.944956	1.03796	0.98904	1	1.06901	1.08563	1.13176	1.49758	9.17982	0.774687	0.596651	0.674674	0.768727	0.767418	1	0.698492	0.823023	1.20553	1.314	8.22548	0.866104	0.717962	0.991174	1.1754	1.16334	1	1.10253	1.50623	1.12383	2.03396	12.2176
lLEGEDAHLTQyk	Y12; K13	Q04695	Keratin, type I cytoskeletal 17 OS=Homo sapiens OX=9606 GN=KRT17 PE=1 SV=2	KRT17	0.351661	0.438003	1.04963	0.97947	0.800152	1	0.805508	0.707074	1.10478	1.25518	4.62487	0.82392	0.728134	0.292707	1.31701	2.53081	1	1.09336	0.894067	1.91071	1.95143	10.8634	0.656796	0.814435	0.955255	1.00122	0.746979	1	0.748213	0.675161	1.01617	3.12198	4.49262
lPSSPVyEDAASFk	Y7; K14	Q14247	Src substrate cortactin OS=Homo sapiens OX=9606 GN=CTTN PE=1 SV=2	CTTN	0.898491	0.602836	1.03324	0.665982	1.1872	1	0.990801	1.05261	1.22382	6.65385	28.1743	0.207179	0.60124	0.464274	0.41882	0.726865	1	0.501695	0.593382	1.97111	4.01993	42.4461	1.00933	0.130047	0.843478	0.954583	1.90793	1	0.766067	1.36721	0.972036	6.98661	29.6797
lQLDNQyAVLENQk	Y7; K14	Q9UKY7	Protein CDV3 homolog OS=Homo sapiens OX=9606 GN=CDV3 PE=1 SV=1	CDV3	2.28477	2.92965	2.21227	1.51327	2.44774	1	2.23681	2.11864	1.20579	3.10797	9.29595	1.22075	2.00943	1.56544	2.19975	4.00853	1	1.05762	1.71066	1.44261	3.22779	15.4132	1.02086	0.477748	1.56032	1.20015	0.987314	1	0.658533	1.24477	0.525467	1.24193	5.2164
lSLEGDHSTPPsAYGSVk	S12; K18	A6NMY6; P07355	Putative annexin A2-like protein OS=Homo sapiens OX=9606 GN=ANXA2P2 PE=5 SV=2; Annexin A2 OS=Homo sapiens OX=9606 GN=ANXA2 PE=1 SV=2	ANXA2P2	0.298173	0.19333	0.888729	0.742025	0.653303	1	0.437148	0.419502	0.630932	1.54017	3.83057	0.401737	0.0871663	0.298326	0.834378	0.976884	1	0.370169	0.442393	0.761658	1.2767	12.0076	0.058334	0.058334	0.536521	0.4651	0.906166	1	0.709599	0.614364	0.699438	1.81291	3.0481
lSLEGDHSTPPsAYGSVk	Y14; K18	A6NMY6; P07355	Putative annexin A2-like protein OS=Homo sapiens OX=9606 GN=ANXA2P2 PE=5 SV=2; Annexin A2 OS=Homo sapiens OX=9606 GN=ANXA2 PE=1 SV=2	ANXA2P2	0.217143	0.267885	0.750384	0.746912	0.778582	1	0.42596	0.408801	0.590169	1.47118	3.47648	0.298088	0.281915	0.316744	0.835332	1.06104	1	0.471545	0.340819	0.905369	1.49322	12.9701	0.403933	0.293716	0.616618	0.75738	0.711076	1	0.554115	0.573058	0.598118	2.69665	4.07314
lSLGQyDNDAGGQLPFSk	Y6; K18	Q68CZ2	Tensin-3 OS=Homo sapiens OX=9606 GN=TNS3 PE=1 SV=2	TNS3	0.718778	0.635496	0.667976	0.671154	0.76009	1	1.05477	0.94173	1.05187	1.93587	3.89883	0.626078	0.474548	0.737014	0.699128	0.75104	1	0.973997	0.892399	1.3274	2.11734	4.58334	0.834161	0.734285	0.84633	0.742623	0.80927	1	1.18589	1.07495	1.24835	2.49874	4.88592
lSSFTSyENPT	Y7	Q13882	Protein-tyrosine kinase 6 OS=Homo sapiens OX=9606 GN=PTK6 PE=1 SV=1	PTK6	0.441568	0.651882	1.40018	1.83247	0.953769	1	0.895393	0.695657	0.730255	0.861895	2.648	1.034	0.932119	0.923362	1.63772	2.48004	1	0.970092	0.627087	1.28355	1.46667	4.62157	0.999045	1.03146	1.05644	1.631	1.29484	1	1.01892	0.978575	1.01168	1.79138	3.54646
lVPVGyGIR	Y6	P29692	Elongation factor 1-delta OS=Homo sapiens OX=9606 GN=EEF1D PE=1 SV=5	EEF1D	0.909508	0.989333	1.3204	1.05442	1.01681	1	1.11923	0.907334	1.07791	1.5343	1.98893	0.813336	0.897488	0.978718	1.18864	1.73908	1	0.807958	0.975821	1.07804	1.47605	2.40985	0.86288	0.721706	1.38839	1.0707	0.969875	1	1.11894	0.765024	1.11751	2.75624	2.15693
lVyDGIR	Y3	P35221	Catenin alpha-1 OS=Homo sapiens OX=9606 GN=CTNNA1 PE=1 SV=1	CTNNA1	1.2784	1.08427	1.17927	1.15106	1.20212	1	1.27916	1.42224	1.32677	1.09397	3.50481	1.21745	1.06425	0.956433	0.929349	1.21917	1	1.2355	1.20477	1.54877	1.00908	3.25616	1.17723	0.948073	1.12144	1.03903	1.22945	1	1.16267	1.16087	1.15325	1.38168	3.15575
lYDAyELk	Y5; K8	P08758	Annexin A5 OS=Homo sapiens OX=9606 GN=ANXA5 PE=1 SV=2	ANXA5	0.834052	0.886967	1.03137	1.16508	1.06351	1	1.06004	1.02083	1.01914	1.10304	1.32418	0.647331	0.614084	0.651937	0.775113	1.15602	1	0.851134	0.841167	0.952185	1.06437	1.18463	0.700367	0.794351	0.690529	0.762443	0.727101	1	0.915874	0.860509	0.881587	1.57329	0.996168
lyDLNMPAYVk	Y2; K11	P16333	Cytoplasmic protein NCK1 OS=Homo sapiens OX=9606 GN=NCK1 PE=1 SV=1	NCK1	1.24186	0.764091	1.37172	0.870786	1.4594	1	1.24639	0.990586	1.01339	3.89186	6.77837	0.264902	0.404034	0.580271	0.356422	0.593966	1	0.660089	0.581483	0.997493	2.15993	4.70641	0.382143	0.3924	1.62233	0.767963	1.39738	1	1.56767	1.91285	1.02093	4.87394	7.07552
lyEWISIDkDEAGAk	Y2; K9; K15	O15357	Phosphatidylinositol 3,4,5-trisphosphate 5-phosphatase 2 OS=Homo sapiens OX=9606 GN=INPPL1 PE=1 SV=2	INPPL1	1.02479	1.04538	1.04753	1.00935	1.13445	1	1.10577	0.945987	1.13358	2.20135	4.7462	0.798482	0.752459	0.786589	0.579913	0.880568	1	0.950453	0.78297	1.23157	1.6225	5.21466	0.932046	0.964371	1.0385	1.03687	1.22121	1	1.0733	1.09621	1.10884	2.4834	4.91034
lYTyIQSR	Y4	O43781	Dual specificity tyrosine-phosphorylation-regulated kinase 3 OS=Homo sapiens OX=9606 GN=DYRK3 PE=1 SV=3	DYRK3	1.18933	1.0774	1.16626	1.17562	1.07952	1	1.06213	1.13918	1.10716	1.13354	1.33883	0.892346	0.938052	0.929851	0.891181	0.847263	1	0.960844	0.990434	0.977811	0.929303	1.42715	0.999267	0.882265	0.906199	1.05667	0.992644	1	0.993576	0.907937	0.805139	0.957374	1.45764
mVVESAyEVIk	Y7; K11	P07195	L-lactate dehydrogenase B chain OS=Homo sapiens OX=9606 GN=LDHB PE=1 SV=2	LDHB	0.846531	0.758231	0.79223	0.712942	0.881235	1	1.00771	0.96893	0.915138	0.999491	1.41145	0.704422	0.838454	0.868147	0.611801	0.779567	1	1.01892	0.806889	0.856526	1.01651	1.55394	0.856785	0.947227	0.968822	0.902121	0.887513	1	1.2598	1.16215	0.800397	1.37932	1.65501
nAIkVPIVINPNAyDNLAIYk	K4; Y14; K21	Q9H792	Inactive tyrosine-protein kinase PEAK1 OS=Homo sapiens OX=9606 GN=PEAK1 PE=1 SV=4	PEAK1	0.703976	0.65629	0.628209	0.697114	0.716724	1	1.01608	1.00502	0.928936	1.379	1.90509	0.689585	0.734398	0.741792	0.725032	0.991539	1	1.03277	0.983423	0.989736	1.22423	1.67613	0.632415	0.512475	0.668756	0.59767	0.760802	1	0.972795	1.04488	1.00628	1.24299	2.19179
nASTFEDVTQVSSAyQk	Y15; K17	Q14247	Src substrate cortactin OS=Homo sapiens OX=9606 GN=CTTN PE=1 SV=2	CTTN	0.953209	0.744804	1.28147	1.02573	1.08078	1	1.19781	1.49216	0.901644	2.6107	6.42375	1.03187	0.612535	0.745261	0.79491	0.84268	1	0.917594	1.04899	1.70251	2.48066	6.56363	1.04862	0.794079	1.03661	1.12057	0.8292	1	1.05168	1.18271	1.18151	3.00876	6.20744
nDSDPTyGQQGHPNTWk	Y7; K17	Q93052	Lipoma-preferred partner OS=Homo sapiens OX=9606 GN=LPP PE=1 SV=1	LPP	0.390464	0.299743	0.347664	0.556593	0.576523	1	0.982372	1.11141	1.07207	7.34045	10.9657	0.306425	0.2099	0.263194	0.395558	0.414885	1	0.6131	0.596418	1.2699	4.89896	10.795	0.302475	0.232109	0.307807	0.474306	0.666726	1	0.861754	1.20798	0.990034	6.22568	10.4161
nEEENIySVPHDSTQGk	S8; K17	Q9NRY4	Rho GTPase-activating protein 35 OS=Homo sapiens OX=9606 GN=ARHGAP35 PE=1 SV=3	ARHGAP35	1.0485	0.81408	1.57715	0.743593	1.01947	1	1.26985	0.820782	1.1445	1.61041	5.65393	1.63551	1.85292	1.87238	0.558905	1.14732	1	2.97115	2.58717	3.54351	1.38296	20.7654	2.15539	1.21409	1.90642	1.01325	1.36091	1	2.2364	2.97204	2.52002	3.44071	11.0743
nEEENIySVPHDSTQGk	Y7; K17	Q9NRY4	Rho GTPase-activating protein 35 OS=Homo sapiens OX=9606 GN=ARHGAP35 PE=1 SV=3	ARHGAP35	1.89836	1.28248	3.46541	2.02057	0.861957	1	3.21364	3.06018	3.46845	2.75223	8.51036	1.23266	1.75728	2.05164	1.01987	1.15348	1	2.56045	2.17849	2.68685	1.40793	18.9046	3.41225	1.42935	3.51645	1.53403	1.97918	1	2.96233	4.24572	3.39833	2.53229	17.418
nEGFyADPYLYHEGR	Y5	Q5T5P2	Sickle tail protein homolog OS=Homo sapiens OX=9606 GN=KIAA1217 PE=1 SV=2	KIAA1217	0.946922	0.867279	1.22071	0.997603	1.43927	1	0.988154	0.941142	0.466397	1.95019	4.19495	0.693133	0.289525	0.321749	0.394152	1.52942	1	0.549078	0.391145	0.459103	0.893565	5.0897	1.02183	0.69735	0.929876	0.611705	1.81864	1	0.829375	1.22479	0.424315	2.02597	4.14642
nEGFyADPYLYHEGR	Y9	Q5T5P2	Sickle tail protein homolog OS=Homo sapiens OX=9606 GN=KIAA1217 PE=1 SV=2	KIAA1217	0.622458	0.734697	0.594153	0.522415	0.251556	1	0.750433	1.76664	1.51751	6.22297	13.8244	0.249165	0.442584	0.296537	0.661141	0.823554	1	0.724072	0.839254	1.58234	5.69648	10.9812	0.696979	0.0174609	0.664616	0.45866	0.585973	1	0.9985	1.02279	1.67799	5.1406	11.7318
nGDVSQFPyVEFTGR	Y9	Q9NUM4	Transmembrane protein 106B OS=Homo sapiens OX=9606 GN=TMEM106B PE=1 SV=2	TMEM106B	0.225882	0.39827	0.391979	0.616098	0.361959	1	1.15363	1.40254	1.85108	13.102	33.0317	0.341306	0.353795	0.338397	0.363913	0.512887	1	1.06282	1.14458	2.43256	11.9563	41.2592	0.194362	0.365906	0.84742	0.61666	0.673421	1	1.12299	1.14213	1.68606	12.4181	30.1973
nLSEGNNANYTEyVATR	Y13	O76039	Cyclin-dependent kinase-like 5 OS=Homo sapiens OX=9606 GN=CDKL5 PE=1 SV=1	CDKL5	1.17592	1.12126	1.40833	1.06369	1.13516	1	1.60168	1.42099	1.28273	1.15104	1.75137	0.84517	0.948572	0.896852	0.759326	1.15631	1	1.29279	1.09384	1.41887	1.10863	1.90002	1.20551	0.718388	1.04177	1.02797	1.27428	1	1.24547	1.25025	1.29437	1.40036	2.13773
nMAEQIIQEIySQIQSk	Y11; K17	P29401	Transketolase OS=Homo sapiens OX=9606 GN=TKT PE=1 SV=3	TKT	0.78367	0.888747	0.906682	0.827999	1.14588	1	1.04555	1.02262	1.10194	1.35177	6.65551	0.471337	0.721467	0.826875	0.513905	1.13672	1	0.951114	0.778367	1.00495	0.937787	6.08172	0.0762461	1.0389	0.83358	0.828377	1.09811	1	1.69717	1.64792	1.88031	1.43032	8.77683
nPGFyVEANPMPTFk	Y5; K15	P19174	1-phosphatidylinositol 4,5-bisphosphate phosphodiesterase gamma-1 OS=Homo sapiens OX=9606 GN=PLCG1 PE=1 SV=1	PLCG1	1.78809	1.42844	1.49593	1.43509	1.61956	1	1.74844	1.71276	1.44159	1.7818	2.50893	0.971935	0.732404	1.22614	0.547104	1.00497	1	1.19122	1.42971	1.03994	0.714653	1.62422	1.93313	0.847412	1.57151	1.38092	1.31479	1	1.28586	1.36062	1.17425	1.39971	2.50179
nPGNQAAyEHFETMk	Y8; K15	P18206	Vinculin OS=Homo sapiens OX=9606 GN=VCL PE=1 SV=4	VCL	0.878641	0.895343	0.774906	0.710985	0.995552	1	1.23853	1.18405	1.10784	1.34331	1.99402	0.530587	0.801533	0.621692	0.451824	0.73671	1	1.04347	0.827435	0.880888	1.11119	1.20608	1.03545	0.857744	0.773061	0.778696	1.10998	1	1.55735	1.6913	1.00076	1.19559	2.71916
nSFNNPAyYVLEGVPHQLLPPEPPSPAR	Y8	O15357	Phosphatidylinositol 3,4,5-trisphosphate 5-phosphatase 2 OS=Homo sapiens OX=9606 GN=INPPL1 PE=1 SV=2	INPPL1	0.815783	0.82095	0.867751	0.808881	0.904691	1	1.17568	1.0134	1.06323	2.49353	5.17213	0.0540906	0.574279	0.6599	0.502412	0.0540906	1	1.49892	1.68679	1.38346	2.26022	8.7426	0.681982	0.984666	0.953181	1.13841	1.09636	1	1.19981	1.32458	1.2714	2.80599	5.62662
nSYVAGQyDDAASYQR	Y8	P11413	Glucose-6-phosphate 1-dehydrogenase OS=Homo sapiens OX=9606 GN=G6PD PE=1 SV=4	G6PD	0.711826	0.623842	0.81277	0.994387	0.929023	1	0.887845	0.922697	0.793794	1.15128	1.24642	0.859379	0.745279	0.615367	0.813991	1.20239	1	0.961926	0.830548	1.06878	1.07209	1.60185	0.627624	0.493683	0.724949	0.934581	0.857106	1	0.693979	0.789912	0.882787	1.28994	1.1691
nTyNQTALDIVNQFTTSQASR	Y3	Q8WXE0	Caskin-2 OS=Homo sapiens OX=9606 GN=CASKIN2 PE=1 SV=2	CASKIN2	0.811084	0.54859	0.749112	0.804947	0.744695	1	0.935509	0.901757	0.961913	1.50005	3.41635	0.319824	0.678786	0.335207	0.610845	0.459141	1	0.971433	0.865656	1.11423	1.22441	4.07873	0.56808	0.822962	0.692345	0.752097	1.10739	1	1.19521	1.55184	1.47937	1.73869	3.5972
nWEDEDFYDsDDDTFLDR	S10	Q9BWU0	Kanadaptin OS=Homo sapiens OX=9606 GN=SLC4A1AP PE=1 SV=1	SLC4A1AP	0.936047	0.472808	0.635849	0.855705	0.614886	1	0.506543	0.692642	0.906982	1.19004	0.757084	0.956474	1.04001	0.829898	0.940506	1.00247	1	1.05701	1.00696	0.89814	1.27065	1.24515	0.726588	1.05143	1.00156	0.91457	0.957677	1	0.731611	0.853362	0.514343	0.905045	0.821564
pyQYPALTPEQk	Y2; K12	P04075	Fructose-bisphosphate aldolase A OS=Homo sapiens OX=9606 GN=ALDOA PE=1 SV=2	ALDOA	0.907103	0.827056	1.08576	0.984204	0.798314	1	0.948282	0.955231	1.13603	1.12049	1.89242	1.00303	0.871244	0.698947	0.996804	1.37208	1	1.08293	1.03532	1.00413	1.44465	2.64297	1.27284	1.1017	1.20467	1.09152	0.815785	1	0.940299	0.944767	1.12293	1.83282	2.5745
qADEEMTGyVATR	Y9	Q15759	Mitogen-activated protein kinase 11 OS=Homo sapiens OX=9606 GN=MAPK11 PE=1 SV=2	MAPK11	1.103	0.941526	1.09373	1.88052	1.18084	1	1.13723	1.48664	1.16901	1.71377	1.72159	0.700157	0.924654	0.955593	1.12885	0.740323	1	0.852089	0.801428	1.07855	1.41906	0.979732	1.3258	0.824724	0.724268	1.99704	1.18336	1	1.2927	1.22978	0.977016	1.29684	1.66553
qADSEMTGyVVTR	Y9	P53778	Mitogen-activated protein kinase 12 OS=Homo sapiens OX=9606 GN=MAPK12 PE=1 SV=3	MAPK12	0.785763	0.859179	0.80559	1.37886	0.981935	1	0.885966	1.18078	0.844694	1.51881	1.70298	0.603157	0.690122	0.61499	0.815866	0.774346	1	0.80371	0.759462	0.796366	1.47995	1.3201	0.715252	0.618703	0.686971	1.5114	1.09639	1	1.16117	1.16382	0.805908	1.45618	2.01555
qASEQNWANySAEQNR	Y10	P17302	Gap junction alpha-1 protein OS=Homo sapiens OX=9606 GN=GJA1 PE=1 SV=2	GJA1	0.946976	0.828181	0.904627	0.985483	0.868825	1	1.0254	1.18365	0.88805	0.838354	0.765503	0.0558104	0.524386	0.9298	1.11631	0.789501	1	0.851333	0.872018	1.36815	0.975616	1.93081	0.740868	0.729993	0.984982	0.844543	0.876926	1	0.932874	1.15229	0.81999	1.09882	1.44652
qEDAPVVyLGSFR	Y8	Q86YV5	Inactive tyrosine-protein kinase PRAG1 OS=Homo sapiens OX=9606 GN=PRAG1 PE=1 SV=4	PRAG1	0.535697	0.394581	0.445331	0.501862	0.404954	1	0.984151	1.06061	1.041	4.51378	4.09647	0.420661	0.427937	0.400366	0.523436	0.469008	1	1.05858	0.850563	1.66444	4.41699	5.25917	0.594296	0.354068	0.448405	0.550053	0.546601	1	1.01242	1.02631	1.288	4.60882	4.60353
qGyVIYR	Y3	P61313	60S ribosomal protein L15 OS=Homo sapiens OX=9606 GN=RPL15 PE=1 SV=2	RPL15	2.74916	2.15601	2.13174	1.93176	1.51609	1	2.69631	2.71494	2.77382	1.663	2.35367	1.31108	1.31164	1.28698	0.722865	1.48781	1	1.55486	1.53643	1.61838	0.962135	1.94197	1.78549	1.45945	1.48991	1.01883	1.46364	1	1.55975	1.8683	1.3849	1.81117	1.63191
qGyVIYR	Y6	P61313	60S ribosomal protein L15 OS=Homo sapiens OX=9606 GN=RPL15 PE=1 SV=2	RPL15	1.3416	1.03788	1.61394	1.16337	0.780256	1	1.54906	1.14638	1.16889	0.989549	1.31528	1.89229	1.29095	1.51262	0.731782	3.99254	1	1.94508	1.83155	2.64014	1.03068	2.62813	2.20325	1.63382	2.32697	1.48325	1.51091	1	1.42902	2.11585	1.4476	4.56248	1.63909
qHyIDLk	Y3; K7	O60361; P22392	Putative nucleoside diphosphate kinase OS=Homo sapiens OX=9606 GN=NME2P1 PE=5 SV=1; Nucleoside diphosphate kinase B OS=Homo sapiens OX=9606 GN=NME2 PE=1 SV=1	NME2P1	0.61639	0.956734	0.957747	0.722962	1.02456	1	0.760628	0.835922	0.918452	0.905572	1.3466	1.05752	1.26743	0.898972	1.52925	1.45591	1	0.576484	0.619619	0.561156	0.789863	1.08348	0.693324	0.670573	0.786786	0.934017	1.06309	1	0.735048	0.717955	0.864741	0.950253	1.14663
qLIIEDPyYGNDSDFETVYQQcVR	Y8; C22	P24666	Low molecular weight phosphotyrosine protein phosphatase OS=Homo sapiens OX=9606 GN=ACP1 PE=1 SV=3	ACP1	0.89215	0.934678	0.999818	0.917277	0.648508	1	1.08615	1.17678	1.43705	1.54763	8.85555	0.930955	0.828357	0.799186	0.693829	0.835929	1	1.0303	1.21001	1.44279	1.84464	9.4381	0.704105	0.913579	0.881653	1.00602	0.693869	1	1.48523	1.10227	1.70256	1.7253	10.4883
qQQMVVAHQySFAPDGEAR	Y10	Q68CZ2	Tensin-3 OS=Homo sapiens OX=9606 GN=TNS3 PE=1 SV=2	TNS3	0.505834	0.583715	0.568447	0.662172	0.692723	1	0.996066	1.23861	1.30256	5.32516	7.29334	0.0155942	0.428691	0.435769	0.364805	0.740119	1	0.899534	0.603549	1.11526	4.42829	5.36207	0.970135	0.70498	0.579596	0.852659	0.940426	1	1.73832	1.95509	1.7299	7.62742	11.3348
qSPEDVyFSk	Y7; K10	P29317	Ephrin type-A receptor 2 OS=Homo sapiens OX=9606 GN=EPHA2 PE=1 SV=2	EPHA2	1.07176	0.83222	1.47187	1.05777	1.34285	1	0.786028	0.849403	0.689943	1.26759	1.79852	0.636326	0.581707	0.758514	1.253	0.896871	1	0.970457	0.705964	1.24727	1.29183	3.09	0.86613	0.4595	0.59112	1.22563	1.19042	1	0.811725	0.853516	0.534412	1.539	1.49757
qVAYIyk	Y6; K7	Q01518	Adenylyl cyclase-associated protein 1 OS=Homo sapiens OX=9606 GN=CAP1 PE=1 SV=5	CAP1	0.714627	0.667945	0.776569	0.773376	0.802768	1	0.983362	1.00713	0.773447	1.03432	1.34077	0.720002	0.641905	0.701293	0.699401	1.01662	1	0.627244	0.814561	0.951527	0.939395	1.58961	0.815255	0.83035	0.727723	0.772497	0.780464	1	0.923551	0.977641	1.0809	1.28699	1.30139
qVVESAyEVIk	Y7; K11	P00338	L-lactate dehydrogenase A chain OS=Homo sapiens OX=9606 GN=LDHA PE=1 SV=2	LDHA	0.839098	0.85488	0.86616	0.768144	0.938454	1	0.952931	0.947453	0.886	1.00095	1.70178	0.599767	0.688737	0.739475	0.881404	0.979283	1	0.906557	0.80195	0.955352	0.968161	1.86577	0.712725	0.650923	0.736088	0.898561	0.836359	1	0.937304	0.865143	0.86366	1.25097	1.93097
qyATLDVYNPFETR	Y2	O14828	Secretory carrier-associated membrane protein 3 OS=Homo sapiens OX=9606 GN=SCAMP3 PE=1 SV=3	SCAMP3	0.491273	1.18556	1.10368	0.905004	0.707161	1	0.663872	0.734233	0.930175	1.66175	4.03408	0.0853454	0.0853454	0.0853454	0.0853454	0.0853454	1	1.01024	0.841315	0.923147	1.31108	4.59914	0.709655	0.877149	0.0740722	1.02455	0.742957	1	1.19016	1.25561	1.69713	2.81166	6.33524
rAEDGSVIDyELIDQDAR	Y10	P07355	Annexin A2 OS=Homo sapiens OX=9606 GN=ANXA2 PE=1 SV=2	ANXA2	0.821545	0.845245	0.819261	0.911953	0.856786	1	0.993937	0.954696	0.973035	1.24236	3.46866	0.570291	0.582853	0.492065	1.00829	1.46878	1	0.713781	0.64921	0.857749	0.861531	3.49503	0.0900401	0.522306	0.447368	0.991951	1.01607	1	0.774171	0.775553	0.851967	2.0976	3.27859
rAQIPEGDyLSYR	Y9	Q96RT1	Erbin OS=Homo sapiens OX=9606 GN=ERBIN PE=1 SV=2	ERBIN	0.983188	0.991841	1.12334	0.875611	1.30091	1	1.09927	0.476542	0.808871	1.56301	4.034	1.14184	0.816305	0.0801524	1.27483	2.82215	1	0.756789	1.19431	1.36146	1.612	9.4773	0.0385629	0.0385629	0.863044	0.453001	1.28303	1	0.426919	0.602744	0.303173	1.56777	4.08538
rIEyIEAR	Y4	Q8WUW1	Protein BRICK1 OS=Homo sapiens OX=9606 GN=BRK1 PE=1 SV=1	BRK1	0.426674	0.402457	0.510691	0.514186	0.505314	1	0.645896	0.760307	1.03616	1.04086	8.13694	0.383774	0.475923	0.659835	0.638055	0.581903	1	0.951721	0.755571	1.5779	1.44009	10.1508	0.224226	0.530529	0.452513	0.530252	0.343516	1	0.85511	0.849954	1.17987	0.816764	8.08013
sAPAMQSSGSFNyARPk	Y13; K17	Q8WX93	Palladin OS=Homo sapiens OX=9606 GN=PALLD PE=1 SV=3	PALLD	0.717908	0.932691	0.767841	0.817944	0.878913	1	0.740314	1.01132	0.8992	1.54604	2.93597	0.52088	0.907705	0.801093	0.520039	1.20701	1	0.747048	0.91606	0.915372	2.29428	3.2559	0.988321	0.579804	1.1744	0.749964	1.28908	1	1.53674	1.37247	1.18953	1.84057	6.41768
sAyGGPVGAGIR	Y3	P08729	Keratin, type II cytoskeletal 7 OS=Homo sapiens OX=9606 GN=KRT7 PE=1 SV=5	KRT7	0.778102	0.79893	0.788349	0.875025	0.840519	1	0.876496	0.862268	0.974068	1.02467	1.97625	1.05792	0.796966	0.932739	0.975641	2.21325	1	0.966247	0.92378	1.19727	1.09658	2.38385	0.829718	0.867482	1.03163	0.995232	0.936957	1	0.840719	1.04614	0.77846	2.19524	2.2204
sDyDGIGSR	Y3	O00571	ATP-dependent RNA helicase DDX3X OS=Homo sapiens OX=9606 GN=DDX3X PE=1 SV=3	DDX3X	0.879872	0.668151	0.717937	0.643298	0.616034	1	0.883843	1.27604	0.985049	3.5246	7.37507	0.905458	0.954131	0.721945	0.686519	1.28208	1	1.16294	1.02111	1.64781	3.66645	9.48338	0.758508	0.62772	0.983699	0.681436	0.901035	1	0.932063	1.01744	1.00295	3.85468	7.36554
sESVVyADIR	Y6	O95297	Myelin protein zero-like protein 1 OS=Homo sapiens OX=9606 GN=MPZL1 PE=1 SV=1	MPZL1	0.555655	0.591269	1.30274	0.715886	0.762724	1	0.629143	0.601268	0.593246	1.94445	3.94582	0.365249	0.455934	0.655615	0.750698	0.708112	1	0.626567	0.528061	1.13748	1.65054	7.56428	0.658906	0.499839	0.866053	0.929924	1.09536	1	1.03998	0.772824	0.690285	1.87001	4.30765
sFLDSGyR	Y7	P18206	Vinculin OS=Homo sapiens OX=9606 GN=VCL PE=1 SV=4	VCL	0.747629	0.84522	0.818263	0.802685	0.843737	1	0.938322	0.896115	0.88212	1.00079	1.03592	0.826069	0.8798	0.731375	0.755356	0.920444	1	0.982393	1.0302	0.881055	1.13253	1.27805	0.809091	0.823767	0.70389	0.868747	0.804073	1	1.0473	1.02022	0.910966	1.0642	1.29522
sGLSSPIyIDLR	Y8	P11172	Uridine 5'-monophosphate synthase OS=Homo sapiens OX=9606 GN=UMPS PE=1 SV=1	UMPS	0.728268	0.887149	1.08115	0.792122	0.996696	1	0.930508	1.1373	0.802604	1.13565	1.29597	0.715643	0.624654	0.936086	1.04943	0.929795	1	0.931063	0.885504	0.980504	1.14769	1.28886	0.794253	0.750913	1.00573	1.07414	1.08501	1	0.826076	1.00725	0.728864	1.56315	1.46662
sGSYsYLEER	S5	O14974	Protein phosphatase 1 regulatory subunit 12A OS=Homo sapiens OX=9606 GN=PPP1R12A PE=1 SV=1	PPP1R12A	1.23738	1.14253	1.00846	0.998733	0.897732	1	1.27998	1.29547	1.17663	1.76057	4.29158	1.50191	1.81768	1.36724	1.00967	1.91449	1	1.56313	1.44472	1.91758	2.49976	6.58609	1.28675	0.858025	0.966179	0.856291	0.945623	1	0.893258	1.29356	0.858421	1.75756	4.04226
sHEGETAyIR	Y8	Q07955	Serine/arginine-rich splicing factor 1 OS=Homo sapiens OX=9606 GN=SRSF1 PE=1 SV=2	SRSF1	0.994425	0.667057	0.705755	0.949964	0.514002	1	0.606157	0.690836	0.801878	0.622248	1.00691	1.32318	0.897679	1.06242	0.908447	2.10323	1	0.690243	0.83438	1.07714	0.756714	1.18204	0.850033	0.86627	0.49752	0.529656	0.652917	1	0.696619	1.05373	0.74541	1.15836	0.724177
sHyADVDPENQNFLLESNLGk	Y3; K21	Q96QD8	Sodium-coupled neutral amino acid transporter 2 OS=Homo sapiens OX=9606 GN=SLC38A2 PE=1 SV=2	SLC38A2	0.777047	0.835404	0.951923	0.923118	0.874671	1	0.94794	0.957177	0.801779	1.01679	1.10613	0.553931	0.527703	0.747835	0.686395	0.616386	1	0.832901	0.742147	0.939529	1.03505	1.03471	0.727595	0.623895	0.845057	0.990081	0.881486	1	1.0106	1.04844	1.05131	1.24425	1.06326
sILyDER	Y4	P25787	Proteasome subunit alpha type-2 OS=Homo sapiens OX=9606 GN=PSMA2 PE=1 SV=2	PSMA2	0.887165	0.768453	0.801742	0.876713	0.875671	1	0.951296	1.01645	0.984621	1.06049	1.40144	0.900046	0.889633	0.859759	0.846452	1.13522	1	0.953899	0.771803	0.859167	0.927316	1.34444	0.743581	0.861637	0.803152	0.75099	0.82704	1	0.970259	0.910291	0.946284	1.27058	1.15309
sLGTGAPVIESPYGEtISPEDAPESISk	T16; K28	P33240	Cleavage stimulation factor subunit 2 OS=Homo sapiens OX=9606 GN=CSTF2 PE=1 SV=1	CSTF2	0.527223	0.893544	1.03617	1.43577	0.918372	1	1.53408	1.62891	1.39151	7.85659	21.1578	1.34168	1.19361	1.50069	0.101485	1.44875	1	1.09385	0.932848	4.57953	9.63511	33.394	1	1	11.2284	8.74324	17.7034	1	16.288	19.0436	28.7643	78.5	272.82
sLYYyIQQDTk	Y3; K11	A6NMY6; P07355	Putative annexin A2-like protein OS=Homo sapiens OX=9606 GN=ANXA2P2 PE=5 SV=2; Annexin A2 OS=Homo sapiens OX=9606 GN=ANXA2 PE=1 SV=2	ANXA2P2	0.656726	0.802208	0.799116	0.962185	0.881404	1	0.833406	0.96	0.786347	0.905712	1.14836	0.915706	0.691361	0.891984	0.893454	1.72606	1	0.768239	0.890592	1.11671	1.15521	1.48938	0.240494	0.644418	0.719416	0.671995	0.672131	1	0.654764	0.657897	0.855374	1.24953	0.893113
sLYYyIQQDTk	Y4; K11	A6NMY6; P07355	Putative annexin A2-like protein OS=Homo sapiens OX=9606 GN=ANXA2P2 PE=5 SV=2; Annexin A2 OS=Homo sapiens OX=9606 GN=ANXA2 PE=1 SV=2	ANXA2P2	0.805184	0.757455	0.810622	0.815276	0.807141	1	0.797086	0.906553	0.83762	0.987046	1.18628	0.552909	0.526684	0.689898	0.654714	1.08921	1	0.819186	0.991214	0.791297	0.964298	1.23334	0.716391	0.3794	0.583532	0.807984	0.734012	1	0.952078	0.891066	0.970598	1.43759	0.908963
sLYYyIQQDTk	Y5; K11	A6NMY6; P07355	Putative annexin A2-like protein OS=Homo sapiens OX=9606 GN=ANXA2P2 PE=5 SV=2; Annexin A2 OS=Homo sapiens OX=9606 GN=ANXA2 PE=1 SV=2	ANXA2P2	0.693773	0.865928	1.01403	1.1313	1.00223	1	0.868941	0.667004	0.948723	1.11567	1.02468	0.77055	0.494526	0.510041	0.803133	2.21191	1	1.11432	0.970341	0.836658	0.859376	0.733713	0.760221	0.837752	0.876912	0.915749	0.979808	1	0.826833	1.04242	0.805423	2.07899	1.03934
sNTSPEELGPLANQLTSDyGR	Y19	Q9Y490	Talin-1 OS=Homo sapiens OX=9606 GN=TLN1 PE=1 SV=3	TLN1	0.638193	0.383243	0.605033	0.760939	0.523842	1	1.04016	1.1293	1.00002	1.69286	3.69573	0.449982	0.342752	0.0248606	0.819635	0.64156	1	0.93517	0.735943	1.03901	1.54467	3.8258	0.0944644	1.22877	1.20824	0.711122	1.69851	1	1.5933	2.26179	1.8065	3.56831	4.61921
sREYDQLyEEYTR	Y4	O00459	Phosphatidylinositol 3-kinase regulatory subunit beta OS=Homo sapiens OX=9606 GN=PIK3R2 PE=1 SV=2	PIK3R2	0.553402	0.727848	0.70571	0.998896	0.982953	1	0.750643	0.689991	0.691509	1.03838	1.14082	0.630987	0.844445	0.684031	0.737706	1.68782	1	0.866111	0.567159	1.26315	1.06686	1.40355	1.02952	0.330458	1.25086	1.13769	1.28964	1	1.00294	1.04016	1.02172	1.63813	1.30797
sTFSTNyR	Y7	P05783	Keratin, type I cytoskeletal 18 OS=Homo sapiens OX=9606 GN=KRT18 PE=1 SV=2	KRT18	0.900757	0.755871	0.790331	0.817424	0.729388	1	0.85316	1.06172	0.937014	1.07608	1.80437	1.0007	0.812679	0.881704	0.980683	1.67933	1	1.00925	0.962703	1.14196	1.09218	2.05254	0.777121	0.889503	0.976797	0.950238	0.835221	1	0.933986	0.978507	1.0176	1.7514	1.89223
sYDyDLIIIGGGSGGLAAAk	Y4; K20	Q16881	Thioredoxin reductase 1, cytoplasmic OS=Homo sapiens OX=9606 GN=TXNRD1 PE=1 SV=3	TXNRD1	0.671335	0.704542	0.752319	0.775306	0.744385	1	0.913579	0.932958	0.995518	1.05561	1.18894	0.711822	0.682982	0.762193	0.674039	0.717008	1	0.988334	0.983338	0.955212	0.930937	1.18248	0.692154	0.751826	0.790278	0.835354	0.764686	1	0.991205	1.01955	0.978089	1.16521	1.38397
syELPDGQVITIGNER	Y2	A5A3E0; P63267; Q9BYX7; P60709; Q6S8J3; P62736; P68133; Q562R1; P68032; P63261	POTE ankyrin domain family member F OS=Homo sapiens OX=9606 GN=POTEF PE=1 SV=2; Actin, gamma-enteric smooth muscle OS=Homo sapiens OX=9606 GN=ACTG2 PE=1 SV=1; Putative beta-actin-like protein 3 OS=Homo sapiens OX=9606 GN=POTEKP PE=5 SV=1; Actin, cytoplasmic 1 OS=Homo sapiens OX=9606 GN=ACTB PE=1 SV=1; POTE ankyrin domain family member E OS=Homo sapiens OX=9606 GN=POTEE PE=2 SV=3; Actin, aortic sm…	POTEF	0.341273	0.443852	0.881645	0.884715	0.49082	1	0.553688	0.639652	0.705509	0.546675	1.33122	1.71502	0.58257	0.84315	1.52455	9.93878	1	1.6334	0.957021	1.21885	1.17236	3.26761	0.570833	0.884199	1.10514	1.17338	0.830648	1	0.637683	0.56125	0.949202	5.11216	1.28184
sYGEEDFEyHR	Y9	P04920	Anion exchange protein 2 OS=Homo sapiens OX=9606 GN=SLC4A2 PE=1 SV=4	SLC4A2	1.06333	0.609412	0.80499	0.957426	0.543901	1	1.01593	1.03732	0.646946	1.05031	1.50684	0.673443	0.540366	0.9047	0.63746	0.860305	1	1.70534	1.44358	0.929838	0.725942	1.99275	0.446574	0.643598	1.06864	1.19983	1.18055	1	1.24239	1.05403	1.05366	1.38314	1.53011
sYSPyDMLESIRk	Y5; K13	A6NMY6; P07355	Putative annexin A2-like protein OS=Homo sapiens OX=9606 GN=ANXA2P2 PE=5 SV=2; Annexin A2 OS=Homo sapiens OX=9606 GN=ANXA2 PE=1 SV=2	ANXA2P2	0.788712	0.954453	0.52949	0.612464	0.94607	1	1.04328	0.981249	1.09759	1.42101	11.0473	0.542321	0.767123	0.98399	0.486158	1.09261	1	1.30592	0.994289	1.01597	1.28679	9.13622	0.793272	0.588591	0.623777	0.672735	0.992425	1	1.32189	1.07825	1.41382	1.24513	14.6295
sYSPyDYQPcLAGPNQDFHSk	Y5; C10; K21	Q9HBL0	Tensin-1 OS=Homo sapiens OX=9606 GN=TNS1 PE=1 SV=2	TNS1	0.651205	0.495487	0.800606	0.460865	0.675211	1	1.01375	1.12844	1.2459	3.72546	4.83933	0.3763	0.158762	0.591695	0.524825	0.698209	1	0.766942	0.808792	1.63011	4.19838	5.77584	0.681874	0.612568	0.616185	0.413121	0.502794	1	0.91688	1.06968	1.31436	3.35199	3.57816
tATESFASDPILyRPVAVALDTk	Y13; K23	P14618	Pyruvate kinase PKM OS=Homo sapiens OX=9606 GN=PKM PE=1 SV=4	PKM	0.801485	0.663	0.875754	0.891693	1.02729	1	0.934292	0.831981	0.790398	1.15793	1.55414	0.801547	0.491944	0.648111	0.825745	1.32088	1	0.843932	0.678694	0.962897	0.865257	1.97065	0.695299	0.643567	0.941753	0.899543	1.03922	1	0.713017	0.772873	0.75392	1.61541	1.51985
tDDYLDQPcyETINR	C9; Y10	P50395	Rab GDP dissociation inhibitor beta OS=Homo sapiens OX=9606 GN=GDI2 PE=1 SV=2	GDI2	0.95316	0.49266	1.02818	1.0193	1.27284	1	0.907137	0.985959	0.669488	1.31884	2.31774	0.385101	0.873752	0.03692	0.817796	1.54238	1	0.503896	0.779305	0.968559	0.801242	2.37057	0.749332	0.786151	1.18135	1.13877	0.867759	1	0.962052	0.920877	0.855464	1.28793	1.42361
tESAyDWTSLSSSSIk	Y5; K16	Q70E73	Ras-associated and pleckstrin homology domains-containing protein 1 OS=Homo sapiens OX=9606 GN=RAPH1 PE=1 SV=3	RAPH1	0.373647	0.483793	0.698869	0.5761	0.69487	1	1.28567	1.28587	1.42836	7.78459	11.6887	0.464033	0.493997	0.494751	0.0952606	0.948525	1	1.32389	1.12097	2.54493	7.44262	15.9452	0.545241	0.398027	0.747703	0.287254	0.942915	1	1.17348	1.73008	1.61227	8.13208	12.7611
tGHGYVyEYPSR	Y7	Q14511	Enhancer of filamentation 1 OS=Homo sapiens OX=9606 GN=NEDD9 PE=1 SV=1	NEDD9	0.459622	0.557229	0.567223	0.64178	0.655013	1	0.68354	0.838751	0.953573	1.38154	1.31889	1.84244	0.75803	0.814281	1.69145	4.48097	1	1.60171	1.0799	1.11157	2.0125	3.42485	0.622627	0.511886	0.670914	0.787137	0.878249	1	0.915166	0.921375	0.794723	1.67127	1.51199
tHAVSVSETDDyAEIIDEEDTYTMPSTR	Y12	Q05397	Focal adhesion kinase 1 OS=Homo sapiens OX=9606 GN=PTK2 PE=1 SV=2	PTK2	1.16127	0.425591	1.59905	0.944255	1.4706	1	1.97021	1.59155	1.0861	1.51227	2.84523	0.313006	0.28705	0.997442	0.627205	0.927387	1	1.05868	0.715362	1.31055	0.94103	4.96673	0.0595895	0.0595895	0.919093	0.959965	2.19382	1	1.01531	1.24938	0.626031	1.55642	1.69928
tIAQDyGVLk	Y6; K10	Q06830	Peroxiredoxin-1 OS=Homo sapiens OX=9606 GN=PRDX1 PE=1 SV=1	PRDX1	0.878026	0.0444108	1.06044	1.58085	0.730818	1	1.27772	0.788468	0.982196	1.25532	2.42874	2.21609	0.379765	0.598968	1.30103	10.0725	1	0.944645	0.926517	1.21567	0.662847	2.78097	0.0502181	0.630139	1.27823	0.795796	0.0502181	1	0.689998	0.420063	0.414726	4.91542	1.56294
tLSEVDyAPAGPAR	Y7	O15357	Phosphatidylinositol 3,4,5-trisphosphate 5-phosphatase 2 OS=Homo sapiens OX=9606 GN=INPPL1 PE=1 SV=2	INPPL1	1.06619	0.62501	1.15045	1.03133	1.30127	1	1.40481	0.85106	0.886863	4.7557	12.6338	0.490076	0.62914	0.834446	0.907972	0.994974	1	1.02901	0.781512	1.91939	2.73611	27.1414	0.368099	0.508296	1.19503	0.884714	1.63587	1	1.24887	0.943978	1.07627	3.35904	9.857
tLyDFPGNDAEDLPFk	Y3; K16	P46109	Crk-like protein OS=Homo sapiens OX=9606 GN=CRKL PE=1 SV=1	CRKL	0.797443	0.853281	0.966287	0.885342	1.05193	1	1.09577	1.04781	1.00396	1.37727	1.87042	0.687642	0.750836	0.694041	0.766966	1.052	1	0.965173	0.999114	1.04914	1.15175	2.01196	0.721646	0.813388	0.747445	0.826318	1.00568	1	1.05843	1.07401	0.880479	1.31276	2.053
tMQFEPSTMVyDAcR	Y11; C14	Q9Y490	Talin-1 OS=Homo sapiens OX=9606 GN=TLN1 PE=1 SV=3	TLN1	1.21246	1.10367	0.999345	0.69067	1.19878	1	1.86328	2.00263	1.54366	1.70807	3.90438	0.653164	1.06702	1.19654	0.0574238	0.771084	1	1.67748	0.577517	0.567245	1.31794	1.96384	1.02641	0.761473	0.751717	0.749871	1.21864	1	1.99604	1.89843	0.716786	1.36833	4.07608
tQTPPVSPAPQPTEERLPSSPVyEDAASFk	Y23; K30	Q14247	Src substrate cortactin OS=Homo sapiens OX=9606 GN=CTTN PE=1 SV=2	CTTN	0.585454	0.709846	1.10893	0.706203	1.24853	1	0.907592	0.799562	1.04808	5.82223	19.0049	0.614543	1.2759	0.58633	0.615404	1.54334	1	0.898294	0.815408	3.38557	5.0408	52.1244	0.65685	0.365298	1.16504	0.802594	1.52025	1	0.912956	1.13082	1.27723	5.67808	25.131
tSyGWIEIVGcADR	Y3; C11	P41250	Glycine--tRNA ligase OS=Homo sapiens OX=9606 GN=GARS1 PE=1 SV=3	GARS1	1.17412	1.31168	1.20582	1.13971	1.2307	1	1.34317	1.0053	1.39477	1.15651	1.51113	0.870855	0.95888	0.721151	0.666633	1.0186	1	1.09357	0.853551	0.798942	0.82943	1.19044	1.57512	0.836494	1.15154	1.10158	1.45635	1	1.03409	1.2431	0.740604	1.66443	1.92469
tTNPFYNtM	T8	Q76I76	Protein phosphatase Slingshot homolog 2 OS=Homo sapiens OX=9606 GN=SSH2 PE=1 SV=1	SSH2	1.57136	1.62055	1.07603	0.884461	1.61148	1	1.0642	1.21363	1.11046	1.3145	1.62292	0.672092	1.302	1.29365	0.455366	1.17252	1	1.20618	1.12516	0.718827	1.23559	0.792392	1.83376	1.58301	0.96949	1.07638	2.2108	1	2.00613	2.17411	0.768521	1.23878	1.94619
tTSVISHTyEEIETESk	Y9; K17	Q9H792	Inactive tyrosine-protein kinase PEAK1 OS=Homo sapiens OX=9606 GN=PEAK1 PE=1 SV=4	PEAK1	0.530746	0.531241	0.83894	0.690245	1.00985	1	1.01951	1.14609	1.79863	1.82817	4.81589	0.790301	0.319334	0.278124	0.517809	0.636406	1	0.906069	0.730729	1.07076	1.30126	6.42191	0.0526487	0.772803	0.961563	1.00463	1.69088	1	1.38615	1.38768	1.36231	3.62878	5.18101
tVcSTyLQSR	C3; Y6	Q9H422	Homeodomain-interacting protein kinase 3 OS=Homo sapiens OX=9606 GN=HIPK3 PE=1 SV=1	HIPK3	1.2036	1.01135	0.880427	1.12647	0.929254	1	1.00255	1.23732	1.03548	0.99163	1.21641	1.23028	1.08277	1.1182	1.02492	1.10586	1	1.0748	0.962101	1.21656	0.991545	1.45541	1.12081	1.02934	1.03344	0.9632	1.13441	1	1.05833	1.06202	1.04593	1.03186	1.08927
tVPLyESPR	Y5	Q16531	DNA damage-binding protein 1 OS=Homo sapiens OX=9606 GN=DDB1 PE=1 SV=1	DDB1	1.04043	1.24956	0.92641	1.07905	0.959516	1	0.731106	1.00682	0.960275	1.39955	1.6372	0.968221	1.08799	0.83419	0.962731	1.59501	1	1.49512	1.30132	1.0395	1.42358	1.49284	0.806885	0.763318	0.778309	0.885391	0.789766	1	0.769157	1.04871	0.95629	1.10057	1.1829
tVyFAEEVQcEGNSFHk	Y3; C10; K17	P21291	Cysteine and glycine-rich protein 1 OS=Homo sapiens OX=9606 GN=CSRP1 PE=1 SV=3	CSRP1	0.68383	0.692761	0.987119	0.839868	0.744203	1	0.796081	0.766853	1.09628	0.760667	1.3201	0.754834	0.70194	0.564357	0.98859	1.00549	1	0.720909	0.866286	0.706176	0.867617	1.91329	0.682415	0.504951	0.516121	0.695947	0.808296	1	0.818345	0.919076	0.854416	1.0103	1.42192
tyDYLFk	Y2; K7	P61006; Q92930	Ras-related protein Rab-8A OS=Homo sapiens OX=9606 GN=RAB8A PE=1 SV=1; Ras-related protein Rab-8B OS=Homo sapiens OX=9606 GN=RAB8B PE=1 SV=2	RAB8A	1.20277	1.18506	1.44491	1.13794	1.3331	1	1.19574	1.26043	1.14992	1.25723	2.47012	0.941902	0.770966	0.782775	0.779072	0.956361	1	0.926056	0.918058	0.98743	0.98903	2.24457	0.974082	0.916908	0.892001	0.978178	1.11384	1	0.960865	1.0346	1.06567	1.13038	2.10021
tYVDPHTyEDPNQAVLk	Y2; K17	P29317	Ephrin type-A receptor 2 OS=Homo sapiens OX=9606 GN=EPHA2 PE=1 SV=2	EPHA2	0.918166	1.05278	0.99066	0.8758	1.33565	1	0.92639	0.885378	0.796375	1.08193	2.03478	0.524852	0.669089	0.690909	1.00251	1.00183	1	0.900783	0.784458	0.847605	0.99632	1.90385	0.78804	0.720812	0.851537	1.33343	1.46873	1	0.999989	0.883844	0.979347	1.48227	1.65822
tYVDPHTyEDPNQAVLk	Y8; K17	P29317	Ephrin type-A receptor 2 OS=Homo sapiens OX=9606 GN=EPHA2 PE=1 SV=2	EPHA2	1.17797	1.00724	1.25891	1.34216	1.42606	1	0.854787	0.954009	0.802071	1.35489	1.59811	0.827689	0.768819	0.954332	0.9048	1.19422	1	0.789345	0.690274	0.960101	0.995881	2.01043	0.998082	0.766692	1.0984	1.14226	1.42321	1	0.88821	0.86971	0.740628	1.20142	1.41155
vADPDHDHTGFLTEyVATR	Y15	P28482	Mitogen-activated protein kinase 1 OS=Homo sapiens OX=9606 GN=MAPK1 PE=1 SV=3	MAPK1	0.766162	0.662471	0.870363	1.07447	0.720298	1	1.10883	1.21691	1.22054	2.06029	0.962458	0.643759	0.656028	0.634742	0.802454	0.683778	1	0.970961	0.868077	1.24962	1.62202	0.972262	0.731422	0.665864	0.735468	1.08314	0.693443	1	1.16477	1.35105	1.09748	1.90061	1.08588
vEGDNIyVR	Y7	O43491	Band 4.1-like protein 2 OS=Homo sapiens OX=9606 GN=EPB41L2 PE=1 SV=1	EPB41L2	0.994763	0.993765	0.797674	1.03195	1.67693	1	1.09962	1.15475	0.898194	1.98029	10.6416	0.847388	0.770868	0.560162	1.18916	3.5516	1	1.35186	0.868878	1.19666	1.76229	11.0676	1.03983	0.627863	0.77214	1.48473	2.36676	1	0.722819	0.952761	1.01639	1.83996	10.8771
vGEEEHVySFPNk	Y8; K13	P49023	Paxillin OS=Homo sapiens OX=9606 GN=PXN PE=1 SV=3	PXN	0.513999	0.465236	0.650126	0.786252	0.769091	1	0.732137	0.679353	0.531862	2.33538	2.42771	0.297108	0.316885	0.498166	0.721763	0.734448	1	0.630623	0.501527	0.880252	2.12221	3.77228	0.320201	0.202603	0.501289	0.613447	0.737431	1	0.674178	0.678602	0.573655	1.88511	2.11749
vGQGYVyEAAQPEQDEYDIPR	Y7	P56945	Breast cancer anti-estrogen resistance protein 1 OS=Homo sapiens OX=9606 GN=BCAR1 PE=1 SV=2	BCAR1	1.07798	0.669014	0.681183	0.274204	0.551578	1	1.06071	1.12624	1.03774	3.59859	4.11523	0.425382	1.53321	2.51141	0.514866	1.63169	1	2.1286	1.22952	2.72179	5.03815	8.31345	1.24482	0.381989	0.741682	0.788643	1.48486	1	1.16613	1.82871	1.35365	4.67967	6.76957
vHSPSGALEEcyVTEIDQDkYAVR	C11; Y12; K20	P21333	Filamin-A OS=Homo sapiens OX=9606 GN=FLNA PE=1 SV=4	FLNA	0.62816	0.663169	0.7775	0.850224	0.86651	1	1.01168	1.15704	1.13508	1.25758	1.43358	0.654001	0.617031	0.513476	0.528421	0.77831	1	0.985465	0.863543	1.05749	1.16128	1.70833	0.817404	0.686391	0.913825	0.929417	0.930293	1	1.08947	0.908603	1.03969	1.0522	1.06553
vHTDFTPSPyDTDSLk	Y10; K16	O94885; Q9NSI8	SAM and SH3 domain-containing protein 1 OS=Homo sapiens OX=9606 GN=SASH1 PE=1 SV=3; SAM domain-containing protein SAMSN-1 OS=Homo sapiens OX=9606 GN=SAMSN1 PE=1 SV=1	SASH1	0.191511	0.63272	0.786636	0.810941	0.758033	1	0.86783	0.949828	1.53955	3.11519	13.5028	0.295088	0.286478	0.72618	0.403028	1.56266	1	0.90952	0.780549	1.55637	2.90167	14.9124	0.0515471	0.0515471	0.0515471	0.486608	0.481721	1	0.879685	1.18034	1.10064	2.50072	10.2239
vIEDDPEAVyTTTGGk	Y10; K16	Q15375	Ephrin type-A receptor 7 OS=Homo sapiens OX=9606 GN=EPHA7 PE=1 SV=3	EPHA7	0.629575	0.521041	1.23344	0.958142	1.23064	1	0.969226	0.868131	0.837089	2.59865	7.61141	0.393776	0.407546	0.303181	0.606478	0.906049	1	0.66594	0.97375	0.916166	2.02245	10.1986	0.8982	0.787046	0.728379	1.06127	1.48132	1	0.950662	1.01235	0.930148	2.73803	5.85977
vLEDDPEATyTTSGGk	Y10; K16	P29317	Ephrin type-A receptor 2 OS=Homo sapiens OX=9606 GN=EPHA2 PE=1 SV=2	EPHA2	0.995896	0.962529	1.21251	1.17903	1.26369	1	0.913668	1.11866	0.996711	1.81632	4.03519	0.473954	0.545688	0.673	0.588647	0.858631	1	0.686116	0.642124	0.854253	1.11973	4.93926	0.745358	0.629104	1.00424	1.03874	1.55777	1	1.0621	1.15348	0.896721	1.91742	3.08768
vLEDDPEATyTTSGGkIPIR	Y10; K16	P29317	Ephrin type-A receptor 2 OS=Homo sapiens OX=9606 GN=EPHA2 PE=1 SV=2	EPHA2	1.28542	1.04338	1.0562	1.17387	1.03523	1	0.848768	0.772834	0.784409	1.99246	3.90872	0.945788	1.02911	1.18313	1.05458	1.62439	1	0.907832	0.684302	1.09545	1.43114	5.98903	1.17843	0.916254	1.25395	1.3072	1.60039	1	1.22444	0.940814	1.1182	1.70373	4.1372
vPIVINPNAyDNLAIYk	Y10; K17	Q9H792	Inactive tyrosine-protein kinase PEAK1 OS=Homo sapiens OX=9606 GN=PEAK1 PE=1 SV=4	PEAK1	0.742495	0.703529	0.756277	0.711002	0.779699	1	1.12804	1.14118	1.04818	1.33654	2.2887	0.4558	0.446249	0.432643	0.428505	0.51728	1	0.868046	0.921235	1.03745	1.23972	1.45097	0.52107	0.526542	0.587486	0.6348	0.678891	1	0.923584	0.952696	0.990204	1.47793	1.93733
vPIVINPNAyDNLAIYk	Y16; K17	Q9H792	Inactive tyrosine-protein kinase PEAK1 OS=Homo sapiens OX=9606 GN=PEAK1 PE=1 SV=4	PEAK1	0.574864	0.52957	0.663887	0.543962	0.694624	1	1.03439	0.982538	1.17524	2.03707	3.47975	0.356846	0.130854	0.215137	0.185042	0.549306	1	1.08431	0.976174	1.17429	2.24322	3.64944	0.641631	0.446139	0.562187	0.673995	0.562213	1	0.953526	0.982474	1.15915	2.20193	3.06779
vQENDGkEPPPVVNyEEDAR	K7; Y15	P16591	Tyrosine-protein kinase Fer OS=Homo sapiens OX=9606 GN=FER PE=1 SV=2	FER	1.61434	1.29884	1.50057	1.33763	1.63988	1	1.42169	1.17384	1.01233	2.04872	5.27327	1.08591	1.06289	1.00624	0.786646	1.39257	1	0.744977	0.752248	1.23076	1.37996	5.25468	1.53122	0.888149	1.49059	1.27279	1.9583	1	0.968145	1.42781	0.778711	1.79502	5.01222
vSETEySALEQSTk	S7; K14	P25106	Atypical chemokine receptor 3 OS=Homo sapiens OX=9606 GN=ACKR3 PE=1 SV=3	ACKR3	0.960041	0.898166	1.09278	1.26612	1.24401	1	1.0879	0.904067	0.827136	1.20614	1.47388	0.772441	0.843909	1.03753	0.967036	1.05743	1	0.930979	0.795312	0.960277	1.16045	1.87876	1.08088	0.891955	0.920652	0.728834	1.14091	1	1.20865	1.03878	0.91162	1.33778	1.08347
vSETEySALEQSTk	Y6; K14	P25106	Atypical chemokine receptor 3 OS=Homo sapiens OX=9606 GN=ACKR3 PE=1 SV=3	ACKR3	1.06	1.02108	1.17503	1.22229	1.20698	1	0.979604	1.00938	0.909238	1.22483	1.58861	0.809113	0.739503	0.950489	0.862734	1.0881	1	0.886941	0.902414	1.00915	1.39408	2.02015	0.882006	0.714297	1.03419	1.02287	1.15753	1	0.997396	0.887991	0.957045	1.18713	1.12046
vVYENAyGQFIGPHR	Y7	Q16881	Thioredoxin reductase 1, cytoplasmic OS=Homo sapiens OX=9606 GN=TXNRD1 PE=1 SV=3	TXNRD1	0.618848	0.594103	0.572496	0.504677	0.619906	1	0.877423	0.727891	0.782085	1.0679	1.72141	0.361763	0.176513	0.486147	0.388525	0.695292	1	0.632212	0.837587	1.01714	1.13922	2.38704	0.749609	0.73937	0.83334	0.829423	1.00058	1	1.10254	0.990324	1.02582	1.12959	1.20726
vyELQASR	Y2	Q9Y262	Eukaryotic translation initiation factor 3 subunit L OS=Homo sapiens OX=9606 GN=EIF3L PE=1 SV=1	EIF3L	0.642641	0.564919	0.635093	0.816337	0.600388	1	1.18639	1.11864	1.81949	2.14917	29.6731	0.964986	0.0441714	0.654963	0.906508	1.88757	1	1.05447	1.50567	2.03325	3.16851	40.155	0.71278	1.07852	0.712149	0.887373	0.718485	1	1.17438	0.768085	1.79007	3.42541	31.4032
vYNDGYDDDNyDYIVk	Y11; K16	Q13627	Dual specificity tyrosine-phosphorylation-regulated kinase 1A OS=Homo sapiens OX=9606 GN=DYRK1A PE=1 SV=2	DYRK1A	0.682475	0.93889	0.735607	0.770418	0.965941	1	0.886315	1.17597	1.18188	1.17382	1.49518	0.628237	0.516724	1.08137	0.761604	0.933061	1	1.14611	1.02457	1.41943	0.809365	1.92317	1.26142	1.1575	0.985223	0.841623	0.763081	1	1.30293	1.00978	1.20729	1.46968	2.67943
vYTyIQSR	Y4	Q92630; Q9NR20	Dual specificity tyrosine-phosphorylation-regulated kinase 2 OS=Homo sapiens OX=9606 GN=DYRK2 PE=1 SV=3; Dual specificity tyrosine-phosphorylation-regulated kinase 4 OS=Homo sapiens OX=9606 GN=DYRK4 PE=1 SV=2	DYRK2	1.29469	1.03108	1.07915	1.11028	0.988474	1	1.14813	1.30793	1.16212	1.05829	1.2373	1.10777	1.0258	1.0928	1.05225	0.984874	1	1.16186	1.23553	1.17429	1.04433	1.18961	1.12092	1.17726	1.19427	1.08954	1.02376	1	1.05321	1.1191	1.26127	1.02977	1.17473
wDsYENLSADGEVLHTQGPVDGSLyAk	S3; Y25; K27	Q68CZ2	Tensin-3 OS=Homo sapiens OX=9606 GN=TNS3 PE=1 SV=2	TNS3	0.6376	0.696112	0.805902	0.748034	0.750129	1	1.39444	1.30904	1.5476	3.76624	4.87354	0.279353	0.305166	0.42214	0.286427	0.39017	1	1.14497	1.06344	1.67975	3.76639	5.81996	0.649747	0.580176	0.705048	0.705674	0.845588	1	1.29644	1.44394	1.56653	4.09662	5.42967
yAALSDQGLDIk	Y1; K12	Q8WX93	Palladin OS=Homo sapiens OX=9606 GN=PALLD PE=1 SV=3	PALLD	1.28824	1.27625	1.38813	1.25049	1.22711	1	1.44121	1.2884	1.24211	1.73171	3.17742	1.18539	0.753905	0.837717	0.694407	0.873549	1	0.990082	0.813166	1.2373	1.45994	2.82749	0.874671	0.709772	1.16546	1.10527	1.14241	1	1.06167	1.20129	0.954374	1.6732	3.21174
yADLPGIAR	Y1	Q13561	Dynactin subunit 2 OS=Homo sapiens OX=9606 GN=DCTN2 PE=1 SV=4	DCTN2	1.06499	0.904918	1.00416	0.939887	0.808337	1	1.34536	1.08292	1.12203	1.5037	2.92781	1.42078	1.60905	1.14188	1.43326	1.49242	1	1.44245	1.62967	2.12239	1.73005	5.27193	1.32849	0.951787	1.28626	1.00242	1.17611	1	0.935975	1.59189	1.01625	1.86972	3.49169
yAGEVyGMIR	Y6	P42356	Phosphatidylinositol 4-kinase alpha OS=Homo sapiens OX=9606 GN=PI4KA PE=1 SV=4	PI4KA	1.24435	1.37415	1.05184	1.22134	1.48365	1	1.60779	1.38566	1.07014	1.79308	4.7714	0.296619	0.892135	0.681829	0.516204	0.6569	1	0.934433	0.612513	0.5806	0.861502	3.03299	0.763248	0.630749	0.998096	0.877963	1.03438	1	1.45069	1.00457	1.10412	1.43926	4.61755
yAGsALQYEDVSTAVQNLQk	S4; K20	Q9NP79	Vacuolar protein sorting-associated protein VTA1 homolog OS=Homo sapiens OX=9606 GN=VTA1 PE=1 SV=1	VTA1	0.545821	0.891856	0.850374	1.00126	0.795934	1	0.904485	1.05451	0.842973	0.993878	1.32671	0.556093	0.640493	0.704705	0.716529	0.628367	1	0.622482	0.857712	0.846662	0.832888	1.16697	0.954137	0.702519	0.75657	0.920531	0.614022	1	0.880572	0.94295	1.21204	1.22173	1.88306
yAGsALQYEDVSTAVQNLQk	Y1; K20	Q9NP79	Vacuolar protein sorting-associated protein VTA1 homolog OS=Homo sapiens OX=9606 GN=VTA1 PE=1 SV=1	VTA1	1.0896	1.40892	1.35878	1.49996	1.15683	1	1.88738	0.65162	1.40186	1.53663	2.09099	1.04941	0.729901	0.0808409	0.842121	0.979533	1	0.688674	1.16468	1.66809	0.936469	2.10279	1.2765	2.24642	1.48186	1.59912	1.38038	1	1.5571	1.35835	1.40218	2.34097	1.85946
yATPQVIQAPGPR	Y1	Q07912	Activated CDC42 kinase 1 OS=Homo sapiens OX=9606 GN=TNK2 PE=1 SV=3	TNK2	0.745878	0.846222	0.940738	0.974663	0.889638	1	0.940321	0.909354	0.758443	0.940035	0.979167	0.893046	0.971303	0.846955	1.05871	0.860185	1	0.984553	0.930908	1.03654	1.2932	1.4992	0.864576	0.720132	1.10421	1.15382	1.09672	1	0.941624	1.08307	0.802008	1.19913	1.11677
ycRPESQEHPEADPGSAAPyLk	C2; Y20; K22	P40763	Signal transducer and activator of transcription 3 OS=Homo sapiens OX=9606 GN=STAT3 PE=1 SV=2	STAT3	0.786458	0.804397	1.01522	1.07992	1.02919	1	0.811532	0.858901	0.909036	0.827098	0.902611	0.866434	0.760994	1.37772	1.44881	1.34934	1	0.620399	0.748944	0.851976	0.944635	1.20785	0.791517	0.972261	1.00512	0.998645	1.01155	1	0.914284	0.899001	0.803872	0.946233	0.975047
yIDQEELNk	Y1; K9	P07900; P08238; Q58FF8; Q14568	Heat shock protein HSP 90-alpha OS=Homo sapiens OX=9606 GN=HSP90AA1 PE=1 SV=5; Heat shock protein HSP 90-beta OS=Homo sapiens OX=9606 GN=HSP90AB1 PE=1 SV=4; Putative heat shock protein HSP 90-beta 2 OS=Homo sapiens OX=9606 GN=HSP90AB2P PE=1 SV=2; Heat shock protein HSP 90-alpha A2 OS=Homo sapiens OX=9606 GN=HSP90AA2P PE=1 SV=2	HSP90AA1	0.930578	0.78172	0.79218	0.861966	0.878689	1	0.824425	0.93845	0.731906	0.876615	1.3552	0.734019	0.719589	0.709043	0.889647	2.01535	1	0.969107	0.718148	1.02386	0.890007	1.82787	0.876087	0.752933	0.891891	0.905989	0.999403	1	0.750553	0.846728	0.958524	2.01022	1.27325
yIEVFk	Y1; K6	P52597	Heterogeneous nuclear ribonucleoprotein F OS=Homo sapiens OX=9606 GN=HNRNPF PE=1 SV=3	HNRNPF	1.05603	1.04455	1.08548	1.33581	1.14615	1	1.04031	1.01787	0.869709	0.854017	1.34024	1.26256	0.952956	1.29481	0.986908	2.28491	1	0.884368	1.00699	1.01608	1.09648	1.5333	1.09609	1.10131	1.14076	1.26621	0.921375	1	0.952	1.06448	0.829433	2.09138	1.2338
yIEVTSAR	Y1	Q8IZW8	Tensin-4 OS=Homo sapiens OX=9606 GN=TNS4 PE=1 SV=3	TNS4	1.11479	0.944915	0.993361	0.86024	0.632812	1	1.89136	2.16573	1.96435	11.3673	12.1546	0.554304	0.437001	0.491201	0.4099	0.652174	1	1.09305	0.913587	2.14925	7.1585	9.95243	0.755656	0.645054	0.758474	0.691454	0.794027	1	1.61349	1.98424	1.81927	10.6856	8.97227
yLDPEyIDR	Y6	O75935	Dynactin subunit 3 OS=Homo sapiens OX=9606 GN=DCTN3 PE=1 SV=1	DCTN3	0.611834	0.488866	0.687504	0.636515	0.76287	1	0.830832	0.706174	0.663439	1.19464	2.33682	0.33595	0.361077	0.378387	0.499633	0.682115	1	0.73703	0.546155	0.856852	0.981058	3.01302	0.514874	0.358961	0.533894	0.66327	0.806704	1	0.775602	0.733762	0.612082	1.1856	2.51347
yLYEIAR	Y1	P02768	Serum albumin OS=Homo sapiens OX=9606 GN=ALB PE=1 SV=2	ALB	0.867836	0.675958	3.71336	1.86868	0.503612	1	1.18114	1.12309	2.07041	0.913685	1.4418	4.10853	1.19364	1.80522	2.35068	10.1326	1	1.55421	1.26826	2.40245	0.910727	3.68361	2.15514	2.40907	5.45807	1.78057	0.97921	1	0.635745	1.08513	3.27587	9.00596	1.2587
yLYEIAR	Y3	P02768	Serum albumin OS=Homo sapiens OX=9606 GN=ALB PE=1 SV=2	ALB	0.912734	0.666315	4.04949	1.73255	0.371203	1	1.22049	1.05292	2.15298	0.801795	1.60782	12.3736	3.28072	3.78837	4.91272	26.1629	1	3.07456	3.36527	5.92782	1.10171	9.17448	2.57826	2.89895	6.23273	2.10012	1.22817	1	0.958143	0.95303	4.04729	10.5192	1.62999
yQDVyVELSHIk	Y5; K12	Q9H2D6	TRIO and F-actin-binding protein OS=Homo sapiens OX=9606 GN=TRIOBP PE=1 SV=3	TRIOBP	0.900198	0.974425	0.789746	0.78968	1.17211	1	1.03086	0.915776	1.32868	2.86711	19.3206	0.893514	0.574502	0.065818	0.624216	0.824513	1	1.62553	0.472341	1.70027	2.75044	27.066	0.0249742	0.0249742	0.764762	0.728869	0.980983	1	0.654324	0.716667	1.07696	2.43467	12.4052
ySYYDESQGEIyR	Y12	Q9Y316	Protein MEMO1 OS=Homo sapiens OX=9606 GN=MEMO1 PE=1 SV=1	MEMO1	0.777387	0.735246	0.77162	0.755025	0.822465	1	0.849234	0.832692	0.946836	1.20462	3.11287	0.862864	0.784638	0.958456	1.00761	1.306	1	1.44678	1.17305	1.23441	1.17949	7.61498	0.999421	1.14433	1.45809	1.31727	1.55738	1	1.11003	1.29901	1.44105	2.91473	3.40554
yTEFyHVPTHSDASk	Y5; K15	Q96HC4	PDZ and LIM domain protein 5 OS=Homo sapiens OX=9606 GN=PDLIM5 PE=1 SV=5	PDLIM5	0.463307	0.460121	1.06839	1.07683	0.974323	1	0.865649	0.788483	0.779382	1.77932	4.60278	0.750796	0.930123	0.666604	1.29315	1.64764	1	0.926425	1.05702	1.48956	1.76461	8.02496	0.608873	0.35443	0.714965	1.11627	1.08436	1	0.805985	0.690135	0.831668	1.95857	3.01665
yVDSEGHLyTVPIR	Y9	Q03135	Caveolin-1 OS=Homo sapiens OX=9606 GN=CAV1 PE=1 SV=4	CAV1	0.74166	0.701657	0.941275	0.567597	0.933563	1	0.923169	1.15576	0.887124	2.98896	10.1265	0.0756768	0.182388	0.436653	0.398308	0.896932	1	0.644384	0.622754	1.48674	2.11836	20.9348	0.511505	0.465678	0.569894	0.528712	1.152	1	1.02322	1.08192	1.16444	2.4409	9.70591
yVLcPSTTPSPAQPADR	Y1; C4	P30530	Tyrosine-protein kinase receptor UFO OS=Homo sapiens OX=9606 GN=AXL PE=1 SV=4	AXL	1.71417	1.67842	1.46493	1.5239	1.49516	1	1.8035	1.41694	1.11366	1.25627	2.15683	1.37146	1.5698	1.29402	1.23858	1.45196	1	1.42109	1.04981	1.79619	1.46209	2.63146	1.10852	0.790911	1.21708	1.03194	0.95774	1	0.792417	1.16769	1.03033	1.08676	1.68984
yYEGYyAAGPGYGGR	Y2	Q93052	Lipoma-preferred partner OS=Homo sapiens OX=9606 GN=LPP PE=1 SV=1	LPP	0.541	0.542537	0.659415	0.609625	0.734135	1	1.12304	1.29119	1.12117	5.88294	8.1075	0.333324	0.432269	0.5819	0.410734	0.648811	1	0.766212	0.682807	1.61238	3.69594	11.0974	0.297261	0.144585	0.352647	0.639893	0.517824	1	1.02192	0.937672	0.881137	4.02329	6.54076
yYEGYyAAGPGYGGR	Y6	Q93052	Lipoma-preferred partner OS=Homo sapiens OX=9606 GN=LPP PE=1 SV=1	LPP	0.540229	0.464436	0.505034	0.524731	0.677373	1	1.0434	0.940206	0.983504	4.78554	7.47224	0.472258	0.53558	0.608911	0.584865	0.981337	1	0.923019	0.907856	2.03226	6.45918	13.6287	0.536596	0.331448	0.526937	0.614217	0.556311	1	0.893094	1.33675	1.23999	5.31963	7.77182
yYGyTGAFR	Y1	P02788	Lactotransferrin OS=Homo sapiens OX=9606 GN=LTF PE=1 SV=6	LTF	2.21508	1.19661	2.77988	1.85042	1.14437	1	2.11338	2.44518	2.54865	1.56998	2.11977	2.91584	2.11226	2.6854	1.809	3.2268	1	2.15005	2.43974	2.6962	0.736596	2.70256	3.53306	3.16134	3.81363	1.35169	1.60098	1	1.74592	1.79592	3.4372	3.9951	2.23712
yYGyTGAFR	Y4	P02788	Lactotransferrin OS=Homo sapiens OX=9606 GN=LTF PE=1 SV=6	LTF	3.22231	1.99836	3.60987	1.68384	0.952132	1	2.9008	3.22898	3.64682	1.55884	2.12262	4.16111	3.88736	4.42748	2.08477	2.33666	1	3.54969	4.30725	4.33661	1.17052	3.37979	5.26432	3.43973	4.74039	1.44816	2.06475	1	2.41876	2.78992	3.82169	2.04166	3.68406
