# Supplementary material for: Light-regulated allosteric switch enables temporal and subcellular control of enzyme activity
Source: eLife. 2020 Sep 23;9:e60647. doi: 10.7554/eLife.60647 (PMC7577742; doi:10.7554/eLife.60647)
Supplement: Figure 4—source data 1. [file elife-60647-fig4-data1.xlsx]

## Sheet: Sheet3
	1	2	3	4	5	6	7	8	9	10	14439.5	11828.8	11223.9	18112.2	13320.2	10421.2	13661.8	11538	12406.7	20896.8	Average	Stdee	Conf
10	14264	11503	11198	18076	13285	10325	13579	11482	12321	20840	0.987846	0.972457	0.997692	0.998001	0.997357	0.990769	0.993939	0.995146	0.993092	0.997282	0.992358	0.00774087	0.0040264				0
11	14389	11667	11140	18097	13319	10306	13596	11464	12267	20866	0.996503	0.986322	0.992525	0.999161	0.99991	0.988946	0.995184	0.993586	0.98874	0.998526	0.99394	0.00476324	0.00247759				1
12	14443	11782	11191	18193	13353	10357	13633	11530	12338	20883	1.00024	0.996044	0.997069	1.00446	1.00246	0.993839	0.997892	0.999307	0.994463	0.99934	0.998512	0.00336812	0.00175192				2
13	14387	11810	11280	18119	13310	10402	13605	11469	12315	20864	0.996364	0.998411	1.005	1.00038	0.999234	0.998158	0.995842	0.99402	0.992609	0.99843	0.997844	0.00347236	0.00180614				3
14	14431	11885	11248	18107	13338	10377	13678	11533	12428	20808	0.999411	1.00475	1.00215	0.999713	1.00134	0.995759	1.00119	0.999567	1.00172	0.995751	1.00013	0.00278503	0.00144863				4
15	14439	11889	11209	18095	13320	10369	13704	11518	12449	20880	0.999965	1.00509	0.998672	0.99905	0.999985	0.994991	1.00309	0.998267	1.00341	0.999196	1.00017	0.0029473	0.00153303				5
16	14487	11954	11248	18122	13314	10479	13697	11550	12394	20911	1.00329	1.01058	1.00215	1.00054	0.999535	1.00555	1.00258	1.00104	0.998976	1.00068	1.00249	0.00342998	0.0017841				6
17	14496	11888	11268	18053	13252	10577	13771	11580	12512	20950	1.00391	1.005	1.00393	0.996731	0.99488	1.01495	1.00799	1.00364	1.00849	1.00255	1.00421	0.00572356	0.0029771				7
18	14541	11963	11210	18076	13325	10512	13710	11636	12564	20977	1.00703	1.01135	0.998762	0.998001	1.00036	1.00871	1.00353	1.00849	1.01268	1.00384	1.00527	0.0051803	0.00269453				8
19	14518	11947	11247	18184	13386	10508	13645	11618	12479	20989	1.00544	1.00999	1.00206	1.00396	1.00494	1.00833	0.99877	1.00693	1.00583	1.00441	1.00507	0.00315287	0.00163996				9
20	14549	12028	11268	18113	13429	10514	13706	11646	12557	21062	1.00758	1.01684	1.00393	1.00004	1.00817	1.0089	1.00324	1.00936	1.01211	1.00791	1.00781	0.00471595	0.002453				10
21	14693	12075	11288	18069	13524	10577	13776	11703	12479	21146	1.01756	1.02081	1.00571	0.997615	1.0153	1.01495	1.00836	1.0143	1.00583	1.01193	1.01124	0.00687541	0.00357623				11
22	14929	12148	11296	18105	13642	10675	13813	11668	12484	21134	1.0339	1.02698	1.00642	0.999602	1.02416	1.02435	1.01107	1.01127	1.00623	1.01135	1.01553	0.0110536	0.00574951				12
23	14989	12218	11405	18184	13668	10851	13812	11720	12480	21276	1.03806	1.0329	1.01614	1.00396	1.02611	1.04124	1.01099	1.01577	1.00591	1.01815	1.02092	0.0131048	0.00681643				13
24	14982	12233	11417	18190	13703	10935	13779	11827	12553	21403	1.03757	1.03417	1.0172	1.0043	1.02874	1.0493	1.00858	1.02505	1.01179	1.02422	1.02409	0.0140344	0.00729997				14
25	15093	12223	11312	18173	13730	11016	13770	11845	12520	21509	1.04526	1.03333	1.00785	1.00336	1.03077	1.05708	1.00792	1.02661	1.00913	1.0293	1.02506	0.017854	0.00928674				15
26	15074	12364	11366	18177	13721	11106	13680	11868	12679	21574	1.04394	1.04525	1.01266	1.00358	1.03009	1.06571	1.00133	1.0286	1.02195	1.03241	1.02855	0.0199288	0.0103659				16
27	15211	12336	11446	18237	13754	11105	13727	11917	12661	21512	1.05343	1.04288	1.01979	1.00689	1.03257	1.06562	1.00477	1.03285	1.0205	1.02944	1.03087	0.0193098	0.0100439				17
28	15366	12430	11484	18324	13712	11180	13729	11973	12696	21602	1.06416	1.05083	1.02317	1.01169	1.02941	1.07281	1.00492	1.0377	1.02332	1.03375	1.03518	0.0218453	0.0113628				18
29	15355	12531	11584	18270	13718	11102	13795	11993	12761	21664	1.0634	1.05936	1.03208	1.00871	1.02986	1.06533	1.00975	1.03943	1.02856	1.03671	1.03732	0.020259	0.0105377				19
30	15389	12594	11548	18402	13708	11095	13874	11978	12745	21685	1.06576	1.06469	1.02888	1.016	1.02911	1.06466	1.01553	1.03813	1.02727	1.03772	1.03877	0.0195893	0.0101893				20
31	15455	12653	11674	18394	13737	11193	13932	11953	12753	21692	1.07033	1.06968	1.0401	1.01556	1.03129	1.07406	1.01978	1.03597	1.02791	1.03805	1.04227	0.0214925	0.0111793				21
32	15588	12670	11818	18481	13795	11200	13972	11998	12799	21712	1.07954	1.07111	1.05293	1.02036	1.03565	1.07473	1.02271	1.03987	1.03162	1.03901	1.04675	0.0216639	0.0112684				22
33	15653	12721	11906	18505	13839	11268	14051	11973	12855	21754	1.08404	1.07543	1.06077	1.02169	1.03895	1.08126	1.02849	1.0377	1.03613	1.04102	1.05055	0.0228667	0.0118941				23
34	15745	12685	11953	18586	13843	11402	14114	12005	12966	21809	1.09041	1.07238	1.06496	1.02616	1.03925	1.09412	1.0331	1.04047	1.04508	1.04365	1.05496	0.0239978	0.0124824				24
35	15766	12782	11945	18658	13963	11455	14140	12075	13031	21874	1.09187	1.08058	1.06425	1.03013	1.04826	1.0992	1.035	1.04654	1.05032	1.04676	1.05929	0.0237899	0.0123743				25
36	15915	12842	12059	18607	13954	11570	14170	12075	13022	21948	1.10218	1.08566	1.0744	1.02732	1.04758	1.11024	1.0372	1.04654	1.04959	1.0503	1.0631	0.028281	0.0147103				26
37	15959	12905	12136	18635	13960	11671	14279	12099	13152	22143	1.10523	1.09098	1.08126	1.02886	1.04803	1.11993	1.04518	1.04862	1.06007	1.05964	1.06878	0.0293263	0.015254				27
38	16035	12921	12176	18651	13983	11811	14285	12199	13267	22301	1.1105	1.09233	1.08483	1.02975	1.04976	1.13336	1.04562	1.05729	1.06934	1.0672	1.074	0.0316368	0.0164558				28
39	16087	13004	12220	18763	14067	11902	14406	12242	13275	22413	1.1141	1.09935	1.08875	1.03593	1.05607	1.14209	1.05447	1.06102	1.06999	1.07256	1.07943	0.031883	0.0165839				29
40	16110	13072	12229	18734	14054	12035	14366	12277	13425	22571	1.11569	1.1051	1.08955	1.03433	1.05509	1.15486	1.05155	1.06405	1.08208	1.08012	1.08324	0.035384	0.0184049				30
41	16091	13156	12342	18878	14046	12308	14454	12355	13516	22734	1.11437	1.1122	1.09962	1.04228	1.05449	1.18105	1.05799	1.07081	1.08941	1.08792	1.09101	0.0399944	0.020803				31
42	16178	13237	12479	19052	14055	12508	14459	12430	13446	22772	1.1204	1.11905	1.11182	1.05189	1.05516	1.20025	1.05835	1.07731	1.08377	1.08974	1.09677	0.044481	0.0231367				32
43	16317	13282	12425	19100	14082	12731	14608	12476	13540	22898	1.13003	1.12285	1.10701	1.05454	1.05719	1.22164	1.06926	1.0813	1.09135	1.09577	1.10309	0.0488327	0.0254002				33
44	16367	13310	12424	19289	14080	12990	14658	12516	13572	23120	1.13349	1.12522	1.10692	1.06497	1.05704	1.2465	1.07292	1.08476	1.09393	1.10639	1.10921	0.0542972	0.0282426				34
45	16429	13371	12529	19382	14098	13183	14737	12592	13700	23243	1.13778	1.13038	1.11628	1.07011	1.05839	1.26502	1.0787	1.09135	1.10424	1.11228	1.11645	0.058177	0.0302607				35
46	16425	13485	12622	19377	14162	13402	14743	12682	13675	23490	1.1375	1.14001	1.12456	1.06983	1.0632	1.28603	1.07914	1.09915	1.10223	1.1241	1.12258	0.0636034	0.0330832				36
47	16520	13575	12602	19493	14185	13500	14814	12719	13828	23664	1.14408	1.14762	1.12278	1.07624	1.06492	1.29544	1.08434	1.10236	1.11456	1.13242	1.12848	0.0650862	0.0338545				37
48	16628	13667	12712	19551	14264	13685	14899	12770	13915	23747	1.15156	1.1554	1.13258	1.07944	1.07085	1.31319	1.09056	1.10678	1.12157	1.13639	1.13583	0.068796	0.0357842				38
49	16692	13711	12861	19573	14384	13765	14902	12871	13962	23812	1.156	1.15912	1.14586	1.08065	1.07986	1.32087	1.09078	1.11553	1.12536	1.1395	1.14135	0.0697011	0.0362549				39
50	16797	13764	12983	19676	14475	13853	14992	12985	13995	23943	1.16327	1.1636	1.15673	1.08634	1.0867	1.32931	1.09737	1.12541	1.12802	1.14577	1.14825	0.070288	0.0365602				40
51	16833	13865	12934	19600	14492	14030	14953	12990	14144	23928	1.16576	1.17214	1.15236	1.08214	1.08797	1.34629	1.09451	1.12585	1.14003	1.14506	1.15121	0.0756447	0.0393465				41
52	16853	13923	13035	19655	14527	14016	14876	12983	14150	24112	1.16715	1.17704	1.16136	1.08518	1.0906	1.34495	1.08888	1.12524	1.14051	1.15386	1.15348	0.0754421	0.0392411				42
53	16802	13945	13014	19623	14599	13994	14874	13046	14150	24240	1.16361	1.1789	1.15949	1.08341	1.096	1.34284	1.08873	1.1307	1.14051	1.15999	1.15442	0.0743627	0.0386796				43
54	16813	13929	12970	19702	14575	13957	14812	13025	14174	24447	1.16438	1.17755	1.15557	1.08778	1.0942	1.33929	1.08419	1.12888	1.14245	1.16989	1.15442	0.0736711	0.0383199				44
55	16786	13834	12943	19498	14599	13916	14833	12990	14238	24479	1.16251	1.16952	1.15316	1.07651	1.096	1.33535	1.08573	1.12585	1.14761	1.17142	1.15237	0.07329	0.0381217				45
56	16713	13798	12911	19620	14658	13997	14835	12974	14228	24497	1.15745	1.16648	1.15031	1.08325	1.10043	1.34313	1.08587	1.12446	1.1468	1.17228	1.15305	0.0743239	0.0386595				46
57	16654	13752	12851	19662	14757	13958	14728	12943	14203	24507	1.15336	1.16259	1.14497	1.08557	1.10787	1.33939	1.07804	1.12177	1.14478	1.17276	1.15111	0.0734064	0.0381822				47
58	16575	13735	12782	19717	14767	14041	14804	12908	14257	24441	1.14789	1.16115	1.13882	1.0886	1.10862	1.34735	1.08361	1.11874	1.14914	1.1696	1.15135	0.0748592	0.0389379				48
59	16505	13769	12800	19731	14823	14069	14838	12923	14207	24346	1.14305	1.16402	1.14042	1.08938	1.11282	1.35004	1.08609	1.12004	1.14511	1.16506	1.1516	0.074993	0.0390075				49
60	16468	13674	12835	19645	14854	14123	14817	12869	14253	24409	1.14048	1.15599	1.14354	1.08463	1.11515	1.35522	1.08456	1.11536	1.14881	1.16807	1.15118	0.0771491	0.040129				50
61	16461	13671	12794	19520	14905	14199	14880	12900	14165	24432	1.14	1.15574	1.13989	1.07773	1.11898	1.36251	1.08917	1.11804	1.14172	1.16917	1.15129	0.0793887	0.0412939				51
62	16431	13711	12803	19554	14956	14238	14963	12875	14129	24475	1.13792	1.15912	1.14069	1.0796	1.12281	1.36625	1.09524	1.11588	1.13882	1.17123	1.15276	0.079888	0.0415536				52
63	16404	13720	12834	19594	15018	14276	14979	12788	14099	24549	1.13605	1.15988	1.14345	1.08181	1.12746	1.3699	1.09641	1.10834	1.1364	1.17477	1.15345	0.0810593	0.0421628				53
64	16317	13734	12768	19618	15120	14240	15026	12773	14112	24436	1.13003	1.16106	1.13757	1.08314	1.13512	1.36645	1.09986	1.10704	1.13745	1.16937	1.15271	0.0796074	0.0414077				54
65	16289	13757	12648	19673	15231	14266	15035	12751	14110	24451	1.12809	1.16301	1.12688	1.08617	1.14345	1.36894	1.10051	1.10513	1.13729	1.17008	1.15296	0.0803984	0.0418191				55
66	16269	13754	12574	19626	15321	14290	14951	12723	14051	24383	1.1267	1.16276	1.12029	1.08358	1.15021	1.37124	1.09437	1.1027	1.13253	1.16683	1.15112	0.0822304	0.042772				56
67	16263	13783	12538	19685	15330	14293	14945	12749	13977	24373	1.12629	1.16521	1.11708	1.08684	1.15088	1.37153	1.09393	1.10496	1.12657	1.16635	1.15096	0.0822759	0.0427957				57
68	16214	13805	12551	19742	15423	14288	14924	12771	13953	24403	1.12289	1.16707	1.11824	1.08998	1.15787	1.37105	1.09239	1.10686	1.12463	1.16779	1.15188	0.082102	0.0427052				58
69	16154	13845	12494	19677	15550	14278	14955	12790	13909	24294	1.11874	1.17045	1.11316	1.08639	1.1674	1.37009	1.09466	1.10851	1.12109	1.16257	1.15131	0.0825311	0.0429284				59
70	16213	13862	12317	19532	15623	14290	14946	12810	13914	24328	1.12282	1.17189	1.09739	1.07839	1.17288	1.37124	1.094	1.11024	1.12149	1.1642	1.15045	0.0845343	0.0439704				60
71	16205	13891	12325	19594	15714	14287	14988	12787	13813	24473	1.12227	1.17434	1.0981	1.08181	1.17971	1.37096	1.09707	1.10825	1.11335	1.17114	1.1517	0.0847962	0.0441066				61
72	16272	13959	12401	19582	15777	14305	15041	12800	13786	24512	1.12691	1.18009	1.10487	1.08115	1.18444	1.37268	1.10095	1.10938	1.11117	1.173	1.15447	0.0849064	0.0441639				62
73	16411	13974	12374	19586	15841	14328	14983	12810	13774	24511	1.13654	1.18135	1.10247	1.08137	1.18925	1.37489	1.09671	1.11024	1.11021	1.17295	1.1556	0.0859372	0.0447001				63
74	16513	14039	12298	19662	15894	14414	14953	12791	13824	24601	1.1436	1.18685	1.0957	1.08557	1.19323	1.38314	1.09451	1.1086	1.11424	1.17726	1.15827	0.0887283	0.0461519				64
75	16539	14080	12438	19716	15983	14493	14979	12780	13867	24707	1.1454	1.19032	1.10817	1.08855	1.19991	1.39072	1.09641	1.10764	1.1177	1.18233	1.16272	0.0899059	0.0467644				65
76	16753	14155	12490	19666	16023	14562	15022	12836	13818	24816	1.16022	1.19666	1.1128	1.08579	1.20291	1.39734	1.09956	1.1125	1.11375	1.18755	1.16691	0.0916404	0.0476666				66
77	16785	14236	12383	19703	16096	14642	14996	12836	13828	24841	1.16244	1.2035	1.10327	1.08783	1.20839	1.40502	1.09766	1.1125	1.11456	1.18875	1.16839	0.0948869	0.0493553				67
78	16901	14304	12378	19756	16188	14719	15004	12816	13785	24979	1.17047	1.20925	1.10283	1.09076	1.2153	1.41241	1.09824	1.11076	1.11109	1.19535	1.17165	0.0976901	0.0508134				68
79	16998	14361	12415	19745	16214	14774	15039	12882	13809	25051	1.17719	1.21407	1.10612	1.09015	1.21725	1.41769	1.10081	1.11648	1.11303	1.1988	1.17516	0.0985971	0.0512851				69
80	16972	14420	12462	19753	16255	14805	15099	12922	13810	25034	1.17539	1.21906	1.11031	1.09059	1.22033	1.42066	1.1052	1.11995	1.11311	1.19798	1.17726	0.0988072	0.0513944				70
81	16898	14418	12547	19738	16241	14800	15175	12915	13877	25188	1.17026	1.21889	1.11788	1.08976	1.21928	1.42018	1.11076	1.11934	1.11851	1.20535	1.17902	0.0975967	0.0507647				71
82	16995	14471	12645	19764	16322	14783	15229	12983	13913	25272	1.17698	1.22337	1.12661	1.0912	1.22536	1.41855	1.11471	1.12524	1.12141	1.20937	1.18328	0.0960547	0.0499627				72
83	17114	14497	12680	19845	16418	14800	15225	13019	14048	25426	1.18522	1.22557	1.12973	1.09567	1.23256	1.42018	1.11442	1.12836	1.13229	1.21674	1.18808	0.09553	0.0496898				73
84	17207	14470	12631	19843	16463	14873	15179	13050	14135	25452	1.19166	1.22329	1.12537	1.09556	1.23594	1.42719	1.11105	1.13105	1.1393	1.21799	1.18984	0.0975458	0.0507383				74
85	17239	14472	12692	19785	16615	14905	15165	13050	14111	25510	1.19388	1.22345	1.1308	1.09236	1.24735	1.43026	1.11003	1.13105	1.13737	1.22076	1.19173	0.0992993	0.0516504				75
86	17345	14527	12728	19833	16753	15023	15232	13094	14265	25585	1.20122	1.2281	1.13401	1.09501	1.25771	1.44158	1.11493	1.13486	1.14978	1.22435	1.19816	0.101337	0.0527101				76
87	17372	14604	12738	19842	16786	15177	15291	13132	14261	25711	1.20309	1.23461	1.1349	1.0955	1.26019	1.45636	1.11925	1.13815	1.14946	1.23038	1.20219	0.105136	0.0546863				77
88	17482	14656	12838	19872	16912	15225	15266	13171	14418	25778	1.21071	1.23901	1.14381	1.09716	1.26965	1.46096	1.11742	1.14153	1.16211	1.23359	1.2076	0.105697	0.0549782				78
89	17575	14696	12836	19791	16950	15321	15239	13216	14512	25945	1.21715	1.24239	1.14363	1.09269	1.2725	1.47018	1.11545	1.14543	1.16969	1.24158	1.21107	0.108825	0.056605				79
90	17642	14767	12759	19787	17065	15371	15263	13314	14566	26117	1.22179	1.24839	1.13677	1.09247	1.28114	1.47497	1.1172	1.15393	1.17404	1.24981	1.21505	0.110775	0.0576192				80
91	17769	14814	12764	19790	17087	15377	15292	13259	14612	26129	1.23058	1.25237	1.13722	1.09263	1.28279	1.47555	1.11933	1.14916	1.17775	1.25038	1.21678	0.111176	0.057828				81
92	17785	14827	12654	19896	17134	15443	15368	13345	14766	26315	1.23169	1.25347	1.12742	1.09849	1.28632	1.48188	1.12489	1.15661	1.19016	1.25928	1.22102	0.112082	0.0582994				82
93	17853	14857	12662	19876	17160	15536	15417	13388	14801	26324	1.2364	1.256	1.12813	1.09738	1.28827	1.49081	1.12848	1.16034	1.19298	1.25971	1.22385	0.114082	0.0593397				83
94	17912	14825	12704	19955	17201	15575	15399	13428	14858	26593	1.24049	1.2533	1.13187	1.10174	1.29135	1.49455	1.12716	1.16381	1.19758	1.27259	1.22744	0.11462	0.0596193				84
95	17961	14875	12786	19886	17278	15673	15369	13493	14886	26804	1.24388	1.25752	1.13918	1.09793	1.29713	1.50395	1.12496	1.16944	1.19984	1.28268	1.23165	0.117642	0.0611911				85
96	18113	14839	12856	20031	17311	15762	15398	13506	14882	26867	1.25441	1.25448	1.14541	1.10594	1.29961	1.51249	1.12708	1.17057	1.19951	1.2857	1.23552	0.118434	0.0616033				86
97	18183	14887	12861	20001	17377	15794	15339	13580	15046	26859	1.25925	1.25854	1.14586	1.10428	1.30456	1.51556	1.12277	1.17698	1.21273	1.28532	1.23859	0.119533	0.0621747				87
98	18186	14895	12928	20057	17371	15880	15388	13624	15063	26967	1.25946	1.25921	1.15183	1.10738	1.30411	1.52382	1.12635	1.18079	1.2141	1.29048	1.24175	0.120362	0.0626062				88
99	18277	14910	13017	20068	17400	15824	15430	13643	15118	27131	1.26576	1.26048	1.15976	1.10798	1.30629	1.51844	1.12943	1.18244	1.21854	1.29833	1.24475	0.118347	0.0615578				89
100	18314	14972	13002	20077	17408	15905	15455	13675	15173	27280	1.26833	1.26572	1.15842	1.10848	1.30689	1.52622	1.13126	1.18521	1.22297	1.30546	1.2479	0.120457	0.0626555				90
101	18366	14985	13120	20097	17351	15948	15480	13675	15216	27293	1.27193	1.26682	1.16893	1.10958	1.30261	1.53034	1.13309	1.18521	1.22643	1.30609	1.2501	0.120175	0.0625088				91
102	18351	15019	13147	20065	17402	15948	15481	13750	15222	27355	1.27089	1.2697	1.17134	1.10782	1.30644	1.53034	1.13316	1.19171	1.22692	1.30905	1.25174	0.120205	0.0625245				92
103	18281	15050	13191	20106	17507	15852	15501	13723	15143	27474	1.26604	1.27232	1.17526	1.11008	1.31432	1.52113	1.13462	1.18937	1.22055	1.31475	1.25184	0.118124	0.0614421				93
104	18265	14991	13252	20002	17541	15842	15432	13687	15131	27590	1.26493	1.26733	1.18069	1.10434	1.31687	1.52017	1.12957	1.18625	1.21958	1.3203	1.251	0.119458	0.0621356				94
105	18189	14919	13221	19986	17564	15870	15469	13713	15072	27624	1.25967	1.26124	1.17793	1.10346	1.3186	1.52286	1.13228	1.18851	1.21483	1.32192	1.25013	0.120229	0.0625369				95
106	18102	14885	13109	19982	17581	15843	15441	13669	15110	27498	1.25364	1.25837	1.16795	1.10323	1.31988	1.52027	1.13023	1.18469	1.21789	1.3159	1.24721	0.120271	0.0625587				96
107	18035	14755	13085	20083	17614	15849	15447	13657	15026	27500	1.249	1.24738	1.16582	1.10881	1.32235	1.52084	1.13067	1.18365	1.21112	1.31599	1.24556	0.120153	0.0624974				97
108	17922	14664	13030	19987	17644	15904	15462	13728	14984	27527	1.24118	1.23969	1.16092	1.10351	1.3246	1.52612	1.13177	1.18981	1.20773	1.31728	1.24426	0.122462	0.0636986				98
109	17844	14596	13134	20024	17600	15917	15443	13678	14948	27505	1.23578	1.23394	1.17018	1.10555	1.3213	1.52737	1.13038	1.18547	1.20483	1.31623	1.2431	0.122082	0.0635009				99
110	17739	14478	13109	19967	17672	15981	15440	13594	14881	27455	1.22851	1.22396	1.16795	1.10241	1.32671	1.53351	1.13016	1.17819	1.19943	1.31384	1.24047	0.125237	0.0651417				100
111	17698	14400	13126	19966	17747	15939	15405	13574	14872	27458	1.22567	1.21737	1.16947	1.10235	1.33234	1.52948	1.1276	1.17646	1.19871	1.31398	1.23934	0.125082	0.0650611				101
112	17641	14330	13056	20021	17808	15924	15434	13542	14811	27386	1.22172	1.21145	1.16323	1.10539	1.33692	1.52804	1.12972	1.17369	1.19379	1.31054	1.23745	0.125223	0.0651345				102
113	17551	14197	13013	20006	17911	15915	15391	13499	14838	27357	1.21549	1.20021	1.1594	1.10456	1.34465	1.52718	1.12657	1.16996	1.19597	1.30915	1.23531	0.126806	0.065958				103
114	17513	14155	12984	20037	17983	15875	15422	13503	14750	27269	1.21285	1.19666	1.15682	1.10627	1.35005	1.52334	1.12884	1.17031	1.18887	1.30494	1.23389	0.126263	0.0656757				104
115	17475	14096	12903	20051	18038	15818	15497	13397	14685	27176	1.21022	1.19167	1.1496	1.10704	1.35418	1.51787	1.13433	1.16112	1.18363	1.30049	1.23102	0.125935	0.065505				105
116	17480	14109	12880	19984	18081	15783	15480	13330	14606	27203	1.21057	1.19277	1.14755	1.10334	1.35741	1.51451	1.13309	1.15531	1.17727	1.30178	1.22936	0.12679	0.0659497				106
117	17398	14132	12742	20029	18037	15771	15485	13314	14540	27191	1.20489	1.19471	1.13526	1.10583	1.35411	1.51336	1.13345	1.15393	1.17195	1.3012	1.22687	0.127111	0.0661168				107
118	17386	14066	12638	20029	18041	15686	15444	13314	14544	27121	1.20406	1.18913	1.12599	1.10583	1.35441	1.5052	1.13045	1.15393	1.17227	1.29785	1.22391	0.126076	0.0655782				108
119	17344	14081	12512	20040	18031	15667	15450	13326	14490	27141	1.20115	1.1904	1.11476	1.10644	1.35366	1.50338	1.13089	1.15497	1.16792	1.29881	1.22224	0.126673	0.0658886				109
120	17374	14026	12442	19965	18023	15629	15467	13224	14485	27186	1.20323	1.18575	1.10853	1.1023	1.35306	1.49973	1.13213	1.14613	1.16751	1.30096	1.21993	0.127443	0.0662895				110
