# Supplementary material for: Light-regulated allosteric switch enables temporal and subcellular control of enzyme activity
Source: eLife. 2020 Sep 23;9:e60647. doi: 10.7554/eLife.60647 (PMC7577742; doi:10.7554/eLife.60647)
Supplement: Figure 4—source data 2. [file elife-60647-fig4-data2.xlsx]

## Sheet: Sheet1
	masked2	masked3	masked4	masked4	masked3	masked2	masked4	masked3	masked2	21206.4	18556.8	14438.1	15609.5	26540.2	26468.9	18386.3	20472.5	19656.7	Aver	stdev	conf
0	14798	27073	25761	17425	20009	19539	19599	18174	13714	0.924203	0.979371	0.94985	0.948011	1.02008	0.973255	0.947718	0.977358	0.994011	0.968206	0.0289202	0.0158565
1	14805	27033	25987	17763	20052	19511	19677	18128	13855	0.927882	0.976893	0.959616	0.948459	1.01857	0.981794	0.966101	0.979459	0.992586	0.972373	0.0261137	0.0143177
2	14795	27012	26075	17919	20011	19445	19705	18107	14005	0.929202	0.975761	0.970005	0.947818	1.01778	0.985118	0.974586	0.977456	0.989229	0.974106	0.0249888	0.013701
3	14849	26952	26131	18078	20002	19505	19846	18205	14027	0.935851	0.981042	0.971529	0.951278	1.01552	0.987234	0.983234	0.977017	0.992281	0.97722	0.0230795	0.0126541
4	14951	26862	26194	18182	20038	19467	19977	18250	14047	0.942028	0.983467	0.972914	0.957812	1.01213	0.989614	0.98889	0.978775	0.990348	0.979553	0.0203305	0.0111469
5	14973	26724	26313	18330	20096	19476	20098	18384	14349	0.947734	0.990688	0.993831	0.959222	1.00693	0.99411	0.99694	0.981608	0.990806	0.984651	0.0190853	0.0104642
6	14838	26602	26488	18463	20124	19471	20316	18470	14466	0.958014	0.995322	1.00193	0.950573	1.00233	1.00072	1.00417	0.982976	0.990551	0.987399	0.0200154	0.0109742
7	14861	26629	26588	18471	20177	19465	20285	18498	14585	0.956552	0.996831	1.01018	0.952047	1.00335	1.0045	1.00461	0.985565	0.990246	0.989319	0.0213023	0.0116797
8	14953	26607	26678	18545	20423	19466	20411	18502	14490	0.962494	0.997047	1.0036	0.95794	1.00252	1.0079	1.00863	0.997581	0.990297	0.992001	0.0189233	0.0103754
9	15149	26534	26687	18454	20531	19556	20618	18532	14664	0.972255	0.998664	1.01565	0.970497	0.999766	1.00824	1.00368	1.00286	0.994876	0.996276	0.0153216	0.00840058
10	15245	26610	26770	18521	20597	19518	20780	18496	14712	0.979894	0.996724	1.01897	0.976647	1.00263	1.01138	1.00733	1.00608	0.992942	0.999177	0.0141023	0.00773208
11	15414	26589	26847	18506	20589	19469	20936	18530	14751	0.987251	0.998556	1.02167	0.987474	1.00184	1.01428	1.00651	1.00569	0.99045	1.00153	0.0119571	0.00655589
12	15530	26626	26886	18406	20555	19495	21142	18595	14745	0.996965	1.00206	1.02126	0.994905	1.00323	1.01576	1.00107	1.00403	0.991772	1.00345	0.00953967	0.00523045
13	15620	26637	26872	18268	20647	19548	21285	18677	14766	1.00371	1.00648	1.02271	1.00067	1.00365	1.01523	0.993567	1.00852	0.994469	1.00544	0.00932098	0.00511055
14	15853	26604	26841	18343	20631	19546	21315	18714	14835	1.00512	1.00847	1.02749	1.0156	1.0024	1.01406	0.997647	1.00774	0.994367	1.0081	0.010045	0.00550749
15	16067	26567	26820	18541	20563	19589	21353	18733	14849	1.00691	1.0095	1.02846	1.02931	1.00101	1.01326	1.00842	1.00442	0.996554	1.01087	0.0113052	0.00619847
16	16194	26539	26801	18564	20438	19530	21596	18740	14896	1.01837	1.00987	1.03172	1.03744	0.999955	1.01255	1.00967	0.998313	0.993553	1.01238	0.0148256	0.00812866
17	16292	26502	26732	18525	20363	19580	21675	18769	14826	1.0221	1.01144	1.02687	1.04372	0.998561	1.00994	1.00755	0.99465	0.996097	1.01232	0.0161529	0.00885637
18	16304	26476	26655	18456	20472	19594	21790	18808	14835	1.02752	1.01354	1.02749	1.04449	0.997581	1.00703	1.00379	0.999974	0.996809	1.01314	0.016593	0.00909768
19	16207	26487	26642	18522	20649	19608	21901	18809	14663	1.03276	1.01359	1.01558	1.03828	0.997995	1.00654	1.00738	1.00862	0.997521	1.01314	0.0141121	0.00773743
20	16045	26333	26615	18566	20802	19660	21904	18807	14495	1.0329	1.01348	1.00394	1.0279	0.992193	1.00552	1.00978	1.01609	1.00017	1.01133	0.0129834	0.00711861
21	16023	26340	26574	18617	20893	19739	21988	18768	14448	1.03686	1.01138	1.00069	1.02649	0.992457	1.00397	1.01255	1.02054	1.00419	1.01212	0.0138597	0.00759908
22	15948	26190	26483	18530	20919	19779	21965	18727	14374	1.03577	1.00917	0.995562	1.02168	0.986805	1.00053	1.00782	1.02181	1.00622	1.00949	0.0149736	0.00820979
23	15930	26236	26417	18478	20810	19860	22089	18739	14309	1.04162	1.00982	0.99106	1.02053	0.988538	0.998039	1.00499	1.01648	1.01034	1.00905	0.0163259	0.00895124
24	16024	26252	26306	18345	20719	19923	22106	18692	14227	1.04242	1.00729	0.985381	1.02655	0.989141	0.993846	0.997755	1.01204	1.01355	1.00755	0.0185319	0.0101608
25	16063	26179	26262	18450	20602	19965	22245	18673	14282	1.04898	1.00626	0.98919	1.02905	0.98639	0.992183	1.00347	1.00632	1.01568	1.00861	0.0202337	0.0110938
26	16163	26269	26188	18431	20528	20116	22312	18577	14299	1.05214	1.00109	0.990368	1.03546	0.989782	0.989388	1.00243	1.00271	1.02336	1.00964	0.0223883	0.0122752
27	16154	26248	26165	18594	20499	20116	22365	18562	14235	1.05464	1.00028	0.985935	1.03488	0.98899	0.988519	1.0113	1.00129	1.02336	1.00991	0.0235688	0.0129224
28	16079	26249	26142	18661	20632	20077	22451	18530	14187	1.05869	0.998556	0.982611	1.03008	0.989028	0.98765	1.01494	1.00779	1.02138	1.01008	0.0243751	0.0133645
29	16159	26245	26147	18634	20805	20089	22461	18508	14206	1.05916	0.99737	0.983927	1.0352	0.988877	0.987839	1.01347	1.01624	1.02199	1.01156	0.0250037	0.0137091
30	16130	26275	26141	18867	20963	20099	22465	18530	14224	1.05935	0.998556	0.985173	1.03334	0.990008	0.987612	1.02615	1.02396	1.0225	1.01407	0.0252271	0.0138316
31	16126	26201	26102	18839	20934	20134	22421	18395	14277	1.05728	0.991281	0.988844	1.03309	0.987219	0.986138	1.02462	1.02254	1.02428	1.01281	0.0253928	0.0139225
32	16360	26257	26121	18759	20907	20153	22399	18304	14200	1.05624	0.986377	0.983511	1.04808	0.989329	0.986856	1.02027	1.02122	1.02525	1.01301	0.0278225	0.0152546
33	16354	26153	26168	18463	20894	20198	22453	18144	14145	1.05879	0.977755	0.979702	1.04769	0.985411	0.988632	1.00417	1.02059	1.02754	1.01003	0.0301524	0.0165321
34	16167	26131	26169	18437	20850	20157	22470	17907	14122	1.05959	0.964983	0.978109	1.03571	0.984582	0.98867	1.00276	1.01844	1.02545	1.00648	0.0306499	0.0168049
35	15976	26054	26126	18436	20679	20135	22515	17658	14112	1.06171	0.951565	0.977416	1.02348	0.981681	0.987045	1.0027	1.01009	1.02433	1.00222	0.0323558	0.0177402
36	15762	25942	26036	18467	20634	20092	22505	17424	14073	1.06124	0.938955	0.974715	1.00977	0.977461	0.983645	1.00439	1.00789	1.02214	0.9978	0.0344875	0.018909
37	15616	25828	26011	18508	20535	19969	22430	16994	14034	1.0577	0.915783	0.972014	1.00041	0.973165	0.9827	1.00662	1.00305	1.01589	0.991926	0.0386387	0.021185
38	15564	25662	25987	18390	20409	19965	22435	16545	14036	1.05794	0.891587	0.972152	0.997083	0.966911	0.981794	1.0002	0.996897	1.01568	0.986694	0.0446971	0.0245067
39	15555	25698	25870	18456	20366	19922	22476	16076	13989	1.05987	0.866313	0.968897	0.996507	0.968267	0.977373	1.00379	0.994796	1.0135	0.983257	0.0520285	0.0285264
40	15430	25742	25761	18517	20199	19996	22470	15761	13960	1.05959	0.849338	0.966888	0.988499	0.969925	0.973255	1.00711	0.986639	1.01726	0.979834	0.0569702	0.0312359
41	15404	25574	25676	18481	20099	20012	22459	15651	14031	1.05907	0.843411	0.971806	0.986833	0.963595	0.970044	1.00515	0.981755	1.01807	0.977749	0.0585559	0.0321053
42	15215	25697	25664	18489	19956	20023	22552	15524	14058	1.06345	0.836567	0.973676	0.974725	0.968229	0.969591	1.00559	0.97477	1.01863	0.976137	0.0611276	0.0335153
43	15155	25627	25680	18441	19864	19995	22620	15398	14057	1.06666	0.829777	0.973607	0.970881	0.965592	0.970195	1.00298	0.970276	1.01721	0.97413	0.0634446	0.0347857
44	15131	25484	25733	18463	19841	20012	22660	15289	14087	1.06855	0.823903	0.975684	0.969344	0.960204	0.972198	1.00417	0.969152	1.01807	0.973475	0.065727	0.0360371
45	15116	25385	25825	18525	19778	19925	22595	15104	14064	1.06548	0.813933	0.974091	0.968383	0.956474	0.975673	1.00755	0.966075	1.01365	0.971256	0.0680294	0.0372995
46	14904	25246	25809	18478	19743	19807	22588	14882	14062	1.06515	0.80197	0.973953	0.954801	0.951236	0.975069	1.00499	0.964365	1.00764	0.966576	0.0711335	0.0390014
47	14736	25161	25755	18334	19717	19647	22702	14760	14115	1.07053	0.795396	0.977624	0.944039	0.948034	0.973029	0.997157	0.963095	0.999505	0.963156	0.0733573	0.0402207
48	14619	25133	25675	18141	19692	19558	22747	14625	14142	1.07265	0.788121	0.979494	0.936543	0.946979	0.970006	0.98666	0.961874	0.994977	0.9597	0.075307	0.0412897
49	14605	25255	25698	18031	19772	19473	22764	14508	14121	1.07345	0.781816	0.978039	0.935646	0.951575	0.970875	0.980677	0.965782	0.990653	0.958724	0.0767418	0.0420763
50	14689	25231	25756	18072	19715	19449	22795	14305	14081	1.07491	0.770876	0.975269	0.941028	0.950671	0.973067	0.982907	0.962998	0.989432	0.957907	0.0799876	0.0438559
51	14710	25135	25810	17992	19665	19422	22787	14128	14088	1.07454	0.761338	0.975754	0.942373	0.947054	0.975107	0.978556	0.960555	0.988059	0.955926	0.0825547	0.0452634
52	14818	25161	25817	17781	19654	19318	22751	14101	14131	1.07284	0.759883	0.978732	0.949292	0.948034	0.975371	0.96708	0.960018	0.982768	0.954891	0.0821262	0.0450285
53	14800	25236	25877	17546	19639	19263	22682	14071	14151	1.06958	0.758267	0.980117	0.948139	0.950859	0.977638	0.954299	0.959285	0.97997	0.953129	0.0818932	0.0449008
54	14867	25216	25834	17277	19688	19195	22674	14031	14144	1.06921	0.756111	0.979632	0.952431	0.950106	0.976013	0.939669	0.961679	0.97651	0.951262	0.0823829	0.0451693
55	14812	25128	25804	17148	19665	19188	22697	14068	14091	1.07029	0.758105	0.975961	0.948907	0.94679	0.97488	0.932652	0.960555	0.976154	0.949366	0.0819231	0.0449172
56	14744	25242	25792	17139	19558	19086	22693	14031	14117	1.0701	0.756111	0.977762	0.944551	0.951086	0.974427	0.932163	0.955329	0.970965	0.948055	0.0822861	0.0451162
57	14681	25302	25743	17067	19490	18981	22700	13986	14182	1.07043	0.753686	0.982264	0.940515	0.953346	0.972575	0.928247	0.952007	0.965623	0.946522	0.0831471	0.0455883
58	14628	25315	25708	16918	19289	18829	22714	13854	14131	1.07109	0.746573	0.978732	0.93712	0.953836	0.971253	0.920143	0.942189	0.957891	0.942092	0.0851146	0.046667
59	14638	25240	25745	16753	19087	18801	22637	13883	14089	1.06746	0.748135	0.975823	0.93776	0.95101	0.972651	0.911169	0.932322	0.956466	0.9392	0.0841797	0.0461544
60	14613	25116	25745	16602	19025	18662	22645	13852	14096	1.06784	0.746465	0.976308	0.936159	0.946338	0.972651	0.902956	0.929294	0.949395	0.936378	0.0849228	0.0465619
61	14401	25163	25724	16504	18865	18685	22669	13826	14022	1.06897	0.745064	0.971182	0.922577	0.948109	0.971858	0.897626	0.921479	0.950565	0.933048	0.0857361	0.0470078
62	14394	25186	25702	16439	18895	18537	22733	13831	13986	1.07199	0.745333	0.968689	0.922129	0.948976	0.971026	0.894091	0.922944	0.943036	0.932024	0.0861228	0.0472198
63	14430	25176	25757	16344	19131	18474	22803	13784	14037	1.07529	0.7428	0.972221	0.924435	0.948599	0.973104	0.888924	0.934472	0.939831	0.933297	0.0879463	0.0482196
64	14296	25233	25847	16258	19371	18429	22806	13776	14031	1.07543	0.742369	0.971806	0.915851	0.950746	0.976505	0.884247	0.946195	0.937541	0.93341	0.0888851	0.0487343
65	14230	25027	25870	16220	19570	18422	22873	13712	13956	1.07859	0.738921	0.966611	0.911623	0.942985	0.977373	0.88218	0.955915	0.937185	0.932376	0.090582	0.0496647
66	14219	25181	26010	16254	19679	18377	22823	13715	13930	1.07623	0.739082	0.96481	0.910918	0.948787	0.982663	0.884029	0.961239	0.934896	0.933629	0.090506	0.049623
67	14136	25187	26065	16310	19583	18290	22777	13683	13864	1.07406	0.737358	0.960239	0.905601	0.949013	0.984741	0.887075	0.95655	0.93047	0.931679	0.0903158	0.0495188
68	14039	25301	26130	16206	19378	18237	22746	13795	13837	1.0726	0.743393	0.958369	0.899386	0.953309	0.987196	0.881419	0.946537	0.927774	0.929998	0.0889893	0.0487915
69	13951	25311	26130	16224	19221	18096	22681	13835	13749	1.06954	0.745549	0.952274	0.893749	0.953685	0.987196	0.882398	0.938868	0.920601	0.927095	0.0876731	0.0480698
70	13890	25298	26163	16160	19167	18048	22652	13793	13800	1.06817	0.743285	0.955806	0.889841	0.953196	0.988443	0.878917	0.93623	0.918159	0.925783	0.0886101	0.0485835
71	13775	25202	26170	16150	19185	18049	22657	13787	13842	1.06841	0.742962	0.958715	0.882474	0.949578	0.988708	0.878373	0.937109	0.91821	0.924948	0.0892172	0.0489164
72	13604	25161	26197	16170	19150	18020	22680	13860	13827	1.06949	0.746896	0.957676	0.871519	0.948034	0.989728	0.879461	0.9354	0.916734	0.923882	0.0890826	0.0488426
73	13519	25008	26245	16224	19144	17974	22780	13952	13694	1.07421	0.751854	0.948465	0.866073	0.942269	0.991541	0.882398	0.935107	0.914394	0.922923	0.0887282	0.0486483
74	13482	24910	26320	16101	19150	17910	22717	14031	13637	1.07123	0.756111	0.944517	0.863703	0.938576	0.994375	0.875708	0.9354	0.911138	0.921196	0.0877804	0.0481287
75	13551	24933	26263	15921	19112	17783	22703	14117	13710	1.07057	0.760745	0.949573	0.868124	0.939443	0.992221	0.865918	0.933544	0.904677	0.920535	0.0869877	0.047694
76	13557	24827	26257	15991	19000	17694	22796	14107	13763	1.07496	0.760207	0.953244	0.868508	0.935449	0.991994	0.869725	0.928073	0.90015	0.920257	0.0878288	0.0481552
77	13545	24788	26289	15920	18939	17614	22713	14002	13775	1.07105	0.754548	0.954075	0.867739	0.933979	0.993203	0.865863	0.925093	0.89608	0.917959	0.0888306	0.0487045
78	13630	24782	26358	15749	19009	17494	22652	14024	13736	1.06817	0.755734	0.951374	0.873185	0.933753	0.99581	0.856563	0.928512	0.889975	0.917008	0.0887184	0.0486429
79	13714	24741	26354	15721	19089	17452	22563	14056	13709	1.06397	0.757458	0.949504	0.878566	0.932208	0.995659	0.85504	0.93242	0.887838	0.916963	0.087274	0.047851
80	13619	24772	26472	15735	19302	17410	22553	14028	13602	1.0635	0.755949	0.942093	0.87248	0.933377	1.00012	0.855802	0.942824	0.885702	0.916872	0.0884448	0.0484929
81	13539	24801	26425	15580	19557	17313	22429	14041	13663	1.05765	0.75665	0.946318	0.867355	0.934469	0.998341	0.847371	0.95528	0.880767	0.916023	0.0889938	0.0487939
82	13442	24812	26432	15604	19590	17341	22439	13947	13690	1.05813	0.751584	0.948188	0.861141	0.934884	0.998606	0.848677	0.956892	0.882191	0.915588	0.0906946	0.0497265
83	13412	24834	26452	15641	19550	17199	22492	13943	13615	1.06062	0.751369	0.942993	0.859219	0.935713	0.999362	0.850689	0.954938	0.874968	0.91443	0.0913465	0.0500839
84	13331	24721	26622	15622	19481	17085	22546	13888	13566	1.06317	0.748405	0.939599	0.85403	0.931455	1.00578	0.849656	0.951568	0.869168	0.912537	0.0936728	0.0513593
85	13226	24713	26621	15661	19476	16999	22626	13857	13633	1.06694	0.746734	0.94424	0.847303	0.931153	1.00575	0.851777	0.951324	0.864793	0.912224	0.0955915	0.0524113
86	13311	24686	26676	15666	19451	17019	22798	13867	13587	1.07505	0.747273	0.941054	0.852748	0.930136	1.00782	0.852049	0.950102	0.86581	0.913561	0.09666	0.0529972
87	13195	24740	26576	15725	19556	16919	22775	13780	13589	1.07397	0.742585	0.941192	0.845317	0.932171	1.00405	0.855258	0.955231	0.860723	0.912277	0.0979994	0.0537316
88	13102	24690	26587	15877	19644	16784	22785	13716	13593	1.07444	0.739136	0.941469	0.839359	0.930287	1.00446	0.863525	0.95953	0.853855	0.911785	0.0995535	0.0545836
89	12935	24775	26517	16016	19755	16645	22815	13777	13589	1.07586	0.742423	0.941192	0.82866	0.93349	1.00182	0.871085	0.964952	0.846784	0.911807	0.100413	0.055055
90	12745	24814	26520	16193	19814	16507	22887	13692	13590	1.07925	0.737843	0.941262	0.816488	0.934959	1.00193	0.880712	0.967833	0.839763	0.911116	0.103805	0.0569149
