# Supplementary material for: Light-regulated allosteric switch enables temporal and subcellular control of enzyme activity
Source: eLife. 2020 Sep 23;9:e60647. doi: 10.7554/eLife.60647 (PMC7577742; doi:10.7554/eLife.60647)
Supplement: Figure 5—source data 1. [file elife-60647-fig5-data1.xlsx]

## Sheet: Sheet1
		Kinase Dead LightR-Src										FastLightR-Src			calculated
	Cell	Degrees	Radians	Cos	distance um						Cell	Degrees	Radians	Cos	distance migrated (um)
	1	138	2.40855	-0.743145	0.56						1	14	0.244346	0.970296	3.77
	2	130	2.26893	-0.642788	2						2	-41	-0.715585	0.75471	1.64
	3	-8	-0.139626	0.990268	1.26						3	17	0.296706	0.956305	2.56
	4	45	0.785398	0.707107	0.4						4	0	0	1	0.8
	5	146	2.54818	-0.829038	4.3						5	20	0.349066	0.939693	2.4
	6	85	1.48353	0.0871557	1.26						6	-8	-0.139626	0.990268	1.13
	Average			-0.0717399							7	20	0.349066	0.939693	0.56
	Stdev			0.788681							8	20	0.349066	0.939693	2.4
											9	14	0.244346	0.970296	1.6
											10	14	0.244346	0.970296	0.89
											Average			0.943125
											Stdev			0.0694273
