# Supplementary material for: Light-regulated allosteric switch enables temporal and subcellular control of enzyme activity
Source: eLife journal article supplement (doi:10.7554/elife.60647), 2020-09-23
Supplement: supp1 [file elife-60647-supp1-v3.docx]

**DNA sequences for LightR and LightR constructs**

*LightR (linker-VVD-linker-VVD-linker)*

5’ - ggaccaggtGGCAGCGGAGGT CATACCtTgTAtGCGCCGGGGGGTTATGACATCATGGGTTACCTCATACAGATCATGAAtaGGCCGAACCCACAAGTGGA

GCTcGGACCCGTCGAtACCTCCTGCGCtCTCATtCTGTGTGACCTTAAGCAGAAGGAtACCCCTaTcGTGTACGCCTCCG

AgGCATTtCTGTACATGACaGGGTACTCGAACGCCGAAGTGCTGGGACGGAACTGCCGCTTCCTGCAAagCCCGGATGGA

ATGGTGAAGCCTAAGTCAACCCGCAAATACGTGGACTCCAACACTATCAACACCATGCGCAAGGCCATTGACCGCAATGC

TGAGGTGCAAGTGGAAGTGGTGAACTTCAAGAAGAAtGGACAGCGCTTCGTCAACTTCCTGACTATGATcCCCGTGCGcG

ACGAgACCGGCGAATACCGGTACAGCATGGGGTTTCAGTGtGAGACaGAG

GGCGGCTCCGGAGGCAGCGGCGGTTCTGGAGGTTCCGGTGGCGGCTCCGGAGGTAGCGGAGGGTCT

CACACTCTTTACGCCCCTGGAGGATACGACATTATGGGATATTTGATTCAGATTATGAACCGCCCAAACCCTCAGGTCGA

ACTGGGGCCTGTGGACACGTCATGTGCCCTGATCCTGTGCGATCTGAAGCAAAAGGACACTCCGATTGTCTACGCCTCGG

AAGCCTTCTTGTATATGACCGGATACAGCAATGCAGAGGTGCTCGGTAGGAACTGCAGATTCCTGCAGTCCCCCGACGGG

ATGGTGAAACCAAAGTCGACTCGCAAATATGTGGACTCGAACACGATCAAtACaATgCGGAAGGCCATCGACCGGAACGC

CGAGGTCCAGGTGGAGGTGGTCAACTTTAAGAAGAACGGCCAGCGGTTCGTGAACTTTCTcACCATgATTCCGGTCCGGG

ATGAAACCGGAGAGTACAGATACTCCATGGGATTCCAGTGCGAAACCGAA

GGGTCCGGAggtcccgga – 3’

*FastLightR (linker-VVD (I85V)-linker-VVD (I85V)-linker)*

5’ - ggaccaggtGGCAGCGGAGGT CATACCtTgTAtGCGCCGGGGGGTTATGACATCATGGGTTACCTCATACAGATCATGAAtaGGCCGAACCCACAAGTGGA

GCTcGGACCCGTCGAtACCTCCTGCGCtCTCATtCTGTGTGACCTTAAGCAGAAGGAtACCCCTGTGGTGTACGCCTCCG

AgGCATTtCTGTACATGACaGGGTACTCGAACGCCGAAGTGCTGGGACGGAACTGCCGCTTCCTGCAAagCCCGGATGGA

ATGGTGAAGCCTAAGTCAACCCGCAAATACGTGGACTCCAACACTATCAACACCATGCGCAAGGCCATTGACCGCAATGC

TGAGGTGCAAGTGGAAGTGGTGAACTTCAAGAAGAAtGGACAGCGCTTCGTCAACTTCCTGACTATGATcCCCGTGCGcG

ACGAgACCGGCGAATACCGGTACAGCATGGGGTTTCAGTGtGAGACaGAG

GGCGGCTCCGGAGGCAGCGGCGGTTCTGGAGGTTCCGGTGGCGGCTCCGGAGGTAGCGGAGGGTCT

CACACTCTTTACGCCCCTGGAGGATACGACATTATGGGATATTTGATTCAGATTATGAACCGCCCAAACCCTCAGGTCGA

ACTGGGGCCTGTGGACACGTCATGTGCCCTGATCCTGTGCGATCTGAAGCAAAAGGACACTCCGGTGGTCTACGCCTCGG

AAGCCTTCTTGTATATGACCGGATACAGCAATGCAGAGGTGCTCGGTAGGAACTGCAGATTCCTGCAGTCCCCCGACGGG

ATGGTGAAACCAAAGTCGACTCGCAAATATGTGGACTCGAACACGATCAAtACaATgCGGAAGGCCATCGACCGGAACGC

CGAGGTCCAGGTGGAGGTGGTCAACTTTAAGAAGAACGGCCAGCGGTTCGTGAACTTTCTcACCATgATTCCGGTCCGGG

ATGAAACCGGAGAGTACAGATACTCCATGGGATTCCAGTGCGAAACCGAA

GGGTCCGGAggtcccgga – 3’

*LightR-Src-mCherry-myc*

5’-

atgggcagcaacaagagcaagcccaaggacgccagccagcggcgccgcagcctggagccctcggaaaacgtgcacggggc

agggggcgccttcccggcctcacagacaccgagcaagcccgcctccgccgacggccaccgcgggcccagcgccgccttcg

tgccgcccgcggccgagcccaagctcttcggaggcttcaactcctcggacaccgtcacctccccgcagagggcggggcct

ctggcaggtggggtgaccacctttgtggccctctatgactatgagtcacggacagagactgacctgtccttcaagaaagg

ggagcggctgcagattgttaacaacacggagggagactggtggctggcacactcgctgagcacgggacagaccggttaca

tccccagcaactatgtggcgccctccgactccatccaggctgaggagtggtactttggcaagatcactagacgggaatca

gagcggctgctgctcaacgccgagaacccgagagggaccttcctcgtgagggagagtgagaccacaaaaggtgcctactg

cctctctgtatccgacttcgacaatgccaagggcctaaatgtgaaacactacaagatccgcaagctggacagcggcggtt

tctacatcacctcccgcacccagttcaacagcctgcagcagctcgtggcttactactccaaacatgctgatggcctgtgt

caccgcctcactaccgtatgtcccacatccaagcctcagacccagggattggccaaggatgcgtgggagatcccccggga

gtccctgcggctggaggtcaagctgggccagggttgcttcggagaggtgtggatggggacctggaac

ggaccaggtGGCAGCGGAGGTCATACCtTgTAtGCGCCGGGGGGTTATGACATCATGGGTTACCTCATACAGATCATGAA

taGGCCGAACCCACAAGTGGAGCTcGGACCCGTCGAtACCTCCTGCGCtCTCATtCTGTGTGACCTTAAGCAGAAGGAtA

CCCCTaTcGTGTACGCCTCCGAgGCATTtCTGTACATGACaGGGTACTCGAACGCCGAAGTGCTGGGACGGAACTGCCGC

TTCCTGCAAagCCCGGATGGAATGGTGAAGCCTAAGTCAACCCGCAAATACGTGGACTCCAACACTATCAACACCATGCG

CAAGGCCATTGACCGCAATGCTGAGGTGCAAGTGGAAGTGGTGAACTTCAAGAAGAAtGGACAGCGCTTCGTCAACTTCC

TGACTATGATcCCCGTGCGcGACGAgACCGGCGAATACCGGTACAGCATGGGGTTTCAGTGtGAGACaGAGGGCGGCTCC

GGAGGCAGCGGCGGTTCTGGAGGTTCCGGTGGCGGCTCCGGAGGTAGCGGAGGGTCTCACACTCTTTACGCCCCTGGAGG

ATACGACATTATGGGATATTTGATTCAGATTATGAACCGCCCAAACCCTCAGGTCGAACTGGGGCCTGTGGACACGTCAT

GTGCCCTGATCCTGTGCGATCTGAAGCAAAAGGACACTCCGATTGTCTACGCCTCGGAAGCCTTCTTGTATATGACCGGA

TACAGCAATGCAGAGGTGCTCGGTAGGAACTGCAGATTCCTGCAGTCCCCCGACGGGATGGTGAAACCAAAGTCGACTCG

CAAATATGTGGACTCGAACACGATCAAtACaATgCGGAAGGCCATCGACCGGAACGCCGAGGTCCAGGTGGAGGTGGTCA

ACTTTAAGAAGAACGGCCAGCGGTTCGTGAACTTTCTcACCATgATTCCGGTCCGGGATGAAACCGGAGAGTACAGATAC

TCCATGGGATTCCAGTGCGAAACCGAAGGGTCCGGAggtcccgga

accacgagggttgccatcaaaactctgaagccaggcaccatgtccccagaggccttcctgcaggaggcccaagtcatgaa

gaaactgaggcacgagaaactggtgcagctgtatgctgtggtgtcggaagaacccatttacattgtgacagagtacatga

acaaggggagtctgctggactttctcaagggggaaacgggcaaatatttgcggctaccccagctggtggacatgtctgct

cagatcgcttcaggcatggcctatgtggagcggatgaactatgtgcaccgggaccttcgagccgccaatatcctagtagg

ggagaacctggtgtgcaaagtggccgactttgggttggcccggctcatagaagacaacgaatacacagcccggcaaggtg

ccaaattccccatcaagtggaccgcccctgaagctgctctgtacggcaggttcaccatcaagtcggatgtgtggtccttt

gggattctgctgaccgagctcaccactaagggaagagtgccctatcctgggatggtgaaccgtgaggttctggaccaggt

ggagcggggctaccggatgccttgtccccccgagtgccccgagtccctgcatgaccttatgtgccagtgctggcggaagg

agcccgaggagcggcccaccttcgagtacctgcaggccttcctggaagactactttacgtccactgagccacagtaccag

cccggggagaacctaggcggaccagga

atggtgagcaagggcgaggaggataacatggccatcatcaaggagttcatgcgcttcaaggtgcacatggagggctccgt

gaacggccacgagttcgagatcgagggcgagggcgagggccgcccctacgagggcacccagaccgccaagctgaaggtga

ccaagggtggccccctgcccttcgcctgggacatcctgtcccctcagttcatgtacggctccaaggcctacgtgaagcac

cccgccgacatccccgactacttgaagctgtccttccccgagggcttcaagtgggagcgcgtgatgaacttcgaggacgg

cggcgtggtgaccgtgacccaggactcctccctgcaggacggcgagttcatctacaaggtgaagctgcgcggcaccaact

tcccctccgacggccccgtaatgcagaagaagaccatgggctgggaggcctcctccgagcggatgtaccccgaggacggc

gccctgaagggcgagatcaagcagaggctgaagctgaaggacggcggccactacgacgctgaggtcaagaccacctacaa

ggccaagaagcccgtgcagctgcccggcgcctacaacgtcaacatcaagttggacatcacctcccacaacgaggactaca

ccatcgtggaacagtacgaacgcgccgagggccgccactccaccggcggcatggacgagctgtacaagtccggaagcggg

gagcagaagctgatctccgaggaggacctg - 3’

*LightR-bRaf-Venus*

5’- atggcggcgctgagcggtggcggtggtggcggcgcggagccgggccaggctctgttcaacggggacatggagcccgaggc

cggcgccggcgccggcgccgcggcctcttcggctgcggaccctgccattccggaggaggtgtggaatatcaaacaaatga

ttaagttgacacaggaacatatagaggccctattggacaaatttggtggggagcataatccaccatcaatatatctggag

gcctatgaagaatacaccagcaagctagatgcactccaacaaagagaacaacagttattggaatctctggggaacggaac

tgatttttctgtttctagctctgcatcaatggataccgttacatcttcttcctcttctagcctttcagtgctaccttcat

ctctttcagtttttcaaaatcccacagatgtggcacggagcaaccccaagtcaccacaaaaacctatcgttagagtcttc

ctgcccaacaaacagaggacagtggtacctgcaaggtgtggagttacagtccgagacagtctaaagaaagcactgatgat

gagaggtctaatcccagagtgctgtgctgtttacagaattcaggatggagagaagaaaccaattggttgggacactgata

tttcctggcttactggagaagaattgcatgtggaagtgttggagaatgttccacttacaacacacaactttgtacgaaaa

acgtttttcaccttagcattttgtgacttttgtcgaaagctgcttttccagggtttccgctgtcaaacatgtggttataa

atttcaccagcgttgtagtacagaagttccactgatgtgtgttaattatgaccaacttgatttgctgtttgtctccaagt

tctttgaacaccacccaataccacaggaagaggcgtccttagcagagactgccctaacatctggatcatccccttccgca

cccgcctcggactctattgggccccaaattctcaccagtccgtctccttcaaaatccattccaattccacagcccttccg

accagcagatgaagatcatcgaaatcaatttgggcaacgagaccgatcctcatcagctcccaatgtgcatataaacacaa

tagaacctgtcaatattgatgacttgattagagaccaaggatttcgtggtgatggaggatcaaccacaggtttgtctgct

accccccctgcctcattacctggctcactaactaacgtgaaagccttacagaaatctccaggacctcagcgagaaaggaa

gtcatcttcatcctcagaagacaggaatcgaatgaaaacacttggtagacgggactcgagtgatgattgggagattcctg

atgggcagattacagtgggacaaagaattggatctGGATCATTTGGAACAGTCTACAAGGGAAAGTGG

ggaccaggtggcagcggaggtcatacctTgTAtGCGCCGGGGGGTTATGACATCATGGGTTACCTCATACAGATCATGAA

taGGCCGAACCCACAAGTGGAGCTcGGACCCGTCGAtACCTCCTGCGCtCTCATtCTGTGTGACCTTAAGCAGAAGGAtA

CCCCTaTcGTGTACGCCTCCGAgGCATTtCTGTACATGACaGGGTACTCGAACGCCGAAGTGCTGGGACGGAACTGCCGC

TTCCTGCAAagCCCGGATGGAATGGTGAAGCCTAAGTCAACCCGCAAATACGTGGACTCCAACACTATCAACACCATGCG

CAAGGCCATTGACCGCAATGCTGAGGTGCAAGTGGAAGTGGTGAACTTCAAGAAGAAtGGACAGCGCTTCGTCAACTTCC

TGACTATGATcCCCGTGCGcGACGAgACCGGCGAATACCGGTACAGCATGGGGTTTCAGTGtGAGACaGAGGGCGGCTCC

GGAGGCAGCGGCGGTTCTGGAGGTTCCGGTGGCGGCTCCGGAGGTAGCGGAGGGTCTCACACTCTTTACGCCCCTGGAGG

ATACGACATTATGGGATATTTGATTCAGATTATGAACCGCCCAAACCCTCAGGTCGAACTGGGGCCTGTGGACACGTCAT

GTGCCCTGATCCTGTGCGATCTGAAGCAAAAGGACACTCCGATTGTCTACGCCTCGGAAGCCTTCTTGTATATGACCGGA

TACAGCAATGCAGAGGTGCTCGGTAGGAACTGCAGATTCCTGCAGTCCCCCGACGGGATGGTGAAACCAAAGTCGACTCG

CAAATATGTGGACTCGAACACGATCAAtACaATgCGGAAGGCCATCGACCGGAACGCCGAGGTCCAGGTGGAGGTGGTCA

ACTTTAAGAAGAACGGCCAGCGGTTCGTGAACTTTCTcACCATgATTCCGGTCCGGGATGAAACCGGAGAGTACAGATAC

TCCATGGGATTCCAGtgcgaaaccgaagggtccggaggtcccgga

GGTGATGTGGCAGTGAAAATGTTGAATGTGacagcacctacacctcagcagttacaagccttcaaaaatgaagtaggagt

actcaggaaaacacgacatgtgaatatcctactcttcatgggctattccacaaagccacaactggctattgttacccagt

ggtgtgagggctccagcttgtatcaccatctccatatcattgagaccaaatttgagatgatcaaacttatagatattgca

cgacagactgcacagggcatggattacttacacgccaagtcaatcatccacagagacctcaagagtaataatatatttct

tcatgaagacctcacagtaaaaataggtgattttggtctagctacagagaaatctcgatggagtgggtcccatcagtttg

aacagttgtctggatccattttgtggatggcaccagaagtcatcagaatgcaagataaaaatccatacagctttcagtca

gatgtatatgcatttggaattgttctgtatgaattgatgactggacagttaccttattcaaacatcaacaacagggacca

gataatttttatggtgggacgaggatacctgtctccagatctcagtaaggtacggagtaactgtccaaaagccatgaaga

gattaatggcagagtgcctcaaaaagaaaagagatgagagaccactctttccccaaattctcgcctctattgagctgctg

gcccgctcattgccaaaaattcaccgcagtgcatcagaaccctccttgaatcgggctggtttccaaacagaggattttag

tctatatgcttgtgcttctccaaaaacacccatccaggcagggggatatggtgcgtttcctgtccac

Aagcttcgaattctgcagtcgacggtaccgcgggcccgggatccaccggtcgccaccatggtgagcaagggcgaggagct

gttcaccggggtggtgcccatcctggtcgagctggacggcgacgtaaacggccacaagttcagcgtgtccggcgagggcg

agggcgatgccacctacggcaagctgaccctgaagttcatctgcaccaccggcaagctgcccgtgccctggcccaccctc

gtgaccaccctgacctacggcgtgcagtgcttcagccgctaccccgaccacatgaagcagcacgacttcttcaagtccgc

catgcccgaaggctacgtccaggagcgcaccatcttcttcaaggacgacggcaactacaagacccgcgccgaggtgaagt

tcgagggcgacaccctggtgaaccgcatcgagctgaagggcatcgacttcaaggaggacggcaacatcctggggcacaag

ctggagtacaactacaacagccacaacgtctatatcatggccgacaagcagaagaacggcatcaaggtgaacttcaagat

ccgccacaacatcgaggacggcagcgtgcagctcgccgaccactaccagcagaacacccccatcggcgacggccccgtgc

tgctgcccgacaaccactacctgagcacccagtccgccctgagcaaagaccccaacgagaagcgcgatcacatggtcctg

ctggagttcgtgaccgccgccgggatcactctcggcatggacgagctgtacaagtaa – 3’

*LightR-Cre-miRFP*

5’-

atggtgcccaagaagaagaggaaagtctccaacctgctgactgtgcaccaaaacctgcctgccctccctgtggatgccac

ctctgatgaagtcaggaagaacctgatggacatgttcagggacaggcaggccttctctgaacacacctggaagatgctcc

tgtctgtgtgcagatcctgggctgcctggtgcaagctgaacaacaggaaatggttccctgctgaacctgaggatgtgagg

gactacctcctgtacctgcaagccagaggcctggctgtgaagaccatccaacagcacctgggccagctcaacatgctgca

caggagatctggcctgcctcgcccttctgactccaatgctgtgtccctggtgatgaggagaatcagaaaggagaatgtgg

atgctggggagagagccaagcaggccctggcctttgaacgcactgactttgaccaagtcagatccctgatggagaactct

ggaccaggtGGCAGCGGAGGTCATACCtTgTAtGCGCCGGGGGGTTATGACATCATGGGTTACCTCATACAGATCATGAA

taGGCCGAACCCACAAGTGGAGCTcGGACCCGTCGAtACCTCCTGCGCtCTCATtCTGTGTGACCTTAAGCAGAAGGAtA

CCCCTaTcGTGTACGCCTCCGAgGCATTtCTGTACATGACaGGGTACTCGAACGCCGAAGTGCTGGGACGGAACTGCCGC

TTCCTGCAAagCCCGGATGGAATGGTGAAGCCTAAGTCAACCCGCAAATACGTGGACTCCAACACTATCAACACCATGCG

CAAGGCCATTGACCGCAATGCTGAGGTGCAAGTGGAAGTGGTGAACTTCAAGAAGAAtGGACAGCGCTTCGTCAACTTCC

TGACTATGATcCCCGTGCGcGACGAgACCGGCGAATACCGGTACAGCATGGGGTTTCAGTGtGAGACaGAGGGCGGCTCC

GGAGGCAGCGGCGGTTCTGGAGGTTCCGGTGGCGGCTCCGGAGGTAGCGGAGGGTCTCACACTCTTTACGCCCCTGGAGG

ATACGACATTATGGGATATTTGATTCAGATTATGAACCGCCCAAACCCTCAGGTCGAACTGGGGCCTGTGGACACGTCAT

GTGCCCTGATCCTGTGCGATCTGAAGCAAAAGGACACTCCGATTGTCTACGCCTCGGAAGCCTTCTTGTATATGACCGGA

TACAGCAATGCAGAGGTGCTCGGTAGGAACTGCAGATTCCTGCAGTCCCCCGACGGGATGGTGAAACCAAAGTCGACTCG

CAAATATGTGGACTCGAACACGATCAAtACaATgCGGAAGGCCATCGACCGGAACGCCGAGGTCCAGGTGGAGGTGGTCA

ACTTTAAGAAGAACGGCCAGCGGTTCGTGAACTTTCTcACCATgATTCCGGTCCGGGATGAAACCGGAGAGTACAGATAC

TCCATGGGATTCCAGTGCGAAACCGAAGGGTCCGGAggtcccgga

agatgccaggacatcaggaacctggccttcctgggcattgcctacaacaccctgctgcgcattgccgaaattgccagaat

cagagtgaaggacatctcccgcaccgatggtgggagaatgctgatccacattggcaggaccaagaccctggtgtccacag

ctggtgtggagaaggccctgtccctgggggttaccaagctggtggagagatggatctctgtgtctggtgtggctgatgac

cccaacaactacctgttctgccgggtcagaaagaatggtgtggctgccccttctgccacctcccaactgtccacccgggc

cctggaagggatctttgaggccacccaccgcctgatctatggtgccaaggatgactctgggcagagatacctggcctggt

ctggccactctgccagagtgggtgctgccagggacatggccagggctggtgtgtccatccctgaaatcatgcaggctggt

ggctggaccaatgtgaacattgtgatgaactacatcagaaacctggactctgagactggggccatggtgaggctgctcga

ggatggggacAgaattctgcagtcgacggtaccgcgggcccgggatccaccggtcgccacc

atggtagcaggtcatgcctctggcagccccgcattcgggaccgcctctcattcgaattgcgaacatgaagagatccacct

cgccggctcgatccagccgcatggcgcgcttctggtcgtcagcgaacatgatcatcgcgtcatccaggccagcgccaacg

ccgcggaatttctgaatctcggaagcgtactcggcgttccgctcgccgagatcgacggcgatctgttgatcaagatcctg

ccgcatctcgatcccaccgccgaaggcatgccggtcgcggtgcgctgccggatcggcaatccctctacggagtactgcgg

tctgatgcatcggcctccggaaggcgggctgatcatcgaactcgaacgtgccggcccgtcgatcgatctgtcaggcacgc

tggcgccggcgctggagcggatccgcacggcgggttcactgcgcgcgctgtgcgatgacaccgtgctgctgtttcagcag

tgcaccggctacgaccgggtgatggtgtatcgtttcgatgagcaaggccacggcctggtattctccgagtgccatgtgcc

tgggctcgaatcctatttcggcaaccgctatccgtcgtcgactgtcccgcagatggcgcggcagctgtacgtgcggcagc

gcgtccgcgtgctggtcgacgtcacctatcagccggtgccgctggagccgcggctgtcgccgctgaccgggcgcgatctc

gacatgtcgggctgcttcctgcgctcgatgtcgccgtgccatctgcagttcctgaaggacatgggcgtgcgcgccaccct

ggcggtgtcgctggtggtcggcggcaagctgtggggcctggttgtctgtcaccattatctgccgcgcttcatccgtttcg

agctgcgggcgatctgcaaacggctcgccgaaaggatcgcgacgcggatcaccgcgcttgagagc – 3’

*eGFP-LightR-Abl*

5’-ATGGTGAGCAAGGGCGAGGAGCTGTTCACCGGGGTGGTGCCCATCCTGGTCGAGCTGGACGGCGACGTAAACGGCCACAAGTTCAGCGTGTCCGGCGAGGGCGAGGGCGATGCCACCTACGGCAAGCTGACCCTGAAGTTCATCTGCACCACCGGCAAGCTGCCCGTGCCCTGGCCCACCCTCGTGACCACCCTGACCTACGGCGTGCAGTGCTTCAGCCGCTACCCCGACCACATGAAGCAGCACGACTTCTTCAAGTCCGCCATGCCCGAAGGCTACGTCCAGGAGCGCACCATCTTCTTCAAGGACGACGGCAACTACAAGACCCGCGCCGAGGTGAAGTTCGAGGGCGACACCCTGGTGAACCGCATCGAGCTGAAGGGCATCGACTTCAAGGAGGACGGCAACATCCTGGGGCACAAGCTGGAGTACAACTACAACAGCCACAACGTCTATATCATGGCCGACAAGCAGAAGAACGGCATCAAGGTGAACTTCAAGATCCGCCACAACATCGAGGACGGCAGCGTGCAGCTCGCCGACCACTACCAGCAGAACACCCCCATCGGCGACGGCCCCGTGCTGCTGCCCGACAACCACTACCTGAGCACCCAGTCCGCCCTGAGCAAAGACCCCAACGAGAAGCGCGATCACATGGTCCTGCTGGAGTTCGTGACCGCCGCCGGGATCACTCTCGGCATGGACGAGCTGTACAAGTCCGGACTCAGATCTTCCGGATCCACC

ATGGGGCAGCAGCCTGGAAAAGTTCTTGGGGACCAAAGAAGGCCTAGTTTGCCCGCCCTGCATTTTATCAAAGGGGCAGG

GAAGAGGGACTCATCGAGGCATGGGGGCCCACACTGCAATGTCTTTGTGGAACACGAAGCCCTGCAGAGGCCAGTGGCAT

CTGACTTTGAGCCCCAGGGTCTCAGCGAAGCAGCTCGATGGAACTCCAAGGAAAACCTTCTTGCTGGGCCCAGTGAAAAT

GACCCCAACCTTTTTGTGGCACTCTATGATTTTGTGGCCAGTGGAGATAACACTCTCAGCATCACTAAAGGTGAAAAGCT

CCGGGTCTTGGGTTATAATCACAATGGGGAATGGTGTGAAGCCCAAACGAAAAATGGCCAAGGATGGGTCCCAAGCAACT

ACATCACCCCCGTCAACAGTCTGGAGAAACACTCCTGGTACCATGGGCCTGTGTCCCGCAATGCCGCTGAGTATCTGCTG

AGCAGCGGGATCAATGGCAGCTTCTTGGTGCGTGAGAGTGAGAGCAGTCCTGGCCAGAGGTCCATCTCGCTGAGATACGA

AGGGAGGGTGTACCATTACAGGATCAACACTGCTTCTGATGGCAAGCTCTACGTCTCCTCCGAGAGCCGCTTCAACACCC

TGGCCGAGTTGGTTCATCATCATTCAACGGTGGCCGACGGGCTCATCACCACGCTCCATTATCCAGCCCCAAAGCGCAAC

AAGGAAACTGTCTATGGTGTGTCCGAGAACTACGACAAGTGGGAGATGGAACGCACGGACATCACCATGAAGCACAAGCT

GGGCGGGGGCCAGTACGGGGAGGTGTACGAGGGCGTGTGGAAG

GGACCAGGTGGCAGCGGAGGTCATACCTTGTATGCGCCGGGGGGTTATGACATCATGGGTTACCTCATACAGATCATGAA

TAGGCCGAACCCACAAGTGGAGCTCGGACCCGTCGATACCTCCTGCGCTCTCATTCTGTGTGACCTTAAGCAGAAGGATA

CCCCTGTGGTGTACGCCTCCGAGGCATTTCTGTACATGACAGGGTACTCGAACGCCGAAGTGCTGGGACGGAACTGCCGC

TTCCTGCAAAGCCCGGATGGAATGGTGAAGCCTAAGTCAACCCGCAAATACGTGGACTCCAACACTATCAACACCATGCG

CAAGGCCATTGACCGCAATGCTGAGGTGCAAGTGGAAGTGGTGAACTTCAAGAAGAATGGACAGCGCTTCGTCAACTTCC

TGACTATGATCCCCGTGCGCGACGAGACCGGCGAATACCGGTACAGCATGGGGTTTCAGTGTGAGACAGAGGGCGGCTCC

GGAGGCAGCGGCGGTTCTGGAGGTTCCGGTGGCGGCTCCGGAGGTAGCGGAGGGTCTCACACTCTTTACGCCCCTGGAGG

ATACGACATTATGGGATATTTGATTCAGATTATGAACCGCCCAAACCCTCAGGTCGAACTGGGGCCTGTGGACACGTCAT

GTGCCCTGATCCTGTGCGATCTGAAGCAAAAGGACACTCCGATTGTCTACGCCTCGGAAGCCTTCTTGTATATGACCGGA

TACAGCAATGCAGAGGTGCTCGGTAGGAACTGCAGATTCCTGCAGTCCCCCGACGGGATGGTGAAACCAAAGTCGACTCG

CAAATATGTGGACTCGAACACGATCAATACAATTCGGAAGGCCATCGACCGGAACGCCGAGGTCCAGGTGGAGGTGGTCA

ACTTTAAGAAGAACGGCCAGCGGTTCGTGAACTTTCTCACCATTATTCCGGTCCGGGATGAAACCGGAGAGTACAGATAC

TCCATGGGATTCCAGTGCGAAACCGAAGGGTCCGGAAGTCCCGGA TACAGCCTGACGGTGGCCGTGAAGACCTTGAAGGATGAACCCATGGAGGTGGAAAAATTCTTGAAAGAACCTGCAGTCTT

GAAAGAAATCAAAACCCCTAACCTGGGGCACCTCCTTGGGGTCTGCCCCCGGGAGCCCCCGTTCTATATCATCACTGAGT

TCATGACCTACGGGAACCTCCTGGACTACCTGAGGGAGTGCAACCGGCAGGAGGTGAACGCCGTGGTGCTGCTGTACATG

GCCACTCAGATCTCGTCAGCCATGGAGTACCTGGAGAAGAAAAACTTCATCCACAGAGATCTTGCTGCCCGAAACTGCCT

GGTAGGGGAGAACCACTTGGTGAAGGTAGCTGATTTTGGCCTGAGCAGGTTGATGACAGGGGACACCTACACAGCCCATG

CTGGAGCCAAGTTCCCCATCAAATGGACTGCACCCGAGAGCCTGGCCTACAACAAGTTCTCCATCAAGTCCGACGTCTGG

GCATTTGGAGTATTGCTTTGGGAAATTGCTACCTATGGCATGTCCCCTTACCCGGGAATTGACCTGTCCCAGGTGTATGA

GCTGCTAGAGAAGGACTACCGCATGGAGCGCCCAGAAGGCTGCCCAGAGAAGGTCTATGAACTCATGCGAGCATGTTGGC

AGTGGAATCCCTCTGACCGGCCCTCCTTTGCTGAAATCCACCAAGCCTTTGAAACAATGTTCCAGGAATCCAGTATCTCA

GACGAAGTGGAAAAGGAGCTGGGGAAACAAGGCGTCCGTGGGGCTGTGAGTACCTTGCTGCAGGCCCCAGAGCTGCCCAC

CAAGACGAGGACCTCCAGGAGAGCTGCAGAGCACAGAGACACCACTGACGTGCCTGAGATGCCTCACTCCAAGGGCCAGG

GAGAGAGCGATCCTCTGGACCATGAGCCTGCCGTGTCTCCATTGCTCCCTCGAAAAGAGCGAGGTCCCCCGGAGGGCGGC

CTGAATGAAGATGAGCGCCTTCTCCCCAAAGACAAAAAGACCAACTTGTTCAGCGCCTTGATCAAGAAGAAGAAGAAGAC

AGCCCCAACCCCTCCCAAACGCAGCAGCTCCTTCCGGGAGATGGACGGCCAGCCGGAACGCAAAGGGGCCGGCGAGGAAG

AGGGCCGAGACATCACCAACGGGGCACTGGCTTTCACCCCCTTGGACACAGCTGACCCAGCCAAGTCCCCAAAGCCCAGC

AATGGGGCTGGGGTCCCCAATGGAGCCCTCCGGGAGTCCGGGGGCTCAGGCTTCCGGTCTCCCCACCTGTGGAAGAAGTC

CAGCACGCTGACCAGCAGCCGCCTAGCCACCGGCGAGGAGGAGGGCGGTGGCAGCTCCAGCAAGCGCTTCCTGCGCTCTT

GCTCCGCCTCCTGCGTTCCCCATGGGGCCAAGGACACGGAGTGGAGGTCAGTCACGCTGCCTCGGGACTTGCAGTCCACG

GGAAGACAGTTTGACTCGTCCACATTTGGAGGGCACAAAAGTGAGAAGCCGGCTCTGCCTCGGAAGAGGGCAGGGGAGAA

CAGGTCTGACCAGGTGACCCGAGGCACAGTAACGCCTCCCCCCAGGCTGGTGAAAAAGAATGAGGAAGCTGCTGATGAGG

TCTTCAAAGACATCATGGAGTCCAGCCCGGGCTCCAGCCCGCCCAACCTGACTCCAAAACCCCTCCGGCGGCAGGTCACC

GTGGCCCCTGCCTCGGGCCTCCCCCACAAGGAAGAAGCTGGAAAGGGCAGTGCCTTAGGGACCCCTGCTGCAGCTGAGCC

AGTGACCCCCACCAGCAAAGCAGGCTCAGGTGCACCAGGGGGCACCAGCAAGGGCCCCGCCGAGGAGTCCAGAGTGAGGA

GGCACAAGCACTCCTCTGAGTCGCCAGGGAGGGACAAGGGGAAATTGTCCAGGCTCAAACCTGCCCCGCCGCCCCCACCA

GCAGCCTCTGCAGGGAAGGCTGGAGGAAAGCCCTCGCAGAGCCCGAGCCAGGAGGCGGCCGGGGAGGCAGTCCTGGGCGC

AAAGACAAAAGCCACGAGTCTGGTTGATGCTGTGAACAGTGACGCTGCCCAGCCCAGCCAGCCGGGAGAGGGCCTCAAAA

AGCCCGTGCTCCCGGCCACTCCAAAGCCACAGTCCGCCAAGCCGTCGGGGACCCCCATCAGCCCAGCCCCCGTTCCCTCC

ACGTTGCCATCAGCATCCTCGGCCCTGGCAGGGGACCAGCCGTCTTCCACCGCCTTCATCCCTCTCATATCAACCCGAGT

GTCTCTTCGGAAAACCCGCCAGCCTCCAGAGCGGATCGCCAGCGGCGCCATCACCAAGGGCGTGGTCCTGGACAGCACCG

AGGCGCTGTGCCTCGCCATCTCTAGGAACTCCGAGCAGATGGCCAGCCACAGCGCAGTGCTGGAGGCCGGCAAAAACCTC

TACTCGTTCTGCGTGAGCTATGTGGATTCCATCCAGCAAATGAGGAACAAGTTTGCCTTCCGAGAGGCCATCAACAAACT

GGAGAATAATCTCCGGGAGCTTCAGATCTGCCCGGCGACAGCAGGCAGTGGTCCAGCGGCCACTCAGGACTTCAGCAAGC

TCCTCAGTTCGGTGAAGGAAATCAGTGACATAGTGCAGAGG -3’
